# Supplementary material for: Fluid balance trajectories and outcomes in acute heart failure complicated by acute kidney injury: Insights from the MIMIC-IV database
Source: Research Square preprint supplement (doi:10.21203/rs.3.rs-7930504/v1), 2025-12-08
Supplement: Supplementary file 1 [file 2c0c0b7077370a1d2522bb34.xlsx]

## Sheet: Sheet1
	Model 1: cox regression outcome (28d)				Model 2: cox regression outcome (365d)
Group	HR	Lower 95	Upper 95	P. Value	HR	Lower 95	Upper 95	P. Value
Cluster 1	-	-	-	-	-	-	-	-
Cluster 2	2.85	1.35	6.04	0.006	1.69	1.01	2.83	0.044
Cluster 3	0.98	0.63	1.52	0.919	0.781	0.61	0.999	0.049
	Model 1		Model 2
	df	P. Value	df	P.Value
Likelihood Ration	2	0.05	2	0.01
Wald test	2	0.017	2	0.008
Score test	2	0.011	2	0.007
