# Supplementary material for: Fluid balance trajectories and outcomes in acute heart failure complicated by acute kidney injury: Insights from the MIMIC-IV database
Source: Research Square preprint supplement (doi:10.21203/rs.3.rs-7930504/v1), 2025-12-08
Supplement: Supplementary file 2 [file 6cc1eb32475116de1ba3a620.xlsx]

## Sheet: Result 1
subject_id	hadm_id	stay_id	gender	admission_age	marital_status	race	insurance	language	dischtime	admittime	icu_intime	icu_outtime	los_hospital	los_icu	dod	hospital_expire_flag	survival_days	mortality_28	mortality_365	height	weight	aki	apsiii	sofa	sirs	charlson	aki_score	aki_time	wbc_first	platelet_first	creatinine_first	bun_first	troponin_t_first	ntprobnp_first	sodium_first	hemoglobin_first	wbc_avg	platelet_avg	creatinine_avg	bun_avg	troponin_t_avg	ntprobnp_avg	sodium_avg	hemoglobin_avg	呼吸机应用	crrt_during_hospitalization	vasoactive_agent_during_hospitalization	血管活性药物	input_d1
17445720	21542502	30005199	M	30.59333187919851008981	MARRIED	BLACK/AFRICAN AMERICAN	Medicaid	English	2142-08-31 17:00:00.000000	2142-08-05 17:02:00.000000	2142-08-05 17:03:16.000000	2142-08-23 17:09:36.000000	25.9986111111111111	18		0		0	0	173	57	1	49	7	2	2	2	2142-08-07 18:00:00.000000	4.2	207	1.7	40			133	13.9	4.35	206	1.7	39.333333333333336			132.66666666666666	13.549999999999999	1	0	0	0
10106899	22953864	30008792	F	86.55998450646724941576	DIVORCED	WHITE - EASTERN EUROPEAN	Medicare	English	2178-07-29 22:41:00.000000	2178-07-24 12:43:00.000000	2178-07-24 14:56:00.000000	2178-07-30 06:57:54.000000	5.4152777777777778	5.67	2178-07-29	1	5	1	1	168	71.6	1	36	6	2	6	2	2178-07-27 07:00:00.000000	10.9	332	1.4	37	0.11		137	11.1	10.9	332	1.4	37	0.11		137	11.1	1	0	1	1	982.6152910906821
12780478	28468774	30009505	M	75.4992392410754757	MARRIED	WHITE	Medicare	English	2155-07-17 17:40:00.000000	2155-07-02 19:05:00.000000	2155-07-02 19:56:14.000000	2155-07-15 17:06:07.000000	14.9409722222222222	12.88		0		0	0	183	100.4	1	16	9	1	6	2	2155-07-04 11:04:00.000000	6.9	201	1.2	16	0.05		139	14	6.95	191.5	1.25	16.5	0.037500000000000006		139	13.55	1	0	1	1	1083.0439265668392
14992874	23580850	30010785	F	71.6581985368604925	SINGLE	WHITE	Medicare	English	2171-09-07 18:45:00.000000	2171-08-29 15:27:00.000000	2171-08-29 17:10:00.000000	2171-09-01 21:55:04.000000	9.1375	3.2		0		0	0		58	1	52	7	0	5	2	2171-08-30 20:00:00.000000	4.2	558	0.9	14			141	4.6	7.466666666666666	446.3333333333333	0.9666666666666667	14.333333333333334			143	7.766666666666666	1	0	1	1	2779.6076729148626
15140113	23125645	30050950	F	63.6435055387934575	SINGLE	BLACK/AFRICAN AMERICAN	Medicare	English	2132-09-02 13:40:00.000000	2132-08-23 04:21:00.000000	2132-08-23 08:13:14.000000	2132-08-27 15:33:35.000000	10.3881944444444444	4.31		0		0	0	160	137.6	1	28	1	2	5	3	2132-08-25 00:00:00.000000	5.4	170	1	19			138	13.4	4.35	174	1.0333333333333334	21.666666666666668			140.66666666666666	13.100000000000001	0	0	0	0	729.9999904632568
11328158	27985960	30052733	F	82.1767903198427344	MARRIED	WHITE	Medicare	English	2183-03-14 15:40:00.000000	2183-03-06 18:45:00.000000	2183-03-07 11:04:07.000000	2183-03-14 16:40:30.000000	7.8715277777777778	7.23	2183-03-14	1	8	1	1		57.3	1	61	6	2	7	2	2183-03-10 17:00:00.000000	8.1	318	0.5	12	0.13	10316	139	10.4	8.399999999999999	316	0.5	11.5	0.13	10316	138	9.850000000000001	0	0	0	0	2231.1779186055064
19352034	21509557	30058866	M	64.29318651134803165512		UNKNOWN	Medicaid	Spanish	2114-05-12 16:40:00.000000	2114-04-18 02:01:00.000000	2114-04-18 02:02:38.000000	2114-04-30 21:41:14.000000	24.6104166666666667	12.82		0		0	0	173	77	1	83	11	2	6	2	2114-04-22 04:02:00.000000	9.7	296	1.3	14	15.81		141	11.7	12.662500000000001	480.75	1.4833333333333334	37.666666666666664	14.0425		144.42857142857142	9.712499999999999	1	0	1	1	6575.1944936756045
10512942	29558617	30072676	M	67.61797497732097257891	MARRIED	WHITE	Medicare	English	2177-08-27 16:37:00.000000	2177-08-14 17:03:00.000000	2177-08-16 10:54:24.000000	2177-08-19 17:38:44.000000	12.9819444444444444	3.28		0		0	0	175	109.5	1	42	4	2	6	2	2177-08-18 02:00:00.000000	27	249	1	32			137	14.1	25.96666666666667	273.6666666666667	0.95	29.5			137	11.4125	0	0	0	0
10012789	29252361	30072752	M	71.8042213564339990107	MARRIED	WHITE - OTHER EUROPEAN	Medicare	English	2137-10-29 17:00:00.000000	2137-10-21 17:39:00.000000	2137-10-21 18:16:00.000000	2137-10-27 14:28:42.000000	7.9729166666666667	5.84		0		0	0	175	132	1	17	2	1	5	3	2137-10-23 06:00:00.000000	8	250	0.7	10			138	13.5	7.7	248	0.7666666666666666	10			138.33333333333334	13.25	0	0	0	0
12788516	23561412	30073098	F	60.7309547885754894	SINGLE	WHITE	Medicare	English	2168-10-17 16:52:00.000000	2168-09-24 16:50:00.000000	2168-09-24 19:20:00.000000	2168-09-29 16:36:28.000000	23.0013888888888889	4.89	2169-01-03	0	101	0	1	152	131	0	49	1	3	6	0		11.2	186	0.9	34			131	10.4	15.7	229.5	0.9166666666666666	51.333333333333336			129.5	11.3	0	0	0	0	3652.533367179334
17948389	23258307	30074429	F	91.44005831141483667754	MARRIED	WHITE	Medicare	English	2147-06-14 17:40:00.000000	2147-06-10 17:28:00.000000	2147-06-10 17:28:35.000000	2147-06-13 21:07:00.000000	4.0083333333333333	3.15	2147-10-29	0	141	0	1	163	72.7	1	27	4	3	6	3	2147-06-11 18:00:00.000000	14.1	282	1.4	32	0.34		140	12.1	13.45	278.5	1.4	32	0.3766666666666667		139.66666666666666	12.05	0	0	0	0	762.8259368613362
11643115	20492519	30108775	M	53.5566362697730393669	DIVORCED	WHITE		English	2172-08-02 15:30:00.000000	2172-07-22 07:22:00.000000	2172-07-27 16:08:54.000000	2172-07-31 13:54:30.000000	11.3388888888888889	3.91		0		0	0	178	88	1	43	7	2	4	2	2172-07-29 10:00:00.000000	21.2	305	0.9	24	0.88		135	12.7	16.18	229.8	0.675	19.25	0.85		136.72727272727272	10.7	1	0	1	1	13533.644979830831
10268877	25238883	30109460	M	64.16140934564541378654	SINGLE	WHITE	Private	English	2181-04-03 16:35:00.000000	2181-02-28 22:53:00.000000	2181-02-28 22:54:04.000000	2181-04-03 16:45:46.000000	33.7375	33.74	2181-05-05	0	66	0	1	168	88.9	1	71	20	3	7	3	2181-03-03 04:20:00.000000	8	141	1.6	53	0.25		141	12.8	8.3	120.5	1.4000000000000001	58	0.73		136.75	13.225	1	0	1	1	7127.6
14674839	27431630	30116296	F	69.86918019042473513756	MARRIED	WHITE	Medicare	English	2126-12-09 14:00:00.000000	2126-11-14 11:04:00.000000	2126-11-14 12:37:00.000000	2126-11-17 13:55:52.000000	25.1222222222222222	3.05	2126-12-10	0	26	1	1		102	1	36	4	3	13	3	2126-11-15 15:04:00.000000	16.3	89	1.1	23			141	8.2	16.3	89	1.15	24			139.5	8.2	0	0	0	0	1749.6148428060114
15956706	26653641	30117047	M	83.39577450627863778597	SINGLE	WHITE	Medicare	English	2121-06-01 17:30:00.000000	2121-05-25 13:17:00.000000	2121-05-25 13:17:54.000000	2121-05-30 11:55:49.000000	7.1756944444444444	4.94		0		0	0	175	69.7	1	35	10	3	7	2	2121-05-27 01:58:00.000000	10.4	125	0.9	17			139	13.4	10.899999999999999	129.66666666666666	0.95	15.5			136.75	9.577777777777778	1	0	1	1	9074.939572477713
10943603	28542014	30119186	F	79.16050621536162629465	WIDOWED	ASIAN - CHINESE	Medicare	Chinese	2178-03-03 19:08:00.000000	2178-02-28 14:58:00.000000	2178-02-28 16:20:00.000000	2178-03-03 19:15:09.000000	3.1736111111111111	3.12		0		0	0		90.7	1	78	11	1	5	1	2178-03-01 21:47:00.000000	7.2	181	1.4	64	0.02		141	9.4	7.2	181	1.4666666666666668	61	0.02		142.66666666666666	9.4	1	0	1	1	896.9602164430544
17871297	25912782	30119899	F	54.85651164920183817244	SINGLE	HISPANIC/LATINO - PUERTO RICAN	Medicaid	Spanish	2110-11-16 18:57:00.000000	2110-11-09 20:01:00.000000	2110-11-09 21:51:00.000000	2110-11-13 20:31:57.000000	6.9555555555555556	3.95		0		0	0	157	106	1	22	6	1	2	1	2110-11-11 03:00:00.000000	6.1	112	1.1	14			145	8.9	5.65	108.5	1.0666666666666667	14.666666666666666			146.66666666666666	8.9	1	0	1	1	2692.8213243708014
11280205	23471060	30134437	M	60.38541417592841032643	MARRIED	WHITE		English	2167-07-02 19:13:00.000000	2167-05-21 18:28:00.000000	2167-05-21 18:32:12.000000	2167-05-27 02:27:49.000000	42.0312	5.33		0		0	0		115.5	1	26	6	2	5	2	2167-05-23 11:00:00.000000	8.4	152	1.1	20			140	15.2	6.257142857142857	150.14285714285714	0.9857142857142857	23			139.28571428571428	15.52727272727273	0	0	0	0	1200
19623193	23107741	30147954	F	75.5903934164806408	SINGLE	WHITE	Medicare	English	2144-08-11 13:20:00.000000	2144-08-03 21:05:00.000000	2144-08-03 22:35:00.000000	2144-08-07 14:10:48.000000	7.6770833333333333	3.65	2146-03-05	0	579	0	0		61	0	46	2	3	6	0		6.4	306	0.8	27			143	8.4	6.4	306	0.8	27			141.5	8.4	0	0	0	0	922.8333475440741
14311471	24774509	30162670	M	73.95580654591871812235	MARRIED	WHITE	Medicare	English	2178-12-22 16:12:00.000000	2178-12-16 02:25:00.000000	2178-12-16 02:26:23.000000	2178-12-21 12:33:58.000000	6.5743055555555556	5.42		0		0	0		81	1	37	7	3	7	3	2178-12-17 08:00:00.000000	3.7	315	1.5	22			126	11.7	3.7	315	1.2	19			128	11.7	1	0	1	1	1225.4991732481867
19986341	25864889	30172818	M	73.1912583529093952	MARRIED	WHITE	Medicare	English	2171-03-29 16:21:00.000000	2171-03-12 08:09:00.000000	2171-03-21 01:35:29.000000	2171-03-24 14:05:13.000000	17.3416666666666667	3.52		0		0	0		79.4	1	34	1	2	5	2	2171-03-22 12:00:00.000000	5.9	177	0.7	11	0.01		132	8.1	5.9	177	0.75	10.5	0.01		133	8.1	0	0	0	0	1344.3000074326992
13534622	22375866	30176383	M	80.08746484066272042463	DIVORCED	WHITE	Medicare	English	2138-02-14 10:48:00.000000	2138-02-01 22:42:00.000000	2138-02-04 09:36:43.000000	2138-02-08 18:04:48.000000	12.5041666666666667	4.35	2138-08-05	0	185	0	1	173	80	1	48	11	2	8	3	2138-02-07 06:00:00.000000	6.8	176	1.4	28			139	11.3	11.875	157.25	1.3	23			137.5	9.463636363636363	1	0	1	1	10781.34805890359
14344105	20603587	30188280	F	79.78242264337373881183	WIDOWED	HISPANIC OR LATINO	Medicare	Spanish	2144-10-27 18:00:00.000000	2144-10-12 18:34:00.000000	2144-10-13 17:15:57.000000	2144-10-17 20:37:32.000000	14.9763888888888889	4.14	2149-03-13	0	1613	0	0	157	112	1	46	2	2	5	1	2144-10-15 15:55:00.000000	9.1	299	1.4	41			141	9.2	9.1	299	1.2666666666666668	43.333333333333336			140	9.2	0	0	1	1	1228.7535012885928
19960105	20844665	30198261	F	66.9457970484105211	MARRIED	WHITE	Private	English	2147-12-29 08:00:00.000000	2147-12-12 16:29:00.000000	2147-12-21 03:54:23.000000	2147-12-29 10:58:24.000000	16.6465277777777778	8.29	2147-12-29	1	17	1	1	163	50.2	1	50	4	3	6	3	2147-12-23 03:37:00.000000	10.6	360	0.8	25		8436	138	8.7	9.899999999999999	370.5	0.7	26.5		8436	132	8.8	0	0	0	0	1149.218085117638
19584206	25736669	30215305	M	38.95465814446312308004	SINGLE	ASIAN	Private	English	2148-12-30 16:31:00.000000	2148-12-14 16:21:00.000000	2148-12-15 10:34:59.000000	2148-12-19 07:31:10.000000	16.0069444444444444	3.87		0		0	0	168	70.4	1	39	6	2	2	1	2148-12-17 05:03:00.000000	4.6	79	1.2	34	0.05		140	16.5	5.7714285714285705	116.77777777777777	0.9714285714285715	22.857142857142858	0.05		136.66666666666666	13.592857142857145	0	0	0	0	1248.6108340024948
18001760	29994129	30222172	M	58.7863331404627313	MARRIED	BLACK/AFRICAN AMERICAN	Medicaid	English	2208-10-31 12:33:00.000000	2208-10-15 20:44:00.000000	2208-10-23 11:28:11.000000	2208-10-27 15:37:20.000000	15.6590277777777778	4.17		0		0	0	180	96.3	1	40	6	4	3	1	2208-10-24 13:52:00.000000	5.2	158	1.4	14			138	8.9	11.675	133	1.3999999999999997	12.666666666666666			136	8.5375	1	0	0	0	9177.902467049658
11470603	21068850	30229137	F	71.60575895190342597815	WIDOWED	WHITE	Medicare	English	2155-08-15 19:40:00.000000	2155-08-10 05:58:00.000000	2155-08-10 05:59:26.000000	2155-08-13 16:55:08.000000	5.5708333333333333	3.46		0		0	0		62	1	38	4	3	4	2	2155-08-13 16:27:00.000000	13.8	236	0.7	12			142	11.2	13.8	236	0.7	16.5			142.5	11.2	0	0	1	1	2056.812162803486
14358282	29784574	30248516	M	35.9265557721547175	SINGLE	BLACK/AFRICAN AMERICAN	Medicaid	English	2188-12-20 14:09:00.000000	2188-12-04 15:03:00.000000	2188-12-06 13:27:34.000000	2188-12-11 17:04:27.000000	15.9625	5.15	2188-12-29	0	25	1	1	178	91.8	1	26	5	1	3	1	2188-12-11 08:38:00.000000	7.2	137	1.2	21			137	11.5	8	169	1.125	25.75			133	11.685714285714285	0	0	0	0	2938.1652194708586
15585184	26897262	30271905	M	43.76350634191394563969	SINGLE	WHITE	Medicaid	English	2135-11-29 13:59:00.000000	2135-10-06 20:45:00.000000	2135-10-06 20:46:29.000000	2135-10-09 21:23:49.000000	53.7180555555555556	3.03		0		0	0		96.8	1	30	0	3	2	1	2135-10-09 05:00:00.000000	17.2	192	0.6	6			127	7.5	26.338461538461534	210.3846153846154	0.9444444444444444	24.88888888888889			133.9047619047619	8.9125	0	0	0	0
11667451	23466313	30296664	M	74.8319665834950222	MARRIED	WHITE	Private	English	2126-11-05 14:40:00.000000	2126-10-31 14:17:00.000000	2126-10-31 14:17:53.000000	2126-11-05 16:12:10.000000	5.0159722222222222	5.08	2126-12-13	0	43	0	1	188	90.1	1	40	2	2	7	1	2126-11-05 14:00:00.000000	7	164	1.3	25			141	11.2	6.85	157	1.3	25			140	10.649999999999999	0	0	1	1	2246.533954039216
12146951	23968046	30297632	M	84.97353261673082504203	MARRIED	ASIAN	Medicare	English	2170-01-15 14:16:00.000000	2169-12-22 13:48:00.000000	2169-12-22 23:31:19.000000	2170-01-06 17:40:20.000000	24.0194444444444444	14.76	2170-02-20	0	60	0	1	157	66	1	164	15	4	8	2	2169-12-25 02:00:00.000000	16	441	2.4	56	0.84		134	12.3	24.099999999999998	387.6666666666667	2.35	48.75	0.84		135.25	10.733333333333334	1	0	1	1	12846.21206568554
10097612	23044352	30298895	M	70.7085439243022434	SINGLE	WHITE	Medicare	English	2159-10-08 17:42:00.000000	2159-09-17 00:00:00.000000	2159-09-23 22:32:49.000000	2159-09-28 15:08:49.000000	21.7375	4.69		0		0	0		98.6	1	30	5	2	4	1	2159-09-25 01:24:00.000000	5.4	140	1.5	42	0.02	25010	130	13.5	5.46	158	1.48	34.2	0.02	25010	131.8	13.52	0	0	1	1	887.0409186128527
19083272	25652021	30299191	M	85.28914429033049016512	MARRIED	WHITE	Medicare	English	2154-05-14 22:05:00.000000	2154-04-16 14:35:00.000000	2154-04-16 15:21:00.000000	2154-04-24 17:12:34.000000	28.3125	8.08	2154-05-14	1	28	1	1	170	65	1	43	11	3	6	2	2154-04-18 19:00:00.000000	9.4	176	1	31			134	10.9	11.75	248.16666666666666	1.0571428571428572	27.857142857142858			140.8	10.387500000000001	1	0	1	1	16586.03522527218
17368229	20006154	30306704	F	71.2064879814844222		UNKNOWN	Medicare	English	2139-03-28 14:50:00.000000	2139-03-17 21:39:00.000000	2139-03-17 23:00:00.000000	2139-03-21 16:31:49.000000	10.7159722222222222	3.73		0		0	0	127	68	1	49	4	3	5	2	2139-03-19 09:00:00.000000	35.4	216	0.9	21	0.2		140	11.4	32.3	211	0.9	18.5	0.16		141.5	11.05	1	0	0	0	4506.8736993530765
11025341	26257315	30318484	M	91.46488203559405666502	SINGLE	WHITE	Medicare	Russian	2135-07-01 19:16:00.000000	2135-06-19 19:04:00.000000	2135-06-19 19:04:33.000000	2135-06-24 22:27:14.000000	12.0083333333333333	5.14	2137-08-19	0	792	0	0	152	59.8	1	38	4	4	10	2	2135-06-20 20:00:00.000000	11.6	226	1.2	24	0.1		140	9.8	12.3	228.5	1.25	22.5	0.085		141.5	9.9	1	0	0	0	1222.8548884093761
11985436	27833593	30320696	F	58.152533191083659	MARRIED	PORTUGUESE	Private	English	2165-03-04 00:35:00.000000	2165-02-24 22:07:00.000000	2165-02-28 18:11:24.000000	2165-03-04 00:37:50.000000	7.1027777777777778	3.27		0		0	0	152	45.7	0	54	8	2	5	0		7.7	33	0.5	32			125	8.6	6.550000000000001	30.5	0.55	32			125.5	8.649999999999999	0	0	0	0	1013.4023400396109
17555267	21215796	30326472	F	59.96715556626382873091	SINGLE	WHITE	Medicaid	English	2128-12-26 00:00:00.000000	2128-12-19 05:54:00.000000	2128-12-19 05:58:08.000000	2128-12-27 00:08:44.000000	6.7541666666666667	7.76	2128-12-26	1	7	1	1	178	104	1	50	13	3	5	3	2128-12-22 16:00:00.000000	9.6	78	1.2	16	0.17		140	9.1	10.35	79.75	1.2	15.666666666666666	0.185		140.33333333333334	8.5	1	1	1	1	3565.5320685207844
11596570	20840530	30326687	F	57.93019186974359161567	SINGLE	WHITE	Medicare	English	2116-12-12 02:15:00.000000	2116-12-05 17:53:00.000000	2116-12-05 20:15:00.000000	2116-12-12 04:15:23.000000	6.3486111111111111	6.33	2116-12-12	1	7	1	1		47	1	21	7	3	3	3	2116-12-07 04:01:00.000000	16.1	331	0.5	10			139	9	15.350000000000001	314.5	0.5666666666666668	11.666666666666666			140.66666666666666	8.95	1	0	0	0	2802.3456554450095
16491463	27983009	30328539	F	74.1248583131184256		UNABLE TO OBTAIN	Medicare	English	2142-02-24 17:00:00.000000	2142-02-15 02:06:00.000000	2142-02-18 12:51:30.000000	2142-02-21 15:59:28.000000	9.6208333333333333	3.13		0		0	0		104.5	1	31	2	3	9	1	2142-02-19 17:25:00.000000	13	341	0.8	17			138	12.4	12.799999999999999	271	0.8666666666666667	15.666666666666666			139	11.633333333333333	0	0	0	0
12860518	27090280	30333885	M	60.40684783422132905489	MARRIED	WHITE	Private	English	2184-06-08 20:15:00.000000	2184-05-28 14:21:00.000000	2184-06-01 12:57:23.000000	2184-06-05 15:07:51.000000	11.2458333333333333	4.09		0		0	0		88.7	1	32	6	2	3	1	2184-06-04 04:00:00.000000	10.8	127	1.4	36	0.04		128	13.4	8.95	97.5	1.1333333333333335	25.5	0.04		134.5	12.816666666666668	0	0	1	1	2709.141703914851
18329161	26660266	30340136	F	69.6946386840019007	SINGLE	WHITE	Medicare	English	2197-09-27 12:30:00.000000	2197-09-11 15:32:00.000000	2197-09-11 17:42:00.000000	2197-09-15 00:16:02.000000	15.8736111111111111	3.27	2200-12-30	0	1205	0	0	152	43.1	1	66	5	3	5	1	2197-09-12 18:00:00.000000	15.5	141	2	129	0.08	11247	141	11.9	12.333333333333334	139.66666666666666	1	86.75	0.08	11247	143.25	11.733333333333334	0	0	0	0	4490.17
14851458	23443034	30340279	F	90.0206010292110741	WIDOWED	WHITE - RUSSIAN	Medicare	Russian	2183-01-18 15:42:00.000000	2183-01-08 11:49:00.000000	2183-01-08 12:57:00.000000	2183-01-13 09:08:25.000000	10.1618055555555556	4.84	2183-01-20	0	12	1	1	155	63	1	32	3	2	8	2	2183-01-09 15:00:00.000000	10.3	245	0.7	17			126	10.3	13.949999999999998	145.33333333333334	0.65	16.25			131.625	10.06	0	0	0	0	868.0000003576279
18367977	26256814	30347748	F	71.99650634982346559876	SINGLE	WHITE	Medicare	English	2114-01-12 16:41:00.000000	2113-12-30 23:11:00.000000	2113-12-30 23:11:57.000000	2114-01-07 16:06:20.000000	12.7291666666666667	7.7		0		0	0	151	88	1	70	8	2	7	2	2114-01-03 08:00:00.000000	30.4	200	1.4	81			136	9.2	28.399999999999995	193.66666666666666	1.4333333333333333	85.66666666666667			138	8.933333333333334	1	0	0	0	2402.499980211258
19167301	22007738	30358483	F	71.81722643252053889385		UNKNOWN	Medicare	English	2132-11-28 06:28:00.000000	2132-10-25 11:39:00.000000	2132-10-28 22:29:10.000000	2132-11-06 18:26:07.000000	33.7840277777777778	8.83	2132-11-28	1	34	0	1		67	1	48	8	3	4	2	2132-10-30 00:12:00.000000	6.1	145	0.8	11			114	8.4	6.533333333333332	137.25	0.875	11.75			125.6	9.275	1	0	1	1	1370.9817709624767
14879136	20527273	30371335	M	45.0212102904071517	MARRIED	WHITE	Private	English	2166-03-06 11:35:00.000000	2166-01-08 23:44:00.000000	2166-01-09 01:01:00.000000	2166-01-14 07:58:11.000000	56.4937	5.29		0		0	0	175	77.8	1	39	7	3	3	2	2166-01-10 15:00:00.000000	9.4	177	1.9	28	0.01		129	9.2	16.014285714285716	119.71428571428571	1.525	19.625	0.01		126.83333333333333	8.821428571428571	0	0	1	1	2428.8759837243706
14706623	23172713	30387219	F	70.5187609250244435	MARRIED	WHITE	Medicare	English	2140-08-10 15:45:00.000000	2140-07-08 17:10:00.000000	2140-07-08 18:12:00.000000	2140-08-10 17:04:58.000000	32.9409722222222222	32.95		0		0	0	163	69.2	1	59	9	3	6	3	2140-07-11 07:00:00.000000	10.8	337	0.6	10			130	8.1	11.333333333333334	324	0.6333333333333333	8.666666666666666			133	8.066666666666666	1	0	1	1	3149.956728428602
12789053	22234196	30389421	M	83.1853052222909742034	MARRIED	WHITE	Medicare	English	2146-04-06 14:16:00.000000	2146-03-09 16:21:00.000000	2146-03-10 14:00:50.000000	2146-03-19 22:00:58.000000	27.9131944444444444	9.33		0		0	0	178	104.6	1	50	11	2	9	3	2146-03-11 20:00:00.000000	7.1	257	1.1	13	0.12		146	10.5	7.8999999999999995	215.5	1.1666666666666667	12.666666666666666	0.12		146.75	10.65	1	0	1	1	2253.6000154316425
15263884	26365458	30397772	M	65.5615075453778286	SINGLE	BLACK/AFRICAN AMERICAN	Medicaid	English	2135-08-03 02:29:00.000000	2135-07-25 13:41:00.000000	2135-07-25 13:42:28.000000	2135-08-04 02:29:32.000000	8.5333333333333333	9.53	2135-08-03	1	9	1	1	173	47.9	1	65	11	4	9	3	2135-07-29 09:00:00.000000	11.8	401	1.4	58	0.5		142	7.8	11.866666666666665	331.3333333333333	1.3999999999999997	58.333333333333336	0.49		145	7.633333333333334	1	0	1	1	1653.2863832302392
13415410	24768641	30412076	F	73.9788386877741333	SINGLE	WHITE	Medicare	English	2158-12-28 14:45:00.000000	2158-12-24 04:12:00.000000	2158-12-24 06:06:00.000000	2158-12-28 15:23:09.000000	4.4395833333333333	4.39	2161-02-18	0	787	0	0	168	118.5	1	47	4	4	5	3	2158-12-25 16:00:00.000000	5.9	249	0.5	17			138	8.3	5.9	249	0.5	17.5			138	8.3	1	0	0	0	2520.7999881729484
19136907	25289494	30416273	F	75.89671710810914407434		UNKNOWN	Medicare	English	2177-12-03 13:20:00.000000	2177-11-24 12:27:00.000000	2177-11-24 12:27:52.000000	2177-11-30 16:44:04.000000	9.0368055555555556	6.18	2178-11-30	0	371	0	0	155	72	1	33	5	4	6	2	2177-11-26 23:00:00.000000	14.6	308	0.8	18	3.1		137	8.5	13.7	309	0.875	18.5	3.09		135	8.45	1	0	1	1	2186.3123705796897
14398569	21441473	30422729	F	77.5767199859575599496	MARRIED	WHITE	Medicare	English	2181-08-07 19:45:00.000000	2181-07-30 15:25:00.000000	2181-07-31 04:13:40.000000	2181-08-03 23:28:08.000000	8.1805555555555556	3.8	2181-08-20	0	21	1	1		38.4	1	42	4	3	4	2	2181-08-01 11:00:00.000000	10.2	191	0.6	16			154	13.4	10.2	191	0.55	16			152	13.4	0	0	1	1	3305.0359575897455
14588438	28160257	30423933	M	57.8826645529995638	SINGLE	WHITE - OTHER EUROPEAN	Medicare	English	2166-12-02 11:37:00.000000	2166-11-19 08:30:00.000000	2166-11-19 15:16:55.000000	2166-11-23 18:57:15.000000	13.1298611111111111	4.15	2166-12-30	0	41	0	1	188	101	1	61	10	3	3	1	2166-11-21 21:45:00.000000	7.2	149	1.7	43			123	10.4	6.95	140	1.6666666666666667	41.666666666666664			127.33333333333333	9.971428571428573	0	0	1	1	2418.2448711544275
14681392	21755296	30425322	M	92.4855485465040226	MARRIED	WHITE	Medicare	English	2125-06-30 15:00:00.000000	2125-06-26 14:02:00.000000	2125-06-26 17:13:00.000000	2125-06-30 15:36:38.000000	4.0402777777777778	3.93		0		0	0		58.6	1	58	6	4	6	3	2125-06-28 20:00:00.000000	2.3	196	0.9	19	0.05		148	13.9	2.3	196	0.9	20	0.05		145.5	13.9	0	0	0	0	1205.1666520684958
17119713	26459514	30426068	M	40.80119444398812598527	SINGLE	WHITE	Private	English	2184-11-20 21:15:00.000000	2184-10-19 15:07:00.000000	2184-10-19 15:08:24.000000	2184-10-30 21:39:24.000000	32.2555555555555556	11.27		0		0	0	180	135	1	59	8	4	2	2	2184-10-20 21:38:00.000000	10.9	415	1.6	77	4.55		142	9.6	13.350000000000001	441.5	1.4666666666666668	73.33333333333333	4.066666666666666		142.33333333333334	9.6	1	0	0	0
11607177	29102942	30446316	M	57.9268276619033104	MARRIED	BLACK/CAPE VERDEAN	Private	Kabuverdianu	2148-12-14 15:00:00.000000	2148-12-04 17:26:00.000000	2148-12-06 13:26:27.000000	2148-12-11 21:56:48.000000	9.8986111111111111	5.35		0		0	0	180	145.8	1	23	2	1	4	2	2148-12-08 00:00:00.000000	8.9	173	1.2	32			135	13.5	8.9	173	1.2	32			135	13.5	0	0	0	0	1922.25
16743520	25961528	30459451	F	80.92754712400727919206		UNABLE TO OBTAIN	Medicare		2185-12-23 11:39:00.000000	2185-12-05 18:42:00.000000	2185-12-05 19:11:24.000000	2185-12-15 21:10:08.000000	17.7063	10.08		0		0	0	165	70	1	51	7	3	6	2	2185-12-06 21:00:00.000000	15	154	0.5	14			132	11	15	154	0.5	14			132	11	1	0	0	0	4909.999950401485
19466510	20716285	30461870	M	88.67614797555836647726	MARRIED	WHITE	Medicare	English	2135-09-21 14:40:00.000000	2135-09-04 22:59:00.000000	2135-09-05 00:55:00.000000	2135-09-14 00:52:00.000000	16.6534722222222222	9		0		0	0	173	75.5	1	74	9	3	6	3	2135-09-06 11:50:00.000000	12.9	186	1.4	62	0.03		141	9.8	12.9	186	1.45	60	0.03		142.5	9.8	0	0	1	1	2546.3727419301867
14622418	29359895	30465776	M	45.4205851493286947	SINGLE	BLACK/AFRICAN AMERICAN	Medicaid	English	2188-06-22 18:06:00.000000	2188-06-03 01:37:00.000000	2188-06-04 15:36:08.000000	2188-06-09 18:38:27.000000	19.6868055555555556	5.13	2189-12-14	0	559	0	0	183	85.6	1	47	6	2	2	1	2188-06-06 14:00:00.000000	5.9	180	1.9	39			132	14	5.933333333333333	174.66666666666666	1.5999999999999999	29.5			135.57142857142858	12.9	0	0	1	1	2768.7331437692046
14861352	29974753	30466234	M	69.0737479838329412	SINGLE	WHITE	Medicare	English	2187-02-11 18:50:00.000000	2187-01-27 15:07:00.000000	2187-01-30 08:38:48.000000	2187-02-07 13:33:22.000000	15.1548611111111111	8.2		0		0	0	173	78.8	1	32	6	3	4	3	2187-01-31 09:00:00.000000	8.1	176	1.3	16			139	14.5	9.075	176.5	1.275	14.5			137	14.049999999999999	0	0	0	0
15641308	23965642	30466667	M	57.72557106734104450687	SINGLE	WHITE	Medicaid	English	2141-10-11 13:43:00.000000	2141-09-23 00:13:00.000000	2141-09-24 23:48:24.000000	2141-09-28 16:27:12.000000	18.5625	3.69		0		0	0	163	63.7	1	31	2	3	4	2	2141-09-26 17:29:00.000000	11.1	167	0.6	8	0.03		128	12.3	9.9	174.14285714285714	0.5833333333333331	6.916666666666667	0.20222222222222222		126.3076923076923	10.914285714285715	0	0	0	0	647.0256112888455
19984218	21448348	30477142	F	88.3303890145285713	WIDOWED	WHITE	Medicare	English	2148-05-07 14:58:00.000000	2148-04-30 21:10:00.000000	2148-04-30 21:11:57.000000	2148-05-06 17:13:08.000000	6.7416666666666667	5.83	2148-05-08	0	8	1	1	157	61.1	1	67	4	3	7	3	2148-05-02 03:18:00.000000	10.1	378	1	41	0.04		137	10.6	10.1	378	1	41	0.04		137	10.6	1	0	0	0
18998398	24184637	30484169	M	65.266514773462222	MARRIED	WHITE	Medicare	English	2137-04-15 15:15:00.000000	2137-04-07 19:50:00.000000	2137-04-07 21:41:00.000000	2137-04-13 18:33:26.000000	7.8090277777777778	5.87	2138-02-02	0	301	0	1	173	100.9	1	45	5	3	5	1	2137-04-09 02:24:00.000000	10.4	149	1.4	57			147	7.9	10.4	151.5	1.35	55			146.5	7.95	1	0	0	0	4705.841930904426
11994791	23904241	30496072	M	43.94309427417681671026		UNKNOWN	Private	English	2156-12-19 00:00:00.000000	2156-12-10 10:59:00.000000	2156-12-10 11:31:05.000000	2156-12-19 00:00:00.000000	8.5423611111111111	8.52	2156-12-19	1	9	1	1	178	75.1	1	46	5	3	4	2	2156-12-11 16:00:00.000000	24.9	309	1.4	23	1.44		142	12	20.4	255.5	1.35	21	1.0666666666666667		144.5	11.1	1	0	0	0	1530.6021602004766
12574665	25787348	30502427	M	63.86883605025343927223	DIVORCED	WHITE	Medicare	English	2139-11-20 15:47:00.000000	2139-11-14 08:03:00.000000	2139-11-14 09:06:00.000000	2139-11-18 01:48:45.000000	6.3222222222222222	3.7		0		0	0		141.7	1	34	6	2	3	1	2139-11-16 00:00:00.000000	8.3	102	1.1	20		1167	143	8.7	8.3	102	1	18.5		1167	144	8.7	0	0	1	1	9472.514089852571
10215345	22129264	30509773	F	91.06769674474579715488	WIDOWED	WHITE	Medicare	English	2135-02-07 05:30:00.000000	2135-01-25 17:25:00.000000	2135-01-25 17:32:00.000000	2135-01-31 14:39:05.000000	12.5034722222222222	5.88	2135-02-07	1	13	1	1	152	53.2	1	28	10	4	5	3	2135-01-27 01:00:00.000000	12.6	313	0.7	18			131	7.2	14.25	352	0.75	18			137.33333333333334	10.233333333333334	1	0	0	0	6268.5241657197475
18295246	24670637	30533063	F	80.69046116456121329602	WIDOWED	WHITE	Medicare	English	2143-10-04 12:45:00.000000	2143-09-10 04:27:00.000000	2143-09-21 10:49:18.000000	2143-09-30 16:28:41.000000	24.3458333333333333	9.24		0		0	0	150	71	1	27	8	3	7	2	2143-09-23 02:02:00.000000	12	220	0.6	15			139	10	17	203.66666666666666	0.7	14			139.66666666666666	8.5625	1	0	1	1	13197.442535255104
16205152	28727183	30534026	M	85.3704290579944256	MARRIED	WHITE	Medicare	English	2130-05-30 15:42:00.000000	2130-05-16 12:09:00.000000	2130-05-16 12:10:49.000000	2130-05-22 16:48:00.000000	14.1479166666666667	6.19	2135-06-17	0	1858	0	0	178	75.1	1	27	3	2	7	1	2130-05-17 13:31:00.000000	8.3	106	1	32			145	8.7	7.475	110	1	32			145	8.2	1	0	0	0	1022.6594893084839
11985436	22717922	30538065	F	58.039790209109455	MARRIED	PORTUGUESE	Private	English	2165-02-11 14:25:00.000000	2165-01-14 17:50:00.000000	2165-01-14 17:52:18.000000	2165-01-31 14:08:22.000000	27.8576388888888889	16.84		0		0	0	150	61.5	1	65	14	2	5	3	2165-01-17 22:00:00.000000	7.2	22	1.4	28			128	7	7.866666666666666	40.333333333333336	1.35	27.5			128	7.140000000000001	0	1	1	1	2430.937677886337
16012257	29797975	30541660	M	78.12349498566855825879	MARRIED	WHITE		English	2133-02-21 18:00:00.000000	2133-02-15 02:32:00.000000	2133-02-15 04:11:00.000000	2133-02-18 22:39:22.000000	6.6444444444444444	3.77	2134-10-30	0	622	0	0	173	64.7	1	33	3	3	6	2	2133-02-16 12:00:00.000000	10.1	135	1.3	31	0.59		139	12.9	10.1	135	1.3	31	0.71		139	12.9	0	0	0	0	1821.7431993745267
13408370	27107260	30547595	M	66.79841470404097374709	MARRIED	UNABLE TO OBTAIN	Private	English	2166-11-13 13:15:00.000000	2166-10-19 14:45:00.000000	2166-10-19 17:00:07.000000	2166-11-13 13:55:59.000000	24.9375	24.87	2174-04-03	0	2723	0	0	173	84.5	1	55	12	4	6	3	2166-10-21 04:00:00.000000	19.3	295	1.1	15	1.14		139	13.3	18.599999999999998	293.3333333333333	1.2666666666666668	17.333333333333332	1.14		139.33333333333334	13.666666666666666	1	0	1	1	2583.774344066158
19265525	22164524	30562009	F	56.21288777182130082399	MARRIED	UNKNOWN	Private	English	2182-03-28 18:14:00.000000	2182-03-19 18:08:00.000000	2182-03-19 18:08:51.000000	2182-03-24 09:20:34.000000	9.0041666666666667	4.63		0		0	0		68.4	1	34	4	3	3	2	2182-03-21 10:00:00.000000	5.8	190	0.4	11	0.08		138	12.7	4.65	174.25	0.44999999999999996	7.5	0.08		140.25	12.549999999999999	1	0	0	0	1954.4690784215927
13537167	26115756	30564760	M	56.2010644084378759	SINGLE	WHITE	Private	English	2167-03-21 15:00:00.000000	2167-03-15 16:18:00.000000	2167-03-15 16:19:35.000000	2167-03-19 17:55:07.000000	5.9458333333333333	4.07		0		0	0	175	76.9	0	78	11	3	6	0		13	146	2	54	0.62		133	12.1	11.1	136.5	1.9	48.5	0.62		134	11.55	1	0	1	1	1145.3573810923845
13917492	21489076	30569323	M	75.8329267535862068	SINGLE	WHITE	Medicare	English	2113-11-28 17:15:00.000000	2113-10-31 22:42:00.000000	2113-11-07 14:27:00.000000	2113-11-10 16:59:49.000000	27.7729166666666667	3.11	2114-02-18	0	110	0	1	163	63	0	34	2	2	9	0		12.5	53	1.2	43	5.24		131	16.2	9.95	89.5	1.0999999999999999	33.25	4.65		133.2	15.899999999999999	0	0	0	0
15813150	22863821	30585380	M	65.41407667914545546362	MARRIED	BLACK/CAPE VERDEAN	Medicare	English	2142-06-17 17:12:00.000000	2142-06-01 05:43:00.000000	2142-06-02 12:40:55.000000	2142-06-11 14:06:12.000000	16.4784722222222222	9.06	2142-07-02	0	31	0	1	165	83.5	1	29	6	4	6	2	2142-06-04 02:08:00.000000	10.8	254	0.7	17			140	13.3	11.5	251	0.8	17			139.66666666666666	12.366666666666667	1	0	1	1	2053.7548601925373
13598803	29517066	30589330	F	65.7467624205321403	MARRIED	WHITE	Private	English	2127-10-05 15:02:00.000000	2127-09-30 11:24:00.000000	2127-09-30 12:52:00.000000	2127-10-05 15:46:49.000000	5.1513888888888889	5.12		0		0	0	157	51	1	33	2	2	4	1	2127-10-04 05:43:00.000000	4.9	241	0.5	13			125	9.3	4.9	241	0.4666666666666666	10			128.33333333333334	9.3	0	0	0	0	2305.6666961610317
11163532	20385530	30590220	F	88.1456693248737975	MARRIED	WHITE - OTHER EUROPEAN	Medicare	English	2135-02-28 17:03:00.000000	2135-02-22 22:20:00.000000	2135-02-22 23:23:00.000000	2135-02-28 17:03:48.000000	5.7798611111111111	5.74	2135-04-25	0	62	0	1	157	90	1	33	3	2	9	1	2135-02-24 11:00:00.000000	4.9	185	1	24	0.04		140	10.5	4.9	185	1	24	0.025		138.5	10.5	0	0	0	0	279.8333333283663
12366309	28182843	30591773	F	52.9912054503893613306		HISPANIC OR LATINO		Spanish	2146-01-27 14:00:00.000000	2145-12-29 00:43:00.000000	2145-12-29 04:20:00.000000	2146-01-18 20:34:15.000000	29.5534722222222222	20.68		0		0	0	157	56.2	1	70	11	4	6	2	2146-01-12 16:37:00.000000	14.9	258	0.9	22	0.96		140	12.5	17.366666666666667	256.6666666666667	0.7333333333333334	16	0.51		139.66666666666666	12.833333333333334	1	0	1	1	4085.7094463184476
14760338	22420207	30608050	M	80.89383469650867704761	MARRIED	WHITE	Medicare	English	2196-12-03 01:37:00.000000	2196-11-22 11:11:00.000000	2196-11-22 12:56:00.000000	2196-12-04 01:37:51.000000	10.6013888888888889	11.53	2196-12-03	1	11	1	1		95	1	37	5	2	6	3	2196-11-24 02:00:00.000000	8.7	350	1.1	25	0.01		136	8.4	9.2	345.3333333333333	1.2000000000000002	26	0.01		136.33333333333334	8.233333333333333	1	0	0	0	1959.5351416170597
16077199	28897898	30625226	F	19.64601764796430251115		UNKNOWN	Private	English	2149-09-03 18:09:00.000000	2149-08-24 22:52:00.000000	2149-08-25 01:31:00.000000	2149-08-30 21:37:20.000000	9.8034722222222222	5.84		0		0	0	157	60.2	1	71	10	3	1	1	2149-08-26 20:00:00.000000	4	121	1.6	22	0.04		135	10.2	16.9	118.5	1.5	20	0.04		133.5	10.2	1	0	1	1	19280.50247533433
15311611	23085350	30631927	F	64.334120178463107261		UNKNOWN	Medicaid	English	2155-06-01 11:00:00.000000	2155-05-03 00:50:00.000000	2155-05-21 08:15:47.000000	2155-05-31 18:10:46.000000	29.4236111111111111	10.41	2155-06-01	1	29	0	1		73.1	1	66	9	2	5	3	2155-05-31 17:00:00.000000	7.4	84	0.6	16	0.08	13445	140	11.9	6.88	77.4	0.4333333333333333	18.833333333333332	0.08	13445	137.16666666666666	9.683333333333334	1	0	1	1	3587.0334293171763
14584705	24500042	30642696	M	67.1430494484935102	SINGLE	WHITE - OTHER EUROPEAN	Medicaid	English	2119-03-09 14:50:00.000000	2119-02-21 22:36:00.000000	2119-02-28 14:31:26.000000	2119-03-03 18:07:11.000000	15.6763888888888889	3.15		0		0	0	170	67	1	41	6	3	4	2	2119-03-02 06:00:00.000000	8.1	99	0.6	14			134	11	8.6	120.66666666666667	0.6499999999999999	13			135.33333333333334	8.857142857142858	1	0	1	1	6335.721306070685
13362979	27912760	30660644	M	94.3680637312612825	MARRIED	ASIAN - KOREAN	Medicare	Korean	2159-06-17 13:00:00.000000	2159-05-15 03:48:00.000000	2159-05-15 04:22:00.000000	2159-05-21 22:16:55.000000	33.3833333333333333	6.75		0		0	0		77	1	46	5	2	6	2	2159-05-16 11:00:00.000000	9.6	262	1.1	22			141	13.2	9.149999999999999	258.5	1.15	20			140.5	13.7	0	0	0	0	1842.8521255627275
14146319	24742465	30673770	M	72.47064685879499071848	MARRIED	WHITE	Medicare	English	2189-07-01 15:59:00.000000	2189-06-21 21:36:00.000000	2189-06-22 00:15:00.000000	2189-06-28 17:04:49.000000	9.7659722222222222	6.7		0		0	0	173	70	0	62	9	3	9	0		14	178	1.8	56	2.6		137	12.6	13.75	176.5	1.542857142857143	39.714285714285715	3.0225		136.875	12.55	0	0	1	1	4200.5749596096575
15450957	23765344	30673992	M	85.28310757738096324568		UNABLE TO OBTAIN	Medicare	English	2167-04-24 16:00:00.000000	2167-04-14 09:40:00.000000	2167-04-14 10:43:00.000000	2167-04-24 18:40:25.000000	10.2638888888888889	10.33	2167-04-24	1	10	1	1	178	76.5	1	60	12	2	5	3	2167-04-20 16:19:00.000000	13.1	104	2.4	53	0.64		130	11.5	13.1	104	2.3	57	0.625		132	11.5	1	1	0	0
17520318	23431795	30682249	F	79.15921711571445172729	MARRIED	WHITE	Medicare	English	2170-03-20 03:30:00.000000	2170-02-28 03:40:00.000000	2170-03-02 10:09:33.000000	2170-03-20 07:44:34.000000	19.9930555555555556	17.9	2170-03-20	1	20	1	1	152	67.9	1	40	16	3	5	3	2170-03-04 15:30:00.000000	14.4	275	0.9	29	2.1		138	8.9	13.600000000000001	253.5	0.8666666666666667	29.333333333333332	2.1		138.33333333333334	8.4	1	1	1	1	2553.0639037936926
15958792	26819382	30687516	M	77.19336494707618510467	MARRIED	WHITE	Medicare	English	2110-03-23 15:26:00.000000	2110-03-12 15:00:00.000000	2110-03-15 10:06:54.000000	2110-03-18 18:04:07.000000	11.0180555555555556	3.33		0		0	0	178	99	1	53	8	3	7	1	2110-03-17 06:00:00.000000	24.8	166	1.1	22			134	13.1	21.35	157.5	1.0333333333333334	20			133.6	10.112499999999999	1	0	1	1	8930.9
17927534	21935666	30688356	M	58.47786429575763770626	SINGLE	UNKNOWN	Medicare	English	2186-07-08 16:00:00.000000	2186-06-24 12:52:00.000000	2186-06-24 15:28:00.000000	2186-06-27 16:41:01.000000	14.1305555555555556	3.05		0		0	0	180	117.5	1	35	5	4	4	1	2186-06-25 21:00:00.000000	4.2	122	1	23	0.01		142	11.9	7.8999999999999995	126.66666666666667	0.9666666666666667	24	0.01		141.33333333333334	11.466666666666667	1	0	1	1	7604.43
13077571	29602112	30689359	F	77.71756838236323071035	WIDOWED	WHITE	Medicare	English	2137-10-03 07:45:00.000000	2137-09-20 02:04:00.000000	2137-09-20 04:04:00.000000	2137-10-03 11:14:08.000000	13.2368055555555556	13.3	2137-10-03	1	13	1	1	157	80	1	88	9	4	5	2	2137-09-21 18:16:00.000000	27	189	1.8	42	0.47		151	11	24.866666666666664	180.33333333333334	1.5333333333333332	32.333333333333336	0.5499999999999999		148	10.9	1	0	1	1	9785.802163287997
18398533	20022560	30689672	F	66.74537909112314574994	MARRIED	ASIAN - ASIAN INDIAN	Medicare	English	2148-10-02 17:45:00.000000	2148-09-29 05:51:00.000000	2148-09-29 08:17:39.000000	2148-10-02 18:07:18.000000	3.4958333333333333	3.41		0		0	0	157	84.5	0	32	1	3	5	0		13.1	331	0.7	12	0.51	802	133	12.1	13.1	326.5	0.7	12	0.5866666666666667	802	134	12.1	0	0	0	0	1340
17846379	28308556	30698945	M	64.33350604987013176652	SINGLE	WHITE	Medicare	English	2185-05-18 14:30:00.000000	2185-05-02 19:27:00.000000	2185-05-02 19:29:24.000000	2185-05-13 17:44:12.000000	15.7937	10.93	2185-07-11	0	70	0	1		78.1	1	57	10	3	4	1	2185-05-05 13:00:00.000000	1.6	11	1.5	35			138	4.3	1.95	20.5	1.35	33.5			136.5	5.3	1	0	0	0	4046.0000046789646
10843788	22294846	30706447	F	83.80985498807791972324	WIDOWED	WHITE	Medicare	English	2130-11-02 14:10:00.000000	2130-10-23 19:02:00.000000	2130-10-23 19:03:48.000000	2130-10-27 13:36:06.000000	9.7972222222222222	3.77	2130-11-02	1	10	1	1		84.8	1	36	11	3	7	2	2130-10-25 05:23:00.000000	13	244	2	32	3.86		133	11.2	14.914285714285715	174.42857142857142	1.7	26.6	3.0549999999999997		132	9.514285714285716	1	0	1	1	2828.1781663410366
11145090	24083487	30723348	F	82.4690031997050357	WIDOWED	WHITE	Medicare	English	2139-06-30 14:30:00.000000	2139-06-21 13:00:00.000000	2139-06-21 12:40:52.000000	2139-06-28 18:00:25.000000	9.0625	7.22	2140-07-11	0	386	0	0	150	43	1	36	5	0	5	2	2139-06-22 18:00:00.000000	4.6	231	1.3	40			135	8.6	5.199999999999999	239.5	1.25	36			136.33333333333334	9.1	1	0	1	1	4817.378822617233
17116333	28885585	30727579	F	73.26005969253870645277	SINGLE	WHITE	Medicare	English	2177-04-18 15:38:00.000000	2177-04-05 23:38:00.000000	2177-04-05 23:40:19.000000	2177-04-09 08:01:05.000000	12.6666666666666667	3.35		0		0	0		75	1	46	6	3	5	1	2177-04-07 08:00:00.000000	8.2	196	0.7	17			140	7.9	9.610000000000001	198.08333333333334	0.7625000000000001	19.125			137.0909090909091	7.8066666666666675	1	0	1	1	2796.353582001291
16387187	26857526	30732138	F	82.85883507068981357261	WIDOWED	WHITE	Medicare	English	2147-12-03 19:10:00.000000	2147-11-10 16:23:00.000000	2147-11-10 16:24:30.000000	2147-12-03 19:23:50.000000	23.1159722222222222	23.12	2147-12-19	0	39	0	1	152	48.8	1	57	10	2	6	3	2147-11-13 18:00:00.000000	11.1	86	1.5	51	0.21		145	8.7	11.5	78.25	1.5333333333333332	55.333333333333336	0.2475		146.33333333333334	8.3	1	0	0	0	1745.124979186803
10804747	23977065	30735662	F	73.83049959570184516932	DIVORCED	OTHER	Medicare	English	2142-11-13 16:15:00.000000	2142-10-31 08:00:00.000000	2142-10-31 17:02:14.000000	2142-11-09 18:11:05.000000	13.3438	9.05	2148-12-15	0	2237	0	0	145	59.8	1	40	5	3	6	2	2142-11-02 01:00:00.000000	9.1	254	0.6	10			140	9	10.64	193.8	0.6	10			141.5	9.585714285714285	1	0	1	1	14122.636616036296
12317110	20726045	30744255	F	53.9460576823037876	SINGLE	BLACK/AFRICAN AMERICAN	Medicaid	English	2159-12-30 15:30:00.000000	2159-12-12 18:00:00.000000	2159-12-22 21:42:54.000000	2159-12-30 15:37:48.000000	17.8958333333333333	7.75		0		0	0		74.5	0	32	6	4	2	0		14.8	404	0.8	16	0.57		145	15.4	19.616666666666664	398.1666666666667	0.78	18.2	0.5566666666666666		141.2	12.6	1	0	0	0	4297.1323510706425
18686090	24854437	30748328	M	27.61211318644746344737	SINGLE	WHITE	Private	English	2131-09-10 12:44:00.000000	2131-08-12 13:40:00.000000	2131-08-17 16:17:43.000000	2131-08-21 13:25:50.000000	28.9611111111111111	3.88		0		0	0	178	76.1	1	50	10	3	1	1	2131-08-19 03:26:00.000000	8.8	243	1.2	32	0.38		139	10.3	10.166666666666666	318.125	1.3	26.285714285714285	0.38		135.08333333333334	8.058823529411764	1	0	1	1	1825.0000309944153
18043915	21872777	30749342	M	60.38754176074432233362	MARRIED	WHITE	Private	English	2161-05-27 16:30:00.000000	2161-05-22 13:07:00.000000	2161-05-22 13:08:22.000000	2161-05-27 17:40:32.000000	5.1409722222222222	5.19		0		0	0	170	87	1	23	1	2	3	2	2161-05-24 08:09:00.000000	6.7	193	0.9	17		4405	138	13.8	7.800000000000001	230.5	0.9	16		4405	138.6	14.7	0	0	0	0	3325.6266828142107
12707710	23334059	30753165	M	67.15118400950602614157	MARRIED	ASIAN - ASIAN INDIAN	Medicare	English	2171-03-14 14:20:00.000000	2171-02-25 05:15:00.000000	2171-03-04 11:50:42.000000	2171-03-12 17:27:47.000000	17.3784722222222222	8.23		0		0	0		75	1	67	5	3	6	3	2171-03-06 04:00:00.000000	11	384	1.4	33	0.33		136	11.2	11.533333333333333	357.6666666666667	1.2	26	0.2333333333333333		135	11.433333333333332	0	0	0	0	1347.8666780292988
14213243	26756328	30756053	M	79.99386160408715317516	WIDOWED	WHITE	Medicare	English	2159-01-26 14:36:00.000000	2158-12-30 00:00:00.000000	2159-01-14 11:35:59.000000	2159-01-19 01:48:36.000000	27.6083333333333333	4.59		0		0	0		84.3	1	33	4	1	6	2	2159-01-17 12:00:00.000000	10.5	57	1.2	55	0.02	1207	142	7.2	10.34	132.8	1.1285714285714286	47.142857142857146	0.02	1207	141.625	8.114285714285716	0	0	0	0	2693.9166823998094
13396234	22890738	30757023	F	73.91366363488682389575	WIDOWED	WHITE	Medicare	English	2185-12-13 13:18:00.000000	2185-11-30 17:00:00.000000	2185-12-06 10:10:17.000000	2185-12-11 15:41:19.000000	12.8458333333333333	5.23		0		0	0	157	50	1	50	8	2	6	2	2185-12-07 13:00:00.000000	9	91	0.6	15			138	8.2	13.966666666666669	120.66666666666667	0.6499999999999999	16.5			136.83333333333334	8.055555555555557	1	0	0	0	5590.64
13981687	22194755	30795469	M	64.88193048870490128615	MARRIED	WHITE	Private	English	2139-12-02 16:09:00.000000	2139-11-19 02:50:00.000000	2139-11-22 05:32:30.000000	2139-11-28 14:11:06.000000	13.5548611111111111	6.36		0		0	0	183	117	1	35	5	2	4	2	2139-11-24 11:00:00.000000	12.1	207	1.1	16			142	15.1	11.066666666666668	212.66666666666666	0.975	17.75			141	13.4	1	0	0	0	2140.5000044852495
19461458	27696762	30803639	M	54.41513571823612837516	SINGLE	WHITE	Medicare	English	2141-06-28 15:00:00.000000	2141-06-01 15:00:00.000000	2141-06-01 15:01:23.000000	2141-06-26 00:14:59.000000	27	24.38		0		0	0	180	229	1	56	6	3	3	3	2141-06-03 01:00:00.000000	4.7	206	0.7	15			141	11.4	4.7	206	0.7	15			141	11.4	1	0	1	1	1865.7621439695358
18075452	24802144	30803697	M	31.904755005661391	SINGLE	WHITE	Medicaid	English	2123-01-04 18:57:00.000000	2122-11-27 16:43:00.000000	2122-11-27 19:47:00.000000	2122-12-05 21:57:24.000000	38.0930555555555556	8.09	2123-01-04	1	38	0	1		54.4	0	55	14	4	3	0		11	29	1.4	32	0.08		132	9	14.375	111.8	1.1599999999999997	25.2	0.12200000000000003		132.8	8.725000000000001	0	0	1	1	5144.337694764137
11144031	21495589	30822633	F	67.01397285148537742708	MARRIED	ASIAN - CHINESE	Medicare	Chinese	2112-01-22 14:35:00.000000	2112-01-06 02:29:00.000000	2112-01-18 14:24:38.000000	2112-01-21 14:33:24.000000	16.5041666666666667	3.01		0		0	0		55	1	43	2	1	5	2	2112-01-20 14:00:00.000000	7.1	92	1	24			139	10.8	9.450000000000001	122.9	0.82	17.6			138	8.4	0	0	1	1	944.0667228102684
14150131	20099208	30831767	F	69.3825973981329882	MARRIED	WHITE	Medicare	English	2147-05-30 14:40:00.000000	2147-05-20 23:35:00.000000	2147-05-20 23:38:05.000000	2147-05-24 19:39:35.000000	9.6284722222222222	3.83	2148-10-06	0	505	0	0	152	70	0	36	5	2	4	0		7.3	217	1.1	19		2407	143	10.1	7.3	217	1.1	19		2407	142.5	10.1	1	0	0	0	1419.1142220795155
16546275	23117852	30839225	M	88.29249062569778697716	MARRIED	WHITE	Medicare	English	2143-04-29 17:25:00.000000	2143-04-17 19:55:00.000000	2143-04-17 20:40:00.000000	2143-04-27 04:24:19.000000	11.8958333333333333	9.32	2143-10-17	0	183	0	1	168	68.1	1	45	6	2	8	2	2143-04-19 01:13:00.000000	9.9	113	1.2	17			134	10.8	9.9	113	1.2	17			134	10.8	1	0	0	0	3029.999997615814
15476958	28973906	30852066	M	43.5146417382934541	SINGLE	WHITE	Medicare	English	2152-07-11 15:58:00.000000	2152-07-07 10:52:00.000000	2152-07-07 12:20:00.000000	2152-07-11 16:28:08.000000	4.2125	4.17		0		0	0		90	1	28	1	3	1	2	2152-07-08 23:00:00.000000	10.2	202	0.2	12			140	15.1	10.2	202	0.2	12			140	15.1	1	0	0	0	710.0000013709068
10621627	23274633	30874363	F	63.79821696604199711728	MARRIED	WHITE	Private	English	2184-11-02 15:52:00.000000	2184-10-18 13:01:00.000000	2184-10-18 13:02:19.000000	2184-10-21 19:08:14.000000	15.1188	3.25		0		0	0	152	102	0	35	6	2	5	0		5.8	103	1.1	34		1264	137	13.4	5.4	97.5	1	31.333333333333332		1264	139	13	0	0	0	0	779.9999999981374
13400185	24625521	30876879	M	72.45457494239739983658		UNKNOWN	Medicare	English	2150-07-14 16:43:00.000000	2150-06-16 00:43:00.000000	2150-06-20 06:10:52.000000	2150-07-14 16:43:15.000000	28.6666666666666667	24.44	2150-11-23	0	160	0	1	183	103	1	44	11	2	7	2	2150-06-21 12:00:00.000000	15.8	230	1	55	0.1		137	7.7	13.299999999999999	179.33333333333334	1.125	56.5	0.13333333333333333		138.25	6.5	1	0	1	1	2018.944714780897
11760589	23522606	30878518	M	92.6418604346950485	WIDOWED	WHITE	Medicare	English	2168-08-31 19:26:00.000000	2168-08-22 16:14:00.000000	2168-08-22 17:16:00.000000	2168-08-25 20:16:11.000000	9.1333333333333333	3.13		0		0	0		66.7	1	66	2	3	7	2	2168-08-24 18:00:00.000000	12.8	336	1.4	72			143	8.2	12.7	330.5	1.35	65.5			142	8.3	0	0	1	1	1434.1171489208937
12358883	26507294	30896654	M	45.01642746453036616818	MARRIED	WHITE	Private	English	2113-01-14 15:30:00.000000	2113-01-07 00:00:00.000000	2113-01-07 18:12:52.000000	2113-01-11 06:45:43.000000	7.6458333333333333	3.52		0		0	0	168	76.3	0	43	3	3	3	0		12.8	256	1.2	33	0.06		135	13.2	10.700000000000001	223.33333333333334	1.225	31	0.075		135.5	12.925	0	0	0	0	2068.7000167518854
15750374	26660725	30912263	F	74.72744387435058277951	MARRIED	WHITE - OTHER EUROPEAN	Medicare	English	2136-11-01 13:16:00.000000	2136-09-22 16:38:00.000000	2136-09-22 18:09:00.000000	2136-11-01 15:27:51.000000	39.8597222222222222	39.89	2136-11-01	1	40	0	1	160	76	1	48	10	3	5	3	2136-09-24 09:00:00.000000	9.1	325	0.7	19	0.9		141	12.3	8.5	309.5	0.8000000000000002	26.666666666666668	0.815		140.66666666666666	11.8	1	1	0	0
19434406	29161038	30912986	F	72.9840859697892843	MARRIED	WHITE	Medicare	English	2126-01-10 19:30:00.000000	2125-12-25 16:07:00.000000	2125-12-25 16:08:15.000000	2126-01-03 21:33:53.000000	16.1409722222222222	9.23		0		0	0		79	1	48	8	3	5	1	2125-12-26 22:00:00.000000	11.8	206	1.2	24			136	8.1	11.8	206	1.2	24			136	8.1	1	0	1	1	7156.676545113325
10745734	21493841	30919467	F	78.66264094916673207231	WIDOWED	WHITE	Medicare	English	2186-09-11 16:30:00.000000	2186-08-31 00:35:00.000000	2186-09-02 14:22:51.000000	2186-09-06 15:32:56.000000	11.6631944444444444	4.05	2187-04-05	0	217	0	1	157	53.7	1	44	8	1	7	2	2186-09-03 20:00:00.000000	11.3	196	0.4	10			136	8.7	10.55	215.5	0.4	10			137	8.35	1	0	1	1	2493.208763420582
11342653	27917922	30935251	M	64.84323468336670542331	MARRIED	BLACK/AFRICAN AMERICAN	Other	English	2113-11-19 15:55:00.000000	2113-11-04 23:38:00.000000	2113-11-04 23:39:05.000000	2113-11-19 17:12:46.000000	14.6784722222222222	14.73	2113-11-19	1	15	1	1	193	174	1	54	12	2	4	3	2113-11-06 04:54:00.000000	6.6	256	5.5	39			131	7.4	7.35	254	5.25	36.5			131	7.550000000000001	1	1	1	1	3006.9
13945948	24549265	30945107	F	91.15241416801889036736	WIDOWED	WHITE	Medicare	Italian	2164-03-10 15:42:00.000000	2164-02-25 16:02:00.000000	2164-02-25 17:04:51.000000	2164-03-06 21:42:09.000000	13.9861111111111111	10.19		0		0	0	163	69.7	1	36	5	2	6	2	2164-02-27 11:00:00.000000	9.9	199	0.8	21	1.95		138	12.3	10.9	200.5	0.9333333333333332	20.333333333333332	2.105		141	13.15	0	0	1	1	4855.07
16308412	24317197	30947718	F	65.1269506853599045	MARRIED	UNABLE TO OBTAIN	Private	English	2112-02-24 19:10:00.000000	2112-02-16 14:38:00.000000	2112-02-16 14:40:44.000000	2112-02-20 13:03:05.000000	8.1888888888888889	3.93	2113-10-16	0	608	0	0	160	103.3	1	51	7	3	7	2	2112-02-17 20:00:00.000000	17.5	335	0.6	11	0.06		141	11.8	17.166666666666668	314.3333333333333	0.6	10.5	0.06		139	11.433333333333332	1	0	0	0	2496.034134313464
13593845	28793290	30979707	M	29.4394965073385135	SINGLE	OTHER	Medicaid	English	2122-06-24 15:00:00.000000	2122-06-10 18:21:00.000000	2122-06-10 23:21:06.000000	2122-06-17 13:23:26.000000	13.8604166666666667	6.58		0		0	0	165	61.1	1	35	6	2	2	2	2122-06-12 00:00:00.000000	8.9	303	0.6	8			140	9.2	9.3	319	0.6499999999999999	7.5			142	9.2	1	0	0	0	1419.0934923700988
17697987	21521647	30992685	F	49.7111696567694235	SINGLE	BLACK/AFRICAN AMERICAN	Medicaid	English	2168-09-22 10:57:00.000000	2168-09-16 23:01:00.000000	2168-09-17 02:59:21.000000	2168-09-20 15:02:55.000000	5.4972222222222222	3.5		0		0	0		128.8	1	16	1	2	3	2	2168-09-18 05:20:00.000000	9.8	341	0.9	7			139	11.9	9.8	341	1	8			139.5	11.9	0	0	0	0	1920
16050606	22167542	30993471	M	79.74721767424824575974	MARRIED	UNKNOWN	Private	English	2113-10-21 17:09:00.000000	2113-09-30 21:58:00.000000	2113-09-30 21:59:13.000000	2113-10-11 18:20:16.000000	20.7993055555555556	10.85	2114-05-14	0	226	0	1	178	98	1	54	10	3	8	2	2113-10-01 23:00:00.000000	14	223	1.8	49	5.64		139	10.4	15.02	226.4	1.5875000000000001	48.25	6.1049999999999995		140.33333333333334	10.716666666666669	1	0	1	1	2466.34
14491891	23556297	31000265	M	75.0388074512545411	MARRIED	WHITE	Medicare	English	2151-01-23 12:40:00.000000	2151-01-14 20:04:00.000000	2151-01-14 20:06:06.000000	2151-01-18 00:26:25.000000	8.6916666666666667	3.18	2151-05-13	0	119	0	1	173	76.5	1	42	3	2	6	2	2151-01-16 18:39:00.000000	7.3	180	1.2	25			139	11.1	7.3	180	1.2	25			139	11.1	0	0	0	0
16442524	21944527	31019287	F	51.2233365518995321	DIVORCED	BLACK/AFRICAN	Medicare	English	2137-03-31 16:36:00.000000	2137-03-22 19:32:00.000000	2137-03-22 21:32:00.000000	2137-03-27 12:59:53.000000	8.8777777777777778	4.64		0		0	0	170	80.8	1	54	2	4	3	3	2137-03-24 12:00:00.000000	23.1	119	0.9	26	0.05		135	10.5	23.1	119	0.9	26	0.05000000000000001		135	10.5	0	0	0	0	2963.6774784848094
10703413	21797485	31020682	M	61.7436585423728195	MARRIED	WHITE	Private	English	2140-10-22 18:00:00.000000	2140-09-28 14:00:00.000000	2140-09-28 19:36:20.000000	2140-10-09 15:45:59.000000	24.1666666666666667	10.84		0		0	0	173	100	1	49	6	3	7	2	2140-09-30 16:20:00.000000	14.5	241	1.3	44			124	9.9	19.03333333333333	227.66666666666666	1.2	39.25			126.25	9.966666666666667	1	0	0	0
13610988	22096604	31033215	F	93.9819634805294998	WIDOWED	WHITE	Medicare	English	2148-01-16 10:16:00.000000	2147-12-26 01:47:00.000000	2147-12-26 04:18:00.000000	2147-12-30 11:52:56.000000	21.3534722222222222	4.32	2148-01-16	1	21	1	1	163	53.6	1	55	10	3	6	3	2147-12-27 13:35:00.000000	14.5	196	1.5	63		18767	154	9.6	9.925	165.25	1.2	58		18767	149.4	9.274999999999999	1	0	1	1	4337.292862920091
19756673	21095142	31035340	M	57.35861687441325051458	MARRIED	UNKNOWN	Medicaid	English	2133-06-14 14:00:00.000000	2133-05-11 23:34:00.000000	2133-05-11 23:34:56.000000	2133-06-03 14:19:51.000000	33.6013888888888889	22.61		0		0	0	175	83	1	21	9	3	5	2	2133-05-15 02:00:00.000000	12.1	185	0.7	6			138	12.4	11.7	210.5	0.6	13.833333333333334			141.66666666666666	11.4	1	0	1	1	3328.8197651468217
15974795	28739310	31035796	F	91.39884324791660202155	WIDOWED	WHITE	Medicare	English	2142-06-17 16:13:00.000000	2142-05-26 16:11:00.000000	2142-06-11 09:35:00.000000	2142-06-14 11:41:20.000000	22.0013888888888889	3.09		0		0	0	152	39.2	1	34	4	3	5	1	2142-06-13 04:47:00.000000	6.2	261	1	44	0.04	3815	128	10.9	8.266666666666667	277.8333333333333	0.7714285714285715	23.285714285714285	0.04	3815	129.7	10.75	0	0	0	0	3977.833335354924
12404964	21907911	31038553	F	75.70495878227464408681	SINGLE	WHITE	Medicare	English	2152-09-19 16:00:00.000000	2152-09-14 11:32:00.000000	2152-09-14 19:57:06.000000	2152-09-18 10:11:49.000000	5.1861111111111111	3.59	2158-02-17	0	1982	0	0		49.9	1	39	5	0	7	2	2152-09-15 23:00:00.000000	7.4	331	0.6	11	0.03		131	9.8	7.128571428571428	286.14285714285717	0.5714285714285714	13.142857142857142	0.045		133	8.866666666666667	1	0	1	1	2540.8429697370157
14052166	23467979	31042340	F	84.7549807920349917163	WIDOWED	WHITE	Medicare	English	2143-10-22 13:30:00.000000	2143-10-03 18:01:00.000000	2143-10-17 09:19:22.000000	2143-10-20 10:40:50.000000	18.8118055555555556	3.06		0		0	0	155	66	0	22	7	2	8	0		5.7	221	0.6	11			138	12.7	11.45	155	0.6499999999999999	11.5			136.14285714285714	9.73	0	0	1	1	8782.291834803298
17625163	26044044	31042398	M	83.2438053248105214	MARRIED	WHITE	Medicare	English	2167-04-16 11:02:00.000000	2167-03-31 12:46:00.000000	2167-03-31 18:05:23.000000	2167-04-05 01:49:52.000000	15.9277777777777778	4.32	2167-05-09	0	39	0	1	168	83.1	1	30	5	2	7	3	2167-04-04 23:00:00.000000	7.4	160	0.6	10			140	12.7	7.9	163	0.6666666666666666	11			138	12.75	1	0	0	0
15198026	20281754	31042481	F	60.96302018022753863648	DIVORCED	WHITE	Medicare	English	2124-03-05 18:45:00.000000	2123-12-18 17:39:00.000000	2124-02-15 08:28:56.000000	2124-02-20 20:49:55.000000	78.0458333333333333	5.51	2124-03-05	1	78	0	1		61	1	77	12	4	7	1	2124-02-20 04:44:00.000000	0.4	42	0.5	17	0.2		138	9.6	9.966666666666667	77.66666666666667	0.6058823529411764	13.411764705882353	0.23625000000000002		131.31578947368422	9.475000000000001	1	0	1	1	7365.6073876349255
17225209	21941381	31050465	F	84.99019584579843257651	MARRIED	WHITE	Private	English	2141-01-07 02:35:00.000000	2140-12-27 15:52:00.000000	2140-12-27 15:53:46.000000	2141-01-07 08:00:08.000000	10.4465277777777778	10.67	2141-01-07	1	11	1	1	155	52.4	1	42	12	2	7	3	2140-12-28 20:00:00.000000	4.9	231	1.1	50			140	11.1	4.9	231	1.1	50			140	11.1	1	1	1	1	180
16199928	24477035	31069620	M	58.9289788231729465213	SINGLE	WHITE	Private	English	2167-12-10 15:10:00.000000	2167-12-06 07:15:00.000000	2167-12-06 14:38:03.000000	2167-12-10 15:17:50.000000	4.3298611111111111	4.03		0		0	0	188	100	0	18	1	2	3	0		8.6	197	0.9	17			136	14.1	8.700000000000001	189	0.9	18			136	14.025	0	0	1	1	2744.833131223917
17608002	27322366	31096773	F	75.6708187083267167	MARRIED	BLACK/AFRICAN AMERICAN	Medicare	English	2145-09-28 16:00:00.000000	2145-09-02 23:30:00.000000	2145-09-03 00:56:00.000000	2145-09-12 20:46:13.000000	25.6875	9.83	2146-01-13	0	133	0	1	160	99	1	27	3	1	6	2	2145-09-04 13:14:00.000000	6.4	228	1.4	42			143	12.5	6.4	228	1.3666666666666665	37.666666666666664			141.75	12.5	0	0	0	0	1060.5833327546716
10703413	20953024	31102305	M	61.2831115321409428	MARRIED	WHITE	Private	English	2140-04-23 16:45:00.000000	2140-04-13 08:56:00.000000	2140-04-13 09:58:00.000000	2140-04-16 18:32:21.000000	10.3256944444444444	3.36		0		0	0	173	117.6	1	54	3	4	7	1	2140-04-15 21:47:00.000000	11.7	240	2.7	75			128	8.7	11.7	240	2.6500000000000004	74.5			131	8.7	0	0	0	0
11109872	25743154	31110751	M	54.73818827273728407771	SINGLE	WHITE		English	2167-10-05 15:22:00.000000	2167-09-27 14:49:00.000000	2167-09-27 20:52:27.000000	2167-10-04 20:44:26.000000	8.0229166666666667	6.99		0		0	0	175	166	1	20	7	3	2	3	2167-10-01 08:53:00.000000	14.1	177	1.3	18			142	17.1	14.1	177	1.2000000000000002	17.5			142.5	17.1	1	0	0	0	962.0762385725975
11041607	25537322	31124674	M	66.3342570740008603124	SINGLE	WHITE	Medicare	English	2167-05-14 04:00:00.000000	2167-05-03 02:02:00.000000	2167-05-03 03:09:00.000000	2167-05-14 07:22:01.000000	11.0819444444444444	11.18	2167-05-14	1	11	1	1	180	97	1	110	11	4	10	2	2167-05-04 14:00:00.000000	22.7	639	0.9	23	0.06		138	13.5	20.575	532	0.95	23	0.05		139	11.025	1	0	1	1	4083.144489236176
19043733	25656242	31132456	M	65.75148615316846243191		UNKNOWN	Medicaid	English	2176-10-29 18:27:00.000000	2176-10-01 11:23:00.000000	2176-10-01 11:24:06.000000	2176-10-19 18:29:08.000000	28.2944444444444444	18.3		0		0	0	175	93.7	1	34	7	3	5	3	2176-10-02 14:00:00.000000	8.1	211	1	21			142	13	10.633333333333333	242.66666666666666	0.9	19.666666666666668			141.33333333333334	13.200000000000001	1	0	0	0	1473.5331606855616
14325448	25619680	31141224	M	60.00772128859465474641	SINGLE	WHITE	Medicare	English	2143-01-08 15:40:00.000000	2143-01-03 19:41:00.000000	2143-01-03 19:42:28.000000	2143-01-08 15:57:45.000000	4.8326388888888889	4.84	2143-04-30	0	117	0	1		130.3	1	33	3	3	6	2	2143-01-05 09:00:00.000000	20	221	1.2	19	1.15		141	15.7	17.2	202.5	1.1333333333333335	20	1.1		140.33333333333334	15.399999999999999	0	0	0	0	1609.999998807907
12134620	25109179	31156233	M	72.76887378779001319673	MARRIED	UNKNOWN	Medicare	English	2124-11-16 11:40:00.000000	2124-10-07 19:48:00.000000	2124-10-20 22:20:21.000000	2124-11-03 05:14:03.000000	39.6611111111111111	13.29		0		0	0	180	92.8	1	71	8	3	6	2	2124-10-22 11:00:00.000000	17.6	399	0.9	59	0.42		144	8	18.36666666666667	408.6666666666667	0.8500000000000001	57.5	0.42		144.5	7.4	1	0	1	1	1623.0740852691233
17043686	21381298	31167910	F	89.28328059813006779675	WIDOWED	WHITE	Medicare	English	2162-05-08 16:09:00.000000	2162-04-14 11:11:00.000000	2162-05-02 17:37:21.000000	2162-05-06 13:21:41.000000	24.2069444444444444	3.82	2165-10-15	0	1280	0	0	163	66.3	1	50	2	2	6	1	2162-05-04 00:00:00.000000	20.5	206	0.8	18	0.15		138	11.4	20.400000000000002	244	0.975	21.875	0.20333333333333334		133.625	9.57143	0	0	0	0	1445
15073802	25061315	31174058	M	51.73002587629875838789	DIVORCED	WHITE	Medicaid	English	2142-10-08 18:30:00.000000	2142-09-24 15:16:00.000000	2142-09-30 09:01:32.000000	2142-10-04 16:08:02.000000	14.1347222222222222	4.3		0		0	0	180	101	1	33	7	2	4	2	2142-10-02 20:00:00.000000	9.8	207	1.2	20			137	13.7	9.45	193	1.15	17.5			140	13.700000000000001	1	0	1	1	3987.2229542285204
14134339	23324154	31176808	F	58.3860211555321921	MARRIED	WHITE	Other	English	2157-06-16 13:39:00.000000	2157-05-21 21:29:00.000000	2157-05-24 21:51:36.000000	2157-06-02 17:52:15.000000	25.6736111111111111	8.83	2157-07-06	0	46	0	1	152	47.6	1	49	12	3	5	3	2157-05-27 06:00:00.000000	7.3	266	0.3	22			124	9.5	7.3	266	0.26666666666666666	19.666666666666668			123	9.5	1	0	1	1	2383.550003133714
10531372	23229082	31189292	F	86.84293807636824047861	WIDOWED	BLACK/AFRICAN AMERICAN	Medicare	English	2114-11-17 17:10:00.000000	2114-11-04 21:02:00.000000	2114-11-04 23:00:00.000000	2114-11-11 22:20:48.000000	12.8388888888888889	6.97	2115-10-08	0	338	0	1	163	59	1	37	6	3	6	2	2114-11-06 00:00:00.000000	13.5	135	1.7	26	0.05		141	8.4	13.5	152	1.7	26	0.05		141	8.4	1	0	0	0	2613.45
13415837	26231045	31196635	F	88.38225226927169748642	WIDOWED	WHITE	Medicare	English	2145-06-02 11:58:00.000000	2145-05-20 14:45:00.000000	2145-05-26 08:56:33.000000	2145-05-29 12:59:55.000000	12.8840277777777778	3.17		0		0	0	165	67.8	1	24	4	1	6	1	2145-05-27 17:00:00.000000	6.9	211	0.5	9			132	10.5	7.35	188.25	0.55	12.5			134.5	8.8	1	0	1	1	9650.567781379446
10259507	21201144	31215772	F	82.4423336673584455	MARRIED	BLACK/AFRICAN AMERICAN	Medicare	English	2159-06-21 16:53:00.000000	2159-06-11 05:18:00.000000	2159-06-11 14:34:58.000000	2159-06-14 16:58:40.000000	10.4826388888888889	3.1		0		0	0		95	1	48	4	2	6	1	2159-06-13 02:06:00.000000	6.9	163	0.8	16			148	12.4	6.9	163	0.75	17.25			147	12.4	1	0	0	0
17444849	25332191	31218133	F	71.1727414061544583	SINGLE	BLACK/AFRICAN	Medicare	English	2183-05-20 12:11:00.000000	2183-03-05 01:27:00.000000	2183-03-20 12:07:46.000000	2183-03-26 23:12:33.000000	76.4472222222222222	6.46	2183-06-02	0	89	0	1	157	65	1	56	4	3	5	1	2183-03-22 02:00:00.000000	7.4	309	0.4	11	0.02		137	10.7	9.375000000000002	384.25	0.42500000000000004	16.666666666666668	0.049999999999999996		136.83333333333334	8.058333333333334	1	0	0	0	3069.5000027269125
19049931	27237047	31224059	M	62.0130451560578709	MARRIED	WHITE	Medicare	English	2193-01-10 18:10:00.000000	2193-01-05 17:35:00.000000	2193-01-05 17:36:36.000000	2193-01-10 18:32:44.000000	5.0243055555555556	5.04	2199-10-17	0	2476	0	0	170	86.1	1	46	2	2	5	2	2193-01-07 00:00:00.000000	5.7	161	1.6	33			146	10	5.966666666666666	165.33333333333334	1.6	32			144	10.35	0	0	0	0	867.8636784255505
14187001	24517170	31261246	M	91.2517653440124021	WIDOWED	WHITE	Medicare	English	2171-04-10 17:10:00.000000	2171-04-03 03:58:00.000000	2171-04-03 03:59:59.000000	2171-04-06 18:23:58.000000	7.55	3.6	2173-01-26	0	664	0	0		66	1	46	8	3	8	1	2171-04-06 15:00:00.000000	30.7	340	0.9	15	0.67		139	11.4	24.35	307	0.8	14	0.52		137.5	9.95	1	0	1	1	7183.283390168101
10018328	23786647	31269608	F	83.30975467406997734835	DIVORCED	WHITE	Medicare	English	2154-05-03 14:00:00.000000	2154-04-24 03:15:00.000000	2154-04-24 23:03:44.000000	2154-05-02 15:55:21.000000	9.4479166666666667	7.7	2158-12-14	0	1695	0	0		59.8	1	34	4	3	6	3	2154-04-29 04:25:00.000000	17.8	200	0.6	9			140	8.8	17.450000000000003	206	0.6499999999999999	9			139.5	8.9	0	0	0	0	2044.833346068859
19454196	20134240	31274824	M	61.53577681220791815959		UNKNOWN	Private	English	2179-08-28 12:05:00.000000	2179-07-15 16:31:00.000000	2179-07-15 17:45:00.000000	2179-08-11 21:20:49.000000	43.8152777777777778	27.15		0		0	0	183	181	1	60	14	2	3	3	2179-07-18 16:00:00.000000	6.6	152	15.3	160	1.12		119	9	7.250000000000001	177.33333333333334	10.057142857142855	123.14285714285714	1.07		127.2	8.450000000000001	1	0	1	1	6791.728437453508
13333170	23201677	31275723	F	70.8602052429165686	MARRIED	WHITE	Medicare	English	2151-11-29 17:40:00.000000	2151-11-10 21:03:00.000000	2151-11-10 22:22:25.000000	2151-11-17 17:54:10.000000	18.8590277777777778	6.81	2151-11-29	1	19	1	1		75.8	1	56	9	2	12	2	2151-11-16 02:00:00.000000	5.4	117	2.8	41	0.04		129	7.2	6.1	121.25	2.4833333333333334	37	0.04		130	7.375	0	0	1	1	2690.656186878681
17244595	26597499	31277417	M	62.16701255605872270987	MARRIED	PATIENT DECLINED TO ANSWER	Medicaid	Arabic	2149-03-09 19:32:00.000000	2149-03-03 00:00:00.000000	2149-03-03 15:33:39.000000	2149-03-07 09:56:29.000000	6.8138888888888889	3.77	2152-01-18	0	1051	0	0	165	60	1	25	5	2	5	2	2149-03-06 00:00:00.000000	8.2	229	0.8	8	0.14		139	10.4	7.699999999999999	221	0.8	7.5	0.12000000000000001		138.5	10.45	0	0	1	1	2483.831235129386
16716950	23945318	31289872	M	73.82089979611691243979	MARRIED	WHITE	Medicare	English	2151-11-08 16:30:00.000000	2151-10-27 19:51:00.000000	2151-10-27 20:22:00.000000	2151-11-05 00:08:11.000000	11.8604166666666667	8.16		0		0	0	183	103.6	1	54	2	3	5	1	2151-10-28 22:00:00.000000	11	157	1.2	32	0.18		139	13.8	12.4	170	1.2	32	0.18		137.5	14.05	0	0	0	0	2702.85
14411780	24525592	31289931	F	70.90287170332729167693	MARRIED	WHITE	Medicare	English	2139-01-06 16:10:00.000000	2138-11-26 18:24:00.000000	2138-11-26 18:24:56.000000	2138-12-03 12:37:49.000000	40.9069444444444444	6.76	2139-01-06	1	41	0	1		88.3	1	49	5	3	4	3	2138-11-29 11:58:00.000000	20.2	486	0.7	45	0.02		138	11.4	16.36	337.8	0.7285714285714286	34.857142857142854	0.02		139.14285714285714	9.780000000000001	0	0	1	1	1048.1080184038728
12211707	26734110	31297812	M	48.18335065822416674728	MARRIED	WHITE - OTHER EUROPEAN	Private	English	2154-03-14 14:00:00.000000	2154-03-08 23:13:00.000000	2154-03-09 00:14:00.000000	2154-03-12 17:27:30.000000	5.6159722222222222	3.72		0		0	0	170	157.9	1	23	4	1	2	2	2154-03-10 10:49:00.000000	9.3	201	0.9	12			140	16.4	9.3	201	0.9	12.5			137.5	16.4	0	0	0	0
14323503	23617060	31311435	M	59.4657548207003089		WHITE	Private	English	2182-07-01 19:37:00.000000	2182-06-19 14:20:00.000000	2182-06-19 14:21:38.000000	2182-06-24 13:57:09.000000	12.2201388888888889	4.98		0		0	0	183	80	1	23	5	2	4	1	2182-06-20 18:00:00.000000	15.1	204	1.3	42	0.02		138	13.7	13	183	1.25	40.5	0.02		138.33333333333334	12.766666666666666	0	0	1	1	3274.366660051048
14755254	28933877	31329733	M	71.3242897098970606	MARRIED	WHITE	Medicare	English	2195-05-31 11:05:00.000000	2195-04-29 14:56:00.000000	2195-04-29 21:24:46.000000	2195-05-12 20:35:07.000000	31.8395833333333333	12.97	2195-06-18	0	50	0	1		81.6	1	36	7	3	10	1	2195-05-09 11:47:00.000000	6.1	101	1.2	28			138	8.1	6.933333333333334	115.83333333333333	1.15	27.333333333333332			143	8.033333333333333	0	0	0	0	7142.5
14133567	22909169	31348343	F	72.72296054548917034611	WIDOWED	WHITE	Medicare	English	2132-10-01 14:27:00.000000	2132-09-21 01:20:00.000000	2132-09-21 01:57:00.000000	2132-09-26 15:54:38.000000	10.5465277777777778	5.58		0		0	0	168	75	1	54	4	4	5	1	2132-09-22 20:54:00.000000	38.8	254	0.7	15			139	12.4	38.8	254	0.7	15			138.5	12.4	1	0	1	1	7714.126555925235
14594997	27381409	31351533	M	22.93028693608925345692	SINGLE	BLACK/AFRICAN AMERICAN	Medicaid	English	2140-01-10 18:41:00.000000	2139-12-06 18:43:00.000000	2139-12-07 17:26:01.000000	2139-12-13 20:40:41.000000	34.9986111111111111	6.14		0		0	0	175	68	0	16	4	2	8	0		1.7	101	0.6	5			146	9.4	4.666666666666667	211.33333333333334	0.5	8.333333333333334			144.66666666666666	8.6	0	0	0	0
17638202	21206625	31378564	M	59.84282779940727274276	SINGLE	WHITE	Medicaid	English	2187-11-14 14:42:00.000000	2187-11-04 20:04:00.000000	2187-11-04 21:00:00.000000	2187-11-11 10:58:36.000000	9.7763888888888889	6.58	2188-10-19	0	350	0	1	173	127	1	46	8	4	4	2	2187-11-05 22:00:00.000000	22	261	1.4	19	0.53		141	16.4	21.066666666666666	232.66666666666666	1.3999999999999997	24.666666666666668	2.475		141	16	1	0	1	1	3466.866050082259
14498219	22382612	31404518	M	89.69606437497452221936		UNKNOWN	Medicare	English	2147-09-27 19:30:00.000000	2147-09-12 05:34:00.000000	2147-09-12 06:11:00.000000	2147-09-17 16:49:06.000000	15.5805555555555556	5.44		0		0	0		65	1	44	5	2	7	2	2147-09-14 14:46:00.000000	9.8	123	1	25	3.51		141	7.6	10.142857142857142	131	1.075	33	2.7325		140.25	9.285714285714286	0	0	0	0	3884.999948620796
13859109	24097607	31406735	M	69.15546579771463547152		UNKNOWN	Medicare	English	2120-03-14 22:25:00.000000	2120-02-26 18:47:00.000000	2120-02-26 19:54:00.000000	2120-03-04 21:47:23.000000	17.1513888888888889	7.08	2120-03-15	0	18	1	1		66.4	0	37	8	2	3	0		7.7	52	1	38			136	11.5	5.716666666666668	69.5	0.8500000000000001	23.625			137.75	10.216666666666667	0	0	1	1	2713.549830686301
16431163	24977987	31416245	M	79.12529744358230676891	MARRIED	WHITE	Medicare	English	2126-02-20 17:20:00.000000	2126-02-15 18:20:00.000000	2126-02-15 19:10:49.000000	2126-02-20 19:15:07.000000	4.9583333333333333	5	2126-02-20	1	5	1	1	178	89.7	1	49	7	3	4	2	2126-02-18 12:00:00.000000	57.9	411	3.3	79	0.09		144	9.7	56.65	386.5	3.0333333333333337	74.66666666666667	0.095		145.66666666666666	9.5	1	0	0	0	777.9506056755781
11420535	21376461	31417768	M	68.92303527524216820629	MARRIED	PATIENT DECLINED TO ANSWER	Private	English	2131-12-22 16:45:00.000000	2131-12-04 03:09:00.000000	2131-12-04 03:59:00.000000	2131-12-08 18:35:09.000000	18.5666666666666667	4.61	2132-02-02	0	60	0	1		88.6	1	25	5	2	4	2	2131-12-07 12:32:00.000000	9.1	109	1.2	18			141	13.6	9.7	116	1.1	17			141	13.45	0	0	0	0	1986.6666394472122
19456433	28924889	31435957	F	75.04405184325278399892	DIVORCED	WHITE	Medicare	English	2140-02-07 16:08:00.000000	2140-01-17 02:09:00.000000	2140-01-17 02:09:59.000000	2140-01-30 17:46:22.000000	21.5826388888888889	13.65	2140-03-18	0	61	0	1	157	90	1	51	9	3	8	2	2140-01-22 19:00:00.000000	13.2	287	0.6	19			120	13.9	13.2	287	0.6666666666666666	18			121.4	13.9	1	0	1	1	2480.3031660094857
13233424	26984161	31438182	F	57.743177430610694	SINGLE	BLACK/AFRICAN AMERICAN	Medicaid	English	2201-10-06 14:15:00.000000	2201-09-29 22:10:00.000000	2201-09-29 22:29:32.000000	2201-10-04 01:11:20.000000	6.6701388888888889	4.11		0		0	0	165	88.9	1	20	2	4	3	2	2201-10-04 00:20:00.000000	11.4	367	1	14	0.05		140	11.1	11.4	367	1	13	0.05		140	11.1	0	0	0	0	1060.508198902011
18486555	29674405	31441718	M	48.18042071345086879993	SINGLE	WHITE	Medicaid	English	2146-07-01 13:15:00.000000	2146-03-07 21:32:00.000000	2146-03-08 17:29:04.000000	2146-04-17 13:47:35.000000	115.6548611111111111	39.85		0		0	0	183	114	1	65	13	3	5	3	2146-03-13 15:01:00.000000	27.3	168	1.5	50	5.8		129	10.6	27.3	168	1.5	48	5.9		129	10.633333333333333	1	0	1	1	1276.1476048082113
19380483	26371244	31445811	F	54.77454544597219864577	DIVORCED	UNABLE TO OBTAIN	Private	English	2184-12-01 10:15:00.000000	2184-10-09 21:31:00.000000	2184-10-10 00:53:19.000000	2184-11-06 20:51:35.000000	52.5305555555555556	27.83		0		0	0	160	73	1	29	4	2	6	2	2184-10-12 15:14:00.000000	16	307	0.8	30			137	7.3	11.049999999999999	295.1666666666667	0.6799999999999999	25			137.6	7.183333333333334	1	0	0	0
11532808	23273569	31447880	M	68.8775047320224217	MARRIED	WHITE	Medicare	English	2181-01-11 13:27:00.000000	2180-11-16 21:21:00.000000	2180-11-17 23:38:47.000000	2180-12-11 17:46:10.000000	55.6708333333333333	23.76	2181-01-11	1	56	0	1	184	143	1	38	7	3	9	3	2180-11-19 03:04:00.000000	14.9	331	1.3	31	0.04	2071	135	11.7	11.166666666666666	259.3333333333333	1.5	38.2	0.04	2071	135.6	10.466666666666667	1	0	0	0
13517843	21504832	31468857	F	69.37264486437911180958		UNKNOWN	Medicare	English	2113-05-31 17:46:00.000000	2113-05-17 02:32:00.000000	2113-05-17 03:42:00.000000	2113-05-21 17:43:59.000000	14.6347222222222222	4.58	2113-06-08	0	22	1	1		59.6	1	49	5	2	7	2	2113-05-18 18:00:00.000000			0.9	24	0.57		136				0.9	22.5	0.6679999999999999		137		0	0	0	0	2156.664548780769
11264889	21417480	31473180	F	86.35602346450359548525	MARRIED	WHITE	Medicare	English	2153-05-30 18:00:00.000000	2153-05-11 00:50:00.000000	2153-05-14 18:50:55.000000	2153-05-19 22:13:58.000000	19.7152777777777778	5.14	2154-10-14	0	521	0	0		56.8	0	38	4	1	6	0		7.9	220	0.8	16		5112	132	11.5	8.1	236.33333333333334	0.6000000000000001	14.5		5112	121	11.1	0	0	0	0	1201.249999254942
12662353	29994603	31480445	M	76.32764235766970939815	MARRIED	WHITE	Medicare	English	2160-05-19 16:12:00.000000	2160-04-29 16:03:00.000000	2160-05-12 10:01:43.000000	2160-05-16 21:01:59.000000	20.0063	4.46		0		0	0		74.2	1	52	6	3	5	1	2160-05-15 20:53:00.000000	7.6	207	1.4	34			135	12.8	9.866666666666667	178.85714285714286	1.2166666666666666	25.666666666666668			131.88888888888889	10.633333333333335	1	0	1	1	7938.060550486669
16257968	26796133	31483710	F	88.86198556938504699167	WIDOWED	WHITE	Medicare		2189-11-24 17:10:00.000000	2189-11-11 20:00:00.000000	2189-11-11 21:05:31.000000	2189-11-16 18:27:20.000000	12.8819444444444444	4.89		0		0	0	157	55	1	39	7	3	6	1	2189-11-14 00:00:00.000000	31.4	174	0.6	16			138	11.3	33	187.5	0.5	15.5			137	11.2	1	0	0	0	9894.5
14513402	28184832	31485023	M	82.4131120219227556	SINGLE	WHITE	Medicare	English	2167-06-09 20:34:00.000000	2167-05-31 13:55:00.000000	2167-05-31 15:21:00.000000	2167-06-06 14:29:18.000000	9.2770833333333333	5.96		0		0	0	183	78	1	55	4	3	7	2	2167-06-04 20:00:00.000000	23.1	251	1	32	0.19		135	10.3	23.1	264	1.05	33.5	0.19		134.5	10.25	0	0	1	1	4094.55
18052788	27948609	31486653	F	95.0581057673177418	WIDOWED	WHITE	Medicare	English	2148-01-30 14:02:00.000000	2148-01-22 22:00:00.000000	2148-01-22 23:10:55.000000	2148-01-26 18:48:01.000000	7.6680555555555556	3.82	2148-08-07	0	198	0	1	150	47	0	46	2	2	7	0		9.8	238	0.6	24			134	10.6	9.8	238	0.6	24			134	10.6	0	0	0	0	1483.1111432388425
19940978	22847440	31488667	M	39.38409275372371073304	SINGLE	BLACK/AFRICAN AMERICAN	Private	English	2180-06-16 18:40:00.000000	2180-05-20 06:53:00.000000	2180-05-20 08:03:44.000000	2180-06-02 17:59:46.000000	27.4909722222222222	13.41		0		0	0	193	117.9	1	51	11	2	1	3	2180-05-21 13:26:00.000000	8.5	223	1.2	14			134	13.9	8.5	223	1.2	14			134	13.9	1	1	0	0
14283005	27641024	31489080	M	91.01623543051212924886	MARRIED	WHITE	Medicare	English	2176-02-15 11:51:00.000000	2176-01-06 22:19:00.000000	2176-01-06 22:21:05.000000	2176-01-17 16:44:12.000000	39.5638888888888889	10.77	2176-03-30	0	84	0	1	168	71.2	1	53	8	2	8	3	2176-01-08 00:00:00.000000	5.6	141	1.1	26			141	13.4	4.8	148	0.9666666666666667	18.666666666666668			144.33333333333334	11.7	1	0	1	1	1784.9999605715275
15690068	20908820	31504326	F	79.3257592074417631	MARRIED	WHITE - RUSSIAN	Medicare	Russian	2127-05-27 18:50:00.000000	2127-04-29 16:58:00.000000	2127-04-29 17:50:00.000000	2127-05-23 13:51:51.000000	28.0777777777777778	23.83	2130-06-14	0	1142	0	0	157	69	1	51	16	3	5	3	2127-05-06 17:00:00.000000	4.7	146	1.1	21	0.02		144	9.1	5.65	168	1.1	20	0.02		145	9.149999999999999	1	1	1	1	1043.333676993847
19891424	27545155	31505304	M	47.2432006267990355253	MARRIED	WHITE	Private	English	2129-04-29 13:00:00.000000	2129-03-30 19:51:00.000000	2129-03-30 19:51:44.000000	2129-04-12 13:31:29.000000	29.7145833333333333	12.74		0		0	0	178	83.2	1	46	11	4	1	2	2129-04-04 04:59:00.000000	13.4	111	1.6	32	0.04		136	17	14.9	150	1.1	22.4	0.035		136.85714285714286	12.76	1	0	1	1	1955.8499948028475
13840732	26949782	31510447	M	61.0069761966038955	DIVORCED	HISPANIC/LATINO - DOMINICAN	Medicare	Spanish	2147-02-03 13:59:00.000000	2147-01-04 00:00:00.000000	2147-01-04 13:35:39.000000	2147-01-27 17:38:00.000000	30.5826388888888889	23.17		0		0	0	175	86.2	1	33	12	4	3	1	2147-01-06 00:00:00.000000	6.5	36	1.1	15			139	13.5	13.375	88.75	1.2000000000000002	14.5			142.8	9.858333333333334	1	0	1	1	9586.127808447927
19960105	27292691	31512322	F	66.5955289004732935	MARRIED	WHITE	Private	English	2147-08-23 14:16:00.000000	2147-08-06 18:06:00.000000	2147-08-06 18:07:20.000000	2147-08-23 14:16:50.000000	16.8402777777777778	16.84	2147-12-29	0	145	0	1	163	56.8	1	62	8	4	4	2	2147-08-08 18:00:00.000000	18.6	469	0.6	19			121	10.3	18.6	469	0.55	17			121	10.3	1	0	1	1	3252.3333378732204
17875153	28432434	31515138	M	67.70590944573126249932	MARRIED	UNKNOWN	Medicare	English	2173-09-24 16:18:00.000000	2173-09-15 19:52:00.000000	2173-09-15 19:53:21.000000	2173-09-23 02:30:32.000000	8.8513888888888889	7.28		0		0	0		130	1	89	7	3	3	2	2173-09-17 11:00:00.000000	9.7	288	0.8	18			146	9.5	9.75	294	0.8000000000000002	17			144	9.65	1	0	0	0	1904.980352640152
14115302	22172706	31522732	M	83.93988103169344647597	WIDOWED	UNKNOWN	Medicare	English	2128-12-16 16:00:00.000000	2128-12-09 06:49:00.000000	2128-12-09 08:24:00.000000	2128-12-13 04:33:40.000000	7.3826388888888889	3.84		0		0	0	178	82.8	1	63	8	3	6	2	2128-12-10 22:00:00.000000	0.8	9	0.8	31	0.86		143	7.1	0.8000000000000002	10.8	0.7666666666666666	29.666666666666668	0.7466666666666666		143	7.333333333333333	0	0	0	0	2157.300014734268
10790860	26611769	31538605	M	88.516041190954673	MARRIED	WHITE	Medicare	English	2201-07-28 13:45:00.000000	2201-07-09 10:45:00.000000	2201-07-09 13:26:00.000000	2201-07-20 17:52:54.000000	19.125	11.19	2201-11-10	0	124	0	1	170	73.9	1	41	7	3	8	2	2201-07-12 01:00:00.000000	17.2	379	1.3	62			138	7.9	16.05	369	1.35	58.5			138	7.7	1	0	1	1	3974.193776641041
11247296	22500896	31568022	F	71.3491274278423621	MARRIED	WHITE	Medicare	English	2132-06-19 10:55:00.000000	2132-05-08 00:00:00.000000	2132-05-14 12:15:49.000000	2132-05-30 18:33:03.000000	42.4548611111111111	16.26		0		0	0		88	1	54	9	1	5	2	2132-05-15 13:00:00.000000	8.5	277	0.8	16		3709	145	8.7	8.5	277	0.8	16		3709	145	8.7	0	0	0	0	1073.2742174714804
14062965	29168762	31573231	F	85.63645587491763451812	WIDOWED	SOUTH AMERICAN	Medicare	English	2156-08-24 15:11:00.000000	2156-08-20 11:03:00.000000	2156-08-20 11:35:00.000000	2156-08-23 21:20:07.000000	4.1722222222222222	3.41	2156-08-24	0	4	1	1	127	25.8	0	45	3	3	6	0		31.3	306	1.2	46	0.17		136	8.6	31.3	306	1.15	47	0.22666666666666668		137.5	8.6	0	0	0	0	320
15593351	28649799	31583513	F	71.09792213868552296225	MARRIED	WHITE	Medicare	English	2181-03-17 18:02:00.000000	2181-02-05 18:22:00.000000	2181-02-05 18:24:12.000000	2181-02-11 07:17:21.000000	39.9861111111111111	5.54		0		0	0	142	86.4	1	56	8	3	6	2	2181-02-07 12:00:00.000000	12.1	174	1.4	25			135	9.2	7.539999999999999	136.11111111111111	0.9750000000000001	24.625			137.3	8.735714285714286	1	0	1	1	4871.722337335348
16218892	23641399	31598816	M	47.42070470476499903565	SINGLE	HISPANIC/LATINO - GUATEMALAN	Other	Spanish	2159-06-17 17:26:00.000000	2159-06-03 15:49:00.000000	2159-06-03 17:17:43.000000	2159-06-08 18:53:14.000000	14.0673611111111111	5.07		0		0	0	168	67	1	51	6	2	1	2	2159-06-06 22:00:00.000000	9.7	123	1.6	37	0.57		136	10.7	9.916666666666666	107.83333333333333	1.7249999999999999	37.5	0.6		139.5	9.799999999999999	0	0	1	1	7393.848339941353
10415643	26487500	31625955	F	79.19235534248525635058	MARRIED	WHITE	Medicare	English	2169-03-28 15:15:00.000000	2169-03-12 06:09:00.000000	2169-03-21 09:01:44.000000	2169-03-24 21:33:37.000000	16.3791666666666667	3.52	2169-10-23	0	225	0	1		72.2	1	43	1	3	5	1	2169-03-22 22:43:00.000000	29.4	148	1.4	21	0.08		144	11.1	18.833333333333332	291.6666666666667	0.8800000000000001	20.6	0.08		142	10.466666666666667	0	0	0	0	539.9999976158142
13844924	24586640	31633942	M	94.0161718501401506	WIDOWED	WHITE	Medicare	English	2141-01-13 16:00:00.000000	2141-01-06 15:11:00.000000	2141-01-06 16:39:00.000000	2141-01-13 17:07:12.000000	7.0340277777777778	7.02		0		0	0	191	66.7	1	27	4	2	8	3	2141-01-07 21:00:00.000000	9.5	233	0.8	19	0.02		138	12.2	9.5	233	0.8	19	0.02		138	12.2	0	0	0	0
18788795	22798677	31638293	M	63.58019941420878333939	SINGLE	WHITE	Medicaid	English	2151-08-17 13:35:00.000000	2151-07-31 21:55:00.000000	2151-08-03 08:26:30.000000	2151-08-06 12:45:57.000000	16.6527777777777778	3.18		0		0	0	185	86	1	27	9	3	4	2	2151-08-04 09:00:00.000000	12.5	222	1.3	24	0.02	5790	137	13.6	15.86	157	1.1600000000000001	19.6	0.02	5790	134.85714285714286	10.399999999999999	1	0	1	1	8411.910619329661
14288515	29349656	31642921	M	60.57128409231261586686		WHITE	Medicaid	English	2163-08-03 02:13:00.000000	2163-07-28 15:46:00.000000	2163-07-28 17:52:00.000000	2163-08-03 04:40:58.000000	5.4354166666666667	5.45	2163-08-03	1	6	1	1	188	75	1	48	15	3	7	3	2163-07-30 03:00:00.000000	12.1	109	2	43	0.39		135	16.1	12.1	109	2.1333333333333333	41.666666666666664	0.45		134	16.1	1	0	1	1	2046.6399471284822
17161867	24551755	31649366	F	50.32497669733735136947	SINGLE	WHITE	Medicare	English	2151-05-23 16:45:00.000000	2151-04-29 16:41:00.000000	2151-04-29 16:41:35.000000	2151-05-14 18:01:40.000000	24.0027777777777778	15.06	2152-02-07	0	284	0	1	163	96	1	44	6	3	7	3	2151-05-01 06:00:00.000000	11.2	193	1	20			139	12.1	12.3	203.5	1	20			140	12.35	1	0	0	0
18147510	21282264	31652566	F	86.13613120433393019788	MARRIED	WHITE	Medicare	English	2168-02-29 15:30:00.000000	2168-02-19 17:18:00.000000	2168-02-19 17:19:14.000000	2168-02-27 18:33:02.000000	9.925	8.05		0		0	0	152	49.7	1	73	9	3	6	2	2168-02-20 22:51:00.000000	13.7	334	0.9	20	0.2		141	10	13.85	331	1	21.5	0.2		140	9.45	1	0	1	1	1974.1912214392796
16162295	24209104	31669342	F	75.60398121123954954675	SINGLE	UNABLE TO OBTAIN	Medicare	English	2154-08-26 14:04:00.000000	2154-08-09 14:23:00.000000	2154-08-09 14:23:46.000000	2154-08-26 16:07:07.000000	16.9868055555555556	17.07		0		0	0		56.6	1	65	10	4	4	2	2154-08-10 15:30:00.000000	20	916	0.6	10	0.02		135	12.4	16.35	795.5	0.36	8.6	0.015		136.2	10.25	1	0	1	1	7058.548494018614
19960105	20796727	31681448	F	65.62925745122411989859	MARRIED	WHITE	Private	English	2146-08-29 17:19:00.000000	2146-08-18 19:57:00.000000	2146-08-18 22:00:24.000000	2146-08-24 23:11:45.000000	10.8902777777777778	6.05	2147-12-29	0	498	0	0	163	61.2	1	60	6	4	5	2	2146-08-20 21:00:00.000000	20	457	1	16	0.33	2904	138	8.8	20	457	1	16	0.5133333333333333	2904	138	8.8	1	0	1	1	4090.1206359378994
13333927	26254763	31699045	F	96.9461717619185818	WIDOWED	BLACK/AFRICAN	Medicare	English	2139-03-05 16:34:00.000000	2138-12-12 19:00:00.000000	2138-12-12 19:01:28.000000	2138-12-26 20:57:24.000000	82.8986111111111111	14.08	2139-03-06	0	84	0	1	163	81	1	31	6	2	5	2	2138-12-14 03:00:00.000000	9.1	134	1.4	31	0.06		138	9.8	8.025	219	1.2600000000000002	50.2	0.06333333333333334		140.4	9.325	1	0	0	0	855.224
15403293	26027504	31710974	M	68.97645495619647004208	MARRIED	WHITE	Medicare	English	2158-12-29 15:37:00.000000	2158-12-23 15:25:00.000000	2158-12-23 16:59:00.000000	2158-12-26 17:24:33.000000	6.0083333333333333	3.02	2159-02-06	0	45	0	1	165	94	1	35	4	3	5	2	2158-12-25 06:00:00.000000	4.3	251	1.2	35			139	16	4.3	251	1.2000000000000002	33.666666666666664			139.66666666666666	16	0	0	0	0	3479.999952316284
18343852	25297121	31712494	M	67.2949824286971986	MARRIED	WHITE	Medicare	English	2186-05-07 17:30:00.000000	2186-04-18 11:11:00.000000	2186-04-19 12:18:38.000000	2186-04-29 16:46:45.000000	19.2631944444444444	10.19		0		0	0	173	80.1	1	56	10	4	5	1	2186-04-21 06:00:00.000000	12	90	1.2	37			137	14.5	12.1	86.66666666666667	1.2	36			138.66666666666666	14.1	1	0	1	1	1971.2837584726512
15389294	29354781	31728221	F	40.55343063259732207991	MARRIED	WHITE - BRAZILIAN	Other	Portuguese	2126-08-10 07:18:00.000000	2126-07-22 03:16:00.000000	2126-07-22 03:18:51.000000	2126-07-26 13:52:33.000000	19.1680555555555556	4.44	2126-08-10	1	19	1	1	160	46	1	51	2	3	8	1	2126-07-25 05:00:00.000000	24.6	483	0.4	10	0.55	5975	130	9.2	17.875	265.875	0.38	9.4	0.39666666666666667	5776.5	128.16666666666666	7.837499999999999	0	0	0	0
17688794	27109110	31729378	F	72.41008769528148460473	MARRIED	WHITE	Medicare	English	2188-06-02 16:12:00.000000	2188-05-29 18:45:00.000000	2188-05-29 20:42:00.000000	2188-06-02 16:17:46.000000	3.89375	3.82		0		0	0		54.2	1	30	2	3	4	1	2188-05-31 14:00:00.000000	13.9	469	0.5	15			137	11.7	12.45	411.5	0.525	16.25			138	10.8	0	0	0	0	2371.5000027269125
18615927	24910682	31746261	F	87.3553315336133303	WIDOWED	WHITE	Medicare	English	2156-05-30 19:41:00.000000	2156-05-09 18:00:00.000000	2156-05-14 19:50:31.000000	2156-05-17 22:19:44.000000	21.0701388888888889	3.1		0		0	0		55.8	0	37	3	2	6	0		4.7	157	0.5	9			137	10.3	8.16	177.4	0.43999999999999995	12.2			144	8.620000000000001	0	0	0	0	5634.166964232922
19122448	24507586	31761871	M	57.94477884982194453723	SINGLE	WHITE	Medicare	English	2113-01-17 15:00:00.000000	2112-12-11 01:45:00.000000	2112-12-27 19:53:00.000000	2113-01-17 15:04:53.000000	37.5520833333333333	20.8	2113-04-16	0	126	0	1	168	77	1	82	9	4	3	1	2112-12-31 03:52:00.000000	19.7	157	1.7	33	1.09	30626	119	8.5	22.63	199.6	2.0900000000000003	38.8	1.3375	30626	129.47058823529412	8.255555555555555	1	0	1	1	3966.4535852223635
12876250	23046580	31766406	F	76.0387975643545923	MARRIED	WHITE	Medicare	English	2131-01-28 13:39:00.000000	2131-01-15 09:54:00.000000	2131-01-15 13:15:00.000000	2131-01-25 04:32:34.000000	13.1562	9.64		0		0	0	155	55.2	1	39	7	3	6	2	2131-01-20 07:12:00.000000	14.6	156	0.6	8	0.37		141	9.9	14.6	156	0.6	8	0.345		141	9.9	0	0	1	1	6407.838993683457
16605320	23103059	31814470	M	65.97121489922358935233	SINGLE	WHITE	Private	English	2167-01-22 18:30:00.000000	2166-12-21 17:29:00.000000	2166-12-21 17:30:55.000000	2167-01-16 17:22:42.000000	32.0423611111111111	25.99		0		0	0	188	86	1	25	8	0	4	2	2166-12-23 12:33:00.000000	7.9	135	1.1	17	0.1		141	12.7	7.85	132.5	1	16.75	0.09000000000000001		145.75	12.7	1	0	1	1	3388.974013775587
13402290	23123365	31817350	M	79.61281667740536107263	MARRIED	ASIAN	Medicaid	Chinese	2116-09-22 13:00:00.000000	2116-08-11 19:50:00.000000	2116-08-11 19:51:20.000000	2116-08-16 20:59:47.000000	41.7152777777777778	5.05		0		0	0	157	52.5	1	30	6	4	6	3	2116-08-13 01:00:00.000000	13.5	218	1.3	46	0.94		138	11.6	15.683333333333335	212.33333333333334	1.04	28.8	0.7999999999999999		139.83333333333334	11.054545454545455	0	0	0	0	478.3
14001336	22216032	31856313	M	81.89767347554650219733	MARRIED	WHITE	Medicare	English	2130-12-12 10:15:00.000000	2130-11-24 20:50:00.000000	2130-11-24 20:51:30.000000	2130-12-03 21:53:00.000000	17.5590277777777778	9.04	2130-12-30	0	36	0	1	168	69.5	1	72	7	3	6	2	2130-11-26 03:00:00.000000	13.5	213	0.5	19			139	10.3	11.9	211	0.8	14.5			139	9.9	0	0	1	1	6073.992422819138
19103929	22425022	31859355	F	77.71418592178458239864	WIDOWED	BLACK/AFRICAN AMERICAN	Medicare	English	2141-10-08 16:18:00.000000	2141-09-18 20:25:00.000000	2141-09-18 21:20:00.000000	2141-10-01 17:28:07.000000	19.8284722222222222	12.84	2142-07-09	0	294	0	1	152	48	1	46	7	4	5	1	2141-09-28 08:00:00.000000	8.5	85	0.5	19			147	8.9	7.425	129	0.4666666666666666	15.333333333333334			145	8.9	1	0	1	1	7228.970058942214
12376118	23882377	31871361	F	77.6058464129414348721	SINGLE	WHITE	Medicare	English	2133-08-21 15:30:00.000000	2133-08-10 06:44:00.000000	2133-08-10 08:01:00.000000	2133-08-15 21:59:28.000000	11.3652777777777778	5.58	2135-12-03	0	845	0	0	152	124.1	1	39	5	2	6	2	2133-08-11 11:00:00.000000	7.8	182	1.5	23			141	11.3	6.949999999999999	206.5	1.3333333333333333	25			140	10.850000000000001	1	0	1	1	655.4249855168164
12013634	29813863	31889518	M	75.6788366039198364	MARRIED	WHITE	Medicare	English	2139-09-14 16:44:00.000000	2139-09-05 21:47:00.000000	2139-09-05 23:50:00.000000	2139-09-11 23:59:00.000000	8.7895833333333333	6.01	2139-11-03	0	59	0	1	178	63	1	32	7	2	6	2	2139-09-07 05:00:00.000000	8.4	146	1.1	26	0.04		138	13.4	8.4	146	1.1	25.333333333333332	0.4366666666666667		138.33333333333334	13.4	1	0	1	1	3041.2382008563727
12641004	25231715	31918972	M	31.2095415125070805	SINGLE	BLACK/AFRICAN AMERICAN	Medicaid	English	2176-03-25 20:45:00.000000	2176-03-18 00:25:00.000000	2176-03-18 01:09:00.000000	2176-03-22 11:51:38.000000	7.8472222222222222	4.45		0		0	0	178	66.3	1	56	4	2	7	1	2176-03-20 04:27:00.000000	5.2	205	1.3	29		11943	133	12.5	5.550000000000001	203.5	1.15	24.25		11943	135.5	11.7	0	0	1	1	3443.577782580629
10805500	27160459	31924563	F	83.32774312799611094988	MARRIED	WHITE	Medicare	English	2134-05-08 19:00:00.000000	2134-04-30 16:56:00.000000	2134-05-01 18:04:17.000000	2134-05-04 18:17:46.000000	8.0861111111111111	3.01		0		0	0	150	78	1	25	4	1	7	2	2134-05-03 22:00:00.000000	4.4	90	0.5	17			137	8.7	4.8	91.75	0.5333333333333333	15			136	7.74	0	0	0	0	3709.1864680573344
15821871	26233817	31936643	F	59.88902814207201435395	SINGLE	BLACK/AFRICAN AMERICAN	Medicaid	English	2176-12-03 19:50:00.000000	2176-11-20 17:03:00.000000	2176-11-20 17:30:24.000000	2176-12-03 19:56:40.000000	13.1159722222222222	13.1		0		0	0	170	61	1	97	7	3	3	3	2176-11-24 18:00:00.000000	10.5	213	0.6	21			138	7.6	10.533333333333333	195.83333333333334	0.7000000000000001	22			138.5	7.4624999999999995	1	0	0	0	5807.874537030235
19504755	26486254	31937469	F	72.95177002888191634283	DIVORCED	WHITE	Medicare	English	2142-01-05 19:03:00.000000	2141-12-14 15:02:00.000000	2141-12-24 20:28:42.000000	2142-01-05 19:03:38.000000	22.1673611111111111	11.94		0		0	0	150	58.5	1	52	7	3	8	3	2141-12-28 23:00:00.000000	10.7	258	0.4	12	0.07		145	9.5	16.9	322.5	0.35	11	0.07		138.75	8.85	1	0	1	1	1905.62
15189222	23927207	31939431	M	77.64856922868186633033	MARRIED	WHITE	Medicare	English	2174-08-29 16:10:00.000000	2174-08-25 21:14:00.000000	2174-08-25 23:47:58.000000	2174-08-29 16:48:33.000000	3.7888888888888889	3.71	2175-03-22	0	209	0	1		93.5	1	37	3	3	8	1	2174-08-27 16:19:00.000000	2.2	79	0.6	23	0.54		132	9.6	2.05	72.5	0.6499999999999999	25.5	0.6466666666666666		133	9.75	0	0	0	0	2155.6103581637144
19729398	25921046	31950020	F	71.0366880801708943	WIDOWED	WHITE	Medicare	English	2143-01-26 13:36:00.000000	2143-01-14 21:13:00.000000	2143-01-18 16:44:00.000000	2143-01-22 19:46:07.000000	11.6826388888888889	4.13	2144-08-29	0	593	0	0	160	54.1	1	33	1	2	11	1	2143-01-20 15:40:00.000000	8.6	319	0.9	21			125	8.1	10.85	316	0.8500000000000001	20			124.5	9	0	0	0	0	1689.9999976158142
14260018	27618409	31978081	M	61.3414784657234868	SINGLE	WHITE	Medicaid	English	2173-05-16 13:30:00.000000	2173-05-05 16:34:00.000000	2173-05-05 16:35:46.000000	2173-05-13 21:50:02.000000	10.8722222222222222	8.22	2175-05-05	0	730	0	0	173	80	1	46	10	2	7	1	2173-05-08 00:00:00.000000	22.2	163	2.1	34			136	12.3	24.549999999999997	158	1.85	34			134.66666666666666	12.133333333333335	1	0	1	1	3852.245655771345
14046634	25192605	31983533	M	91.3961262517575865986	MARRIED	WHITE	Medicare		2126-05-30 13:15:00.000000	2126-05-25 16:22:00.000000	2126-05-25 16:22:36.000000	2126-05-28 20:27:55.000000	4.8701388888888889	3.17	2126-07-26	0	62	0	1		76.3	1	40	2	2	8	2	2126-05-26 18:00:00.000000	9.1	190	1.2	22			141	11.5	9.6	208	1.15	21.5			141	12	0	0	0	0	720
10763460	21967181	32008270	F	79.7023400466905047	MARRIED	WHITE	Medicare	English	2147-09-20 06:40:00.000000	2147-09-14 16:51:00.000000	2147-09-16 10:08:54.000000	2147-09-20 13:09:20.000000	5.5756944444444444	4.13	2147-09-20	1	6	1	1		110	1	57	6	3	6	2	2147-09-17 17:00:00.000000	15.2	192	1.4	45	0.08		143	9.4	16.45	193.75	1.4	47	0.0675		147.2	9.825	0	0	0	0	91.47448159754276
15878234	24132376	32017390	F	75.06595322796635898634	DIVORCED	WHITE - RUSSIAN	Medicaid	Russian	2144-02-06 15:30:00.000000	2144-01-25 02:08:00.000000	2144-01-26 17:29:58.000000	2144-01-30 01:22:37.000000	12.5569444444444444	3.33		0		0	0		92.5	1	50	4	3	5	2	2144-01-27 18:00:00.000000	12.1	404	0.8	27			139	10.5	12.1	404	0.8	27			139	10.5	0	0	0	0	235.00000163912773
16537903	20863515	32027656	F	76.72256506949121708651		UNABLE TO OBTAIN	Medicare	English	2138-12-02 13:45:00.000000	2138-09-21 21:52:00.000000	2138-09-21 21:53:35.000000	2138-09-30 00:27:25.000000	71.6618055555555556	8.11		0		0	0	157	54	0	74	7	3	7	0		11.3	139	3.2	123	0.05		150	11.4	9.266666666666667	238.33333333333334	1.5599999999999998	64.2	0.045		139.4	8.322222222222223	1	0	0	0
11687174	26769319	32027724	M	66.44268594520892996972	MARRIED	WHITE	Other	English	2157-06-24 17:40:00.000000	2157-06-11 16:30:00.000000	2157-06-17 19:12:34.000000	2157-06-21 16:17:50.000000	13.0486111111111111	3.88	2157-08-11	0	61	0	1		135.2	1	20	3	2	11	1	2157-06-20 20:00:00.000000	4.7	117	1	14	0.12		138	12.4	4.500000000000001	107.66666666666667	0.9	13	0.11499999999999999		138.66666666666666	11.4	0	0	0	0	2164.8930424004793
11181695	29624209	32029248	M	82.2650261105422341	DIVORCED	UNABLE TO OBTAIN	Medicare	English	2117-04-11 19:11:00.000000	2117-04-07 18:24:00.000000	2117-04-07 20:27:00.000000	2117-04-11 22:35:43.000000	4.0326388888888889	4.09	2117-04-11	1	4	1	1	173	66.3	1	84	14	4	5	3	2117-04-09 01:14:00.000000	18.2	131	1.6	49	0.04		140	13.4	18.2	109.66666666666667	1.5750000000000002	50.25	0.04		142.75	13.533333333333333	1	1	0	0
12612603	21332395	32030316	M	55.5091908621924338	MARRIED	WHITE	Private	English	2163-08-27 18:08:00.000000	2163-07-05 21:56:00.000000	2163-07-13 12:20:00.000000	2163-08-08 19:17:18.000000	52.8416666666666667	26.29	2165-09-16	0	804	0	0	178	105	1	43	12	3	4	3	2163-07-19 13:56:00.000000	10.6	262	0.7	9			134	10.5	9.55	264.5	0.7	11			132.5	10.6	1	0	1	1	3317.6371826268733
19418764	22832375	32030432	M	59.1638641107965556	SINGLE	WHITE	Medicare	English	2123-03-12 14:12:00.000000	2123-03-01 19:38:00.000000	2123-03-01 23:09:00.000000	2123-03-05 07:02:03.000000	10.7736111111111111	3.33		0		0	0		110	0	34	5	4	3	0		20.4	299	1	31			139	12.2	21.9	294	0.95	28.5			139	12.25	0	0	1	1	14738.065152138472
12116333	28334323	32056364	M	64.54910321254279506616		UNKNOWN	Medicaid	Spanish	2138-08-31 14:22:00.000000	2138-07-20 13:20:00.000000	2138-08-08 12:15:46.000000	2138-08-14 18:33:45.000000	42.0430555555555556	6.26		0		0	0		58.8	1	27	1	2	7	2	2138-08-10 06:31:00.000000	9.2	300	0.8	10			139	13.5	9.033333333333333	421	0.7000000000000001	14.333333333333334			140.33333333333334	13.266666666666666	0	0	0	0	2742.499985218048
11375051	27851599	32065781	M	88.9161477565255061	MARRIED	WHITE	Medicare	Italian	2144-12-13 14:00:00.000000	2144-11-30 20:35:00.000000	2144-12-07 13:08:14.000000	2144-12-11 10:17:30.000000	12.7256944444444444	3.88	2154-07-25	0	3524	0	0	170	76	1	84	11	3	6	2	2144-12-09 16:00:00.000000	14	120	0.9	20			138	12.3	11.733333333333334	128	0.9	18.5			137	9.714285714285714	1	0	1	1	4709.2039545327425
15985181	20334412	32077332	M	89.7366673633128477	MARRIED	ASIAN	Medicare	Chinese	2175-10-21 19:25:00.000000	2175-09-27 00:43:00.000000	2175-10-03 07:01:09.000000	2175-10-07 04:11:29.000000	24.7791666666666667	3.88	2176-02-26	0	152	0	1		67.6	1	38	5	3	8	1	2175-10-04 09:00:00.000000	12.9	215	0.7	25		2656	142	14.9	10.8	261.8	0.7166666666666667	23.833333333333332		2656	143.16666666666666	11.919999999999998	0	0	0	0	1276.901606068015
13021449	24347414	32096776	M	61.88773904242483978659	SINGLE	WHITE	Medicare		2186-12-07 16:26:00.000000	2186-11-21 05:45:00.000000	2186-11-21 05:46:03.000000	2186-11-28 09:00:43.000000	16.4451388888888889	7.14		0		0	0		127	1	44	5	1	3	2	2186-11-24 02:00:00.000000	10.1	164	0.5	7	1.36		136	14.6	9.6	137.5	0.45	7	1.2850000000000001		140.5	14.1	1	0	1	1	5923.844619169831
14208778	23267383	32114786	F	68.2688280038379425	MARRIED	BLACK/AFRICAN AMERICAN	Medicare	English	2162-04-25 16:00:00.000000	2162-04-09 08:46:00.000000	2162-04-09 10:40:00.000000	2162-04-15 22:57:10.000000	16.3013888888888889	6.51		0		0	0		162.2	1	17	4	1	5	1	2162-04-11 00:00:00.000000			0.9	17			142				0.975	17.5			141.6		0	0	0	0	331.6972488760948
17697755	29406150	32116592	M	78.29796074322716932274	MARRIED	WHITE	Medicare	English	2157-04-30 11:58:00.000000	2157-04-19 19:52:00.000000	2157-04-22 21:49:11.000000	2157-04-27 17:43:20.000000	10.6708333333333333	4.83	2157-04-30	1	11	1	1		90.6	1	32	8	2	6	3	2157-04-24 05:00:00.000000	11.4	137	1.2	22	0.02		134	8.7	9.100000000000001	132.8	1.0833333333333333	22	0.05000000000000001		138.14285714285714	8.966666666666667	1	0	1	1	2523.83
19780933	26808792	32120928	M	62.9752868569940539	MARRIED	WHITE	Private	English	2189-12-31 17:04:00.000000	2189-12-22 21:50:00.000000	2189-12-25 18:05:07.000000	2189-12-29 16:28:41.000000	8.8013888888888889	3.93	2191-08-09	0	595	0	0	178	104.5	1	35	8	3	6	3	2189-12-26 21:15:00.000000	5.9	159	1	29			133	8.4	8.46	156.4	0.9249999999999999	25.75			135.42857142857142	8.18	1	0	1	1	6319.289302311838
16965015	28130748	32122320	M	61.80213179815635174	SINGLE	UNKNOWN	Medicaid	English	2187-01-03 14:48:00.000000	2186-10-20 23:20:00.000000	2186-10-21 16:23:36.000000	2186-10-25 15:45:44.000000	74.6444444444444444	3.97		0		0	0	180	88.6	1	48	3	3	4	2	2186-10-24 19:00:00.000000	9.3	224	1.1	43			131	15.1	17.784615384615385	176.07692307692307	1.0083333333333333	22.416666666666668			131.26666666666668	11.747368421052634	0	0	1	1	1431.9444657117128
15853548	20522064	32138106	M	64.2150724724976865	MARRIED	WHITE	Private	English	2145-04-12 13:52:00.000000	2145-03-20 00:54:00.000000	2145-04-02 13:41:29.000000	2145-04-07 00:12:07.000000	23.5402777777777778	4.44	2145-04-13	0	24	1	1	178	70	1	48	5	3	9	2	2145-04-03 23:00:00.000000	10.2	132	0.3	16			131	7.3	12.725	148.75	0.3666666666666667	19			133.5	7.58	1	0	0	0
11131318	22805099	32152372	F	91.3247580447423291346	MARRIED	WHITE	Medicare	English	2186-05-03 17:00:00.000000	2186-04-29 14:46:00.000000	2186-04-29 14:47:50.000000	2186-05-03 17:20:31.000000	4.0930555555555556	4.11	2189-08-24	0	1213	0	0	165	72.9	0	54	5	1	6	0		9.4	237	1.5	38		24417	130	8.2	9.3	224	1.55	38		24417	129.5	8.149999999999999	1	0	0	0	1109.999998807907
19484871	28653781	32157105	F	52.28963863532793173963	MARRIED	WHITE	Medicare	English	2172-04-20 19:01:00.000000	2172-04-15 18:55:00.000000	2172-04-15 18:55:47.000000	2172-04-18 21:05:13.000000	5.0041666666666667	3.09		0		0	0	168	76.5	1	38	6	2	3	2	2172-04-16 22:00:00.000000	12	185	1.2	21			139	9.2	11.75	203.5	1.15	20.25			139.25	9	1	0	1	1	2617.030434820801
13935446	25854491	32179717	F	83.25394122253191034985	MARRIED	WHITE	Medicare	Kabuverdianu	2182-04-10 19:00:00.000000	2182-04-03 18:00:00.000000	2182-04-03 18:00:36.000000	2182-04-08 11:51:10.000000	7.0416666666666667	4.74	2182-12-29	0	270	0	1	168	46.3	1	38	2	2	6	1	2182-04-05 03:00:00.000000	5.3	186	1.2	24			134	12.3	5.449999999999999	174	1.1	23.25			135.25	12.333333333333334	0	0	0	0	1438.2295425906777
10409536	26941330	32189552	M	66.3991194726905571	DIVORCED	OTHER	Medicare	English	2154-06-02 18:40:00.000000	2154-05-26 03:55:00.000000	2154-05-26 03:56:00.000000	2154-05-30 18:22:43.000000	7.6145833333333333	4.6		0		0	0	178	81	1	21	3	3	4	2	2154-05-27 08:00:00.000000	17.7	192	0.6	11	1.25		141	14.5	14.966666666666667	170.33333333333334	0.625	10.75	3.7675		139	13.233333333333334	0	0	0	0
15771672	25737679	32205978	F	91.1664451240547363	SINGLE	WHITE	Medicare	English	2127-03-07 19:00:00.000000	2127-03-02 12:27:00.000000	2127-03-03 17:56:39.000000	2127-03-07 19:51:12.000000	5.2729166666666667	4.08	2127-03-07	1	5	1	1		44	1	52	5	3	15	1	2127-03-06 23:00:00.000000	15.4	113	1.1	44			134	7.9	15.166666666666666	107	1	42.333333333333336			137.66666666666666	7.3999999999999995	0	0	0	0	3680.833336636424
17595401	25539893	32213722	F	75.33546251526385245947	MARRIED	WHITE	Medicare	English	2196-05-23 14:09:00.000000	2196-05-02 12:36:00.000000	2196-05-09 10:28:23.000000	2196-05-22 10:43:26.000000	21.0645833333333333	13.01	2202-08-19	0	2299	0	0	163	97.9	1	55	15	4	7	2	2196-05-10 13:00:00.000000	5	135	1.3	31			139	10.7	11.483333333333334	118.16666666666667	1.0666666666666667	23			135.8	9.470000000000002	1	0	1	1	21924.092934604734
15134614	21122236	32234453	F	65.78201956206813260493	MARRIED	WHITE	Medicare	English	2116-10-26 12:35:00.000000	2116-10-12 15:02:00.000000	2116-10-12 19:58:51.000000	2116-10-20 16:57:34.000000	13.8979166666666667	7.87		0		0	0	160	42.7	1	47	8	3	6	3	2116-10-14 13:01:00.000000	6.5	239	1	36	0.29		134	8.8	7.716666666666668	114.16666666666667	0.925	26.5	0.2175		136.85714285714286	10.257142857142856	1	0	0	0	18702.611863288097
17426890	29871667	32267939	F	89.8775527215137118	SINGLE	WHITE	Medicare	Russian	2170-11-26 18:30:00.000000	2170-11-17 18:16:00.000000	2170-11-17 19:50:00.000000	2170-11-21 22:00:05.000000	9.0097222222222222	4.09	2171-03-25	0	128	0	1	157	56.5	1	63	6	4	7	2	2170-11-19 08:12:00.000000	16.4	513	0.5	20	0.02	25164	126	8.3	15.75	511.5	0.5	20	0.025	25164	129.66666666666666	8.05	1	0	0	0	1139.5000279992819
19242238	28021626	32298499	F	64.4918305306253571	MARRIED	WHITE	Medicare	English	2184-07-12 18:06:00.000000	2184-06-28 21:06:00.000000	2184-06-30 15:09:36.000000	2184-07-12 18:06:53.000000	13.875	12.12		0		0	0	163	54.8	1	57	8	4	5	2	2184-07-02 16:00:00.000000	14.8	225	0.7	10	0.12		139	14	16.65	222	0.6	10.5	0.105		139.66666666666666	12.966666666666669	1	0	1	1	6035.78
14995394	23744597	32298785	M	97.1548785158576749	SINGLE	WHITE	Medicare	English	2146-03-14 18:29:00.000000	2146-02-26 00:29:00.000000	2146-03-01 08:42:22.000000	2146-03-09 21:36:03.000000	16.75	8.54	2146-06-27	0	121	0	1		72.2	1	45	5	3	6	2	2146-03-02 12:00:00.000000	22.4	61	0.9	24			134	9.4	21.2	52.5	0.8666666666666667	26			132.66666666666666	8.6	0	0	0	0	1299.9999964237213
19058509	24850340	32323140	F	75.49638892387330409245	MARRIED	WHITE	Medicare	English	2133-07-12 17:00:00.000000	2133-07-01 07:15:00.000000	2133-07-01 13:09:07.000000	2133-07-10 00:08:34.000000	11.4062	8.46	2134-02-26	0	240	0	1	160	112.9	1	52	7	4	5	2	2133-07-03 10:00:00.000000	9.4	244	1.3	45	2.74		138	8.9	14.3	245	1.2000000000000002	39.5	2.56		140.33333333333334	9.5	1	0	1	1	3775.32
17882715	21003419	32323726	M	62.92203137463197916267	MARRIED	WHITE	Private	English	2133-12-11 14:48:00.000000	2133-12-03 18:21:00.000000	2133-12-03 18:24:26.000000	2133-12-09 22:04:20.000000	7.8520833333333333	6.15		0		0	0	178	88.2	1	41	4	3	4	2	2133-12-06 01:20:00.000000	11.8	316	1.1	26	0.24		143	15.6	12.55	284	1.0666666666666667	23.666666666666668	0.36666666666666664		142.66666666666666	14.6	0	0	1	1	3410.677395865321
15771722	20082813	32330074	M	86.6273438797655618	WIDOWED	WHITE	Medicare	English	2141-08-30 20:39:00.000000	2141-08-17 20:36:00.000000	2141-08-17 21:43:49.000000	2141-08-23 18:12:18.000000	13.0020833333333333	5.85	2141-09-02	0	16	1	1	178	82.4	1	21	5	1	6	1	2141-08-21 05:59:00.000000	5.3	171	0.9	16			142	12.2	5.3	171	0.9	16			142	12.2	0	0	0	0	1411.25
10344124	24891058	32338783	F	73.51746513270653429781	WIDOWED	HISPANIC/LATINO - DOMINICAN	Medicare	Spanish	2157-07-16 16:50:00.000000	2157-07-09 00:00:00.000000	2157-07-09 11:41:58.000000	2157-07-12 16:17:43.000000	7.7013888888888889	3.19		0		0	0	168	67	1	36	4	4	7	1	2157-07-10 21:00:00.000000	11.3	295	1.6	37			136	10.9	12	294.5	1.8	35.333333333333336			135.66666666666666	11.166666666666666	0	0	1	1	948.7670351266861
16301937	29589528	32340244	M	91.78636219273796551328	WIDOWED	WHITE	Medicare	English	2121-10-30 15:29:00.000000	2121-10-15 05:06:00.000000	2121-10-17 22:45:13.000000	2121-10-21 12:09:38.000000	15.4326388888888889	3.56		0		0	0		73.2	1	51	7	3	5	1	2121-10-21 01:36:00.000000	16	230	1.2	30	0.04		137	12.7	15.55	206.5	1.2333333333333334	31	0.035		139	12.7	0	0	0	0	2222.394156396389
13052791	22185949	32351601	F	67.84997488727412996802	MARRIED	WHITE	Medicare	English	2174-11-16 14:57:00.000000	2174-11-07 10:43:00.000000	2174-11-07 10:43:39.000000	2174-11-14 17:48:21.000000	9.1763888888888889	7.29	2176-02-26	0	476	0	0	163	67.9	1	37	2	4	11	2	2174-11-09 04:00:00.000000	17.4	298	0.5	14	0.92		138	11.2	15.95	287	0.55	15	1.0833333333333333		136.5	10.95	0	0	0	0	2254.0520619750023
11810038	21902679	32353102	M	55.61625427646449325227		UNABLE TO OBTAIN	Other	English	2129-10-08 19:39:00.000000	2129-08-14 01:58:00.000000	2129-08-14 01:59:09.000000	2129-09-16 14:11:33.000000	55.7368055555555556	33.51		0		0	0	178	100	1	45	9	3	4	2	2129-08-15 12:00:00.000000	18.1	170	1.4	18			140	9.9	23.65	203	1.45	16.5			140.5	10.875	1	0	0	0
11153226	28907460	32357329	M	60.6197175814634924	MARRIED	WHITE	Private	English	2144-08-23 10:40:00.000000	2144-08-14 14:08:00.000000	2144-08-14 16:58:00.000000	2144-08-19 20:25:57.000000	8.8555555555555556	5.14	2144-08-23	1	9	1	1	170	63.7	1	53	6	3	4	2	2144-08-16 06:00:00.000000	9	67	1.3	33	0.22		135	9	9	67	1.25	30.5	0.24		135.5	9	0	0	0	0	919.7999658584595
13559838	20727772	32358573	M	63.59887614847750867157	SINGLE	UNKNOWN	Medicare	English	2178-08-18 16:00:00.000000	2178-08-07 17:38:00.000000	2178-08-07 19:01:00.000000	2178-08-17 19:55:38.000000	10.9319444444444444	10.04		0		0	0	188	105.6	1	48	10	3	3	2	2178-08-09 00:00:00.000000	5.2	117	0.8	12			143	11.3	5.933333333333334	114	0.7666666666666666	11			143.33333333333334	11	1	0	1	1	5366.122659754008
17032851	21092023	32359526	M	75.6662346851919793	MARRIED	BLACK/AFRICAN AMERICAN	Medicare	English	2122-09-10 11:30:00.000000	2122-08-31 18:56:00.000000	2122-08-31 18:57:20.000000	2122-09-05 22:47:26.000000	9.6902777777777778	5.16	2126-01-05	0	1223	0	0	191	71.6	1	44	4	3	6	1	2122-09-04 08:04:00.000000	16.6	346	1.1	16	0.02		143	10.9	16.6	346	1.2	19	0.02		142.33333333333334	10.9	0	0	1	1	1587.861542120576
18224196	22410193	32363894	F	79.02979379273042104808	MARRIED	WHITE	Private	English	2154-01-24 14:12:00.000000	2154-01-11 21:10:00.000000	2154-01-11 23:38:00.000000	2154-01-19 17:07:26.000000	12.7097222222222222	7.73		0		0	0	163	55.7	1	54	2	3	5	1	2154-01-17 19:00:00.000000	10.8	472	1.2	43	0.02		133	11.9	10.8	472	1.1	39.5	0.02		134	11.9	0	0	0	0	655.1506000310183
11239107	25883588	32367987	M	71.0421343930873229	SINGLE	WHITE	Medicare	English	2113-02-08 14:50:00.000000	2113-01-15 15:09:00.000000	2113-01-15 16:00:00.000000	2113-02-08 14:53:05.000000	23.9868055555555556	23.95	2113-05-02	0	107	0	1	183	69.4	1	56	10	4	11	2	2113-01-17 12:51:00.000000	9.2	279	0.6	8			127	10.2	9.2	279	0.5	7.666666666666667			127.66666666666667	10.2	1	0	1	1	5057.458436703309
11130590	24143258	32370149	M	87.7968300621384056	SINGLE	ASIAN - CHINESE	Medicare	Chinese	2115-11-02 16:44:00.000000	2115-10-18 18:17:00.000000	2115-10-18 18:18:08.000000	2115-11-02 16:44:23.000000	14.9354166666666667	14.93	2115-11-05	0	18	1	1	160	57.5	1	61	10	3	7	2	2115-10-21 15:00:00.000000	13	175	0.5	24	0.06	9595	120	12.5	13.05	180	0.575	22.5	0.049999999999999996	9595	126	12.65	1	0	1	1	5759.000521587208
13585124	20868564	32384053	M	73.5031304967361062	MARRIED	WHITE	Medicare	English	2158-07-09 14:15:00.000000	2158-07-03 10:14:00.000000	2158-07-03 15:03:48.000000	2158-07-09 15:46:16.000000	6.1673611111111111	6.03	2158-07-25	0	22	1	1		131	0	43	5	2	8	0																		0	0	0	0
10049041	23314477	32397833	M	60.5116502665812439	SINGLE	BLACK/AFRICAN AMERICAN	Medicare	English	2164-08-08 20:00:00.000000	2164-07-06 01:18:00.000000	2164-07-31 09:46:24.000000	2164-08-04 22:53:46.000000	33.7791666666666667	4.55		0		0	0		61.8	1	41	3	3	5	2	2164-08-01 16:00:00.000000	11.8	269	0.7	9		129	139	12	15.833333333333334	229	0.6	12.666666666666666		129	138.33333333333334	11.866666666666667	0	0	0	0	30
16236499	29668761	32422980	F	76.8977829159236281	MARRIED	WHITE	Medicare	English	2164-12-03 11:15:00.000000	2164-11-24 15:13:00.000000	2164-11-24 15:14:31.000000	2164-12-02 00:36:40.000000	8.8347222222222222	7.39	2164-12-03	1	9	1	1	157	60	1	55	9	4	7	2	2164-11-27 14:34:00.000000	18.9	324	1.6	36	3.21		135	9.9	17.6	311.5	1.6	34.5	3.21		137.33333333333334	9.425	1	0	1	1	5248.642584238201
19705919	28024396	32441664	M	77.30822220457790846738	MARRIED	WHITE	Medicare	English	2140-04-26 16:00:00.000000	2140-04-22 13:49:00.000000	2140-04-22 14:00:00.000000	2140-04-25 17:43:00.000000	4.0909722222222222	3.15		0		0	0		95	0	28	3	1	5	0		5.5	150	0.9	16	0.04		137	9.9	6.1	139.25	0.8000000000000002	16.666666666666668	0.39749999999999996		136	9.5	0	0	0	0	2628.0298519805074
15003327	27245455	32446193	M	68.43242828651201729873	SINGLE	WHITE	Private	English	2175-06-28 19:48:00.000000	2175-06-07 22:35:00.000000	2175-06-20 12:29:30.000000	2175-06-27 19:00:38.000000	20.8840277777777778	7.27		0		0	0	163	63	1	51	9	3	6	2	2175-06-22 07:00:00.000000	12.2	307	1	20			137	12.1	35.516666666666666	255.5	0.8666666666666667	18			133.42857142857142	9.299999999999999	1	0	1	1	5331.926388645545
11223798	22778427	32446682	M	61.1279137454679972	MARRIED	BLACK/CARIBBEAN ISLAND	Private	Haitian	2157-08-09 18:49:00.000000	2157-02-16 04:53:00.000000	2157-03-11 07:27:48.000000	2157-04-07 16:31:25.000000	174.5805555555555556	27.38	2157-10-08	0	234	0	1	175	88	1	46	5	1	4	2	2157-03-12 22:00:00.000000																	1	0	0	0	3124.099963724613
16075171	29239803	32447165	M	67.51463405693272466535	MARRIED	WHITE	Medicare	English	2172-07-24 15:40:00.000000	2172-07-06 23:11:00.000000	2172-07-07 00:09:00.000000	2172-07-15 17:40:48.000000	17.6868055555555556	8.73	2176-01-13	0	1286	0	0		72.4	1	32	4	3	6	1	2172-07-10 20:00:00.000000	25.1	147	1.3	19	0.02		138	13.3	35.93333333333333	139.66666666666666	1.2249999999999999	35.75	0.02		134.25	14.366666666666667	0	0	0	0	4910.177063710988
15572326	29812598	32449355	M	75.75443130855706627387	MARRIED	WHITE	Medicare	English	2168-10-07 13:30:00.000000	2168-10-02 13:12:00.000000	2168-10-02 13:13:21.000000	2168-10-05 17:55:04.000000	5.0125	3.2		0		0	0	170	84	1	29	7	2	7	2	2168-10-03 14:15:00.000000	17.2	219	1	21		2598	135	13.1	14.149999999999999	198.5	1.1	20.5		2598	134.66666666666666	13.1	1	0	1	1	4780.91
13723460	21497617	32451880	M	89.7707656841217604	MARRIED	WHITE - RUSSIAN	Medicare	Russian	2162-10-30 14:20:00.000000	2162-10-09 00:00:00.000000	2162-10-22 09:07:20.000000	2162-10-26 22:35:59.000000	21.5972222222222222	4.56	2163-09-04	0	330	0	1	155	60.4	1	40	2	4	10	2	2162-10-25 14:31:00.000000	12.3	323	0.6	9	0.01		134	10	11.475	330.875	0.5909090909090908	8.363636363636363	0.01		138.72727272727272	9.5375	0	0	0	0	50
16987387	26080448	32454627	F	74.59078980511551245476	MARRIED	WHITE	Medicare	English	2128-09-07 12:55:00.000000	2128-08-03 18:45:00.000000	2128-08-03 18:46:50.000000	2128-09-07 13:09:37.000000	34.7569444444444444	34.77		0		0	0	173	79.4	1	18	10	1	6	2	2128-08-05 20:50:00.000000	8.1	133	0.8	19	0.01		148	11.4	7.05	134.5	0.75	18.5	0.01		147.5	11.15	1	0	1	1	2572.9622622318566
10887901	28942534	32464457	M	69.7351480510030183945	MARRIED	BLACK/AFRICAN AMERICAN	Medicare	Spanish	2171-10-29 14:45:00.000000	2171-09-26 12:10:00.000000	2171-09-26 13:42:00.000000	2171-10-06 18:41:30.000000	33.1076388888888889	10.21	2175-07-22	0	1395	0	0	178	58.8	1	45	6	3	4	2	2171-09-28 00:00:00.000000	11.2	229	0.5	19			142	8.3	11.2	287.4	0.58	18			141.8	8.28	1	0	1	1	8382.409082937986
19561143	20935104	32470296	M	79.31731054722318049099		UNKNOWN	Medicare	English	2127-05-05 15:35:00.000000	2127-04-26 21:29:00.000000	2127-05-01 11:47:27.000000	2127-05-04 13:44:26.000000	8.7541666666666667	3.08		0		0	0	178	80	1	32	5	3	5	1	2127-05-03 08:00:00.000000	14.3	271	0.9	11			139	9.4	18.966666666666665	268.6666666666667	0.8500000000000001	10.5			138	8.328571428571427	1	0	1	1	8807.640385583043
13491104	22717697	32473317	M	53.95942286970769456354	MARRIED	WHITE	Medicare	English	2130-12-30 15:10:00.000000	2130-12-17 10:07:00.000000	2130-12-17 10:07:44.000000	2130-12-27 21:34:43.000000	13.2104166666666667	10.48		0		0	0	191	83.3	1	29	4	2	6	2	2130-12-19 12:00:00.000000	7.7	197	1.7	23			140	14.2	7.25	188.5	1.6	22.5			139.5	14.2	0	0	0	0	1628.2500286996365
16688780	23527620	32480573	F	52.59428634530895497597	MARRIED	OTHER	Medicare	English	2153-08-23 14:30:00.000000	2153-08-06 01:24:00.000000	2153-08-14 08:19:39.000000	2153-08-17 19:54:13.000000	17.5458333333333333	3.48		0		0	0	178	88	1	41	6	4	3	2	2153-08-15 22:00:00.000000	22.6	337	0.8	17			132	10.9	22.3	321	0.7	14			134.6	9.86	1	0	1	1	8237.460984710604
18739233	23869589	32485344	F	79.398284257804110395		UNKNOWN	Medicaid	English	2153-06-21 20:45:00.000000	2153-05-26 11:17:00.000000	2153-05-26 11:18:13.000000	2153-06-03 21:28:02.000000	26.3944444444444444	8.42		0		0	0		85	1	30	5	3	7	2	2153-05-27 17:00:00.000000	7.1	126	1.3	18			137	8.6	8.200000000000001	110	1.2000000000000002	19			135.66666666666666	10.25	0	0	0	0
17212891	26935296	32491922	F	78.1922014871114372	WIDOWED	WHITE	Medicare	English	2172-03-20 15:36:00.000000	2172-03-11 04:02:00.000000	2172-03-11 05:15:00.000000	2172-03-20 16:02:03.000000	9.4819444444444444	9.45	2175-07-04	0	1210	0	0	147	50.2	1	25	10	3	6	3	2172-03-12 05:21:00.000000	11.3	420	0.6	18	3.01		134	11.9	11.3	420	0.6499999999999999	18	3.01		132	11.9	1	0	1	1	1670.0663246810436
11564416	22597235	32493415	F	39.53559428482424742439	MARRIED	HISPANIC/LATINO - PUERTO RICAN	Private	English	2154-07-25 15:56:00.000000	2154-07-15 14:55:00.000000	2154-07-15 16:40:00.000000	2154-07-21 16:57:03.000000	10.0423611111111111	6.01		0		0	0		81	1	64	6	4	3	1	2154-07-17 12:00:00.000000	0.1	33	0.5	8			141	3.9	0.10000000000000002	38	0.55	8.5			140	7.033333333333334	0	0	0	0	9847.333360642195
15392906	21466161	32494503	F	72.9366946359460911	WIDOWED	HISPANIC/LATINO - PUERTO RICAN	Medicare	Spanish	2179-12-24 14:55:00.000000	2179-12-09 13:44:00.000000	2179-12-17 10:22:34.000000	2179-12-20 21:35:43.000000	15.0493055555555556	3.47		0		0	0	165	71	1	40	9	3	6	2	2179-12-19 04:00:00.000000	14.2	146	0.8	20			137	11.5	15.433333333333332	150	0.75	19			135.75	8.6125	1	0	1	1	5372.208111423999
19441402	28676335	32510672	M	69.64134418641156639525	MARRIED	WHITE	Medicare	English	2137-08-30 19:36:00.000000	2137-08-23 05:54:00.000000	2137-08-23 05:55:15.000000	2137-08-28 15:19:55.000000	7.5708333333333333	5.39		0		0	0	170	76.4	1	21	2	2	7	1	2137-08-24 15:00:00.000000	7.7	311	1.5	26	0.95		143	8.3	7.175000000000001	280	1.125	21	1.3350000000000002		139.5	7.625	1	0	0	0	4974.171233768575
17572795	29211352	32513583	M	76.8269927122899946	MARRIED	WHITE	Medicare	English	2179-11-16 14:45:00.000000	2179-10-29 18:41:00.000000	2179-11-08 10:26:30.000000	2179-11-13 18:24:50.000000	17.8361111111111111	5.33		0		0	0	173	87.5	1	50	9	1	7	1	2179-11-10 03:00:00.000000	6	204	1	24			136	10.7	6.833333333333333	120.14285714285714	0.8666666666666667	19.333333333333332			135.875	8.014285714285716	1	0	1	1	5672.814045513049
18075452	24802144	32522371	M	31.904755005661391	SINGLE	WHITE	Medicaid	English	2123-01-04 18:57:00.000000	2122-11-27 16:43:00.000000	2122-12-06 18:45:32.000000	2123-01-05 03:26:17.000000	38.0930555555555556	29.36	2123-01-04	1	38	0	1	183	61.7	1	38	11	3	3	2	2122-12-09 19:00:00.000000	11	29	1.4	32	0.08		132	9	14.375	111.8	1.1599999999999997	25.2	0.12200000000000003		132.8	8.725000000000001	1	0	1	1	3736.2261662334204
14879136	20527273	32523157	M	45.0212102904071517	MARRIED	WHITE	Private	English	2166-03-06 11:35:00.000000	2166-01-08 23:44:00.000000	2166-01-14 10:11:10.000000	2166-02-06 11:54:05.000000	56.4937	23.07		0		0	0		88.8	1	43	15	3	3	1	2166-01-18 04:49:00.000000	9.4	177	1.9	28	0.01		129	9.2	16.014285714285716	119.71428571428571	1.525	19.625	0.01		126.83333333333333	8.821428571428571	1	0	1	1	13156.191857011989
15098455	26548797	32528130	M	64.77123523581625333341	MARRIED	UNKNOWN	Private	English	2151-10-18 18:35:00.000000	2151-10-09 16:30:00.000000	2151-10-09 17:32:00.000000	2151-10-14 12:08:34.000000	9.0868055555555556	4.78		0		0	0		83.5	1	105	13	3	5	1	2151-10-13 18:00:00.000000	22.4	174	1	20	7.85		133	13.5	18	163.66666666666666	0.7000000000000001	19	11.676666666666668		130.16666666666666	13.799999999999999	1	0	1	1	3514.1417873948812
18687658	28203176	32528850	M	68.52050725576771321784	MARRIED	WHITE	Private	English	2125-08-09 17:00:00.000000	2125-07-10 02:40:00.000000	2125-07-10 04:27:00.000000	2125-07-15 21:49:30.000000	30.5972222222222222	5.72		0		0	0		67.7	1	69	2	4	4	2	2125-07-11 15:00:00.000000	23.1	402	1.1	21	0.32	8188	129	11.5	26.629999999999995	249	1.9363636363636365	37.54545454545455	0.305	8188	131.71428571428572	8.721428571428572	0	0	0	0	1819.9999982118607
13800450	29965349	32534625	M	67.67831548823945645779	MARRIED	WHITE	Medicare	English	2160-09-15 14:20:00.000000	2160-09-04 17:59:00.000000	2160-09-04 17:59:55.000000	2160-09-09 17:54:28.000000	10.8479166666666667	5		0		0	0	178	132	1	45	11	3	4	2	2160-09-06 03:00:00.000000	13.6	114	1.6	22	0.03		139	14.4	11.35	117.5	1.5333333333333332	24.333333333333332	0.025		140	13.8	1	0	1	1	441.42815905995667
17561108	27158008	32548095	M	69.2863845523424652	MARRIED	WHITE	Medicare	English	2157-04-27 16:15:00.000000	2157-04-14 20:12:00.000000	2157-04-14 22:25:00.000000	2157-04-18 08:39:48.000000	12.8354166666666667	3.43	2163-03-28	0	2174	0	0		90.1	1	45	2	2	7	1	2157-04-17 06:00:00.000000	9.5	153	1.5	54	0.06		142	7.8	9.5	153	1.5	54	0.06		142	7.8	0	0	0	0	1002.9080187007785
19177604	24534998	32562992	M	70.6887408439701166	MARRIED	WHITE	Medicare	English	2186-09-16 14:30:00.000000	2186-09-08 23:27:00.000000	2186-09-08 23:28:38.000000	2186-09-16 16:03:27.000000	7.6270833333333333	7.69	2186-09-16	1	8	1	1	173	88	1	32	14	2	7	3	2186-09-10 04:30:00.000000	9.3	115	0.8	24			133	8.6	9	114.5	0.8666666666666667	23			134.33333333333334	8.45	1	0	1	1	2456.81
17680509	25160906	32566576	F	82.23243341248937538521	MARRIED	WHITE	Medicare	English	2181-04-24 14:26:00.000000	2181-03-26 21:28:00.000000	2181-03-26 21:28:34.000000	2181-04-02 15:44:43.000000	28.7069444444444444	6.76	2183-12-22	0	1001	0	0	150	58.8	1	51	7	3	5	2	2181-03-28 08:00:00.000000	26	615	0.4	36		3457	140	12.2	24.1	601.5	0.4000000000000001	35		3457	140.33333333333334	11.5	1	0	1	1	3440.5722571983933
12572459	21324979	32575066	F	66.5562769950395141	MARRIED	BLACK/AFRICAN AMERICAN	Private	English	2179-07-26 17:19:00.000000	2179-07-23 15:50:00.000000	2179-07-23 15:50:37.000000	2179-07-26 17:43:50.000000	3.0618055555555556	3.08		0		0	0	170	78.4	1	29	4	2	5	2	2179-07-25 06:00:00.000000	10.3	328	0.8	17	0.6		137	11.3	11.100000000000001	279.6666666666667	0.75	16.5	0.5399999999999999		137	10.600000000000001	0	0	1	1	2122.1847333982587
13312464	20856961	32578141	F	87.0150100633430864	SINGLE	WHITE	Medicare	English	2148-01-17 18:00:00.000000	2148-01-06 17:23:00.000000	2148-01-06 17:24:44.000000	2148-01-15 01:45:49.000000	11.0256944444444444	8.35	2148-03-20	0	74	0	1	165	60	1	60	11	4	5	3	2148-01-08 00:01:00.000000	13.6	245	1	14	0.04		138	8.9	13.6	245	1.05	14	0.045		137.5	8.9	0	0	1	1	2643.434816852212
14342142	26042833	32596594	F	74.36961795193323878415	MARRIED	WHITE	Medicare	English	2137-05-24 19:03:00.000000	2137-05-16 00:00:00.000000	2137-05-16 17:53:35.000000	2137-05-20 22:46:21.000000	8.79375	4.2		0		0	0	168	89.2	1	39	4	2	4	2	2137-05-17 23:00:00.000000	9.9	230	1	50		22589	137	12.6	9.4	214.5	0.9	46		22589	139.33333333333334	12.5	0	0	1	1	1069.7605969309807
17501806	25851598	32596846	M	67.29493953476203600779	MARRIED	WHITE	Medicare	English	2120-05-17 14:00:00.000000	2120-04-17 17:23:00.000000	2120-04-17 18:14:00.000000	2120-05-15 18:49:18.000000	29.8590277777777778	28.02		0		0	0	175	97.7	1	53	5	1	6	2	2120-04-20 04:04:00.000000	7.1	157	1	18			141	12.5	7.699999999999999	168.33333333333334	0.95	18			141.33333333333334	12.266666666666666	1	0	0	0	1641.2499964237213
17722165	25210199	32632298	M	58.1494766179379394727	MARRIED	OTHER	Other	English	2111-03-02 12:08:00.000000	2111-02-24 14:17:00.000000	2111-02-24 14:18:32.000000	2111-02-27 19:38:30.000000	5.9104166666666667	3.22		0		0	0	180	80.4	1	17	7	3	3	2	2111-02-25 15:00:00.000000	6.8	183	0.8	17			137	14.3	11	150.66666666666666	0.75	17.5			136.4	11.512500000000001	1	0	1	1	1590.789104476571
14553780	27610810	32633070	M	91.87473206501138666662	MARRIED	WHITE	Medicare	English	2177-12-08 14:00:00.000000	2177-11-16 11:44:00.000000	2177-11-16 11:44:41.000000	2177-11-20 18:48:38.000000	22.0944444444444444	4.29	2178-08-03	0	260	0	1		88	0	33	3	1	7	0		8.9	263	1.3	28	1.28	20730	136	9.2	11.639999999999999	293.4	1.3749999999999998	27.5	0.752	20730	131	9.139999999999999	0	0	0	0	1548.9166249111295
19435986	24100625	32635106	M	52.45882060539465766685	SINGLE	WHITE		English	2148-06-26 19:00:00.000000	2148-06-16 13:56:00.000000	2148-06-21 11:36:43.000000	2148-06-24 11:56:51.000000	10.2111111111111111	3.01		0		0	0	178	65	1	29	7	1	4	1	2148-06-24 04:00:00.000000	8.8	292	0.7	17	0.05		141	11.9	8.600000000000001	312.5	0.7	16.5	0.04		139.5	12.25	1	0	1	1	509.4387961290777
19585869	20562280	32653893	F	76.2547372700839443	WIDOWED	BLACK/AFRICAN AMERICAN	Medicare	English	2152-04-12 16:29:00.000000	2152-04-03 05:15:00.000000	2152-04-03 08:01:17.000000	2152-04-07 22:21:40.000000	9.4680555555555556	4.6	2152-08-09	0	128	0	1		77.4	1	36	4	2	6	2	2152-04-04 12:00:00.000000	6.4	91	0.8	36			141	9.5	6.4	91	0.8500000000000001	36.5			138.5	9.5	0	0	0	0	2450.000044107437
16658981	24628310	32660887	F	54.9657514743649416	SINGLE	BLACK/AFRICAN AMERICAN	Medicaid	English	2122-01-03 04:55:00.000000	2121-12-18 23:24:00.000000	2121-12-19 03:28:01.000000	2121-12-24 09:00:25.000000	15.2298611111111111	5.23	2122-01-03	1	16	1	1		71	1	79	8	3	6	2	2121-12-20 04:55:00.000000	7.5	143	0.7	24	0.1		129	7.8	7.5	143	0.8	22	0.1		130	7.8	0	0	1	1	1260.833332106471
17413144	27021902	32682150	F	56.71587810273736317291		UNABLE TO OBTAIN	Private	English	2151-09-25 16:00:00.000000	2151-09-19 11:15:00.000000	2151-09-19 11:16:00.000000	2151-09-23 00:59:42.000000	6.1979166666666667	3.57		0		0	0	165	80.7	1	24	5	2	2	2	2151-09-21 11:11:00.000000	9.9	336	0.5	18			135	12.1	9.5	326	0.5	17.5			135	12.05	1	0	0	0
12430823	25506857	32686216	M	83.5054954432038667	MARRIED	WHITE	Medicare	English	2117-07-14 19:50:00.000000	2117-07-04 08:30:00.000000	2117-07-04 19:04:02.000000	2117-07-14 20:11:49.000000	10.4722222222222222	10.05	2117-09-02	0	60	0	1		73	1	34	5	2	8	3	2117-07-08 20:24:00.000000	8.3	295	0.7	13			134	6.5	10.100000000000001	301	0.7	12.5			134	7.35	0	0	0	0
15227532	28473820	32688143	F	77.0040574316328473846	MARRIED	WHITE	Medicare	English	2126-01-13 15:40:00.000000	2126-01-02 11:34:00.000000	2126-01-05 10:33:48.000000	2126-01-10 16:46:22.000000	11.1708333333333333	5.26		0		0	0	165	83	1	40	8	2	5	3	2126-01-07 05:00:00.000000	12.1	196	1.5	46			135	14.2	9.675	170.25	1.3166666666666667	36.166666666666664			129.83333333333334	14	0	0	1	1	590
12679486	24648277	32699652	F	78.9341619163915066	MARRIED	WHITE	Medicare	English	2163-12-23 14:58:00.000000	2163-12-08 16:18:00.000000	2163-12-08 17:26:00.000000	2163-12-14 13:05:49.000000	14.9444444444444444	5.82		0		0	0	150	48.5	1	33	5	2	5	2	2163-12-10 23:01:00.000000	9.3	482	1.1	26			138	10.1	14.125	535.75	1	27.4			145.2	13	0	0	0	0	250
19386153	24165662	32708262	M	61.97723640155781037717	MARRIED	UNKNOWN	Other	English	2134-01-06 15:50:00.000000	2133-12-23 22:16:00.000000	2133-12-23 22:17:28.000000	2133-12-28 16:20:16.000000	13.7319444444444444	4.75		0		0	0		105.3	0	30	4	3	6	0		7	209	2.7	27	1.1		146	12.6	11.64	212	2.575	42.75	1.73		138.27272727272728	9.722222222222223	0	0	1	1	1559.220216460526
12054398	22968742	32713223	F	43.2848491928334881774		UNKNOWN	Medicaid	English	2155-04-20 17:31:00.000000	2155-04-15 00:56:00.000000	2155-04-15 02:16:00.000000	2155-04-20 15:46:56.000000	5.6909722222222222	5.56		0		0	0	170	230	1	59	8	2	1	2	2155-04-18 18:00:00.000000	13.8	436	2.9	81	0.02	8657	134	8.3	12.766666666666666	355	2.7	77.4	0.015	8657	136.8	8.000000000000002	1	0	1	1	4030.290126638487
18570152	20563634	32714148	M	60.6136837585308736	MARRIED	WHITE	Private	English	2201-08-17 12:30:00.000000	2201-08-13 15:03:00.000000	2201-08-13 16:49:00.000000	2201-08-16 22:05:05.000000	3.89375	3.22		0		0	0		116	1	38	2	0	6	2	2201-08-15 20:00:00.000000	5.3	166	1.4	27			138	12.9	5.3	166	1.4	27			138	12.9	0	0	0	0	730
19960105	27716181	32729140	F	66.6536980960568609	MARRIED	WHITE	Private	English	2147-09-09 13:30:00.000000	2147-08-28 00:00:00.000000	2147-08-29 00:57:00.000000	2147-09-09 13:59:34.000000	12.5625	11.54	2147-12-29	0	123	0	1	163	58.9	1	36	2	3	3	2	2147-08-30 10:00:00.000000	9.5	413	0.8	20	0.05		139	9.5	8.5	412.5	0.8	20	0.035		138	9.25	1	0	0	0	2562.000005722046
16480196	21660711	32736550	M	83.74155552270062649482	SINGLE	WHITE	Medicare		2116-10-25 13:16:00.000000	2116-09-27 20:20:00.000000	2116-09-27 22:50:00.000000	2116-10-10 20:12:21.000000	27.7055555555555556	12.89		0		0	0	178	95	1	39	5	2	8	2	2116-10-02 09:00:00.000000	7	317	0.6	24	0.01		140	10.1	7.25	310	0.7	24	0.01		139	10	1	0	0	0	297.16666926443577
14525100	20207458	32748360	M	69.66482557379004118426	MARRIED	WHITE	Medicare	English	2130-09-13 15:45:00.000000	2130-08-31 19:44:00.000000	2130-09-08 09:15:29.000000	2130-09-11 17:39:05.000000	12.8340277777777778	3.35		0		0	0	180	79.9	1	30	6	3	5	2	2130-09-09 12:00:00.000000	12	325	1.1	14	0.08		139	12.7	11.357142857142858	237.85714285714286	1.0166666666666668	17.666666666666668	0.08		138.44444444444446	10.107692307692306	1	0	1	1	6735.083677468821
12019744	22874241	32754943	M	70.94986109666102657051	MARRIED	UNKNOWN	Medicare	English	2186-12-31 17:30:00.000000	2186-12-13 22:18:00.000000	2186-12-25 08:58:52.000000	2186-12-31 19:17:36.000000	17.8	6.43	2186-12-31	1	18	1	1		126.8	1	19	4	1	9	2	2186-12-27 03:00:00.000000	11.5	173	0.9	16			139	10.9	10.666666666666666	208.33333333333334	0.76	12.2			137	8.716666666666667	1	0	1	1	6718.249826529995
19597377	27456898	32760073	F	92.3569523007272499	WIDOWED	WHITE	Medicare	English	2186-05-22 17:13:00.000000	2186-05-11 14:47:00.000000	2186-05-18 19:08:24.000000	2186-05-22 17:14:00.000000	11.1013888888888889	3.92	2186-09-02	0	114	0	1	157	43.2	1	46	4	3	7	2	2186-05-19 21:00:00.000000	12.3	191	0.8	25	8.09		138	12.2	12.3	191	0.8	25	8.09		138	12.2	0	0	0	0	1050.000002682209
18314604	20760975	32768155	M	85.309226105188097511	MARRIED	WHITE	Medicare	English	2174-04-30 16:11:00.000000	2174-04-23 22:37:00.000000	2174-04-24 01:21:00.000000	2174-04-30 16:19:54.000000	6.7319444444444444	6.62	2174-05-01	0	8	1	1	183	75.9	1	51	9	3	8	2	2174-04-26 05:18:00.000000	21.4	196	1.3	32	0.64		138	10.7	18.15	184.5	1.25	29.5	4.11		138	10.1	1	0	1	1	1711.2618798948824
16333496	25737846	32770663	M	88.55485472645533646185		UNKNOWN	Medicare	English	2175-07-31 06:58:00.000000	2175-07-22 15:45:00.000000	2175-07-22 15:45:46.000000	2175-07-31 10:47:16.000000	8.6340277777777778	8.79	2175-07-31	1	9	1	1	175	71.5	1	36	9	2	9	3	2175-07-24 12:46:00.000000	11.1	125	1.2	32	2	15951	138	11.8	10.55	120	1.0999999999999999	31.666666666666668	2.22	15951	138.33333333333334	11.700000000000001	0	0	1	1	601
17140859	28385820	32772613	M	63.2115341031121527	SINGLE	WHITE	Medicare	English	2186-03-23 16:48:00.000000	2186-03-18 17:53:00.000000	2186-03-18 18:57:00.000000	2186-03-22 03:03:15.000000	4.9548611111111111	3.34	2186-06-12	0	86	0	1	183	95.6	1	64	6	4	8	1	2186-03-21 20:00:00.000000	14.7	233	1.6	34	0.01	6317	135	10.9	14.7	232	1.5333333333333332	32	0.01	6317	135.33333333333334	10.9	0	0	1	1	3269.5781078636646
14157647	24683197	32783416	M	89.0420653368938342	WIDOWED	WHITE	Medicare	English	2174-01-30 14:39:00.000000	2174-01-15 18:49:00.000000	2174-01-15 18:50:05.000000	2174-01-19 04:43:03.000000	14.8263888888888889	3.41	2174-01-30	1	15	1	1	183	94.5	1	35	5	3	14	2	2174-01-17 12:12:00.000000	11.1	192	1.1	33	0.07	11422	143	9	11.133333333333333	172.5	1.3400000000000003	38	0.065	11422	138.8	8.766666666666667	0	0	0	0
16613165	23716232	32794463	F	68.95247542116672720492	MARRIED	WHITE	Medicare	English	2118-12-25 17:26:00.000000	2118-12-14 21:13:00.000000	2118-12-20 09:46:42.000000	2118-12-23 18:30:13.000000	10.8423611111111111	3.36		0		0	0	170	66	1	26	5	4	4	1	2118-12-22 10:04:00.000000	5.9	179	0.8	12			142	12.4	12.350000000000001	140.71428571428572	0.7	11.25			140.25	9.708333333333334	1	0	0	0
12608402	29565602	32807084	F	71.97679529371393943376	SINGLE	PATIENT DECLINED TO ANSWER	Private	English	2149-01-20 19:47:00.000000	2148-12-22 18:24:00.000000	2148-12-22 19:59:00.000000	2149-01-06 18:26:26.000000	29.0576388888888889	14.94	2150-05-24	0	518	0	0		61.4	1	42	6	2	7	3	2148-12-24 04:00:00.000000	5.8	97	0.4	4			135	7.1	5.3	92.25	0.4666666666666666	3.6666666666666665			135.66666666666666	6.833333333333333	0	0	1	1	4957.146663669497
17584280	28461049	32814893	M	67.93762795930126083832	DIVORCED	WHITE	Medicare	English	2133-12-17 17:08:00.000000	2133-12-09 11:04:00.000000	2133-12-09 11:07:12.000000	2133-12-12 22:08:11.000000	8.2527777777777778	3.46		0		0	0	178	84	1	23	9	3	4	2	2133-12-11 02:00:00.000000	14.5	155	0.8	11			138	10.1	12.666666666666666	137.33333333333334	0.8500000000000001	10			140	9.833333333333334	1	0	1	1	10401.812349379063
15210676	29555928	32820727	M	64.91859757822667345669	SINGLE	WHITE	Private	English	2157-12-15 12:30:00.000000	2157-12-02 12:15:00.000000	2157-12-05 10:49:45.000000	2157-12-09 17:48:30.000000	13.0104166666666667	4.29		0		0	0	178	98	1	29	8	3	4	2	2157-12-07 21:00:00.000000	19.8	207	1.3	24			136	13.3	17.46666666666667	206.66666666666666	1.2000000000000002	20			134.75	10.36	1	0	1	1	16288.255293525755
11304465	23251479	32831140	M	65.13334766173295148605	SINGLE	WHITE	Medicare	English	2115-03-07 11:41:00.000000	2115-02-18 16:54:00.000000	2115-02-22 23:03:06.000000	2115-03-02 16:35:11.000000	16.7826388888888889	7.73	2115-04-28	0	69	0	1	170	61.3	1	50	2	2	8	1	2115-02-24 22:20:00.000000	10.8	178	1	36		1584	139	16	10.350000000000001	169.5	0.95	35.75		1584	137.25	14.3	0	0	0	0
16537903	20863515	32831858	F	76.72256506949121708651		UNABLE TO OBTAIN	Medicare	English	2138-12-02 13:45:00.000000	2138-09-21 21:52:00.000000	2138-10-07 08:27:14.000000	2138-10-15 22:58:34.000000	71.6618055555555556	8.61		0		0	0		54	1	72	5	1	7	2	2138-10-10 02:00:00.000000	11.3	139	3.2	123	0.05		150	11.4	9.266666666666667	238.33333333333334	1.5599999999999998	64.2	0.045		139.4	8.322222222222223	0	0	0	0
11851243	29756779	32839318	M	70.13292936981203938454	MARRIED	WHITE - RUSSIAN	Medicare	English	2123-02-28 16:25:00.000000	2123-02-18 13:14:00.000000	2123-02-18 14:41:00.000000	2123-02-25 18:43:33.000000	10.1326388888888889	7.17	2123-03-09	0	19	1	1	157	80	0	60	11	3	6	0		12.3	123	2.1	48			123	8.8	10.566666666666666	125.33333333333333	1.725	42			131	9	1	0	1	1	4250.704751714133
16632367	29956550	32857677	M	61.17468250882672006201	SINGLE	WHITE	Private	English	2126-03-18 15:31:00.000000	2126-03-05 19:14:00.000000	2126-03-05 21:07:50.000000	2126-03-10 12:57:43.000000	12.8451388888888889	4.66		0		0	0	180	95	1	32	2	3	10	3	2126-03-07 02:00:00.000000	5	218	1.2	25			136	11.8	5	218	1.2	25.5			135.5	11.8	0	0	0	0	1319.9999976158142
15831913	27018591	32869188	M	69.5027612590495556	MARRIED	WHITE	Medicare	English	2135-07-21 17:30:00.000000	2135-07-03 20:55:00.000000	2135-07-03 21:04:00.000000	2135-07-11 22:11:52.000000	17.8576388888888889	8.05	2139-12-10	0	1621	0	0	175	74.7	1	39	10	3	6	2	2135-07-05 15:00:00.000000	11.1	284	1.4	32	0.15	7765	139	11.5	10.37142857142857	233.14285714285714	1.075	27.5	0.16666666666666666	7765	138.33333333333334	9.375	1	0	1	1	6308.02
11389801	28171818	32886586	F	63.4181609575143178	MARRIED	WHITE	Private	English	2152-06-17 16:27:00.000000	2152-06-02 04:22:00.000000	2152-06-05 08:46:12.000000	2152-06-08 18:55:40.000000	15.5034722222222222	3.42		0		0	0		80	1	37	3	3	5	1	2152-06-07 09:00:00.000000	25.9	254	1.1	15	12.74		142	13.4	23.619999999999997	267	0.8250000000000001	15.75	12.74		137.25	11.299999999999999	0	0	0	0	1827.0000019967556
12567919	22553211	32906557	F	87.5099055329525812	WIDOWED	ASIAN	Medicare	English	2187-07-11 17:00:00.000000	2187-07-06 17:21:00.000000	2187-07-06 17:25:42.000000	2187-07-11 17:43:25.000000	4.9854166666666667	5.01	2190-06-15	0	1075	0	0	152	68.8	1	28	6	2	6	3	2187-07-08 14:00:00.000000	5.7	158	1.2	37			141	14.9	5.7	158	1.2	37			141	14.9	0	0	0	0	540
12748237	26751890	32911765	F	67.14447993080995309655	SINGLE	WHITE	Medicare	English	2154-03-15 10:09:00.000000	2154-02-22 18:29:00.000000	2154-02-22 20:39:20.000000	2154-02-27 13:22:04.000000	20.6527777777777778	4.7	2154-03-15	1	21	1	1		79	0	24	4	2	5	0		9.2	74	0.7	31			144	5.3	10.433333333333334	62.166666666666664	0.6571428571428573	38.857142857142854			144.14285714285714	6.533333333333334	0	0	0	0
10258162	21744088	32917252	F	87.0608130286829615	MARRIED	WHITE	Medicare	English	2151-02-25 21:05:00.000000	2151-01-23 10:53:00.000000	2151-01-23 12:25:00.000000	2151-02-04 16:38:55.000000	33.425	12.18	2151-02-25	1	33	0	1	152	40	1	51	11	3	6	2	2151-01-27 16:00:00.000000	14	273	0.4	28	0.15		140	9	14	273	0.4	26.5	0.15		139	9	1	0	1	1	3461.5166630800813
17984620	27420781	32920411	M	87.25673427176745524581	WIDOWED	WHITE	Medicare	English	2141-04-22 19:01:00.000000	2141-04-04 18:29:00.000000	2141-04-04 20:14:00.000000	2141-04-12 16:13:12.000000	18.0222222222222222	7.83	2141-05-08	0	34	0	1		59.4	1	35	2	3	8	1	2141-04-06 08:58:00.000000	12	332	1.1	33	0.71		135	7.1	16.2	371	1.1	33	0.71		135	7.55	0	0	0	0	670.5169622972608
14810971	23543121	32930311	F	57.69634196870385479582	MARRIED	UNKNOWN	Private	English	2183-09-26 16:37:00.000000	2183-09-12 08:00:00.000000	2183-09-15 21:26:58.000000	2183-09-23 15:41:27.000000	14.3590277777777778	7.76		0		0	0	160	65	1	59	7	3	4	2	2183-09-17 23:00:00.000000	7.3	351	0.7	22	0.09		139	8.6	7.56	426.2	0.6666666666666666	20.5	0.14666666666666667		137.85714285714286	8.5	1	0	1	1	4142.684871087782
12553696	24911675	32933740	M	65.0776269188951739	MARRIED	WHITE	Private	English	2160-02-05 18:15:00.000000	2160-01-29 11:58:00.000000	2160-01-29 17:40:35.000000	2160-02-02 11:42:31.000000	7.2618055555555556	3.75		0		0	0	180	112.4	1	49	8	2	6	2	2160-01-31 22:00:00.000000	11.4	160	1.4	32		2638	137	15.5	9.799999999999999	154.33333333333334	1.4000000000000001	30.5		2638	138.33333333333334	15.566666666666668	1	0	0	0
19061908	24884792	32936736	M	74.7992820133257159	WIDOWED	BLACK/AFRICAN AMERICAN	Medicaid	English	2170-11-03 18:38:00.000000	2170-10-19 20:49:00.000000	2170-10-20 16:55:42.000000	2170-10-24 09:15:08.000000	14.9090277777777778	3.68		0		0	0		71.9	1	37	4	3	4	3	2170-10-23 00:00:00.000000	7.4	263	1	18			138	11.4	8.95	261.5	1.0333333333333334	17.666666666666668			138.33333333333334	11	0	0	0	0
18175636	28544505	32937083	F	94.8148698518911966	WIDOWED	WHITE	Medicare	English	2129-11-11 13:35:00.000000	2129-10-25 08:25:00.000000	2129-10-25 10:37:00.000000	2129-11-05 16:33:25.000000	17.2152777777777778	11.25		0		0	0		70.9	1	66	6	2	5	3	2129-10-30 08:00:00.000000	10.6	164	1	59			144	10.3	11.714285714285714	213.71428571428572	0.7999999999999999	41.666666666666664			142	8.485714285714286	0	0	1	1	499.9999809265137
16376326	25581876	32941394	M	77.66442629513826145101		WHITE	Medicare	English	2140-09-07 00:50:00.000000	2140-08-30 16:14:00.000000	2140-08-30 17:55:00.000000	2140-09-07 02:58:32.000000	7.3583333333333333	7.38	2140-09-07	1	8	1	1		22.7	1	36	8	3	7	2	2140-09-02 15:18:00.000000	9.4	223	1.1	29	0.02		143	10.9	9.45	223.5	1.1333333333333335	29.666666666666668	0.015		143.33333333333334	11.100000000000001	0	0	0	0
12135384	22222753	32943521	M	72.77083595716447360015	MARRIED	WHITE	Private	English	2131-10-23 17:20:00.000000	2131-10-09 13:00:00.000000	2131-10-11 08:44:54.000000	2131-10-18 16:32:59.000000	14.1805555555555556	7.33	2132-01-02	0	85	0	1		77	1	28	5	2	6	2	2131-10-12 14:24:00.000000	13.9	171	0.9	16		8258	142	9.3	13.266666666666667	148.66666666666666	0.8666666666666667	16.666666666666668		8258	142	8.5	0	0	0	0	783.1999886780977
11482582	22946206	32951006	F	50.9628282983154548	SINGLE	WHITE	Medicare	English	2128-03-09 19:20:00.000000	2127-12-18 15:12:00.000000	2128-02-27 11:40:19.000000	2128-03-09 19:58:55.000000	82.1722222222222222	11.35	2129-02-13	0	423	0	0	152	290	0	24	5	2	4	0		11.7	254	0.7	23			139	11.6	14.363636363636367	328.09090909090907	1.275	30.166666666666668			141.08333333333334	10.127272727272727	1	0	0	0	1407.7000322192907
19986880	28386154	32959861	F	78.58129267718389451377	WIDOWED	UNKNOWN	Medicare	English	2185-08-10 15:11:00.000000	2185-08-01 07:30:00.000000	2185-08-01 11:16:04.000000	2185-08-10 16:30:44.000000	9.3201388888888889	9.22	2185-08-10	1	9	1	1	160	57	1	97	18	4	7	3	2185-08-02 19:00:00.000000	18.9	194	1.2	46			129	9.5	19.833333333333332	209.66666666666666	1.15	41			133.2	9.174999999999999	1	1	1	1	10189.68522561714
15527518	25549682	32995342	F	78.4166085621161981	WIDOWED	BLACK/AFRICAN AMERICAN	Medicare	English	2129-07-13 18:01:00.000000	2129-06-01 20:34:00.000000	2129-06-20 20:07:19.000000	2129-07-01 03:38:40.000000	41.8937	10.31		0		0	0		70.7	1	31	8	3	8	2	2129-06-21 23:00:00.000000	6.3	225	0.7	7			135	9.3	10.819999999999999	340.2	0.6625	6.25			131.625	8.6	1	0	1	1
14680297	24205332	32996688	F	53.54096553335414145507	SINGLE	WHITE	Private	English	2186-07-27 14:24:00.000000	2186-07-17 14:00:00.000000	2186-07-18 16:45:11.000000	2186-07-22 18:22:33.000000	10.0166666666666667	4.07		0		0	0	165	56.6	1	27	4	3	5	2	2186-07-20 00:00:00.000000	6.9	174	0.8	15			139	11.3	12.850000000000001	173.25	0.8500000000000001	15			136.42857142857142	9.711111111111112	1	0	1	1	7802.498581163585
19131119	27251638	33002352	M	68.2872107929658814	SINGLE	HISPANIC/LATINO - PUERTO RICAN	Medicare	Spanish	2135-05-12 11:35:00.000000	2135-04-15 20:52:00.000000	2135-04-15 20:52:46.000000	2135-04-23 18:09:13.000000	26.6131944444444444	7.89	2142-11-03	0	2759	0	0		82.5	1	35	3	2	7	2	2135-04-17 20:06:00.000000	11.6	187	0.8	11			138	14.8	11.6	187	0.8	11			138	14.8	0	0	0	0	1822.9924444556236
12729806	25659670	33007163	M	83.6241271388406712	MARRIED	WHITE	Medicare	English	2133-08-26 17:30:00.000000	2133-08-16 14:52:00.000000	2133-08-16 14:53:43.000000	2133-08-26 20:18:31.000000	10.1097222222222222	10.23	2133-08-26	1	10	1	1	173	111	1	78	13	2	6	2	2133-08-21 15:44:00.000000	10	122	2.2	77	0.04	8187	138	7.8	11.125	128.75	2.075	72.5	0.04	8187	139.75	7.9	1	0	1	1	2440.8470971081406
15462072	22854831	33009070	F	64.56524547803617571059	DIVORCED	UNKNOWN	Medicare	English	2166-08-04 15:45:00.000000	2166-07-26 10:50:00.000000	2166-07-26 10:51:12.000000	2166-08-04 15:56:18.000000	9.2048611111111111	9.21	2166-10-07	0	73	0	1	160	56.7	1	41	4	3	6	2	2166-07-29 02:00:00.000000	12.2	282	1.2	29	0.03		135	11.3	11.05	293.5	1.05	25	0.03		133.5	11.65	0	0	1	1	1892.7838003374636
12420873	21393839	33030114	M	50.0745501916841741	SINGLE	BLACK/AFRICAN AMERICAN		English	2141-02-09 17:19:00.000000	2141-01-27 22:55:00.000000	2141-01-28 00:48:00.000000	2141-01-31 16:42:10.000000	12.7666666666666667	3.66		0		0	0	173	73.7	1	57	6	4	4	3	2141-01-31 14:00:00.000000	11.6	142	1.1	19			141	10.4	11.5	147.5	0.8666666666666667	16.333333333333332			139.66666666666666	10.5	0	0	0	0	11456.314231358469
11900074	24138768	33035558	M	44.1189860269203554	SINGLE	OTHER	Other	Spanish	2135-02-23 17:42:00.000000	2135-02-13 16:49:00.000000	2135-02-13 18:20:00.000000	2135-02-17 16:21:15.000000	10.0368055555555556	3.92		0		0	0		62.8	1	76	11	3	1	1	2135-02-17 00:00:00.000000	3.2	215	0.8	33			138	15.7	3.575	187.25	0.7749999999999999	30.75			136.75	15.075	1	0	1	1	14029.580761153251
15410770	21793637	33055754	M	92.3850824324085888	MARRIED	WHITE	Medicare	English	2152-05-25 23:29:00.000000	2152-05-20 21:22:00.000000	2152-05-20 22:30:44.000000	2152-05-24 03:00:45.000000	5.0881944444444444	3.19	2152-05-25	1	5	1	1		63.3	0	30	3	1	6	0		6.9	98	1	23			120	12.4	6.9	98	0.95	20.5			123.66666666666667	12.4	0	0	0	0	1699.9999976158142
12363362	28796729	33060771	F	67.0733741069087223144	MARRIED	WHITE	Medicare	English	2144-02-10 14:10:00.000000	2144-01-27 19:11:00.000000	2144-01-28 20:26:57.000000	2144-01-31 21:45:01.000000	13.7909722222222222	3.05		0		0	0		74	1	37	3	3	5	2	2144-01-30 17:30:00.000000	24.6	235	1.1	26			140	13.6	34.98	186	1.025	23.25			135	9.729999999999999	0	0	0	0	2322.627065030858
12430823	21741566	33066729	M	83.5758141177630174	MARRIED	WHITE	Medicare	English	2117-08-18 18:34:00.000000	2117-07-30 00:54:00.000000	2117-07-30 01:56:00.000000	2117-08-06 18:01:11.000000	19.7361111111111111	7.67	2117-09-02	0	34	0	1		71.1	1	57	3	3	7	2	2117-07-31 18:00:00.000000	17.4	296	0.9	31	0.01	1760	136	7.9	16.95	282	0.8500000000000001	30.5	0.01	1760	135.5	7.366666666666667	0	0	0	0
16229235	20408027	33085710	F	58.62864902661188411458	MARRIED	OTHER	Medicaid	Other	2138-08-27 16:08:00.000000	2138-08-18 14:37:00.000000	2138-08-18 14:37:37.000000	2138-08-24 10:05:32.000000	9.0631944444444444	5.81		0		0	0	157	57.8	1	35	1	3	4	1	2138-08-22 12:34:00.000000	21.5	316	0.8	17	24.31		134	12.8	21.9	287.5	0.75	15.5	12.056666666666665		134	11.8	0	0	0	0	3411.2499964237213
13916006	28736973	33121909	M	76.52760490913482628565	MARRIED	UNABLE TO OBTAIN	Medicare	English	2152-07-17 19:00:00.000000	2152-07-11 16:53:00.000000	2152-07-12 10:13:01.000000	2152-07-15 14:13:55.000000	6.0881944444444444	3.17		0		0	0	175	96	1	26	5	3	7	2	2152-07-13 12:00:00.000000	14.7	114	0.9	11			140	14.9	12.433333333333332	111.66666666666667	0.95	11			138	10.357142857142856	1	0	1	1	10343.445618070662
19729614	27136854	33122591	F	60.3512920505065439	SINGLE	WHITE	Medicare	English	2122-05-17 11:13:00.000000	2122-05-09 13:10:00.000000	2122-05-10 11:38:07.000000	2122-05-14 16:41:26.000000	7.91875	4.21	2124-05-21	0	743	0	0	157	54.3	1	42	2	3	5	1	2122-05-11 21:00:00.000000	14.9	293	1.1	19			138	8.4	14.9	293	1.1	19			137.5	8.4	0	0	0	0	989.9999916553497
16297706	23850824	33134105	M	91.18468348839034576162	MARRIED	WHITE	Medicare	English	2182-03-24 18:17:00.000000	2182-03-09 10:54:00.000000	2182-03-11 13:27:33.000000	2182-03-14 18:04:54.000000	15.3076388888888889	3.19		0		0	0		75.5	0	45	4	4	6	0		16.6	122	1.7	42	0.18	11710	143	12	16.05	158.75	1.6333333333333335	40	0.178	11710	143.33333333333334	12.15	1	0	0	0	760
10768463	29742449	33147066	M	76.46390475356065293696		UNKNOWN	Medicare	English	2187-06-25 16:50:00.000000	2187-06-19 10:30:00.000000	2187-06-20 11:57:07.000000	2187-06-23 18:31:10.000000	6.2638888888888889	3.27		0		0	0	173	78.5	0	27	9	2	7	0		18.9	176	1.2	12			140	12.9	19.4	166	1.2999999999999998	12			137.1	10.383333333333335	1	0	1	1	11284.909425966442
12678156	20410096	33153742	M	79.91652132923741884376	MARRIED	UNABLE TO OBTAIN	Medicare	English	2184-12-09 14:00:00.000000	2184-11-30 18:03:00.000000	2184-12-03 10:22:47.000000	2184-12-07 12:10:33.000000	8.83125	4.07		0		0	0	178	89	1	66	9	2	4	2	2184-12-04 17:56:00.000000	6.7	147	0.9	16			136	12	8.766666666666667	171.66666666666666	0.8500000000000001	14			136.25	9.487499999999999	1	0	1	1	8922.348775029182
12775544	29477666	33169895	F	82.41885281235150636808	SINGLE	WHITE	Private	English	2167-06-14 13:58:00.000000	2167-06-02 23:35:00.000000	2167-06-03 05:56:56.000000	2167-06-07 19:01:53.000000	11.5993055555555556	4.55		0		0	0		74	1	28	2	2	6	2	2167-06-06 01:00:00.000000	10.1	234	1.1	25			139	14.9	9.85	231	1.0999999999999999	25			142	14.850000000000001	0	0	0	0	319.9999976158142
11037500	27892535	33171868	M	64.40540662842109554153		UNKNOWN	Medicaid	English	2134-06-05 17:38:00.000000	2134-05-29 01:43:00.000000	2134-05-29 01:44:13.000000	2134-06-04 11:41:40.000000	7.6631944444444444	6.41		0		0	0	173	67	1	33	9	3	4	2	2134-05-30 05:00:00.000000	12.1	275	0.7	17	7.26		138	12.4	13.233333333333334	152.66666666666666	0.6499999999999999	16	7.26		135.2	8.930000000000001	1	0	0	0
11971516	29839057	33173159	M	76.24837793998377939984	DIVORCED	WHITE - OTHER EUROPEAN	Medicare	English	2145-04-06 18:30:00.000000	2145-04-01 17:14:00.000000	2145-04-01 17:14:57.000000	2145-04-04 22:41:13.000000	5.0527777777777778	3.23	2151-11-28	0	2432	0	0		102	1	27	3	3	7	2	2145-04-03 18:00:00.000000	11.2	158	0.6	11	0.66		143	11.2	11.8	153.5	0.6666666666666666	11.666666666666666	1.07		141.33333333333334	11.05	0	0	0	0	1313.2767930179834
14151543	24680617	33174695	F	66.74960003687053150149	MARRIED	UNKNOWN	Medicare	English	2116-10-09 14:04:00.000000	2116-09-30 18:51:00.000000	2116-09-30 18:52:05.000000	2116-10-04 00:39:42.000000	8.8006944444444444	3.24		0		0	0	165	112.5	1	41	6	1	6	2	2116-10-02 07:00:00.000000	8.3	275	1	12			121	12.1	7.8500000000000005	273	0.9333333333333332	12.333333333333334			132.66666666666666	11.399999999999999	1	0	0	0	4227.289565041661
15365664	22546291	33178915	F	82.39064092361289835841		UNABLE TO OBTAIN	Medicare	English	2132-05-25 18:00:00.000000	2132-05-22 16:17:00.000000	2132-05-22 16:17:49.000000	2132-05-25 18:21:34.000000	3.0715277777777778	3.09	2132-08-25	0	95	0	1	170	110	0	40	11	3	7	0		6.4	119	1	51			141	8.7	10.65	123.5	1.05	51			142	9.6	1	0	0	0	370.4749763831496
18906817	23143638	33188246	M	42.25691109517038627053	SINGLE	UNKNOWN		English	2143-04-15 16:21:00.000000	2143-04-04 20:02:00.000000	2143-04-07 12:06:37.000000	2143-04-11 21:41:17.000000	10.8465277777777778	4.4		0		0	0	180	100.7	1	26	5	4	3	2	2143-04-10 01:00:00.000000	13.3	298	0.8	13			138	14.2	16.48333333333333	213.83333333333334	0.7799999999999999	12.6			136	11.825000000000001	1	0	0	0
12301973	25371157	33208528	F	55.38660820922992305254	SINGLE	WHITE	Private	English	2185-06-09 14:33:00.000000	2185-05-22 04:56:00.000000	2185-05-22 10:55:22.000000	2185-05-26 17:01:08.000000	18.4006944444444444	4.25		0		0	0	152	86	1	33	7	2	2	2	2185-05-23 13:00:00.000000	19.6	140	1	14			138	12.6	18.433333333333334	145.33333333333334	0.9	14			137	10.271428571428572	1	0	1	1	4746.605865251273
12447650	25229846	33218257	F	78.67626395650007392359	WIDOWED	WHITE	Medicare	English	2161-09-25 16:17:00.000000	2161-09-05 00:00:00.000000	2161-09-05 16:27:59.000000	2161-09-17 18:22:55.000000	20.6784722222222222	12.08	2162-01-02	0	119	0	1	147	78	1	44	5	2	5	1	2161-09-12 04:00:00.000000	5.3	215	0.9	24		2815	144	8.9	5.15	213	0.9	24.5		2815	144	8.850000000000001	0	0	0	0	1547.7750207558274
10313626	25229838	33226289	M	61.763403974472937	MARRIED	HISPANIC/LATINO - CENTRAL AMERICAN	Medicaid	Spanish	2194-10-16 19:17:00.000000	2194-10-06 18:19:00.000000	2194-10-06 20:14:00.000000	2194-10-14 13:40:07.000000	10.0402777777777778	7.73		0		0	0	165	158.3	1	47	6	2	4	2	2194-10-09 08:04:00.000000	10.9	237	0.8	31			137	15.4	10.9	237	0.8	31			138	15.4	1	0	0	0	1533.9623743733391
17399377	27309502	33227606	F	66.3209128772460755	SINGLE	WHITE	Medicare	English	2172-05-12 18:47:00.000000	2172-04-27 21:43:00.000000	2172-04-27 22:40:00.000000	2172-05-08 21:57:14.000000	14.8777777777777778	10.97	2172-07-07	0	71	0	1	157	89	1	37	11	2	5	2	2172-04-29 16:11:00.000000	7.6	202	0.5	24			146	12.6	7.6	202	0.5666666666666668	23.333333333333332			144	12.6	1	0	1	1	289.9999988079071
15801921	21588798	33250069	M	45.3364162968966086	MARRIED	WHITE	Private	English	2141-05-08 15:00:00.000000	2141-05-03 13:37:00.000000	2141-05-03 13:38:45.000000	2141-05-06 17:32:39.000000	5.0576388888888889	3.16		0		0	0	178	67.3	1	43	3	3	2	1	2141-05-05 23:00:00.000000	11.7	163	1.3	33		3675	136	15.3	10.149999999999999	154.5	1.3	31		3675	137	15.000000000000002	0	0	0	0	2143.9922286868095
19686760	26258368	33266207	M	86.5755364479806083	WIDOWED	WHITE	Medicare	English	2166-08-13 06:00:00.000000	2166-07-30 10:51:00.000000	2166-07-30 12:03:00.000000	2166-08-02 13:36:20.000000	13.7979166666666667	3.06	2166-08-13	1	14	1	1		80	1	46	5	2	8	2	2166-08-02 01:00:00.000000	7.2	100	1.3	41	0.07		132	10.9	9	102.5	1.2	46.166666666666664	0.07		135.83333333333334	11.45	0	0	0	0	433.00000224262476
15331613	25231997	33271203	F	65.20692901327521661437	SINGLE	WHITE	Medicare	English	2183-04-08 16:48:00.000000	2183-03-17 13:54:00.000000	2183-03-17 13:56:14.000000	2183-03-20 17:30:30.000000	22.1208333333333333	3.15	2183-09-12	0	179	0	1		59.5	1	26	5	3	5	3	2183-03-19 08:00:00.000000	9.5	213	0.5	4			138	8.1	11.9	212.5	0.5	4.75			139	8.149999999999999	0	0	1	1	1688.6252078711987
13181627	24787003	33291189	M	20.88528442937985104549	SINGLE	UNKNOWN	Private	English	2119-11-27 18:44:00.000000	2119-11-20 08:14:00.000000	2119-11-20 09:24:00.000000	2119-11-23 21:24:24.000000	7.4375	3.5	2121-08-11	0	630	0	0	185	97.1	0	35	9	4	2	0		7.8	358	1.6	13	0.84	296	138	14.8	10.15	314.5	1.275	11.25	0.5633333333333334	296	134.5	14.4	1	0	1	1	6916.690168559551
17518372	29241068	33298459	F	71.3992796404697281	SINGLE	WHITE	Medicare	English	2190-06-03 20:00:00.000000	2190-05-27 01:49:00.000000	2190-05-27 04:11:00.000000	2190-06-01 22:05:24.000000	7.7576388888888889	5.75	2197-05-21	0	2551	0	0		147	1	49	7	3	4	2	2190-05-29 07:00:00.000000	8.5	201	1.1	26			139	10	11.95	232.75	1.1800000000000002	22.8			141.8	11.525	0	0	0	0	4970.833333730698
18020891	24538069	33301207	M	68.4167625695961703	MARRIED	WHITE	Private	English	2170-07-07 16:04:00.000000	2170-06-01 21:55:00.000000	2170-06-01 21:58:09.000000	2170-06-27 17:58:10.000000	35.7563	25.83		0		0	0	185	140	1	46	8	1	6	3	2170-06-03 01:00:00.000000	6.8	262	1.5	42			150	9.1	6.699999999999999	269.5	1.3666666666666665	39.666666666666664			149	8.95	1	0	1	1	3861.585861882195
14344243	29899161	33302469	M	80.38778703191612988405	MARRIED	WHITE	Medicare	English	2110-06-02 00:00:00.000000	2110-05-22 15:16:00.000000	2110-05-22 17:54:00.000000	2110-05-31 23:50:55.000000	10.3638888888888889	9.25	2110-06-02	1	11	1	1	175	61.2	1	59	14	3	7	3	2110-05-25 03:29:00.000000	1.3	22	0.9	39			141	6.1	1.3	22	0.9	39			141	6.1	1	0	1	1	1459.999985307455
18279857	25855512	33351826	M	75.72536382270750169294	MARRIED	WHITE	Medicare	English	2156-09-25 16:25:00.000000	2156-09-21 22:24:00.000000	2156-09-21 23:44:00.000000	2156-09-25 16:33:19.000000	3.7506944444444444	3.7	2156-10-17	0	26	1	1	178	61.6	1	33	1	2	11	2	2156-09-25 04:00:00.000000	8.1	242	0.6	18	0.02		127	10.4	8.1	242	0.55	19.5	0.02		129	10.4	0	0	0	0	932.4736220985651
18464006	29832980	33353143	F	80.0249542312585446	MARRIED	WHITE	Medicare	English	2151-01-26 19:00:00.000000	2151-01-09 19:24:00.000000	2151-01-11 19:16:00.000000	2151-01-19 21:34:58.000000	16.9833333333333333	8.1	2151-03-31	0	81	0	1	157	59.5	1	44	4	3	13	2	2151-01-15 09:00:00.000000	22.7	366	0.8	16			139	10.7	22.7	366	0.8	16			139	10.7	1	0	0	0	1700.083330951631
13706415	22827997	33361952	F	77.72710543816002662466	MARRIED	WHITE	Medicare	English	2136-09-28 18:25:00.000000	2136-09-22 13:40:00.000000	2136-09-22 13:40:31.000000	2136-09-26 01:22:17.000000	6.1979166666666667	3.49		0		0	0	163	63.6	1	22	5	1	5	2	2136-09-24 02:00:00.000000	6.3	256	0.8	17	0.04		121	11.4	6.4	247	0.8500000000000001	18	0.04		121.5	11.3	0	0	0	0	519.3999595791101
10912090	28929485	33370256	F	52.6605973269473086	SINGLE	HISPANIC/LATINO - PUERTO RICAN	Medicaid	Spanish	2177-09-16 18:06:00.000000	2177-08-30 05:08:00.000000	2177-08-30 06:07:00.000000	2177-09-06 12:09:59.000000	17.5402777777777778	7.25	2178-05-19	0	262	0	1	163	72.2	1	71	10	2	8	3	2177-08-31 13:09:00.000000	6	214	1.5	20	0.01	35544	137	7.8	6.55	199.5	1.5999999999999999	20.333333333333332	0.015	35544	137	7.699999999999999	1	0	1	1	7276.723974261433
11025155	22223177	33375909	F	72.83685573157279587537	MARRIED	UNKNOWN	Medicare	English	2125-11-19 16:30:00.000000	2125-11-02 15:43:00.000000	2125-11-04 15:37:36.000000	2125-11-07 21:00:07.000000	17.0326388888888889	3.22	2126-08-20	0	291	0	1	152	64.1	1	50	9	2	6	2	2125-11-05 22:20:00.000000	16.4	247	1.5	40			137	8.7	13.142857142857142	205.71428571428572	1.075	31.125			137.11111111111111	8.587499999999999	1	0	1	1	2826.6154384547845
12134533	22360444	33378526	M	39.98612130222336606049	MARRIED	WHITE	Private	English	2179-01-01 18:30:00.000000	2178-12-27 04:09:00.000000	2178-12-27 18:26:39.000000	2178-12-31 17:44:32.000000	5.5979166666666667	3.97		0		0	0		69.5	0	27	3	3	3	0		30.2	316	1.4	25	3.58		140	14.5	19.9	256.5	0.9818181818181819	15.545454545454545	4.040000000000001		141.54545454545453	12.85	1	0	1	1	2973.880145676434
17668417	27916402	33383478	F	67.78741933050172518799	MARRIED	BLACK/AFRICAN AMERICAN	Medicare	English	2126-12-13 16:36:00.000000	2126-10-15 14:22:00.000000	2126-10-25 06:29:48.000000	2126-11-02 11:09:47.000000	59.0930555555555556	8.19		0		0	0		93	1	47	6	3	8	2	2126-10-27 00:00:00.000000		15	0.8	22			146	11		18.5	0.7333333333333334	21			146.66666666666666	10.8	0	0	0	0	4322.5701375976205
16990881	23778782	33387255	M	61.9982613506174597	DIVORCED	PATIENT DECLINED TO ANSWER	Medicaid	English	2143-01-09 17:00:00.000000	2142-12-31 02:11:00.000000	2142-12-31 02:12:47.000000	2143-01-04 20:27:43.000000	9.6173611111111111	4.76		0		0	0	165	75.5	1	46	7	4	5	2	2143-01-02 23:00:00.000000	15.7	356	0.9	23	0.72		132	12.7	14.8	326.5	0.8500000000000001	22	2.603333333333333		134.75	13	1	0	1	1	3076.5006179939955
14365542	23635847	33389727	M	91.05290061870698818257	WIDOWED	WHITE	Medicare	English	2164-01-25 07:07:00.000000	2164-01-20 07:43:00.000000	2164-01-20 09:17:58.000000	2164-01-25 09:24:27.000000	4.975	5	2164-01-25	1	5	1	1	178	70	1	64	12	4	9	3	2164-01-21 20:00:00.000000	19.7	197	1.3	18	7.9		137	12.2	14.75	188.66666666666666	1.25	17	6.155		137	11.225	1	0	1	1	4055.6489517092705
12705048	22073798	33393580	M	80.62044289965435397779	MARRIED	UNKNOWN	Medicare	English	2156-08-22 18:45:00.000000	2156-08-14 14:41:00.000000	2156-08-14 14:41:52.000000	2156-08-17 19:12:44.000000	8.1694444444444444	3.19		0		0	0		104	0	50	7	1	6	0		10.2	270	2.3	83		4040	142	10.7	10.399999999999999	267	2.3	88.5		4040	140.5	10.6	1	0	0	0	2589.69
17277688	29642964	33415357	M	34.5431007995307829	SINGLE	HISPANIC/LATINO - DOMINICAN	Medicaid	English	2187-02-22 18:08:00.000000	2186-07-17 20:20:00.000000	2186-08-03 14:47:27.000000	2186-08-06 21:36:40.000000	219.9083333333333333	3.28	2190-10-29	0	1565	0	0		92.8	1	43	2	2	5	1	2186-08-06 19:50:00.000000	12.6	380	4	50	18.47		131	10.2	15.741176470588236	269.4117647058824	1.7352941176470589	43.588235294117645	9.228571428571428		128.5	8.416666666666666	0	0	0	0	2447.4557344317436
16313045	29744224	33442588	F	85.94695967179142717553	MARRIED	WHITE	Medicare	English	2138-12-22 17:39:00.000000	2138-12-12 20:52:00.000000	2138-12-12 20:52:40.000000	2138-12-20 17:55:06.000000	9.8659722222222222	7.88		0		0	0	150	71.6	1	35	5	2	5	3	2138-12-14 22:45:00.000000	6	164	1	22			140	10	6	164	1	22			140	10	0	0	0	0	1265.0000058114529
11592968	25912922	33445309	M	59.68082714109184230364	SINGLE	BLACK/AFRICAN AMERICAN	Medicare	English	2182-09-22 19:35:00.000000	2182-09-06 16:00:00.000000	2182-09-06 16:01:35.000000	2182-09-13 22:53:31.000000	16.1493055555555556	7.29	2187-08-16	0	1805	0	0	177	77.1	1	56	9	4	4	1	2182-09-10 12:00:00.000000	14.5	113	1.3	55			157	11.3	14.319999999999999	101	1.08	46.2			148	10.459999999999999	1	0	1	1	12354.567445952445
15299156	25226966	33452590	M	75.63403928841091051352	WIDOWED	WHITE	Medicare	English	2122-08-27 14:30:00.000000	2122-08-20 13:52:00.000000	2122-08-20 13:52:54.000000	2122-08-26 17:53:41.000000	7.0263888888888889	6.17		0		0	0	183	107.5	1	28	4	2	5	2	2122-08-22 09:00:00.000000	8.2	351	1.1	21			141	13.9	8.2	351	1	20			142	13.9	0	0	0	0	1500.8808460831642
17225209	27732105	33460456	F	84.65045724630671049758	MARRIED	WHITE	Private	English	2140-08-31 15:30:00.000000	2140-08-25 13:47:00.000000	2140-08-25 13:49:22.000000	2140-08-28 14:25:05.000000	6.0715277777777778	3.02	2141-01-07	0	135	0	1	163	58.6	1	39	7	3	8	1	2140-08-27 21:00:00.000000	12.6	188	0.9	23	4.99		134	11.4	11.35	180.5	0.9	22	4.915		134	10.9	1	0	1	1	2353.824895016849
10380034	28071767	33464058	M	69.67867293769914498089	MARRIED	UNKNOWN	Medicare	English	2119-09-15 16:52:00.000000	2119-09-05 21:07:00.000000	2119-09-05 21:07:36.000000	2119-09-14 15:30:12.000000	9.8229166666666667	8.77		0		0	0	178	102	1	33	8	4	5	2	2119-09-08 08:00:00.000000	19.1	272	1	22	13.88		139	16.6	20.033333333333335	251.66666666666666	0.9333333333333332	20	12.255		138.66666666666666	15.875000000000002	1	0	1	1	2294.516508422792
19526922	28583334	33465433	F	92.1622530024233552	WIDOWED	WHITE	Medicare	English	2196-03-17 16:55:00.000000	2196-02-29 22:10:00.000000	2196-02-29 23:39:00.000000	2196-03-14 22:20:45.000000	16.7812	13.95		0		0	0		63.6	1	35	5	0	6	3	2196-03-06 11:41:00.000000	11.3	177	1.1	28			140	9.9	11.3	177	1.1	28			140	9.9	0	0	1	1	4150.000541254878
12656352	23308903	33473335	M	83.84524248458708351054	MARRIED	WHITE	Medicare	English	2113-11-17 16:50:00.000000	2113-11-05 17:14:00.000000	2113-11-11 05:28:40.000000	2113-11-14 10:45:13.000000	11.9833333333333333	3.22	2113-11-29	0	24	1	1	178	92.5	0	33	5	3	6	0		10.9	244	1.8	38			146	9.3	9.45	234	1.7666666666666666	36.666666666666664			146.66666666666666	9.100000000000001	0	0	0	0	2165.1300512850285
14605415	25961775	33476816	M	77.8868979714515003	SINGLE	WHITE	Medicare	English	2179-12-03 16:52:00.000000	2179-11-20 15:02:00.000000	2179-11-20 16:57:00.000000	2179-11-28 15:20:55.000000	13.0763888888888889	7.93	2181-12-13	0	754	0	0	178	86.3	1	40	9	3	4	2	2179-11-21 21:00:00.000000	22	265	1.2	17			136	10.9	21.35	250	1.3333333333333333	22			134.66666666666666	10.7	1	0	1	1	1924.1627414301038
11583269	28700475	33483885	M	75.7828639033237628	MARRIED	WHITE	Medicare	English	2121-10-28 14:05:00.000000	2121-10-13 21:40:00.000000	2121-10-13 22:27:00.000000	2121-10-25 18:05:01.000000	14.6840277777777778	11.82	2123-01-02	0	446	0	0	173	93.4	1	40	15	2	7	2	2121-10-15 03:45:00.000000	6.9	171	1.8	25			144	7.7	6.800000000000001	165	1.8	24.5			143.2	7.949999999999999	1	0	1	1	2233.4392334371805
10014702	23586319	33494873	F	69.49897472847530617448	MARRIED	WHITE	Medicare	English	2173-07-06 15:22:00.000000	2173-07-02 05:55:00.000000	2173-07-02 08:28:00.000000	2173-07-06 20:04:15.000000	4.39375	4.48	2173-07-06	1	4	1	1	157	82.6	1	24	2	3	7	2	2173-07-03 12:00:00.000000	15.4	310	1.2	33	0.62		138	11.7	17.35	310.5	1.075	32.5	0.6		139	11.5	1	0	0	0
17686646	24871618	33545369	F	66.0422247441422399	WIDOWED	WHITE	Medicare	English	2181-02-07 15:45:00.000000	2181-01-15 21:45:00.000000	2181-01-22 11:46:23.000000	2181-01-25 16:19:49.000000	22.75	3.19	2182-03-04	0	413	0	0		53	0	39	2	3	6	0		16.2	547	0.6	9	0.13		137	12	12.866666666666665	479	0.5333333333333333	7.666666666666667	0.15000000000000002		136.33333333333334	10	0	0	1	1	3716.419137518853
16242617	29325594	33548834	F	62.82484314813496561488		WHITE	Private	Other	2116-11-03 13:54:00.000000	2116-10-28 06:25:00.000000	2116-10-29 08:27:00.000000	2116-11-01 16:11:01.000000	6.3118055555555556	3.32		0		0	0	155	69.2	0	35	8	4	3	0		17.3	122	0.4	10			137	14.6	23.5	143.66666666666666	0.4	9			136.8	10.719999999999999	1	0	1	1	8055.085999619216
10089244	29469323	33563887	F	73.10926925770372033398	MARRIED	UNKNOWN	Medicare	English	2128-02-21 18:35:00.000000	2128-02-09 21:50:00.000000	2128-02-10 02:19:27.000000	2128-02-19 13:55:54.000000	11.8645833333333333	9.48	2128-02-21	1	12	1	1	163	90	1	51	11	3	6	3	2128-02-12 02:00:00.000000	17.6	165	2	105	0.06	32184	139	9.6	15.25	149	2	108.33333333333333	0.06	32184	139	9.1	1	1	0	0	1866.5001677945256
15403581	28486846	33566041	M	79.61530551433478807658	DIVORCED	WHITE	Medicare	English	2172-08-27 16:30:00.000000	2172-08-12 17:39:00.000000	2172-08-18 10:23:31.000000	2172-08-25 18:02:48.000000	14.9520833333333333	7.32	2180-10-14	0	2985	0	0	175	84.1	1	29	7	2	6	2	2172-08-20 05:00:00.000000	10.6	159	0.7	16			137	14.2	9.700000000000001	113.66666666666667	0.6666666666666666	13.666666666666666			136.6	9.544444444444444	1	0	1	1	10043.195487435907
16805260	22946496	33567429	F	85.1791326024936891	WIDOWED	PORTUGUESE	Medicare	English	2130-03-23 19:08:00.000000	2130-03-07 16:03:00.000000	2130-03-07 20:06:17.000000	2130-03-19 15:57:40.000000	16.1284722222222222	11.83		0		0	0	160	82.2	1	43	5	1	6	2	2130-03-09 03:00:00.000000	6.6	256	1	25			146	10.7	6.6	256	1.05	26.5			145.5	10.7	0	0	0	0	1550
12698218	28391223	33568000	M	81.6812568409742338261		WHITE	Medicare	English	2182-09-15 19:30:00.000000	2182-09-06 19:46:00.000000	2182-09-07 03:46:12.000000	2182-09-11 15:23:22.000000	8.9888888888888889	4.48	2182-10-29	0	53	0	1		75.5	1	29	2	3	6	1	2182-09-09 06:00:00.000000	12.3	305	1.2	26			137	11.2	12.45	306.5	1.175	25.75			139	11.149999999999999	0	0	0	0
14693333	22364469	33570553	M	86.38273900896148611362	MARRIED	UNKNOWN	Medicare	English	2176-06-03 16:50:00.000000	2176-05-19 19:01:00.000000	2176-05-26 18:40:46.000000	2176-05-29 22:17:43.000000	14.9090277777777778	3.15	2177-02-19	0	276	0	1	175	83.5	1	30	2	2	6	2	2176-05-28 00:00:00.000000	14.9	192	1.2	18	2.84	12270	140	11.7	14.166666666666666	217.83333333333334	1.1714285714285713	21.428571428571427	2.204	12270	139.28571428571428	10.666666666666666	0	0	0	0	1337.75
14102532	28453738	33576872	M	53.61011869451547801792	DIVORCED	UNKNOWN	Medicaid	Portuguese	2117-09-01 07:51:00.000000	2117-08-11 20:11:00.000000	2117-08-16 23:51:21.000000	2117-09-01 14:30:11.000000	20.4861111111111111	15.61	2117-09-01	1	21	1	1		57.6	1	41	10	3	9	3	2117-08-18 08:21:00.000000	12.9	361	0.8	16	0.01		127	8.4	12.342857142857142	350.7142857142857	0.6799999999999999	15.4	0.01		126.91666666666667	8.085714285714287	1	0	1	1	2847.6528056897223
14610106	20565634	33587019	F	71.13395038236444755958	SINGLE	WHITE	Medicare	English	2191-03-05 14:30:00.000000	2191-02-18 22:11:00.000000	2191-02-23 23:05:54.000000	2191-03-05 14:42:47.000000	14.6798611111111111	9.65	2191-03-13	0	23	1	1		85.5	1	49	3	3	5	2	2191-02-26 02:20:00.000000	25.2	394	0.8	19			136	13.7	24.53333333333333	367.6666666666667	0.7799999999999999	18.4			140	12.6	0	0	0	0	1383.8333349376917
12218519	21628838	33596143	F	55.61589492567789149234	DIVORCED	WHITE	Private	English	2119-08-31 17:00:00.000000	2119-08-13 22:49:00.000000	2119-08-21 20:02:29.000000	2119-08-26 17:54:46.000000	17.7576388888888889	4.91		0		0	0	170	83.5	1	25	1	3	3	1	2119-08-25 15:00:00.000000	26.3	339	0.7	17	0.09	6189	143	14.6	23.35	308	0.7999999999999999	19.25	0.09	6189	141.25	14.05	0	0	0	0	2672.1882585287094
19975121	28313172	33599105	F	88.0474049473438919	WIDOWED	WHITE	Medicare	English	2118-01-25 10:45:00.000000	2118-01-18 00:58:00.000000	2118-01-18 02:56:00.000000	2118-01-25 14:49:01.000000	7.4076388888888889	7.5	2118-01-25	1	7	1	1		67.3	1	37	7	3	6	3	2118-01-19 21:00:00.000000	8.2	307	0.7	23		5178	132	11	8.2	307	0.7	23		5178	136	11	0	0	0	0	539.9999988079071
11814428	20298410	33604891	F	85.99081948102597425512	WIDOWED	NATIVE HAWAIIAN OR OTHER PACIFIC ISLANDER	Medicare	English	2142-01-29 12:43:00.000000	2141-12-28 21:20:00.000000	2142-01-22 08:37:56.000000	2142-01-26 19:31:31.000000	31.6409722222222222	4.45		0		0	0	160	55.3	1	44	6	2	6	1	2142-01-24 05:38:00.000000	20.8	298	1.4	30			129	10.2	19.3	292	1.4	29			128	9.2	1	0	1	1	1525.101274907589
13689440	25960836	33608017	M	54.61637976404076688272	DIVORCED	HISPANIC/LATINO - PUERTO RICAN	Medicare	Spanish	2149-09-14 14:28:00.000000	2149-08-14 03:04:00.000000	2149-08-14 03:44:00.000000	2149-08-20 17:58:08.000000	31.475	6.59	2157-03-28	0	2783	0	0	173	76.8	1	57	4	3	5	1	2149-08-15 17:00:00.000000	17.5	287	1.1	18	0.3		131	10	16.6125	290.625	0.9875	15.125	0.12999999999999998		132.30769230769232	8.835714285714285	0	0	1	1	2506.2595397382975
11647150	25021798	33610519	M	76.23445832565197260386		UNKNOWN	Medicare	English	2159-04-04 19:45:00.000000	2159-03-27 15:13:00.000000	2159-03-27 17:34:00.000000	2159-03-31 16:25:50.000000	8.1888888888888889	3.95	2159-04-04	1	8	1	1	170	62.5	1	53	9	2	9	3	2159-03-29 10:00:00.000000	9.8	92	0.7	19			138	12.2	10.4	122.6	0.7000000000000001	26.8			142.2	11.52	1	0	0	0	1488.0833309898153
16862165	22767825	33617138	F	67.6996012232985254	SINGLE	WHITE	Medicare	English	2197-09-25 18:46:00.000000	2197-09-12 22:39:00.000000	2197-09-14 01:47:33.000000	2197-09-21 23:45:49.000000	12.8381944444444444	7.92	2197-10-26	0	44	0	1		74.3	1	67	4	2	6	3	2197-09-19 00:33:00.000000	10.8	259	1.6	34			145	10.5	10.8	259	1.6	34			145	10.5	0	0	0	0	820
15741496	25906108	33618113	M	59.20917067770592283107	SINGLE	WHITE	Medicaid	English	2138-04-01 14:00:00.000000	2138-03-18 09:33:00.000000	2138-03-18 13:16:00.000000	2138-03-21 21:56:45.000000	14.1854166666666667	3.36		0		0	0	178	134.1	1	36	1	3	4	2	2138-03-21 04:59:00.000000	20.8	346	0.9	14			140	12.9	21.3	330.5	0.8	16.5			136.5	12.7	0	0	0	0	5530
11321046	24480756	33625268	M	82.0118948532753626	MARRIED	WHITE	Medicare	English	2174-02-01 14:55:00.000000	2174-01-05 07:30:00.000000	2174-01-05 12:24:30.000000	2174-01-22 15:18:28.000000	27.3090277777777778	17.12		0		0	0	168	65.7	1	30	10	2	7	2	2174-01-06 20:00:00.000000	13.8	100	0.9	17			138	12.5	12.533333333333333	120.66666666666667	0.95	17			139.57142857142858	9.0625	1	0	1	1	11107.042058564723
18997065	22466727	33626086	F	92.6553296627076477	WIDOWED	WHITE - RUSSIAN	Medicare	Russian	2130-09-10 16:23:00.000000	2130-08-28 01:09:00.000000	2130-08-28 03:17:00.000000	2130-09-01 03:57:07.000000	13.6347222222222222	4.03	2132-03-10	0	560	0	0		85.7	1	66	7	3	9	2	2130-08-30 05:00:00.000000	13.8	220	1.1	19			136	11.7	13.8	220	1.0333333333333334	18.666666666666668			139.33333333333334	11.7	0	0	1	1	3540.3381260186434
16257001	29976391	33631004	M	56.95185178593918552631	MARRIED	ASIAN - CHINESE	Private	English	2156-01-22 15:55:00.000000	2155-12-14 15:45:00.000000	2155-12-14 15:45:40.000000	2156-01-06 11:04:02.000000	39.0069444444444444	22.8		0		0	0	173	80	1	20	4	3	5	1	2155-12-23 22:00:00.000000	15.9	236	0.7	10			138	13.5	15	235	0.7666666666666666	10.666666666666666			136.66666666666666	13.35	1	0	1	1	4948.97
19118397	21985997	33631977	F	86.75569949360819523616	MARRIED	WHITE	Medicare	English	2180-10-11 19:20:00.000000	2180-10-03 00:19:00.000000	2180-10-03 00:20:43.000000	2180-10-09 13:14:22.000000	8.7923611111111111	6.54		0		0	0		62	1	29	4	1	6	2	2180-10-04 08:00:00.000000	8.7	300	0.6	11	0.71		135	7.6	8.5	304	0.55	10.5	0.835		135.5	7.95	0	0	1	1	1669.9999713897705
17338695	20856287	33638187	F	75.25110634410427424374	MARRIED	WHITE	Medicare	English	2142-04-14 16:40:00.000000	2142-04-02 17:09:00.000000	2142-04-03 10:10:42.000000	2142-04-06 16:31:40.000000	11.9798611111111111	3.26	2142-12-15	0	257	0	1	163	78.8	1	80	11	3	4	2	2142-04-05 04:00:00.000000	24.7	256	1.1	51			133	11.8	21	241.5	1.2000000000000002	51			134.5	11.433333333333332	1	0	1	1	2977.3252823557705
17396346	26706517	33642967	F	71.5651951308995132	SINGLE	BLACK/CAPE VERDEAN	Medicaid	Kabuverdianu	2184-08-03 14:20:00.000000	2184-07-25 16:12:00.000000	2184-07-25 17:48:00.000000	2184-07-29 16:25:08.000000	8.9222222222222222	3.94	2191-11-27	0	2681	0	0	160	93	1	29	4	1	9	1	2184-07-27 00:00:00.000000	9	418	1	18			144	10.9	9	418	1	18			144	10.9	0	0	0	0	1769.9166675582528
19235707	26941902	33645153	M	27.0870674633378539282		UNKNOWN	Medicaid	English	2176-02-24 13:14:00.000000	2176-02-01 19:13:00.000000	2176-02-01 19:13:32.000000	2176-02-18 07:25:38.000000	22.7506944444444444	16.51	2176-02-24	1	23	1	1		79	1	66	14	3	3	3	2176-02-02 23:00:00.000000	9.2	265	0.9	16		3401	132	13.4	13.681818181818185	99.26666666666667	1.6500000000000001	24.333333333333332		3401	134.91666666666666	8.2	1	1	1	1	240
19491729	24066862	33665271	F	57.7717069169968891	SINGLE	WHITE	Medicaid	English	2144-10-27 17:00:00.000000	2144-10-08 19:52:00.000000	2144-10-11 00:42:50.000000	2144-10-17 15:28:49.000000	18.8805555555555556	6.62		0		0	0	168	114	1	54	9	1	6	3	2144-10-13 00:00:00.000000	9.2	171	1.5	32	0.78		119	13.1	10.333333333333334	166	1.6	36.75	0.9333333333333332		131.75	13.775	0	0	0	0
15255911	26075209	33665835	F	85.18218894748017904719	MARRIED	OTHER	Medicare	English	2173-03-17 05:37:00.000000	2173-03-08 13:02:00.000000	2173-03-08 13:58:18.000000	2173-03-11 17:29:31.000000	8.6909722222222222	3.15	2173-03-17	1	9	1	1	147	44	1	30	8	2	7	1	2173-03-09 23:19:00.000000	9.4	845	0.5	11			140	9.1	9.4	845	0.5	11			140	9.1	0	0	0	0	4827.666639178991
13451992	29453516	33708273	M	72.01291191106779127872	WIDOWED	BLACK/AFRICAN	Medicare	English	2178-01-18 14:14:00.000000	2178-01-05 17:11:00.000000	2178-01-05 19:48:00.000000	2178-01-11 11:56:29.000000	12.8770833333333333	5.67		0		0	0	168	57.2	1	92	10	4	6	2	2178-01-06 23:00:00.000000	2.5	145	1.1	19			135	11.4	2.5666666666666664	133	0.925	17			139.66666666666666	12	0	0	1	1	1975.0786617696285
12648688	24735638	33729451	M	68.84418914947715030948	SINGLE	WHITE	Medicare	English	2117-11-13 14:06:00.000000	2117-11-05 08:00:00.000000	2117-11-05 12:09:48.000000	2117-11-10 11:23:45.000000	8.2541666666666667	4.97		0		0	0	173	76.5	1	42	9	3	4	1	2117-11-09 19:00:00.000000	15.5	63	1.7	61			135	12.2	11.625	139.4	1.7	57.5			136	9.83	1	0	1	1	8090.594402883202
13859303	28334200	33737697	M	56.31079660121843112846	SINGLE	UNABLE TO OBTAIN	Medicaid	English	2120-06-21 17:17:00.000000	2120-04-23 12:23:00.000000	2120-04-23 12:24:05.000000	2120-05-21 01:54:27.000000	59.2041666666666667	27.56		0		0	0	170	66	1	49	7	3	5	2	2120-04-28 08:00:00.000000	11.2	254	0.7	13			133	10.1	10.799999999999999	262	0.6333333333333333	12.666666666666666			133	9.55	1	0	0	0
10169206	21574219	33739653	F	60.46148246307318922188	MARRIED	WHITE	Medicare	English	2143-06-27 19:55:00.000000	2143-06-18 13:16:00.000000	2143-06-18 15:29:00.000000	2143-06-23 15:48:52.000000	9.2770833333333333	5.01	2144-04-04	0	291	0	1		97.9	0	33	2	3	5	0		19.5	331	0.5	9			130	8	16.325000000000003	315	0.475	11			132	7.4	0	0	0	0	3669.999998807907
14027466	22709239	33743115	M	77.12601424382859705194	MARRIED	WHITE	Private	English	2177-02-26 17:25:00.000000	2177-02-16 00:37:00.000000	2177-02-16 02:05:00.000000	2177-02-21 04:54:36.000000	10.7	5.12		0		0	0	178	70.5	1	39	9	3	12	2	2177-02-18 10:57:00.000000	4.5	147	0.9	19	0.05	570	137	11.7	4.766666666666667	119.33333333333333	0.8500000000000001	18.5	0.13	570	134.25	11.5	1	0	1	1	5840.666687518358
17035780	27473388	33767488	M	78.399044788569405125	WIDOWED	WHITE	Medicare	English	2166-06-06 20:56:00.000000	2166-05-26 17:57:00.000000	2166-05-26 19:43:00.000000	2166-06-04 18:47:11.000000	11.1243055555555556	8.96		0		0	0	178	78	1	48	4	3	7	2	2166-05-29 05:00:00.000000	13.6	365	2.1	38	1.06		139	8.3	12.45	355	2.066666666666667	42.666666666666664	1.02		140.33333333333334	8.100000000000001	0	0	1	1	2226.483313329518
15866889	29054327	33770427	M	58.57374631066525755526	MARRIED	UNABLE TO OBTAIN		Arabic	2121-08-04 17:20:00.000000	2121-07-29 13:21:00.000000	2121-07-29 13:51:09.000000	2121-08-01 17:51:02.000000	6.1659722222222222	3.17		0		0	0		103	0	41	4	3	4	0		6.8	230	1.6	29			140	11	6.8	230	1.7000000000000002	30.666666666666668			140.33333333333334	10.66	0	0	0	0	1203.34
10887781	24705850	33781087	M	91.23723996692603807886	MARRIED	WHITE	Medicare	English	2180-03-30 22:58:00.000000	2180-03-27 15:36:00.000000	2180-03-27 16:10:29.000000	2180-03-30 22:58:31.000000	3.3069444444444444	3.28	2180-03-30	1	3	1	1	183	94.1	1	60	6	3	6	2	2180-03-28 22:00:00.000000	11	204	1.2	32	0.37		134	10.8	11	204	1.2666666666666666	34.333333333333336	0.39		135	10.8	1	0	0	0	1084.5515485182405
14855461	20842265	33804695	M	80.95200389209224447231	WIDOWED	WHITE	Medicare	English	2163-01-19 18:06:00.000000	2162-12-14 17:05:00.000000	2163-01-06 21:14:28.000000	2163-01-16 15:09:29.000000	36.0423611111111111	9.75		0		0	0		101.9	1	30	2	2	11	2	2163-01-08 05:00:00.000000	7	301	0.8	29			137	11.4	8.4	279.5	0.675	23.5			135.5	10.875	0	0	0	0	4005.0000722408295
11547638	20084622	33815139	M	66.5882510013148056	MARRIED	BLACK/AFRICAN AMERICAN	Medicare	English	2135-10-17 12:08:00.000000	2135-08-03 12:23:00.000000	2135-08-11 10:39:12.000000	2135-08-17 09:47:45.000000	74.9895833333333333	5.96		0		0	0	183	103	1	47	4	2	7	1	2135-08-14 20:00:00.000000	6.7	352	1.7	45	1.76		128	7.2	14.190000000000001	329.95454545454544	1.7000000000000002	46.19047619047619	1.76		130.6	7.600000000000001	0	0	1	1	2544.78
16281207	29138610	33816545	M	61.73819777937185026184	MARRIED	WHITE	Private	English	2149-10-09 18:00:00.000000	2149-09-27 14:54:00.000000	2149-09-27 14:55:00.000000	2149-10-02 21:51:21.000000	12.1291666666666667	5.29		0		0	0	183	135.6	1	40	7	2	5	1	2149-09-28 20:25:00.000000	19	449	0.7	16	0.09	8445	135	11	16.75	424.5	0.825	21.25	0.09	8445	138.25	10.6	1	0	1	1	4168.35
11547638	20084622	33818318	M	66.5882510013148056	MARRIED	BLACK/AFRICAN AMERICAN	Medicare	English	2135-10-17 12:08:00.000000	2135-08-03 12:23:00.000000	2135-08-04 15:03:55.000000	2135-08-08 12:15:32.000000	74.9895833333333333	3.88		0		0	0		102	0	47	4	2	7	0		6.7	352	1.7	45	1.76		128	7.2	14.190000000000001	329.95454545454544	1.7000000000000002	46.19047619047619	1.76		130.6	7.600000000000001	0	0	1	1	3661.158132493496
18733090	25131696	33827178	F	61.06467743760757707675	SINGLE	WHITE	Private	English	2172-01-30 17:15:00.000000	2172-01-24 14:57:00.000000	2172-01-24 15:02:00.000000	2172-01-28 13:37:19.000000	6.0958333333333333	3.94		0		0	0	165	70	0	33	2	3	4	0		12.5	255	0.7	18	2.63		139	15	11.45	241	0.6999999999999998	15	2.3733333333333335		138	14.033333333333333	0	0	0	0	2527.1339524760842
19291358	20105861	33842785	M	50.9653123439010604	DIVORCED	WHITE	Medicaid	English	2179-12-28 19:30:00.000000	2179-12-19 07:10:00.000000	2179-12-19 08:56:00.000000	2179-12-22 22:19:24.000000	9.5138888888888889	3.56		0		0	0		92	1	35	2	3	5	1	2179-12-22 20:54:00.000000	18.6	326	1.1	18	0.09		144	15.9	14	246.5	1.1333333333333333	21	0.18666666666666668		145	14.75	1	0	0	0	680.1382181737572
10408070	27111833	33853660	F	85.00209526225838698117		UNKNOWN	Medicare	English	2119-01-08 19:10:00.000000	2119-01-01 18:22:00.000000	2119-01-01 22:43:48.000000	2119-01-05 17:15:37.000000	7.0333333333333333	3.77	2119-07-07	0	187	0	1		73.2	1	28	3	2	8	2	2119-01-04 02:00:00.000000	8.9	170	0.5	9			136	13.3	8.9	170	0.5	9			136	13.3	0	0	0	0
16867431	27602354	33858240	F	66.64548907908242267379	MARRIED	WHITE	Medicare	English	2165-08-30 11:47:00.000000	2165-08-24 18:14:00.000000	2165-08-24 18:24:00.000000	2165-08-28 15:48:59.000000	5.73125	3.89		0		0	0	170	90.3	1	17	1	2	4	2	2165-08-26 22:00:00.000000	11.5	278	0.7	12	0.51		143	13.8	11.35	296.5	0.6999999999999998	10	0.45		140.33333333333334	14.5	0	0	0	0	2116.066672924906
16571612	20084697	33859323	F	59.85496206776755016005	MARRIED	WHITE	Medicaid	English	2116-11-17 16:11:00.000000	2116-11-08 06:26:00.000000	2116-11-08 07:50:00.000000	2116-11-12 23:36:34.000000	9.40625	4.66		0		0	0	165	80.2	0	38	5	3	3	0		27.2	251	1	23	0.03		137	12	27.15	254.5	0.85	17	0.03		138	11.575	1	0	1	1	8571.929399546236
10624668	28071732	33871202	F	85.78851639613066283603		WHITE	Medicare	English	2112-10-23 17:15:00.000000	2112-10-14 23:59:00.000000	2112-10-15 01:09:00.000000	2112-10-19 21:23:58.000000	8.7194444444444444	4.84		0		0	0	168	83.2	1	47	4	3	6	2	2112-10-16 19:00:00.000000	9	119	1.2	46	0.02	13218	138	9	11.766666666666666	114.66666666666667	1.1666666666666667	41.666666666666664	0.02	13218	140	9.299999999999999	0	0	0	0
16666270	22918316	33873249	F	65.08469270602322113375		WHITE	Private	English	2189-02-08 14:25:00.000000	2189-01-31 22:24:00.000000	2189-01-31 22:26:18.000000	2189-02-04 17:23:49.000000	7.6673611111111111	3.79		0		0	0	160	105.6	1	45	6	2	5	2	2189-02-02 20:28:00.000000	11.3	287	0.8	17	0.43		140	12.6	11.3	287	0.8	17	0.43		140	12.6	1	0	1	1	1472.5825457423925
19358609	26310148	33880113	M	77.9191862290390116	MARRIED	WHITE	Medicare	Russian	2197-12-11 18:20:00.000000	2197-12-01 22:27:00.000000	2197-12-02 00:43:00.000000	2197-12-08 18:52:01.000000	9.8284722222222222	6.76	2200-04-23	0	873	0	0	178	48.5	1	55	4	3	5	2	2197-12-06 05:53:00.000000	20.1	576	1.1	20			132	8.1	22.6	594.5	1.1	20.5			133.5	8.149999999999999	0	0	0	0	3363.8333450704813
14187001	21798314	33883256	M	92.4008931064883009	WIDOWED	WHITE	Medicare	English	2172-06-16 16:30:00.000000	2172-05-26 21:00:00.000000	2172-05-26 21:00:37.000000	2172-06-16 17:00:58.000000	20.8125	20.83	2173-01-26	0	245	0	1		70.3	1	67	7	2	9	3	2172-05-28 22:14:00.000000	8.3	216	1	38			141	8.5	8	220.33333333333334	1.0333333333333334	41			142.66666666666666	8.433333333333334	1	0	1	1	3.695878140628338
19760583	22029886	33888264	M	49.29295645079152999929	MARRIED	WHITE	Medicare	English	2170-04-26 15:39:00.000000	2170-04-18 00:00:00.000000	2170-04-18 16:24:30.000000	2170-04-22 09:55:30.000000	8.6520833333333333	3.73		0		0	0	185	113.4	1	25	2	4	2	1	2170-04-19 22:37:00.000000	12.5	232	1	19	0.04	6064	137	14.9	10.7	221.5	1.0333333333333334	17	0.04	6064	137.66666666666666	13.633333333333333	0	0	0	0	2240.637242116034
12065081	24571829	33897581	F	62.45686794265476344755	DIVORCED	WHITE	Medicaid	English	2125-07-01 18:10:00.000000	2125-06-16 20:49:00.000000	2125-06-16 20:53:36.000000	2125-06-28 21:31:43.000000	14.8895833333333333	12.03		0		0	0	163	91.2	1	60	10	3	4	3	2125-06-18 16:57:00.000000	15.5	348	0.8	19	1.43		125	9.8	15.25	347	0.875	19.25	1.49		127.5	9.9	1	0	1	1	1087.4713284261525
19529368	29053433	33908030	M	89.1599495068414306	MARRIED	WHITE	Medicare	English	2180-03-22 16:00:00.000000	2180-02-28 20:10:00.000000	2180-02-28 20:10:44.000000	2180-03-03 13:37:10.000000	22.8263888888888889	3.73	2180-03-26	0	27	1	1	168	57.1	1	78	8	3	6	2	2180-03-01 01:00:00.000000	30.6	186	1.5	42	0.25		136	10.9	24.666666666666668	174.66666666666666	1.4666666666666668	46.333333333333336	0.26666666666666666		137.66666666666666	10.700000000000001	1	0	1	1	1213.3837524875998
10302157	24530152	33918239	F	86.20683584825646800995	WIDOWED	ASIAN	Medicaid	Bengali	2189-05-12 20:54:00.000000	2189-03-17 13:05:00.000000	2189-03-17 14:33:00.000000	2189-04-05 02:52:52.000000	56.3256944444444444	18.51	2189-11-03	0	231	0	1	150	57.1	1	16	4	4	12	2	2189-03-19 04:00:00.000000	18	276	0.9	11			137	10.4	16.875	376.5	0.7666666666666667	19			144.83333333333334	9.2	1	0	1	1	3456.8780895676464
12698076	24360379	33933581	M	57.57496125856281588645	MARRIED	WHITE	Private	English	2165-08-06 16:50:00.000000	2165-07-30 00:00:00.000000	2165-07-30 15:07:05.000000	2165-08-03 20:42:47.000000	7.7013888888888889	4.23		0		0	0	178	98	1	41	5	3	2	1	2165-08-01 00:00:00.000000	14.8	211	1	20			132	16.1	13.8	214.5	0.9	18.75			132	15.233333333333334	0	0	1	1	3380.3740015625954
10448292	28573623	33936638	F	67.7062269673257730491	SINGLE	WHITE	Medicare	English	2162-10-07 00:15:00.000000	2162-09-15 22:39:00.000000	2162-09-28 00:44:00.000000	2162-10-01 10:27:18.000000	21.0666666666666667	3.41	2162-10-07	1	22	1	1		55.2	0	35	2	2	5	0		7	583	0.8	11	0.12	4320	135	7.7	8.1	547	0.75	11	0.1	4320	135	8.2	0	0	0	0
11988070	29561510	33953492	F	83.58613345550499547028	MARRIED	PATIENT DECLINED TO ANSWER	Medicare	English	2174-08-14 13:45:00.000000	2174-08-03 01:56:00.000000	2174-08-03 01:57:21.000000	2174-08-07 18:43:09.000000	11.4923611111111111	4.7		0		0	0		64.2	1	46	3	3	7	1	2174-08-05 09:01:00.000000	13.3	261	0.9	21	0.03	18913	148	9	13.433333333333332	245	0.8000000000000002	16	0.035	18913	144.66666666666666	8.700000000000001	0	0	0	0	1945.21
12475198	28030175	33965484	M	67.5772078664434965	MARRIED	WHITE - RUSSIAN	Medicare	English	2156-08-08 19:27:00.000000	2156-07-30 00:44:00.000000	2156-07-30 00:56:00.000000	2156-08-03 15:37:24.000000	9.7798611111111111	4.61		0		0	0		118	1	32	2	2	7	1	2156-07-31 16:00:00.000000	7	205	1	8	0.03		132	9.8	6.4	199	1.125	11	0.035		130.5	9.45	0	0	0	0	2117.87
15034815	26125198	33966379	M	65.12825780958621650546		UNKNOWN	Private	English	2158-03-01 14:25:00.000000	2158-02-16 20:17:00.000000	2158-02-16 21:23:00.000000	2158-02-20 06:48:41.000000	12.7555555555555556	3.39		0		0	0	173	107	1	22	2	2	5	2	2158-02-17 23:00:00.000000	10	266	1.3	17	0.03	2292	130	14.5	10	266	1.2666666666666666	18	0.03	2292	132	14.5	1	0	0	0
18387406	24128376	33972892	M	65.1835209410625162	SINGLE	BLACK/AFRICAN AMERICAN	Medicare	English	2194-04-13 16:38:00.000000	2194-03-08 18:08:00.000000	2194-04-01 17:14:12.000000	2194-04-05 22:23:43.000000	35.9375	4.21		0		0	0	165	77.4	1	37	3	3	6	1	2194-04-04 10:00:00.000000	8.4	157	1.1	35			135	8	8.799999999999999	157.33333333333334	0.975	37.5			136.25	8.666666666666666	0	0	0	0	2160.333306580782
10390828	27024453	33978454	F	91.597252415293604423	SINGLE	WHITE	Medicare	English	2181-08-15 14:08:00.000000	2181-08-07 03:24:00.000000	2181-08-07 05:33:00.000000	2181-08-11 18:30:39.000000	8.4472222222222222	4.54		0		0	0		57.4	1	61	3	3	6	2	2181-08-08 22:00:00.000000	8.4	254	1	29	0.03		139	8.5	7.6	262.5	1.05	29.5	0.03		138.5	8.4	0	0	1	1	1826.4692935496569
13506251	28279742	33997505	M	77.19110426937634651972	DIVORCED	UNABLE TO OBTAIN	Medicare		2121-03-16 18:34:00.000000	2121-03-11 19:11:00.000000	2121-03-11 19:11:49.000000	2121-03-16 21:03:22.000000	4.9743055555555556	5.08	2121-03-16	1	5	1	1	173	86.6	1	79	16	4	6	3	2121-03-14 04:34:00.000000	7.7	43	2	72	0.2		138	11.6	5.6	42	2.05	73.5	0.2		138.5	11.25	1	0	1	1	2446.9892380982637
13252596	24001734	33999448	M	66.35045257664781158793	MARRIED	WHITE	Medicare	English	2151-05-29 19:00:00.000000	2151-05-09 00:00:00.000000	2151-05-09 20:37:44.000000	2151-05-14 20:37:35.000000	20.7916666666666667	5	2152-01-30	0	266	0	1	173	72.1	1	47	4	2	11	2	2151-05-10 22:50:00.000000	10.9	174	0.9	27	0.02		135	8	10.15	155.25	0.8333333333333334	23.666666666666668	0.015		136	7.525	0	0	0	0	11815.033381544054
19960743	28131106	34001540	F	56.59773345100265333973	SINGLE	WHITE	Private	English	2141-08-21 17:16:00.000000	2141-08-07 07:37:00.000000	2141-08-07 07:38:24.000000	2141-08-15 00:50:48.000000	14.4020833333333333	7.72		0		0	0	168	69.8	1	44	6	3	6	1	2141-08-08 22:15:00.000000	11.9	494	1.1	18	0.21		141	8.9	8.85	419.5	1.06	21.5	0.155		145.2	9.3	1	0	1	1	1573.3232638631016
10680402	27625137	34014186	M	20.82082374304038296679	SINGLE	WHITE	Private	English	2182-11-06 17:10:00.000000	2182-10-27 19:11:00.000000	2182-10-27 19:12:33.000000	2182-10-31 14:44:55.000000	9.9159722222222222	3.81		0		0	0		72	0	54	6	3	1	0		43.6	132	1.1	12	0.62		132	10.9	40.3	133	0.9800000000000001	14	2.866		130.2	10.3	0	0	1	1	5363.007582396269
12822417	29370917	34028253	M	51.35276268884739433033		UNKNOWN	Medicare	English	2134-05-23 16:00:00.000000	2134-05-09 20:15:00.000000	2134-05-09 20:15:56.000000	2134-05-19 13:42:07.000000	13.8229166666666667	9.73		0		0	0	183	84.2	1	36	11	3	4	2	2134-05-10 23:00:00.000000	17.1	151	1.6	31	0.03	2688	136	16.2	15.350000000000001	158	1.55	30	0.035	2688	138.75	15.95	1	0	1	1	4411.1488826256245
17277688	29642964	34044473	M	34.5431007995307829	SINGLE	HISPANIC/LATINO - DOMINICAN	Medicaid	English	2187-02-22 18:08:00.000000	2186-07-17 20:20:00.000000	2186-07-17 20:21:07.000000	2186-07-30 20:09:10.000000	219.9083333333333333	12.99	2190-10-29	0	1565	0	0	178	101	1	58	10	4	5	3	2186-07-19 19:59:00.000000	12.6	380	4	50	18.47		131	10.2	15.741176470588236	269.4117647058824	1.7352941176470589	43.588235294117645	9.228571428571428		128.5	8.416666666666666	1	0	1	1	7153.690151399933
13135946	22133572	34063284	F	75.5737625099705583	DIVORCED	WHITE	Medicaid	English	2143-09-14 17:45:00.000000	2143-07-29 19:18:00.000000	2143-07-29 19:20:15.000000	2143-08-31 18:33:22.000000	46.9354166666666667	32.97		0		0	0	160	52.3	1	47	11	2	7	1	2143-07-30 22:00:00.000000	6.3	353	1.2	23	0.9		137	9.1	6.3	353	1.2	23	0.9		135.66666666666666	7.859999999999999	1	0	1	1	720.7118122652173
12814111	24560448	34071736	M	66.40056204744616811137	MARRIED	WHITE	Medicare	English	2153-06-13 12:20:00.000000	2153-05-27 07:15:00.000000	2153-05-27 16:25:57.000000	2153-06-02 14:41:25.000000	17.2118055555555556	5.93		0		0	0	178	88.6	1	41	13	3	5	3	2153-05-28 20:03:00.000000	10.2	232	1.2	30			141	13.8	9.875	252.25	1	25.5			139.25	11.850000000000001	1	0	1	1	2786.1666967645288
18803681	21723082	34073624	M	56.90589291179242499189	MARRIED	WHITE	Private	English	2161-12-05 17:38:00.000000	2161-11-27 20:53:00.000000	2161-11-29 14:43:34.000000	2161-12-02 18:08:13.000000	7.8645833333333333	3.14		0		0	0	175	115.3	1	24	2	2	3	2	2161-12-02 16:53:00.000000	10.9	258	0.9	19			142	14.4	10.833333333333334	261	0.8500000000000001	18.25			140.5	14.200000000000001	0	0	0	0	1559.9999887943268
17288749	25689972	34096417	M	78.1141008336025612	MARRIED	BLACK/AFRICAN AMERICAN	Medicare	English	2195-02-17 17:49:00.000000	2195-02-11 14:39:00.000000	2195-02-12 04:05:38.000000	2195-02-17 17:49:27.000000	6.1319444444444444	5.57	2197-09-23	0	955	0	0	178	92.1	1	26	4	1	6	2	2195-02-15 14:00:00.000000	7.3	201	1.1	28			140	10.2	7.3	201	1.1333333333333333	29			139.33333333333334	10.2	1	0	0	0	1169.9999916553497
19112585	27838789	34112958	M	56.7512001175476351	MARRIED	ASIAN	Private	English	2185-10-09 17:14:00.000000	2185-10-02 02:18:00.000000	2185-10-02 03:27:00.000000	2185-10-06 14:13:36.000000	7.6222222222222222	4.45		0		0	0	173	86.6	1	95	11	2	3	1	2185-10-04 19:17:00.000000	15.5	224	1.9	42	0.72		138	15	16.166666666666668	208.33333333333334	1.5	36	0.72		137.5	14.866666666666667	1	0	1	1	2562.976088622585
13723460	25379741	34121936	M	90.605170605303394	MARRIED	WHITE - RUSSIAN	Medicare	Russian	2163-08-28 11:00:00.000000	2163-08-09 18:14:00.000000	2163-08-21 16:53:56.000000	2163-08-28 11:20:43.000000	18.6986111111111111	6.77	2163-09-04	0	26	1	1		61.4	1	49	6	3	7	2	2163-08-26 22:00:00.000000	23.6	277	0.7	10			134	11.4	17.36	287.4	0.74	7.2			140.8	10.68	0	0	1	1	1429.6136547774076
18826797	24141686	34122233	M	69.92129175846273003774	DIVORCED	WHITE	Medicare	English	2169-12-10 15:00:00.000000	2169-12-03 11:52:00.000000	2169-12-03 11:52:44.000000	2169-12-07 15:43:20.000000	7.1305555555555556	4.16		0		0	0	168	111.1	1	36	8	3	6	1	2169-12-05 04:00:00.000000	12.9	211	1.5	28	11.21		133	13.5	12.5	188	1.3	25.5	8.623333333333333		133.5	13	1	0	1	1	1542.1522829979658
11636652	20274272	34134184	F	47.49559797187739757324	SINGLE	OTHER	Medicaid	English	2159-07-07 15:00:00.000000	2159-07-01 00:19:00.000000	2159-07-01 00:23:31.000000	2159-07-07 15:33:22.000000	6.6118055555555556	6.63		0		0	0	163	41	1	52	13	2	4	1	2159-07-02 13:18:00.000000	6.1	170	0.8	18	1.05		138	15	5.15	126.5	0.8	19.75	1.05		139	14.65	1	0	1	1	6203.072119182907
12679320	25678130	34135705	F	91.48686898001872730956	MARRIED	WHITE	Medicare	English	2128-07-07 17:17:00.000000	2128-06-26 19:48:00.000000	2128-06-26 21:27:00.000000	2128-07-07 19:17:06.000000	10.8951388888888889	10.91	2128-07-07	1	11	1	1		58.8	1	63	8	2	5	2	2128-07-06 00:00:00.000000	6	225	2.6	103	1.08	39308	135	11.2	6	225	2.5	101.33333333333333	1.08	39308	135.66666666666666	11.2	0	0	1	1	1130.4901374429464
16175010	25868197	34135975	F	47.20812494790364257731	MARRIED	WHITE	Medicare	English	2163-03-22 16:23:00.000000	2163-03-18 00:23:00.000000	2163-03-18 01:00:00.000000	2163-03-21 16:45:02.000000	4.6666666666666667	3.66		0		0	0		68	1	28	5	3	2	3	2163-03-19 13:31:00.000000	19.9	458	1.1	20		4283	136	13.9	18.35	437.5	1.05	19		4283	136.5	13.25	1	0	0	0	840
19381435	29374324	34161199	F	61.03218946464109944761	SINGLE	BLACK/AFRICAN AMERICAN	Medicaid	English	2143-01-19 15:08:00.000000	2143-01-12 18:10:00.000000	2143-01-12 19:00:00.000000	2143-01-15 20:51:20.000000	6.8736111111111111	3.08		0		0	0	170	160.9	1	31	4	3	5	2	2143-01-14 03:53:00.000000	4.5	150	1.2	22			141	11.6	4.5	150	1.25	23			142.5	11.6	1	0	0	0	899.9999965727329
19326654	25280516	34168695	F	71.45640972286867337272	MARRIED	UNKNOWN	Private	English	2154-06-30 16:20:00.000000	2154-06-16 16:48:00.000000	2154-06-16 16:48:47.000000	2154-06-30 18:36:09.000000	13.9805555555555556	14.07	2154-06-30	1	14	1	1	160	76.7	1	75	11	2	6	3	2154-06-18 01:00:00.000000	7.4	283	2	75	0.13		142	12	6.7	261.5	1.8	69.66666666666667	0.14500000000000002		144	11.299999999999999	1	0	1	1	1226.5382699593902
16020425	26973298	34179651	F	71.05057529589209954557	MARRIED	WHITE	Medicare	English	2132-02-07 13:10:00.000000	2132-01-19 11:20:00.000000	2132-01-19 11:21:01.000000	2132-01-23 23:13:59.000000	19.0763888888888889	4.5	2132-08-17	0	211	0	1	163	70	1	49	8	4	8	1	2132-01-23 04:00:00.000000	18	327	1.1	27			136	11	14.700000000000001	310.3333333333333	1.2000000000000002	41.666666666666664			142.16666666666666	10.266666666666666	1	0	1	1	1497.7610237970948
17115630	26018596	34183714	M	67.58317499082799897055	SINGLE	HISPANIC/LATINO - DOMINICAN	Medicare	Spanish	2155-08-22 18:00:00.000000	2155-08-02 00:00:00.000000	2155-08-06 17:12:49.000000	2155-08-11 21:27:29.000000	20.75	5.18		0		0	0	165	72.2	0	30	2	2	5	0		7.8	215	1.3	34			135	14.7	7.8	215	1.2000000000000002	31.5			134.5	14.35	0	0	1	1	1631.9082498773932
15688529	27295157	34212221	F	74.8358129678405003	WIDOWED	SOUTH AMERICAN	Medicare	Spanish	2149-01-18 16:00:00.000000	2148-11-02 00:00:00.000000	2148-11-28 17:21:50.000000	2148-12-15 16:52:48.000000	77.6666666666666667	16.98		0		0	0		52.7	1	34	3	3	6	2	2148-12-04 17:00:00.000000	19.1	217	0.7	13		1409	141	9.8	12.48	255.4	0.6	10.333333333333334		1409	139.5	8.66	0	0	0	0
16485914	22551373	34220938	F	65.08663966478237564257		UNABLE TO OBTAIN	Medicare	English	2164-02-07 13:54:00.000000	2164-02-01 15:28:00.000000	2164-02-01 15:28:29.000000	2164-02-06 09:52:01.000000	5.9347222222222222	4.77	2164-02-07	1	6	1	1	163	36.2	1	46	8	3	10	2	2164-02-03 03:03:00.000000	18	343	0.7	12	0.39	40423	141	14.5	19.133333333333333	328.6666666666667	0.6999999999999998	14.666666666666666	0.39	40423	140.66666666666666	14.266666666666666	1	0	0	0
12014965	25118111	34233088	M	42.54422060502960289951	MARRIED	WHITE	Private	English	2140-08-14 13:00:00.000000	2140-07-17 18:32:00.000000	2140-07-17 19:57:59.000000	2140-08-04 17:04:50.000000	27.7694444444444444	17.88		0		0	0	178	160.3	1	38	17	3	3	3	2140-07-18 21:00:00.000000	24.1	336	0.9	17		1856	138	8.3	19.55	313.5	0.9	20		1856	137.66666666666666	11.350000000000001	1	1	1	1	2026.4570438563824
13166841	25936762	34241679	M	85.4812714735861580967	DIVORCED	WHITE	Other	English	2185-07-05 13:35:00.000000	2185-06-25 18:44:00.000000	2185-06-25 20:57:00.000000	2185-07-02 22:20:19.000000	9.7854166666666667	7.06	2185-09-25	0	92	0	1	188	92.9	1	41	5	2	6	3	2185-06-27 06:00:00.000000	12	254	0.9	21		1235	142	12	12	254	0.9	21		1235	142	12	0	0	0	0
10564547	22969056	34268837	F	92.690698982531521	DIVORCED	WHITE	Medicare	English	2152-09-17 17:41:00.000000	2152-09-09 05:46:00.000000	2152-09-09 06:41:00.000000	2152-09-14 10:46:30.000000	8.4965277777777778	5.17	2152-11-02	0	54	0	1		41.6	1	42	3	4	6	1	2152-09-12 02:00:00.000000	11.1	176	0.9	30	0.57		146	10.4	11.1	176	0.9	30	0.6		146	10.4	0	0	0	0	794.1392721794546
11466140	22572176	34272682	M	69.8723079492500862	DIVORCED	WHITE	Medicare	English	2146-12-24 15:50:00.000000	2146-11-15 02:06:00.000000	2146-11-15 02:07:50.000000	2146-11-30 00:35:09.000000	39.5722222222222222	14.94	2147-02-12	0	89	0	1	185	85	1	77	6	2	7	2	2146-11-16 11:00:00.000000	11.5	257	1.8	21			135	6.1	9.975	258.5	1.5750000000000002	20.75			135	7.375	1	0	0	0
12753907	27484831	34290467	F	88.47471189573549105038		UNKNOWN	Medicare	English	2185-07-05 12:40:00.000000	2185-06-23 09:14:00.000000	2185-06-23 09:15:05.000000	2185-07-05 14:46:51.000000	12.1430555555555556	12.23	2185-07-05	1	12	1	1	152	42	1	50	8	2	7	2	2185-06-28 14:00:00.000000	9	253	1	33	1.48		129	11.5	9.85	287	1.025	32.25	1.665		130.25	11.5	0	0	1	1	4896.822111919522
16947512	28038616	34292825	M	80.8429792971357195	MARRIED	WHITE	Medicare	English	2150-11-10 16:13:00.000000	2150-11-05 01:40:00.000000	2150-11-05 03:19:00.000000	2150-11-08 21:33:04.000000	5.60625	3.76		0		0	0	173	83.3	1	33	6	3	10	2	2150-11-06 06:00:00.000000	14.2	131	1.4	18			143	13.1	14.2	131	1.2666666666666666	19			141.66666666666666	13.1	0	0	0	0	2071.025252223015
11127723	20697918	34298951	M	67.21847767294621708955		UNABLE TO OBTAIN	Medicare	English	2145-04-04 16:30:00.000000	2145-03-21 19:08:00.000000	2145-03-21 19:09:26.000000	2145-03-28 18:26:26.000000	13.8902777777777778	6.97		0		0	0	183	85	1	36	3	3	4	2	2145-03-27 05:00:00.000000	9.9	244	1.5	31	3.51	9830	137	12.3	9.799999999999999	222.66666666666666	1.3599999999999999	29.8	3.1179999999999994	9830	140.2	11.266666666666666	0	0	0	0
11281155	20089585	34300128	M	85.73391408983632769506	MARRIED	WHITE	Medicare	English	2129-10-06 14:36:00.000000	2129-09-26 01:21:00.000000	2129-09-26 02:43:00.000000	2129-10-04 21:47:01.000000	10.5520833333333333	8.79	2129-12-06	0	71	0	1	183	69.8	1	19	5	0	8	1	2129-09-28 05:18:00.000000	5.7	228	1.2	33	0.15		139	10.3	7	224	1.2249999999999999	33.75	0.155		138	9.75	0	0	0	0
14384786	25112098	34300249	F	91.88040942717431182613	MARRIED	UNKNOWN	Medicare	English	2131-11-30 18:00:00.000000	2131-11-18 13:30:00.000000	2131-11-18 13:31:54.000000	2131-11-29 17:22:19.000000	12.1875	11.16	2131-11-30	1	12	1	1	163	55.1	1	30	4	4	7	3	2131-11-20 12:49:00.000000	17.7	204	0.6	24	0.01		146	11.6	14.75	185.5	0.6	22.5	0.01		146	11.149999999999999	1	0	0	0	619.6999772153795
15550489	28594454	34317338	M	70.6498175638800211	SINGLE	WHITE	Medicare	English	2128-09-12 16:33:00.000000	2128-08-26 01:36:00.000000	2128-08-26 04:22:00.000000	2128-08-31 00:02:14.000000	17.6229166666666667	4.82	2128-10-20	0	55	0	1		61	1	55	3	1	5	2	2128-08-27 06:00:00.000000	5.7	199	0.6	14			139	10.4	6.166666666666667	224.66666666666666	0.6	13			138.5	10.666666666666666	0	0	0	0	1091.8471964746714
12195577	29916076	34317717	F	68.54164050440834052795	DIVORCED	WHITE	Medicare	English	2159-08-10 17:15:00.000000	2159-07-17 19:55:00.000000	2159-07-28 12:08:23.000000	2159-08-01 18:20:49.000000	23.8888888888888889	4.26		0		0	0		107	1	22	2	2	5	2	2159-07-29 17:00:00.000000	10.6	216	0.8	24			140	11.1	10.6	216	0.75	24			140.33333333333334	11.1	0	0	0	0
19241223	22886040	34332623	F	83.19354557313294260305	WIDOWED	WHITE	Private	English	2142-03-26 15:45:00.000000	2142-03-12 16:35:00.000000	2142-03-13 08:12:17.000000	2142-03-22 11:04:37.000000	13.9652777777777778	9.12		0		0	0	168	63.3	1	35	7	3	7	3	2142-03-14 14:00:00.000000	9.3	111	0.4	11			136	11.2	11.433333333333335	111.66666666666667	0.5	12.5			134.5	8.671428571428573	1	0	1	1	9482.740027692169
17733544	21643035	34345232	M	71.73950589228815719745	MARRIED	WHITE	Medicare	English	2173-10-19 12:27:00.000000	2173-09-28 02:22:00.000000	2173-09-28 03:27:44.000000	2173-10-03 01:45:31.000000	21.4201388888888889	4.93	2176-05-27	0	972	0	0	185	110.9	1	56	10	4	6	2	2173-09-29 20:00:00.000000	2.9	52	1.9	43			139	10.3	10.450000000000001	65.66666666666667	1.64	35.2			135.8	9.857142857142858	0	0	1	1	11550.963484704494
16707075	27519233	34346210	F	77.1131993004333808513		UNABLE TO OBTAIN	Medicare	English	2132-02-24 16:30:00.000000	2132-02-11 08:17:00.000000	2132-02-11 08:18:22.000000	2132-02-15 11:46:07.000000	13.3423611111111111	4.14		0		0	0	150	60	1	34	8	1	5	3	2132-02-12 15:00:00.000000	13.7	259	0.7	17	0.06		141	13.6	12.700000000000001	217	0.6333333333333333	15.666666666666666	0.15500000000000003		138.33333333333334	10.433333333333332	1	0	0	0
16190514	29738970	34382476	F	80.60269591424620145304	WIDOWED	OTHER	Medicare	English	2167-08-18 14:00:00.000000	2167-08-09 03:07:00.000000	2167-08-09 03:07:51.000000	2167-08-14 15:15:42.000000	9.4534722222222222	5.51		0		0	0		59.8	1	43	3	3	6	2	2167-08-10 14:00:00.000000	15.9	204	1	23	3.96		136	13.5	15.9	204	1.05	25	6.956666666666666		136	13.5	0	0	0	0	1542.8227870464325
19893074	23975922	34433555	F	52.85577203303258904751	SINGLE	WHITE	Medicare	English	2122-12-02 14:07:00.000000	2122-11-09 13:32:00.000000	2122-11-09 15:37:00.000000	2122-12-02 18:59:02.000000	23.0243055555555556	23.14	2122-12-02	1	23	1	1	152	32	1	66	20	4	4	3	2122-11-12 12:30:00.000000	24.4	359	0.7	23			140	8.3	24.4	359	0.7	23			140	8.3	1	1	1	1	2569.29
17051024	27878518	34502571	F	88.29546810364391584514	WIDOWED	WHITE	Medicare	English	2161-05-10 01:57:00.000000	2161-04-18 22:01:00.000000	2161-05-03 18:00:54.000000	2161-05-07 14:02:24.000000	21.1638888888888889	3.83	2161-05-10	1	22	1	1		52.8	1	68	5	4	5	2	2161-05-05 12:00:00.000000	18.4	666	0.5	14	0.21		135	13.5	18.566666666666666	566.3333333333334	0.575	11.5	0.21666666666666667		139.25	11.9	0	0	0	0	1799.5000019073486
18409613	21978131	34511846	F	76.10876540607171257535		WHITE	Medicare	English	2149-03-15 16:02:00.000000	2149-02-09 17:25:00.000000	2149-02-21 04:36:47.000000	2149-03-01 15:50:25.000000	33.9423611111111111	8.47		0		0	0		74.5	1	48	7	3	5	2	2149-02-22 06:00:00.000000	13.4	161	0.7	28			137	9.1	12.288888888888888	159.75	0.6333333333333333	23			140.16666666666666	8.455555555555556	0	0	1	1	4678.924935400486
18611519	27649139	34515361	F	94.1652872159645751	WIDOWED	WHITE	Medicare	English	2154-03-24 12:55:00.000000	2154-03-02 02:18:00.000000	2154-03-02 02:18:36.000000	2154-03-08 05:26:34.000000	22.4423611111111111	6.13	2154-07-22	0	142	0	1		51.1	1	57	4	2	8	2	2154-03-03 20:00:00.000000	11.6	197	1.2	44	0.05	2340	138	12.1	10.483333333333333	229.5	0.9800000000000001	38.2	0.04	2340	140	10.083333333333334	0	0	1	1	969.4800900369883
12918606	29522161	34526707	F	78.22671041848053254189	SINGLE	WHITE	Medicare	English	2189-04-14 13:57:00.000000	2189-03-24 19:18:00.000000	2189-03-26 15:09:31.000000	2189-03-29 23:42:33.000000	20.7770833333333333	3.36	2195-10-20	0	2401	0	0	168	76	0	46	10	3	5	0		28.1	62	0.6	16			137	13.5	14.287500000000001	119.25	0.78	18.4			136.45454545454547	9.347058823529412	1	0	1	1	15722.058021096513
17374965	27356340	34542445	F	66.94693685586846833363	SINGLE	WHITE	Private	English	2151-12-20 18:14:00.000000	2151-12-12 20:40:00.000000	2151-12-12 20:42:37.000000	2151-12-15 21:09:24.000000	7.8986111111111111	3.02		0		0	0		110	1	17	1	2	4	2	2151-12-14 15:00:00.000000	9.8	174	0.6	13			140	14.9	9.8	174	0.6	11			142	14.9	0	0	0	0	948.2508254051208
16676331	23323494	34542894	M	71.96324833945712705549	MARRIED	WHITE	Medicare	English	2165-12-25 19:30:00.000000	2165-12-18 19:39:00.000000	2165-12-18 22:07:40.000000	2165-12-22 17:27:53.000000	6.99375	3.81	2166-07-30	0	224	0	1	178	78.8	1	41	6	2	8	2	2165-12-21 18:12:00.000000	14.7	179	1.3	52	5.5		128	9.3	14.7	179	1.3	51.5	5.390000000000001		128	9.3	0	0	0	0
16568465	26026708	34545918	F	68.4471018149914608	SINGLE	WHITE	Medicare	English	2148-06-27 17:00:00.000000	2148-06-12 13:01:00.000000	2148-06-13 19:14:48.000000	2148-06-19 17:49:53.000000	15.1659722222222222	5.94		0		0	0		124.7	1	38	3	2	6	3	2148-06-17 03:09:00.000000	4.5	81	0.8	14	0.1	2034	137	8.5	7.233333333333333	101.33333333333333	0.8	14.75	0.3	2034	135.5	9.200000000000001	1	0	1	1	2226.061572536826
16799562	26411714	34551164	F	70.9432142098785037	SINGLE	BLACK/AFRICAN AMERICAN	Private	English	2180-01-18 15:00:00.000000	2179-12-11 11:16:00.000000	2179-12-11 11:17:15.000000	2179-12-30 16:50:22.000000	38.1555555555555556	19.23	2180-03-21	0	101	0	1	160	75.8	1	33	3	2	7	2	2179-12-13 13:29:00.000000	6.7	214	0.9	12		1834	141	10.5	6.75	215	0.9	11		1904.5	141	10.8	0	0	1	1	978.4162235334516
12375699	20031565	34568439	F	72.2914135620279766	MARRIED	ASIAN - CHINESE	Medicaid	Chinese	2128-05-23 17:07:00.000000	2128-04-16 16:17:00.000000	2128-04-28 09:31:46.000000	2128-05-01 12:35:40.000000	37.0347222222222222	3.13	2130-03-27	0	710	0	0	163	44	1	77	9	2	5	1	2128-05-01 10:00:00.000000	4.2	246	0.6	14			133	9.6	10.9	176.6	0.6	15.666666666666666			131.66666666666666	9.275	1	0	1	1	6029.750906007364
18892124	20614463	34580785	F	77.90484147800940502766	WIDOWED	WHITE - OTHER EUROPEAN	Medicaid	Other	2125-12-05 18:00:00.000000	2125-11-27 11:40:00.000000	2125-11-28 07:45:12.000000	2125-12-01 16:37:37.000000	8.2638888888888889	3.37		0		0	0		79	1	44	6	2	7	3	2125-11-29 11:16:00.000000	8.1	206	0.8	20			139	10.3	8.1	206	0.8	20			138	10.100000000000001	0	0	0	0	1940.0000002980232
19687015	27747598	34612105	M	38.09053168097377142339	SINGLE	HISPANIC/LATINO - PUERTO RICAN	Medicaid	English	2181-02-15 13:55:00.000000	2181-02-03 01:35:00.000000	2181-02-03 03:05:00.000000	2181-02-09 06:45:46.000000	12.5138888888888889	6.15		0		0	0	175	77.7	1	51	7	3	2	2	2181-02-06 04:20:00.000000	24.7	371	0.9	10	0.18	17976	133	11.6	23.4	335.5	0.9	11.666666666666666	0.18	17976	134.33333333333334	10.75	1	0	1	1	7669.8000076934695
13310935	21966957	34633758	F	78.79366138675788168453	WIDOWED	WHITE	Medicare	English	2183-10-24 13:15:00.000000	2183-10-17 21:05:00.000000	2183-10-17 21:06:20.000000	2183-10-22 01:08:40.000000	6.6736111111111111	4.17	2184-02-19	0	125	0	1	152	49	1	39	6	4	6	2	2183-10-19 19:00:00.000000	10.3	72	0.7	30	0.06		142	7.8	12.45	80	0.6999999999999998	28.666666666666668	0.06		143.33333333333334	10.4	0	0	0	0	9045.666710138321
17759802	21815011	34644276	M	40.48975709559993404677	SINGLE	WHITE	Medicaid	English	2178-07-27 16:36:00.000000	2178-06-28 21:07:00.000000	2178-06-29 01:34:01.000000	2178-07-06 16:27:53.000000	28.8118055555555556	7.62		0		0	0	168	97	1	41	5	4	3	2	2178-06-30 03:00:00.000000	16.9	774	1	14		3223	141	10.2	14.5	760.3333333333334	1.1	19.8		7659	140.16666666666666	9.966666666666667	0	0	0	0	2436.435426801443
12888854	21534167	34653193	M	58.82120020576920385814	MARRIED	WHITE	Private	English	2125-11-06 16:40:00.000000	2125-10-27 22:29:00.000000	2125-10-27 23:30:00.000000	2125-10-31 21:42:02.000000	9.7576388888888889	3.93	2126-06-07	0	223	0	1	173	168	0	47	3	3	3	0		12	241	2.2	81		1356	142	8.2	12	241	2.05	75.5		1356	140	8.2	0	0	0	0	1459.2999968528748
10732108	26833707	34660416	M	69.23981056091273426629	MARRIED	ASIAN - CHINESE	Medicare	Chinese	2147-04-16 19:41:00.000000	2147-03-29 14:08:00.000000	2147-04-05 12:32:59.000000	2147-04-08 18:02:49.000000	18.2312	3.23		0		0	0		55	0	22	1	2	4	0		9.8	494	0.6	8			133	13.5	9.7	475.5	0.7	8			132.5	13.65	0	0	0	0
15907675	24453555	34683365	F	63.7433988971695479	DIVORCED	WHITE	Medicare	English	2178-10-16 14:36:00.000000	2178-09-29 18:18:00.000000	2178-09-29 18:18:33.000000	2178-10-13 19:00:20.000000	16.8458333333333333	14.03	2179-03-17	0	169	0	1	157	49.2	1	47	4	2	4	2	2178-10-05 00:00:00.000000	4.2	143	0.7	19			137	12.5	4.375	131	0.6999999999999998	17.666666666666668			140	12.34	0	0	1	1	1526.5059576146305
14929191	21545324	34686387	F	84.6119869383404245	SINGLE	WHITE - RUSSIAN	Medicare	Russian	2190-08-18 14:30:00.000000	2190-08-12 17:36:00.000000	2190-08-12 18:35:06.000000	2190-08-18 14:43:55.000000	5.8708333333333333	5.84	2191-05-08	0	269	0	1	157	68.1	1	32	8	3	5	3	2190-08-14 15:02:00.000000	3.7	44	1.1	49			148	7.7	3.7	44	1.15	50			147.5	7.7	0	0	0	0	1592.5895432569087
18676539	27615732	34692667	F	52.87556104354555792233	MARRIED	WHITE	Private	English	2155-11-26 12:57:00.000000	2155-11-16 19:00:00.000000	2155-11-16 19:23:07.000000	2155-11-22 00:10:20.000000	9.7479166666666667	5.2	2156-07-05	0	232	0	1	165	69	1	57	7	1	8	2	2155-11-19 03:44:00.000000	8.1	301	0.6	28			136	9.5	8.45	304.5	0.55	27.5			136	9.7	1	0	0	0	778.2104566767812
11956664	26711686	34695132	M	36.82194552591919269355	SINGLE	BLACK/AFRICAN AMERICAN	Private	English	2187-11-20 14:40:00.000000	2187-10-28 05:01:00.000000	2187-11-15 17:05:32.000000	2187-11-20 15:26:50.000000	23.4020833333333333	4.93		0		0	0		70.6	0	11	1	0	4	0		10.2	278	1	14	0.09		137	12.4	8.5	405	1	14	0.08333333333333333		135	13.05	0	0	0	0	1134.270533144474
10766302	29366106	34712146	M	72.598198363459478	DIVORCED	WHITE	Medicaid	English	2119-08-21 17:30:00.000000	2119-08-07 17:30:00.000000	2119-08-07 18:45:50.000000	2119-08-16 18:49:24.000000	14	9		0		0	0		102	1	63	5	2	7	2	2119-08-11 03:04:00.000000	9.2	240	1.4	43			138	13.2	9.45	236.5	1.3666666666666665	40.333333333333336			135.33333333333334	12.6	0	0	0	0
13466375	21011631	34714964	M	70.66034985023628169816		WHITE	Medicare	English	2149-09-29 18:29:00.000000	2149-08-30 04:30:00.000000	2149-08-30 04:32:41.000000	2149-09-15 12:36:18.000000	30.5826388888888889	16.34		0		0	0	183	94	1	39	14	4	6	3	2149-08-31 06:00:00.000000	20.9	298	1.2	26	3.2		138	14.7	19.75	245.75	1.25	35.5	5.8566666666666665		138.25	12.774999999999999	1	0	1	1	1080.7867875546217
18651605	20455620	34717757	M	49.7033695011344077	DIVORCED	WHITE - OTHER EUROPEAN	Private	English	2172-10-02 14:30:00.000000	2172-09-14 08:27:00.000000	2172-09-14 09:32:00.000000	2172-09-20 23:47:55.000000	18.2520833333333333	6.59		0		0	0		66	0	67	5	3	3	0		21.4	425	3.3	30			134	12.5	17.7	366	2.466666666666667	31.833333333333332			142.5	11.233333333333334	0	0	0	0
14553780	27610810	34718699	M	91.87473206501138666662	MARRIED	WHITE	Medicare	English	2177-12-08 14:00:00.000000	2177-11-16 11:44:00.000000	2177-11-27 19:15:51.000000	2177-12-08 14:39:00.000000	22.0944444444444444	10.81	2178-08-03	0	260	0	1	171	84.7	1	41	8	3	7	2	2177-11-29 23:00:00.000000	8.9	263	1.3	28	1.28	20730	136	9.2	11.639999999999999	293.4	1.3749999999999998	27.5	0.752	20730	131	9.139999999999999	0	0	1	1	1410.0000017434359
18075452	29511568	34725060	M	30.81022764815291414094	SINGLE	WHITE	Other	English	2121-11-23 14:00:00.000000	2121-10-23 22:18:00.000000	2121-10-24 00:01:00.000000	2121-10-27 11:20:52.000000	30.6541666666666667	3.47	2123-01-04	0	438	0	0	178	59.2	0	56	10	4	3	0		25.4	95	1.8	64	0.23		135	12	16.349999999999998	99.85714285714286	1.64	55.2	0.23		142.9	8.6	1	0	1	1	10284.948889151216
19112135	28154637	34734991	M	66.0388926307002541	MARRIED	HISPANIC/LATINO - PUERTO RICAN	Medicaid	Spanish	2193-01-19 12:30:00.000000	2193-01-14 10:44:00.000000	2193-01-14 12:55:00.000000	2193-01-17 14:45:39.000000	5.0736111111111111	3.08		0		0	0	160	95.1	1	32	2	2	5	1	2193-01-17 13:00:00.000000	10.6	273	1.1	21			113	8.9	9.25	256	1.1285714285714286	22.142857142857142			115.57142857142857	8.5	0	0	0	0	879.9999976158142
11210771	24383619	34735447	F	88.42868077116602751661	WIDOWED	WHITE	Medicare	English	2161-06-16 17:26:00.000000	2161-06-06 13:44:00.000000	2161-06-06 14:52:00.000000	2161-06-14 22:09:27.000000	10.1541666666666667	8.3		0		0	0	152	74.2	1	67	9	4	8	1	2161-06-09 04:00:00.000000	6.2	103	1.4	27	0.02		139	14.1	16.033333333333335	124.33333333333333	1.5	29	0.02		138.66666666666666	13.325	1	0	1	1	4774.468464136124
16896673	28610692	34739020	M	86.36873763757241013416	MARRIED	WHITE	Medicare	English	2164-05-19 00:54:00.000000	2164-05-14 16:17:00.000000	2164-05-14 18:43:00.000000	2164-05-19 06:09:48.000000	4.3590277777777778	4.48	2164-05-19	1	5	1	1	188	95.4	1	42	7	2	7	2	2164-05-16 00:00:00.000000	9.2	154	1.1	16			142	10.9	9.75	150	1.1666666666666667	18.333333333333332			142.66666666666666	11.15	1	0	1	1	4059.321450922638
19156878	26637672	34743271	M	54.22947304648546564865	SINGLE	OTHER	Private	English	2112-04-29 20:45:00.000000	2112-03-24 19:31:00.000000	2112-04-11 16:37:04.000000	2112-04-14 18:29:01.000000	36.0513888888888889	3.08		0		0	0	183	79.5	1	42	2	3	3	1	2112-04-13 22:00:00.000000	11.7	334	0.5	9			131	7.6	12.779999999999998	363	0.5666666666666667	8.666666666666666			131.66666666666666	7.94	0	0	0	0	2986.433649428189
16387539	29848278	34757834	F	90.1442166350590081	WIDOWED	WHITE	Medicare	English	2175-03-21 13:42:00.000000	2175-02-22 21:59:00.000000	2175-02-22 23:45:00.000000	2175-02-27 22:10:46.000000	26.6548611111111111	4.93	2175-08-06	0	165	0	1		68.5	1	50	5	2	15	3	2175-02-25 02:08:00.000000	7.4	329	1.3	51	0.01		145	10.8	13.587500000000002	454.875	0.9500000000000001	31.666666666666668	0.01		140.83333333333334	8.825	0	0	0	0	3524.999265357852
12135384	21611338	34770264	M	72.54621509696158832896	MARRIED	WHITE	Private	English	2131-07-31 19:30:00.000000	2131-07-19 12:01:00.000000	2131-07-20 04:58:48.000000	2131-07-24 00:51:29.000000	12.3118055555555556	3.83	2132-01-02	0	167	0	1		70.3	1	36	4	3	7	1	2131-07-22 17:19:00.000000	13.7	138	1.2	23			142	10.3	11.85	114	1.1	24.5			142.6	9.8	0	0	0	0	1680
10350119	22478414	34776044	F	74.94669728867740049368	MARRIED	WHITE	Medicare	English	2141-01-09 17:25:00.000000	2140-12-11 18:34:00.000000	2140-12-11 19:50:00.000000	2140-12-26 15:37:48.000000	28.9520833333333333	14.82	2142-10-25	0	683	0	0	157	51	1	31	7	2	8	2	2140-12-13 08:00:00.000000	7.7	184	0.7	16	0.09		136	13.3	9.7	184.5	0.6333333333333333	15	0.06666666666666667		137.66666666666666	13.05	1	0	1	1	7836.86
19433119	22858588	34794695	M	64.2866565941972111	MARRIED	WHITE	Private	English	2166-04-22 11:22:00.000000	2166-04-15 21:49:00.000000	2166-04-15 21:50:44.000000	2166-04-22 09:04:27.000000	6.5645833333333333	6.47	2166-04-22	1	7	1	1		86.8	1	47	9	3	3	3	2166-04-16 23:20:00.000000	13	236	1.8	31		32790	140	10.5	14.9	261.6666666666667	1.7666666666666666	30.333333333333332		32790	138.33333333333334	10.65	0	0	0	0
10637168	20486396	34814685	F	69.2136780393395186	SINGLE	BLACK/AFRICAN AMERICAN	Medicare	English	2199-03-24 17:17:00.000000	2199-03-19 17:43:00.000000	2199-03-19 20:50:00.000000	2199-03-22 21:51:30.000000	4.9819444444444444	3.04	2202-11-17	0	1338	0	0		125.7	1	41	1	2	6	2	2199-03-21 07:00:00.000000	8.1	202	0.7	16			138	10.8	8.1	202	0.6499999999999999	18.5			137.5	10.8	0	0	0	0	1419.8000130206347
14260773	27883515	34831646	F	83.6077573225423144	WIDOWED	WHITE	Medicare	English	2174-08-17 15:24:00.000000	2174-08-10 11:06:00.000000	2174-08-10 12:47:37.000000	2174-08-13 18:22:08.000000	7.1791666666666667	3.23	2181-08-21	0	2568	0	0	157	50.6	0	47	6	3	6	0		26.8	200	1.1	22			138	10.6	30.799999999999997	183.5	1.1	23.5			137.5	10.399999999999999	1	0	1	1	6467.845234378125
11578803	29914435	34842031	F	64.76327057737670427339	MARRIED	WHITE	Private	English	2133-10-14 15:00:00.000000	2133-10-06 18:41:00.000000	2133-10-06 18:41:19.000000	2133-10-11 17:09:58.000000	7.8465277777777778	4.94		0		0	0	165	87	1	35	3	3	3	2	2133-10-08 09:00:00.000000	10.2	437	0.6	9			136	10.2	9.05	412	0.6	8.5			137.33333333333334	9.95	0	0	0	0	3999.9999952316284
17947111	21910214	34850490	M	76.65415342582604288542	MARRIED	WHITE	Medicare	English	2136-09-11 13:30:00.000000	2136-08-26 22:11:00.000000	2136-09-04 12:21:41.000000	2136-09-08 16:14:52.000000	15.6381944444444444	4.16	2146-02-27	0	3472	0	0	175	88	1	35	7	3	7	2	2136-09-05 20:00:00.000000	10.4	243	1.1	22	5.53		138	12.6	11.5	195	1.0333333333333334	24.333333333333332	5.53		136.8	9.114285714285714	1	0	1	1	5745.969274878502
15700698	20792774	34857812	F	72.0814462283454075	MARRIED	WHITE	Medicare	English	2115-02-25 07:20:00.000000	2115-01-30 23:45:00.000000	2115-02-02 10:46:33.000000	2115-02-25 12:03:43.000000	25.3159722222222222	23.05	2115-02-25	1	26	1	1		64.2	1	59	10	2	8	2	2115-02-03 13:00:00.000000	12.3	196	0.5	21			134	8.6	10.925	204.2	0.52	21.2			132.4	8.325	1	0	1	1	2660.826928064227
19241725	21929312	34879904	F	68.72471166757626146196	MARRIED	WHITE	Medicare	English	2183-10-06 02:30:00.000000	2183-09-22 16:41:00.000000	2183-10-01 16:50:57.000000	2183-10-05 16:22:52.000000	13.4090277777777778	3.98	2183-10-06	1	14	1	1		70	0	65	11	4	9	0		36.5	115	1.2	45			141	10.6	31.099999999999998	100.66666666666667	1.1666666666666667	44.666666666666664			136.75	9.18	1	0	1	1	5679.551969412714
18204748	21009763	34880516	F	63.70578015550116239522	DIVORCED	WHITE	Private	English	2110-09-25 13:00:00.000000	2110-09-15 18:44:00.000000	2110-09-15 20:43:00.000000	2110-09-19 22:26:24.000000	9.7611111111111111	4.07		0		0	0	163	77.7	0	33	2	4	6	0		15.1	301	1	16	3.08		135	11.9	15.1	301	1	17.666666666666668	3.0549999999999997		134	11.9	0	0	0	0
17660536	29997844	34886849	M	81.12824450029782384769	MARRIED	WHITE	Medicare	English	2125-03-03 16:21:00.000000	2125-02-16 20:10:00.000000	2125-02-26 14:29:49.000000	2125-03-01 17:09:29.000000	14.8409722222222222	3.11		0		0	0	173	98	1	47	7	3	7	2	2125-02-27 18:00:00.000000	14.8	136	1.6	38	5.79		141	13.4	17.55	184	1.4	31.5	4.585		137.16666666666666	10.5125	1	0	1	1	13837.286052357405
17538194	21049479	34909912	M	60.39306701675418854714	DIVORCED	WHITE	Private	English	2165-06-19 13:20:00.000000	2165-05-24 13:33:00.000000	2165-06-12 09:25:43.000000	2165-06-16 16:48:53.000000	25.9909722222222222	4.31		0		0	0	173	137.2	1	89	13	4	6	3	2165-06-13 15:00:00.000000	20	136	1.2	28			134	14.6	27.125	144.5	1.1	24			136.28571428571428	11.674999999999999	1	0	1	1	10845.361873090267
13224789	28967855	34945139	M	70.657298220540536594	SINGLE	BLACK/AFRICAN AMERICAN	Medicare	English	2115-09-07 14:42:00.000000	2115-08-29 01:45:00.000000	2115-08-29 01:46:21.000000	2115-09-07 17:18:24.000000	9.5395833333333333	9.65	2115-09-07	1	9	1	1	165	82	1	52	14	2	7	2	2115-09-03 16:00:00.000000	9.4	120	3	78	1.67	17527	148	7.9	9.4	120	3	79	1.6749999999999998	17527	146.5	7.9	1	0	1	1	2297.713715394959
13211467	20440845	34946891	M	85.5482857940762563	MARRIED	WHITE	Medicare	English	2199-07-26 13:52:00.000000	2199-07-20 05:24:00.000000	2199-07-21 00:44:00.000000	2199-07-24 22:39:42.000000	6.3527777777777778	3.91		0		0	0		82.1	1	37	9	1	7	2	2199-07-22 04:24:00.000000	7.9	239	1.2	25	0.67		143	8.6	8.350000000000001	248	1.3	27	0.76		144.33333333333334	8.5	1	0	0	0	1631.4526624251157
12864837	28266912	34951053	F	57.0047038827833479051	DIVORCED	PORTUGUESE	Medicare	American Sign Language	2154-01-13 15:15:00.000000	2154-01-02 17:14:00.000000	2154-01-07 09:47:27.000000	2154-01-11 14:09:15.000000	10.9173611111111111	4.18		0		0	0		63	1	32	4	3	2	2	2154-01-09 01:00:00.000000	9.6	143	0.7	10		632	137	12.6	10.620000000000001	147	0.525	12.5		632	137	9.822222222222221	1	0	1	1	7884.114313304424
13336307	27374862	34953158	M	52.75389513436753348921	SINGLE	WHITE		English	2161-10-13 14:00:00.000000	2161-10-03 08:30:00.000000	2161-10-03 16:40:41.000000	2161-10-11 11:10:06.000000	10.2291666666666667	7.77		0		0	0	175	80.3	1	23	6	1	3	2	2161-10-04 19:00:00.000000	10.3	214	0.8	14			135	8	8.15	219.5	0.8500000000000001	13.5			137.5	8.73	1	0	1	1	11590.613368231803
15421505	22211406	34981614	M	84.6701702037431498994	MARRIED	WHITE	Medicare	English	2167-09-17 17:00:00.000000	2167-09-02 18:35:00.000000	2167-09-08 13:10:32.000000	2167-09-13 20:46:20.000000	14.9340277777777778	5.32	2174-05-04	0	2436	0	0	170	70	1	41	9	3	6	2	2167-09-09 16:00:00.000000	6	175	1.2	37			144	11.4	5.85	163	1.15	37.5			141	9.450000000000001	1	0	1	1	879.8324795812368
10542486	29390138	34982826	F	82.85323566293033112293		UNKNOWN	Medicare	English	2172-11-16 14:30:00.000000	2172-11-07 15:18:00.000000	2172-11-07 16:18:00.000000	2172-11-16 15:14:03.000000	8.9666666666666667	8.96	2172-11-23	0	16	1	1	165	58.3	1	38	5	2	8	3	2172-11-11 01:00:00.000000	11	113	0.9	11			140	12.4	11	113	0.9	11			140	12.4	0	0	0	0	1540.472017712891
15808752	22526777	34997263	F	71.44299205884196109855	DIVORCED	WHITE	Medicare	English	2141-06-20 00:00:00.000000	2141-06-11 19:11:00.000000	2141-06-11 19:12:05.000000	2141-06-21 05:56:07.000000	8.2006944444444444	9.45	2141-06-20	1	9	1	1	157	58.3	1	56	16	4	6	3	2141-06-17 20:15:00.000000	21.6	204	0.8	14	0.51		141	10.7	22	184.66666666666666	0.8666666666666667	14.333333333333334	0.5125		141	9.833333333333334	1	1	1	1	4687.122317983769
11587314	22807215	34999504	F	76.5650755754632089	WIDOWED	BLACK/CARIBBEAN ISLAND	Medicaid	Haitian	2197-08-08 15:15:00.000000	2197-07-26 02:00:00.000000	2197-07-26 05:06:00.000000	2197-07-29 16:17:39.000000	13.5520833333333333	3.47		0		0	0	160	64	1	52	5	2	5	2	2197-07-29 00:00:00.000000	5.2	237	1.2	32	0.02		141	9.3	4.575	211	1.1500000000000001	34	0.02		143.5	8.120000000000001	0	0	0	0
14162759	26093683	35003926	F	85.79665217399240321029	WIDOWED	UNKNOWN	Medicare	English	2140-10-26 13:30:00.000000	2140-10-17 23:18:00.000000	2140-10-17 23:18:59.000000	2140-10-21 15:16:00.000000	8.5916666666666667	3.66		0		0	0		59.7	1	42	8	3	5	2	2140-10-19 02:00:00.000000	18.7	119	0.6	19			140	11.5	20.5	123.5	0.6	17.333333333333332			140.66666666666666	11.6	0	0	1	1	4645.265299379826
18257010	24586212	35011237	M	59.43168676901585493697	SINGLE	WHITE	Medicaid	English	2186-07-05 19:18:00.000000	2186-06-07 16:05:00.000000	2186-06-07 17:44:00.000000	2186-06-27 09:10:03.000000	28.1340277777777778	19.64	2186-07-05	1	28	1	1	183	76.1	1	42	11	2	5	3	2186-06-09 08:35:00.000000	7.7	221	0.9	17	0.64		141	12.7	7.75	232.5	0.9	17	0.7475		141	13.5	1	0	1	1	1334.52
16257560	27930026	35029333	M	74.7262717443351105	SINGLE	WHITE	Medicare	English	2141-09-30 17:15:00.000000	2141-09-22 12:10:00.000000	2141-09-22 14:34:25.000000	2141-09-28 20:59:11.000000	8.2118055555555556	6.27	2143-01-25	0	490	0	0	178	80	1	38	8	3	6	2	2141-09-24 08:00:00.000000	8	267	1.5	30			135	7.5	8	267	1.5	30			135	7.5	1	0	1	1	3971.58
13466358	28174301	35031003	M	59.80333153543860417659	MARRIED	OTHER	Private	English	2173-10-29 17:30:00.000000	2173-10-21 09:51:00.000000	2173-10-21 11:20:35.000000	2173-10-25 18:03:04.000000	8.31875	4.28		0		0	0		84	1	31	4	2	2	1	2173-10-23 04:00:00.000000	7.5	207	1.1	11			146	15.9	7.35	201.5	1.05	11.5			143.5	15.75	0	0	0	0	6462.383338339627
17938197	20705933	35042766	M	88.6173526349957319	MARRIED	WHITE - EASTERN EUROPEAN	Medicare	Russian	2202-10-01 16:47:00.000000	2202-08-15 15:52:00.000000	2202-08-15 15:56:00.000000	2202-10-01 18:14:58.000000	47.0381944444444444	47.1	2202-10-01	1	47	0	1	173	79	1	110	16	3	11	3	2202-08-17 12:00:00.000000	28.8	127	1.4	45			139	13.5	22.92	127.6	1.4	42			140.25	11.772727272727273	1	0	1	1	10377.845607560128
15007699	23433523	35043244	M	62.95352875627666040598	SINGLE	NATIVE HAWAIIAN OR OTHER PACIFIC ISLANDER	Private	English	2130-12-21 13:00:00.000000	2130-12-15 06:27:00.000000	2130-12-15 09:06:00.000000	2130-12-18 21:23:00.000000	6.2729166666666667	3.51		0		0	0		60.2	0	38	3	2	5	0		7.2	130	0.6	10	0.43		134	14.1	7.1	137	0.6	10.5	0.43		135	13.75	0	0	0	0	441.9734020829201
12041021	29873530	35055920	F	86.87886935237458999786	WIDOWED	WHITE	Medicare	English	2155-11-25 18:51:00.000000	2155-11-18 00:00:00.000000	2155-11-19 23:24:07.000000	2155-11-23 20:45:31.000000	7.7854166666666667	3.89	2159-02-10	0	1180	0	0		72.6	1	37	3	3	5	2	2155-11-21 16:00:00.000000	17.4	305	1.7	31	0.03	7110	139	9.7	16.333333333333332	288	1.7	31.5	0.043333333333333335	7110	141.5	9.266666666666667	0	0	0	0	957.9166767373681
18774497	25340051	35060892	F	84.82470054861647285301	WIDOWED	ASIAN	Medicaid	Chinese	2147-11-12 12:40:00.000000	2147-10-29 05:10:00.000000	2147-10-29 06:14:00.000000	2147-11-02 21:02:33.000000	14.3125	4.62		0		0	0	135	70	1	45	4	2	7	1	2147-10-30 08:00:00.000000	13.7	169	0.7	62			149	7.5	10.4	170.33333333333334	0.7666666666666666	56.666666666666664			148	7.3999999999999995	1	0	0	0
16259032	29108260	35096871	F	53.33692843831395805156	MARRIED	PORTUGUESE	Medicaid	Portuguese	2132-05-13 18:30:00.000000	2132-05-03 01:27:00.000000	2132-05-03 01:29:09.000000	2132-05-08 15:27:31.000000	10.7104166666666667	5.58		0		0	0	155	45.5	0	19	7	3	9	0		21.2	320	0.8	18			127	9	18.933333333333334	319.6666666666667	0.7666666666666666	18			130.66666666666666	8.6	1	0	1	1	7088.960074838251
19207300	24889622	35102717	F	58.33328929860202276847	MARRIED	WHITE	Private	English	2137-06-21 18:30:00.000000	2137-05-02 17:33:00.000000	2137-05-02 19:57:00.000000	2137-05-12 18:25:29.000000	50.0395833333333333	9.94	2137-07-23	0	82	0	1	150	52.2	1	29	10	2	3	1	2137-05-04 04:00:00.000000	9.1	96	0.5	16	0.18		101	13.2	7.15	123.75	0.6333333333333333	14.333333333333334	0.15		112.81818181818181	10.274999999999999	1	0	1	1	5128.2920007407665
17174562	26416503	35111500	F	85.49537931928237533836	MARRIED	WHITE	Medicare	English	2163-07-10 17:18:00.000000	2163-06-30 22:24:00.000000	2163-06-30 23:44:00.000000	2163-07-06 15:17:12.000000	9.7875	5.65		0		0	0		69.3	1	46	4	2	6	2	2163-07-02 04:00:00.000000	8.8	233	0.7	23		3582	141	8.1	9.850000000000001	245.5	0.7	23		3582	141	8.3	1	0	0	0	1351.5000158399343
15032560	28654982	35139625	F	58.78776727332684752697	SINGLE	WHITE	Medicaid	English	2135-11-11 17:30:00.000000	2135-10-15 17:25:00.000000	2135-10-15 19:41:00.000000	2135-10-22 20:36:58.000000	27.0034722222222222	7.04		0		0	0	163	78.4	1	76	8	3	4	1	2135-10-17 02:34:00.000000	27.2	344	2	66	1.22		139	14.1	22.3	282	1.725	59.75	0.8875		140.25	12.799999999999999	1	0	0	0
18165455	29490255	35157016	M	77.07677177810267652071	MARRIED	WHITE	Private	English	2133-03-24 14:30:00.000000	2133-01-29 00:58:00.000000	2133-02-03 06:25:38.000000	2133-02-16 16:40:35.000000	54.5638888888888889	13.43	2133-05-26	0	117	0	1		83.3	1	36	7	1	10	3	2133-02-05 04:00:00.000000																	0	0	0	0	1357.1666638553143
12362492	27804290	35185026	M	83.07928723360888884021	SINGLE	WHITE	Medicare	English	2158-02-12 12:58:00.000000	2158-01-29 23:01:00.000000	2158-01-30 01:12:00.000000	2158-02-02 21:30:14.000000	13.5813	3.85	2158-02-12	1	14	1	1	183	85.9	1	51	8	3	6	2	2158-02-02 08:00:00.000000	14.2	226	1.7	63	0.99		140	11.3	16.233333333333334	171.66666666666666	1.5999999999999999	52.666666666666664	0.6479999999999999		139.66666666666666	9.683333333333334	1	0	1	1	8231.977630957961
16885626	20181962	35201183	F	83.8313656881373628	MARRIED	HISPANIC/LATINO - PUERTO RICAN	Medicare	Spanish	2190-11-17 18:40:00.000000	2190-10-31 21:24:00.000000	2190-11-01 05:24:23.000000	2190-11-04 18:06:16.000000	16.8861111111111111	3.53		0		0	0	152	88.7	1	27	3	2	10	1	2190-11-04 03:00:00.000000	13.7	274	1.2	25			147	11.5	12.166666666666666	275	1.15	27.75			146.25	11.133333333333333	0	0	0	0
10684044	20790232	35227825	M	78.1874052758931825	WIDOWED	WHITE	Medicare	English	2118-03-19 14:59:00.000000	2118-03-10 16:34:00.000000	2118-03-10 17:51:45.000000	2118-03-13 20:27:30.000000	8.9340277777777778	3.11	2118-04-21	0	42	0	1		81.4	0	31	3	4	7	0		13	220	1	16	0.03	1192	136	14.4	14.4	215.5	1.05	16.5	0.03	1192	135	14.600000000000001	0	0	0	0	825.2999966144562
17444849	25332191	35237173	F	71.1727414061544583	SINGLE	BLACK/AFRICAN	Medicare	English	2183-05-20 12:11:00.000000	2183-03-05 01:27:00.000000	2183-05-08 09:46:53.000000	2183-05-14 15:41:14.000000	76.4472222222222222	6.25	2183-06-02	0	89	0	1		49.5	1	78	8	3	5	3	2183-05-14 12:00:00.000000	7.4	309	0.4	11	0.02		137	10.7	9.375000000000002	384.25	0.42500000000000004	16.666666666666668	0.049999999999999996		136.83333333333334	8.058333333333334	0	0	1	1	3855.449420224875
13764666	20399581	35239249	F	78.15291801965089812599	SINGLE	BLACK/AFRICAN AMERICAN	Medicare	English	2141-03-13 14:30:00.000000	2141-02-25 20:27:00.000000	2141-03-02 09:12:42.000000	2141-03-10 16:21:11.000000	15.7520833333333333	8.3		0		0	0		86.1	1	56	3	2	5	1	2141-03-07 02:00:00.000000	5.9	61	0.7	13			138	8.2	8.683333333333334	143	0.6166666666666666	16.5			137.5	8.450000000000001	0	0	0	0	795.5944960154593
18426782	25623419	35241424	F	61.8286895324804437119	MARRIED	BLACK/AFRICAN AMERICAN	Medicare	English	2118-11-09 17:30:00.000000	2118-10-30 16:08:00.000000	2118-10-30 17:50:00.000000	2118-11-04 00:22:49.000000	10.0569444444444444	4.27		0		0	0		106.3	1	32	11	2	4	3	2118-11-01 02:23:00.000000	8.4	234	1.3	29			141	14.1	8.2	240	1.1666666666666667	29.333333333333332			141.33333333333334	13.899999999999999	1	0	0	0	1449.9999916553497
19903197	26747168	35247961	F	71.2312223432987201	WIDOWED	WHITE	Medicaid	English	2195-04-17 16:13:00.000000	2195-03-26 22:28:00.000000	2195-03-29 22:39:19.000000	2195-04-03 14:04:11.000000	21.7395833333333333	4.64	2195-05-17	0	52	0	1	163	68	1	31	4	3	13	2	2195-03-31 00:00:00.000000	12.8	103	0.7	16		2284	139	9.4	12.75	100	0.8000000000000002	15.333333333333334		2284	138.33333333333334	9.4	0	0	0	0	838.307
16747881	22616350	35249103	M	70.84632243827380202715	MARRIED	WHITE	Medicare	English	2156-11-15 17:52:00.000000	2156-11-05 02:42:00.000000	2156-11-05 03:30:00.000000	2156-11-15 19:03:37.000000	10.6319444444444444	10.65	2156-11-15	1	10	1	1	179	87.2	1	54	14	1	10	3	2156-11-09 14:00:00.000000	8.9	81	2.2	57	1.14		131	14.1	8.9	75.5	2.2	57	1.095		133	14.1	1	0	1	1	1331.4127475321293
16245512	27091444	35255768	F	62.35557475135207159454	DIVORCED	WHITE	Private	English	2155-05-30 14:30:00.000000	2155-05-10 20:54:00.000000	2155-05-11 02:07:56.000000	2155-05-20 17:37:39.000000	19.7333333333333333	9.65		0		0	0	152	48.1	0	45	8	2	5	0		5	153	0.6	11			141	9.7	5	153	0.55	9			142	9.7	1	0	1	1	9703.01
15217424	23695926	35261779	M	79.41045655270265254878	MARRIED	WHITE	Medicare	English	2174-06-19 17:45:00.000000	2174-05-30 21:59:00.000000	2174-05-30 22:00:15.000000	2174-06-04 18:47:39.000000	19.8236111111111111	4.87		0		0	0		88.5	1	27	2	1	7	1	2174-06-02 02:00:00.000000	9.1	326	1.3	21	0.05	1888	142	7.2	8.066666666666666	314.6666666666667	1.1333333333333335	19	0.05	1888	142.33333333333334	7.433333333333334	0	0	0	0	1747.2500082626939
18471753	20617977	35275222	M	63.452691716116377	MARRIED	WHITE	Private	English	2127-06-22 16:45:00.000000	2127-06-15 14:01:00.000000	2127-06-16 11:59:46.000000	2127-06-20 15:48:04.000000	7.1138888888888889	4.16		0		0	0	173	88	1	37	5	3	7	1	2127-06-18 00:52:00.000000	13.5	165	0.7	20			135	11.8	13.699999999999998	150.33333333333334	0.7	19.5			134.6	9.0125	0	0	1	1	6755.933066836558
16625425	29488516	35288211	F	60.21802705846777996202		UNABLE TO OBTAIN	Private	English	2112-03-28 17:30:00.000000	2112-03-20 15:11:00.000000	2112-03-22 09:48:57.000000	2112-03-26 11:58:45.000000	8.0965277777777778	4.09		0		0	0	183	94.6	1	26	4	2	7	2	2112-03-23 15:00:00.000000	7.3	123	0.5	17			133	13.3	9.675	127	0.5666666666666667	16.333333333333332			132.5	11.377777777777776	1	0	1	1	3367.2926819957793
18264883	25422843	35300828	M	43.7047366312381015	MARRIED	WHITE	Medicaid	English	2126-09-21 11:30:00.000000	2126-09-15 08:03:00.000000	2126-09-15 09:09:00.000000	2126-09-21 11:41:47.000000	6.14375	6.11		0		0	0	178	173.5	1	25	3	3	3	2	2126-09-16 14:27:00.000000	11.8	313	1	11			133	10.8	13.7	322	1	13			133.5	10.600000000000001	0	0	0	0	1760.6395606198348
10248673	20465720	35321223	M	69.35233679161882928153	MARRIED	AMERICAN INDIAN/ALASKA NATIVE	Medicare	English	2177-05-15 15:15:00.000000	2177-05-09 16:31:00.000000	2177-05-09 18:20:37.000000	2177-05-13 09:03:41.000000	5.9472222222222222	3.61		0		0	0		70.5	1	27	3	2	5	2	2177-05-11 09:00:00.000000	9.5	198	1.3	19			140	13.3	10	205.5	1.3	19.5			139	13.100000000000001	0	0	0	0	960
10775692	26622397	35325987	M	59.5738882257060616	SINGLE	BLACK/AFRICAN AMERICAN	Medicare	English	2169-08-19 12:45:00.000000	2169-07-29 07:15:00.000000	2169-07-30 10:43:12.000000	2169-08-08 17:42:05.000000	21.2291666666666667	9.29		0		0	0		89.9	1	30	8	3	3	1	2169-08-06 15:00:00.000000	5.2	295	0.9	20			140	12.4	14.075000000000003	184.125	0.8500000000000001	13.666666666666666			136.6153846153846	9.944444444444443	1	0	1	1	7773.532088201493
14097534	22058498	35334895	M	85.61275963759796396788	MARRIED	WHITE - OTHER EUROPEAN	Medicare	English	2148-09-04 16:40:00.000000	2148-08-11 19:20:00.000000	2148-08-19 17:51:49.000000	2148-08-25 18:10:53.000000	23.8888888888888889	6.01		0		0	0		70.8	1	43	6	3	6	3	2148-08-20 20:29:00.000000	11.3	200	1.3	34	0.33		136	8.1	10.371428571428572	241	1.1142857142857143	24.571428571428573	0.32		132.77777777777777	7.849999999999999	0	0	1	1	2096.355294264853
10456718	29448358	35341369	M	70.83181531392580505224	MARRIED	WHITE	Private	English	2127-11-09 15:30:00.000000	2127-10-31 19:32:00.000000	2127-10-31 19:32:17.000000	2127-11-07 14:57:02.000000	8.8319444444444444	6.81	2134-02-27	0	2311	0	0	178	96	1	45	5	2	4	2	2127-11-03 08:00:00.000000	9.2	157	1.5	27			137	14	9.2	147	1.4000000000000001	25.666666666666668			138	14.05	0	0	0	0	1510.0000031590462
10471448	23322808	35356565	F	67.8650534744391694	WIDOWED	WHITE	Medicare	English	2124-12-01 13:20:00.000000	2124-11-12 16:19:00.000000	2124-11-12 17:00:00.000000	2124-11-19 12:24:53.000000	18.8756944444444444	6.81		0		0	0	160	78.2	1	73	11	4	4	1	2124-11-16 20:00:00.000000	43.6	70	2	127			126	16.1	45.574999999999996	60.75	1.9000000000000001	117			132.33333333333334	16.05	1	0	0	0
13850641	20247653	35362593	F	76.76052506131399029806	MARRIED	WHITE	Medicare	English	2112-10-16 13:30:00.000000	2112-10-04 18:37:00.000000	2112-10-04 18:38:15.000000	2112-10-16 14:18:25.000000	11.7868055555555556	11.82	2112-10-22	0	18	1	1	160	50.2	1	71	13	3	8	2	2112-10-06 03:49:00.000000	22.4	95	1.5	67	0.63		143	10.9	17.720000000000002	86.6	1.5	66.5	0.625		143	9.879999999999999	1	0	0	0	2519.1519339047372
10621541	25676470	35369637	M	60.3845057979823423	MARRIED	WHITE - OTHER EUROPEAN	Medicare	English	2149-05-24 06:26:00.000000	2149-05-21 08:12:00.000000	2149-05-21 09:27:00.000000	2149-05-24 11:30:48.000000	2.9263888888888889	3.09	2149-05-24	1	3	1	1		94.6	1	49	2	2	7	1	2149-05-23 01:16:00.000000	8.5	210	1.2	77	0.33		134	7.5	6.8	196.33333333333334	1.3	74	0.33666666666666667		135	6.966666666666666	0	0	0	0
16450029	21337031	35377909	F	61.54436320454809566138	MARRIED	WHITE	Medicare	English	2173-09-18 17:30:00.000000	2173-07-18 19:47:00.000000	2173-08-01 11:13:05.000000	2173-08-18 15:47:14.000000	61.9048611111111111	17.19		0		0	0		72.2	1	67	12	4	5	1	2173-08-03 04:34:00.000000	30.1	35	0.9	24			137	9	9.825000000000001	129	1.2454545454545454	38.18181818181818			139.85714285714286	8.225	1	0	0	0	1624.500035956502
19604549	21063201	35400769	F	77.42512528983827465382	MARRIED	WHITE	Medicare	English	2131-06-21 17:06:00.000000	2131-06-05 06:34:00.000000	2131-06-05 11:41:08.000000	2131-06-08 19:47:59.000000	16.4388888888888889	3.34	2131-12-09	0	187	0	1		136	1	69	3	3	6	2	2131-06-07 11:00:00.000000	23.4	416	1.4	41			135	11.8	23.45	385	1.35	39.5			138	11.366666666666667	0	0	0	0	1416.4166734144092
18409613	21978131	35403429	F	76.10876540607171257535		WHITE	Medicare	English	2149-03-15 16:02:00.000000	2149-02-09 17:25:00.000000	2149-02-09 17:26:16.000000	2149-02-16 17:46:36.000000	33.9423611111111111	7.01		0		0	0	163	86.5	1	32	6	3	5	3	2149-02-12 04:00:00.000000	13.4	161	0.7	28			137	9.1	12.288888888888888	159.75	0.6333333333333333	23			140.16666666666666	8.455555555555556	1	0	0	0	437.52241480723023
19499830	25652349	35406598	F	77.56027160683114817634	MARRIED	BLACK/CAPE VERDEAN	Medicaid	Kabuverdianu	2171-08-06 17:18:00.000000	2171-07-24 15:14:00.000000	2171-08-01 18:17:53.000000	2171-08-04 23:14:49.000000	13.0861111111111111	3.21	2172-12-16	0	511	0	0	163	63.5	1	34	2	2	6	2	2171-08-04 00:00:00.000000	8.5	169	1.1	25	0.03		129	10.3	7.159999999999999	159.6	0.8428571428571431	19	0.035		133.22222222222223	10.742857142857144	0	0	0	0	2187.211732460186
19529801	28878078	35406938	M	87.9110226918043379458	MARRIED	WHITE	Medicare	English	2179-12-19 13:02:00.000000	2179-11-29 17:51:00.000000	2179-11-29 17:52:00.000000	2179-12-03 07:43:04.000000	19.7993055555555556	3.58		0		0	0		105	1	21	3	2	7	2	2179-12-01 04:34:00.000000	5.5	174	0.9	29	0.29	7535	128	11	11.611111111111112	225.77777777777777	1.12	30.1	0.29	7535	129.86666666666667	10.823076923076922	0	0	0	0	1446.787187129259
18533354	24014647	35418198	F	81.93254381113526556822	DIVORCED	WHITE	Medicare	English	2174-12-10 15:40:00.000000	2174-12-07 14:30:00.000000	2174-12-07 15:50:00.000000	2174-12-10 18:17:39.000000	3.0486111111111111	3.1	2176-03-24	0	473	0	0		68.2	1	55	2	2	9	2	2174-12-08 20:00:00.000000	5.9	178	1.1	35			135	13.4	5.9	178	1.1	35			135	13.4	0	0	0	0	3717.9999970197678
11223798	22778427	35445139	M	61.1279137454679972	MARRIED	BLACK/CARIBBEAN ISLAND	Private	Haitian	2157-08-09 18:49:00.000000	2157-02-16 04:53:00.000000	2157-02-16 04:56:33.000000	2157-03-11 07:23:24.000000	174.5805555555555556	23.1	2157-10-08	0	234	0	1		90.8	1	49	8	3	4	3	2157-02-19 20:23:00.000000																	1	1	1	1	10943.23934104573
17594195	24451805	35455471	M	70.88434517388471205393	WIDOWED	WHITE	Medicare	English	2165-11-29 16:12:00.000000	2165-11-20 00:00:00.000000	2165-11-20 22:37:48.000000	2165-11-26 19:27:28.000000	9.675	5.87		0		0	0		125.5	1	30	3	2	6	1	2165-11-22 16:00:00.000000	7.7	166	0.9	22	0.02		138	15.9	7.65	170	0.9333333333333332	23	0.02		138.33333333333334	16	0	0	0	0	699.9999976158142
15589498	24026421	35463137	F	77.10612066033540015174	WIDOWED	WHITE	Medicare	English	2116-02-15 12:58:00.000000	2116-02-08 18:14:00.000000	2116-02-08 21:05:00.000000	2116-02-13 17:16:41.000000	6.7805555555555556	4.84		0		0	0		73.6	1	43	2	2	7	2	2116-02-10 17:56:00.000000	9.8	229	0.8	16			140	13.9	9.05	220.5	0.8500000000000001	16			140.5	13.15	0	0	0	0	1808.9250430688262
14494962	24837867	35474074	F	82.10433531436387077305	WIDOWED	WHITE	Medicare	English	2175-03-05 12:41:00.000000	2175-02-08 02:35:00.000000	2175-02-08 08:57:00.000000	2175-02-21 18:37:37.000000	25.4208333333333333	13.4	2175-04-29	0	80	0	1	173	60.2	1	65	9	3	8	3	2175-02-10 17:00:00.000000	20.7	92	1.2	51			159	11.9	20.7	92	1.15	43.5			155.16666666666666	11.9	1	0	1	1	13791.40259593632
10002428	23473524	35479615	F	81.3596940141361374	WIDOWED	WHITE	Medicare	English	2156-05-22 14:16:00.000000	2156-05-11 14:49:00.000000	2156-05-11 14:49:34.000000	2156-05-22 14:16:46.000000	10.9770833333333333	10.98		0		0	0		48.4	0	42	6	4	6	0		11	349	0.4	12	0.03		135	7.5	11	349	0.4	12	0.04		135	7.5	1	0	1	1	4820.646316673607
18248593	26816494	35489970	F	72.63426744764049893252	MARRIED	WHITE	Medicare	English	2180-08-28 15:00:00.000000	2180-08-19 15:52:00.000000	2180-08-19 16:58:17.000000	2180-08-27 01:52:43.000000	8.9638888888888889	7.37	2180-09-26	0	38	0	1	173	93	1	54	7	4	8	3	2180-08-20 23:00:00.000000	14.3	288	1.1	27	0.14		143	9.7	14.65	236.33333333333334	1.1	28.5	0.125		143.5	9.399999999999999	1	0	1	1	1927.0663132928312
12525991	20167211	35493635	M	65.0578441447344805	MARRIED	BLACK/AFRICAN AMERICAN	Medicare	English	2183-02-20 12:08:00.000000	2183-01-22 14:40:00.000000	2183-01-26 10:05:07.000000	2183-02-06 13:01:32.000000	28.8944444444444444	11.12	2190-11-23	0	2862	0	0		72.8	1	30	9	3	3	2	2183-01-30 01:44:00.000000	9.4	337	1.8	47		20238	134	10.3	10.627272727272727	177.16666666666666	1.3	33.333333333333336		20238	131.92307692307693	9.057894736842103	1	0	1	1	9717.662776693702
16232950	27112895	35510652	M	69.46825689086505202943	SINGLE	WHITE	Medicare	English	2176-07-06 20:10:00.000000	2176-06-20 00:39:00.000000	2176-06-20 00:39:34.000000	2176-06-23 02:07:01.000000	16.8131944444444444	3.06		0		0	0		111.1	0	30	7	4	5	0		35.1	295	1.3	35	0.04		144	11.6	23.549999999999997	324.6666666666667	0.8999999999999999	21.666666666666668	0.04666666666666667		143.16666666666666	11.216666666666667	1	0	1	1	6565.83
17614828	20587978	35515769	M	57.2649708199555971718	SINGLE	WHITE	Medicaid	English	2157-04-14 12:45:00.000000	2157-04-07 18:41:00.000000	2157-04-07 21:52:00.000000	2157-04-12 18:51:49.000000	6.7527777777777778	4.87		0		0	0		96.1	1	42	7	3	5	2	2157-04-10 23:18:00.000000	8.2	219	3.5	67		5288	139	9.7	7.8999999999999995	211.5	3.2	65		5288	139	9.75	1	0	0	0	9179.460379227996
11830275	20810574	35521274	M	77.9211959315863029	MARRIED	WHITE	Medicare	English	2157-12-26 04:45:00.000000	2157-12-02 16:04:00.000000	2157-12-03 23:36:02.000000	2157-12-25 20:26:25.000000	23.5284722222222222	21.87	2157-12-26	1	24	1	1	178	95	1	60	11	3	9	3	2157-12-05 09:00:00.000000	24.2	359	1.2	29	0.13		145	9.3	20.900000000000002	296.75	1.2	27.333333333333332	0.14		147.5	10	1	0	1	1	6051.0757490498945
14450311	20326734	35539845	F	90.8962401792662277	WIDOWED	BLACK/AFRICAN AMERICAN	Medicare	English	2142-12-12 17:45:00.000000	2142-11-24 06:44:00.000000	2142-11-24 08:24:00.000000	2142-11-28 00:17:46.000000	18.4590277777777778	3.66	2145-06-04	0	923	0	0	152	107.2	1	46	10	1	11	2	2142-11-26 01:00:00.000000	6	182	1.1	23	0.02		140	7.1	6.04	204.6	1.15	23	0.02		138	7.260000000000001	1	0	1	1	1623.5158064290881
13800450	27481606	35545856	M	69.3140574529277088	MARRIED	WHITE	Medicare	English	2162-04-30 19:02:00.000000	2162-04-25 04:35:00.000000	2162-04-25 04:36:05.000000	2162-04-29 12:39:15.000000	5.6020833333333333	4.34		0		0	0	178	116.6	1	47	3	2	3	2	2162-04-26 05:04:00.000000			1.3	29			135				1.3	29			134.5		0	0	0	0	1228.0459103286266
18401709	20819390	35556775	F	84.79086643619542355175	WIDOWED	WHITE	Medicare	English	2140-10-27 10:45:00.000000	2140-10-15 20:35:00.000000	2140-10-15 20:41:26.000000	2140-10-21 21:38:11.000000	11.5902777777777778	6.04	2140-10-27	1	12	1	1	155	68	1	54	5	2	10	1	2140-10-18 02:00:00.000000	9	187	1.4	68			140	10.3	8.633333333333333	241.33333333333334	1.3	71.4			139.8	10.533333333333333	0	0	1	1	1894.0427030548453
13625572	22204826	35557857	M	75.35790767947461317884	MARRIED	OTHER	Medicare	English	2129-05-19 19:07:00.000000	2129-05-11 17:21:00.000000	2129-05-12 13:34:22.000000	2129-05-16 13:28:15.000000	8.0736111111111111	4		0		0	0	168	53.3	1	20	4	2	6	1	2129-05-14 18:50:00.000000	12.6	107	0.8	17			138	13.7	14.466666666666667	150	0.8500000000000001	16.5			136.83333333333334	10.455555555555556	1	0	0	0
18360993	29321439	35561103	M	74.1187304885832164	SINGLE	WHITE	Medicare	English	2159-02-21 17:15:00.000000	2159-02-13 19:37:00.000000	2159-02-13 19:39:54.000000	2159-02-18 18:38:07.000000	7.9013888888888889	4.96		0		0	0	168	68	1	34	6	2	7	3	2159-02-15 23:00:00.000000	16.2	581	0.8	25	5.05		148	7.8	16.85	587	0.8	25	4.755		148.5	8.05	0	0	0	0	2619.4890832453966
12117071	21758280	35565595	M	83.8553861397222785	WIDOWED	WHITE	Medicare	English	2135-11-14 15:00:00.000000	2135-11-09 21:46:00.000000	2135-11-10 07:47:02.000000	2135-11-14 16:06:55.000000	4.7180555555555556	4.35	2135-11-16	0	7	1	1	183	94.3	1	27	3	3	7	2	2135-11-11 22:00:00.000000	19.1	259	1.1	13			136	12.9	17.55	247.5	1.0750000000000002	13.5			134.75	12.5	0	0	1	1	1168.0780157148838
16830995	28061625	35575468	M	36.9962896746084331	SINGLE	OTHER	Medicaid	English	2177-01-19 18:00:00.000000	2176-12-30 08:54:00.000000	2176-12-30 14:25:33.000000	2177-01-05 18:12:39.000000	20.3791666666666667	6.16		0		0	0	170	274.8	1	22	4	2	2	2	2177-01-01 00:00:00.000000	8.4	240	0.7	9			140	12.4	8.4	240	0.7	8.5			139.5	12.4	1	0	0	0
15372682	22911810	35582950	F	56.4041128134831761	SINGLE	WHITE	Private	English	2113-06-24 18:17:00.000000	2113-05-27 20:11:00.000000	2113-05-28 10:41:26.000000	2113-06-15 18:11:07.000000	27.9208333333333333	18.31		0		0	0	157	89.6	1	46	10	4	3	3	2113-05-30 02:23:00.000000	17.6	117	1.2	28			145	10	20.2	126.33333333333333	1.15	27			141.14285714285714	9.144444444444446	1	0	0	0
13814568	20950203	35621114	M	46.75577174403089823551	MARRIED	UNKNOWN	Medicare	English	2126-10-26 18:22:00.000000	2126-10-04 00:57:00.000000	2126-10-11 15:40:04.000000	2126-10-20 06:29:28.000000	22.7256944444444444	8.62		0		0	0		142.9	1	22	6	3	3	1	2126-10-12 21:55:00.000000	14.6	229	0.8	13			136	10.9	12.350000000000001	206.25	0.925	13.5			137.6	9.875	1	0	0	0	5422.521244090982
12600095	23647023	35622917	M	79.9092079132921917	WIDOWED	WHITE	Medicare	English	2135-12-07 18:50:00.000000	2135-11-29 07:45:00.000000	2135-11-29 14:14:01.000000	2135-12-02 17:08:57.000000	8.4618055555555556	3.12		0		0	0	193	165.9	1	60	7	2	7	2	2135-12-02 08:00:00.000000	10.9	156	3.4	58	0.33		133	11.7	8.666666666666666	145	3.15	58	0.33		130.27272727272728	11.066666666666668	1	0	0	0	4820.719971995801
11508828	28435746	35626566	M	84.17457033053883908933	MARRIED	WHITE	Medicare	English	2145-03-16 16:57:00.000000	2145-03-05 18:15:00.000000	2145-03-05 18:33:57.000000	2145-03-12 18:02:02.000000	10.9458333333333333	6.98	2152-01-21	0	2513	0	0		83.6	1	53	10	4	8	2	2145-03-10 10:00:00.000000	18.1	198	3.3	67	8.75		141	12.1	15.25	166.5	3.2250000000000005	69.33333333333333	11.673333333333334		140.5	10.799999999999999	1	0	1	1	1235.1381056439131
16619696	26812589	35639998	M	45.13316513434928075084	SINGLE	BLACK/AFRICAN AMERICAN	Medicaid	English	2187-03-04 17:28:00.000000	2187-02-18 15:18:00.000000	2187-02-18 16:13:00.000000	2187-03-04 17:35:47.000000	14.0902777777777778	14.06	2187-03-18	0	28	1	1	191	181.3	1	46	10	3	1	2	2187-02-20 00:00:00.000000	13.2	130	1.3	46			135	15.5	13.2	130	1.125	37.75			139.75	15.5	0	0	0	0	649.9999883770943
18817171	23719554	35653781	M	61.23296008004434198574	MARRIED	WHITE	Private	English	2115-04-04 20:25:00.000000	2115-03-27 02:05:00.000000	2115-03-27 02:07:10.000000	2115-03-31 18:03:26.000000	8.7638888888888889	4.66	2116-03-24	0	363	0	1	168	84.3	1	31	1	3	5	2	2115-03-29 05:00:00.000000	14	302	0.9	24		773	129	11.8	13.6	288.5	0.8	22.5		773	129.5	11.65	0	0	0	0	1358.4999814778566
14295994	29282596	35654645	F	53.9197992168358391301	MARRIED	WHITE	Medicaid	English	2171-12-23 13:23:00.000000	2171-12-02 22:47:00.000000	2171-12-11 10:51:48.000000	2171-12-17 11:10:14.000000	20.6083333333333333	6.01	2172-08-14	0	256	0	1	168	77.2	1	34	5	3	4	2	2171-12-16 05:00:00.000000	20.8	256	0.6	10			139	13.3	22.53333333333333	232.33333333333334	0.6499999999999999	11			140.83333333333334	11.527272727272727	1	0	0	0
14256407	22667713	35695001	M	72.80131232625674666842	SINGLE	WHITE	Medicare	English	2180-10-29 17:15:00.000000	2180-10-19 16:09:00.000000	2180-10-19 16:09:34.000000	2180-10-23 20:10:30.000000	10.0458333333333333	4.17	2187-05-19	0	2403	0	0	178	83	1	49	6	1	4	2	2180-10-21 01:00:00.000000	5.7	121	1.3	46			134	13.3	5.933333333333334	121.33333333333333	1.3800000000000001	42.4			136.6	13.35	0	0	1	1	1608.8525787554681
11984732	28130574	35701049	F	90.4009490054995501	WIDOWED	WHITE	Medicare	English	2120-06-09 13:29:00.000000	2120-05-26 16:27:00.000000	2120-05-26 17:54:00.000000	2120-06-02 18:36:40.000000	13.8763888888888889	7.03	2120-06-21	0	26	1	1	160	73.4	1	64	12	2	5	2	2120-05-30 08:00:00.000000	7.4	211	3.4	101	0.08		142	9.9	8.15	235.5	3.4	103	0.08		142	10.333333333333334	1	0	1	1	2545.3960825689137
11685699	28447908	35726597	M	81.6709916530227447	MARRIED	WHITE - RUSSIAN	Medicare	Russian	2188-10-04 16:45:00.000000	2188-09-02 13:24:00.000000	2188-09-02 13:25:09.000000	2188-09-05 18:28:45.000000	32.1395833333333333	3.21	2194-12-26	0	2306	0	0		98.2	0	39	7	4	8	0		7.2	53	1	23			138	15.2	7.2	53	0.95	20.5			138	15.2	0	0	0	0	8170.7
10504997	24418220	35728937	F	83.82209002676459869225	SINGLE	WHITE	Medicare	English	2184-11-10 13:13:00.000000	2184-10-27 06:17:00.000000	2184-10-27 08:16:00.000000	2184-11-03 10:22:04.000000	14.2888888888888889	7.09	2184-12-26	0	60	0	1	163	69.2	1	48	2	3	6	2	2184-10-28 23:00:00.000000	20	152	0.9	19	0.17		140	8.8	16.3	146.5	0.8333333333333334	17	0.17		139.66666666666666	8.45	0	0	0	0	725.1666641384363
17145502	22660608	35729597	F	68.8541904332530821	DIVORCED	WHITE	Medicare	English	2168-11-18 19:19:00.000000	2168-11-07 22:08:00.000000	2168-11-09 23:15:54.000000	2168-11-18 19:20:00.000000	10.8826388888888889	8.84	2168-11-30	0	23	1	1		76	1	47	8	3	4	3	2168-11-11 04:00:00.000000	13	328	0.7	10			141	8.4	13.25	326.5	0.7	10			141	9.05	0	0	1	1	4382.213882468641
15522643	29250562	35730200	M	70.27304385402920073084	MARRIED	WHITE	Medicare	English	2118-04-20 14:00:00.000000	2118-04-10 17:27:00.000000	2118-04-10 17:28:26.000000	2118-04-16 15:42:15.000000	9.85625	5.93		0		0	0	173	65.9	1	46	7	3	6	2	2118-04-12 01:24:00.000000	9.1	288	1.1	14	0.54		134	12.4	12.933333333333332	226.75	0.9249999999999999	11	0.54		139.57142857142858	9.266666666666667	1	0	1	1	7158.226628893986
18290425	29043540	35751747	F	60.39699705948384906446	SINGLE	WHITE	Private	English	2180-06-10 17:21:00.000000	2180-05-25 00:00:00.000000	2180-05-25 17:40:36.000000	2180-05-30 06:38:20.000000	16.7229166666666667	4.54	2184-07-19	0	1516	0	0		149.5	0	51	6	2	5	0		9.2	144	1.8	51	0.25		137	14.5	8.866666666666665	146.33333333333334	1.6	45.75	0.25		138.25	14.766666666666666	0	0	1	1	2630.050440574065
18861496	25428329	35769452	M	68.96340044561018600149	WIDOWED	WHITE	Medicare	English	2173-12-29 18:38:00.000000	2173-12-18 20:59:00.000000	2173-12-18 22:19:00.000000	2173-12-29 19:17:21.000000	10.9020833333333333	10.87	2173-12-29	1	11	1	1	178	64.8	1	90	13	3	4	3	2173-12-20 05:20:00.000000	71.1	855	1.3	41	0.02		133	13.5	89.6	921.8	1.18	40.6	0.02		136.85714285714286	13.5	1	1	1	1	12004.066412055865
10771068	21520079	35774845	F	77.6885370977780942	MARRIED	WHITE	Medicare	Italian	2184-10-04 13:40:00.000000	2184-09-08 23:12:00.000000	2184-09-14 19:22:05.000000	2184-09-24 17:51:39.000000	25.6027777777777778	9.94	2184-10-04	1	26	1	1		60.5	1	59	6	4	4	2	2184-09-15 21:12:00.000000	16.9	456	0.6	39	0.12	17099	138	9.5	19.05	581.75	0.6	36.5	0.07666666666666666	17099	138.2	8.920000000000002	1	0	1	1	2957.1576594114304
13086918	20541665	35777971	F	56.8432356720567003	SINGLE	WHITE	Medicare	English	2149-11-18 14:59:00.000000	2149-11-04 05:27:00.000000	2149-11-04 10:28:35.000000	2149-11-07 21:54:31.000000	14.3972222222222222	3.48	2150-07-27	0	265	0	1		151.7	0	31	6	3	6	0		7.2	131	1.4	67			130	12.2	7.2	131	1.2	63			134.66666666666666	12.2	0	0	0	0	510
13439409	23565692	35784903	F	59.51069450756849796391	SINGLE	BLACK/AFRICAN AMERICAN	Private	English	2179-07-26 16:30:00.000000	2179-07-06 12:39:00.000000	2179-07-06 13:51:00.000000	2179-07-09 22:35:34.000000	20.1604166666666667	3.36	2180-09-27	0	449	0	0	160	95	0	59	10	1	2	0		6.4	161	2	83	0.06		132	10.2	6.233333333333333	154.66666666666666	1.875	82	0.06		130.5	10.066666666666666	1	0	1	1	1992.9260745253414
12055181	22445133	35787776	M	35.9318670908603063	MARRIED	WHITE - OTHER EUROPEAN	Private	English	2130-12-21 14:07:00.000000	2130-12-07 07:48:00.000000	2130-12-10 18:48:49.000000	2130-12-15 21:05:33.000000	14.2631944444444444	5.09		0		0	0	183	70.3	1	33	4	3	8	2	2130-12-13 10:02:00.000000	6.5	239	1	26		3406	139	11.4	7.949999999999999	235.5	1.04	24.8		3406	140.5	11.7	0	0	1	1	1760.9038519319147
16773780	23749463	35810212	M	48.42328670671317464403	SINGLE	WHITE	Private	English	2180-07-01 12:30:00.000000	2180-06-03 14:27:00.000000	2180-06-05 16:57:36.000000	2180-06-22 08:06:46.000000	27.9187	16.63		0		0	0	178	76	1	28	10	3	3	2	2180-06-07 04:39:00.000000	10.8	173	1.1	21	2.27		134	8.1	27.114285714285717	180.42857142857142	1.0625	21.5	2.27		135.45454545454547	9.28	1	0	1	1	3224.4654750823975
13960491	26285102	35820370	F	71.63705859554913059165	MARRIED	BLACK/AFRICAN AMERICAN	Medicare	English	2117-09-01 13:00:00.000000	2117-08-21 16:20:00.000000	2117-08-21 16:21:06.000000	2117-08-27 21:56:49.000000	10.8611111111111111	6.23		0		0	0	170	90	1	59	11	2	6	2	2117-08-23 11:00:00.000000	8.3	261	1.3	45	0.04		139	12.1	6.733333333333334	241.66666666666666	1.1333333333333335	43.666666666666664	0.03		138.33333333333334	11.033333333333333	1	0	1	1	936.6554822754115
14670441	23579900	35825792	M	76.6088725648565426	MARRIED	ASIAN - CHINESE	Medicare	English	2172-08-16 21:00:00.000000	2172-08-10 14:18:00.000000	2172-08-10 15:27:00.000000	2172-08-17 06:18:37.000000	6.2791666666666667	6.62	2172-08-16	1	6	1	1		60.5	1	58	8	2	6	3	2172-08-11 20:00:00.000000	7.7	107	0.7	36	0.02		139	11.2	7.4	97.5	0.7	34.5	0.02		141	10.8	1	0	1	1	709.7670748848468
18548050	23329658	35830419	M	74.08172473471165844989	WIDOWED	WHITE	Medicare	English	2157-02-09 17:20:00.000000	2157-01-30 20:23:00.000000	2157-01-31 00:25:06.000000	2157-02-06 20:29:31.000000	9.8729166666666667	6.84	2157-03-12	0	41	0	1	170	97.6	1	46	5	2	8	2	2157-02-05 19:00:00.000000	16.8	225	1.3	25	0.05	3235	139	11.4	14.65	196	1.2333333333333334	24.666666666666668	0.4766666666666666	3235	139	10.975000000000001	1	0	0	0	1786.0720322430134
19032368	29341810	35831271	M	85.64052851716578779731	MARRIED	OTHER	Medicare	Kabuverdianu	2139-09-05 00:00:00.000000	2139-08-22 22:45:00.000000	2139-08-23 01:30:00.000000	2139-08-26 16:48:11.000000	13.0520833333333333	3.64	2139-09-05	1	14	1	1	165	71.2	1	56	10	3	10	1	2139-08-24 07:00:00.000000	13.1	32	1.1	25			134	6.6	15.549999999999999	31	1.1	25			134	7.38	1	0	1	1	3222.4883569907397
14048242	23442348	35835281	M	71.8220978602314812	SINGLE	WHITE	Medicare	English	2131-11-30 12:32:00.000000	2131-10-28 17:12:00.000000	2131-10-29 17:55:26.000000	2131-11-02 20:33:23.000000	32.8055555555555556	4.11	2131-12-01	0	34	0	1		74	0	28	4	2	7	0		4.4	99	1.2	36			134	9.7	3.5250000000000004	73.25	1.0833333333333335	34.666666666666664			138	8.75	0	0	0	0	3499.966628074646
14161160	22574493	35839572	F	71.692567302409544	MARRIED	BLACK/AFRICAN AMERICAN	Medicare	English	2169-09-22 11:08:00.000000	2169-09-10 14:48:00.000000	2169-09-10 19:05:18.000000	2169-09-14 18:20:44.000000	11.8472222222222222	3.97	2170-11-23	0	439	0	0	163	102.7	1	51	4	2	6	2	2169-09-12 21:00:00.000000	4.5	142	0.8	16			136	16.2	4.05	148.5	0.9	20.333333333333332			134.33333333333334	16.166666666666668	1	0	0	0
14679785	22663344	35846948	M	63.3970551640343176	DIVORCED	WHITE	Medicare	English	2160-06-08 15:28:00.000000	2160-05-25 17:56:00.000000	2160-06-01 13:15:27.000000	2160-06-08 15:28:36.000000	13.8972222222222222	7.09	2160-06-11	0	17	1	1		68.6	1	39	7	2	8	2	2160-06-02 18:11:00.000000	10.1	83	0.7	11	0.09		132	11.1	10.1	83	0.7666666666666666	12.666666666666666	0.1		133	11.1	0	0	0	0	820
19681287	23111260	35850203	M	69.93671722370982039914	MARRIED	WHITE	Private	English	2139-12-27 18:28:00.000000	2139-12-09 03:05:00.000000	2139-12-09 04:21:00.000000	2139-12-27 20:46:58.000000	18.6409722222222222	18.68	2139-12-27	1	18	1	1	183	83.4	1	56	10	3	5	3	2139-12-10 22:43:00.000000	18.1	241	2	26			140	15.5	18.1	241	1.8800000000000001	26			140.2	15.5	1	0	1	1	4135.523091437295
11321257	21322793	35860455	F	69.91018991061634021644	MARRIED	WHITE	Medicare	English	2148-12-21 14:33:00.000000	2148-11-28 10:33:00.000000	2148-11-28 10:34:29.000000	2148-12-18 17:49:11.000000	23.1666666666666667	20.3		0		0	0	165	109	1	25	12	2	5	3	2148-12-01 01:46:00.000000	19.8	323	1.1	22	0.43		137	11.3	17.5	284	1.1	22.5	3.79		138	11.066666666666668	1	0	1	1
12525991	20167211	35874240	M	65.0578441447344805	MARRIED	BLACK/AFRICAN AMERICAN	Medicare	English	2183-02-20 12:08:00.000000	2183-01-22 14:40:00.000000	2183-01-22 14:41:14.000000	2183-01-26 08:27:30.000000	28.8944444444444444	3.74	2190-11-23	0	2862	0	0	188	65.3	1	33	4	2	3	2	2183-01-24 18:52:00.000000	9.4	337	1.8	47		20238	134	10.3	10.627272727272727	177.16666666666666	1.3	33.333333333333336		20238	131.92307692307693	9.057894736842103	0	0	1	1	2320.000450670719
16784913	22026813	35885226	F	84.40183593647803678414	WIDOWED	WHITE	Medicare	English	2168-06-06 17:33:00.000000	2168-05-26 18:25:00.000000	2168-05-28 18:39:45.000000	2168-06-05 15:15:52.000000	10.9638888888888889	7.86		0		0	0	168	79.5	1	37	10	1	5	3	2168-05-30 22:00:00.000000	9.8	228	1.2	28			143	13.5	9.8	228	1.2	28			143	13.5	1	0	1	1	300
11966397	21933378	35887772	M	70.2882982759071763	MARRIED	WHITE	Medicare	English	2155-04-28 13:00:00.000000	2155-04-16 18:47:00.000000	2155-04-20 05:30:11.000000	2155-04-25 19:27:38.000000	11.7590277777777778	5.58	2155-12-08	0	236	0	1		94	1	21	3	3	8	2	2155-04-21 06:00:00.000000	17.5	255	1	17			138	9.9	16.2	264	1	18			139.5	9.9	0	0	0	0	970
14582979	25279880	35888365	F	69.37679355970379456178	SINGLE	BLACK/AFRICAN AMERICAN	Medicare	English	2157-05-26 14:39:00.000000	2157-05-18 14:54:00.000000	2157-05-18 15:59:00.000000	2157-05-22 17:01:55.000000	7.9895833333333333	4.04		0		0	0	157	78.5	0	51	7	3	3	0		16.5	141	1	17			146	7.2	16.275	126.25	0.95	16.5			146	7.3	1	0	1	1	9410.872072137892
13980145	20824579	35890998	M	49.9106339084771193	DIVORCED	WHITE	Medicare	English	2134-12-08 16:48:00.000000	2134-11-29 20:15:00.000000	2134-11-29 20:15:40.000000	2134-12-06 18:58:40.000000	8.85625	6.95		0		0	0		75	0	28	4	3	3	0		14.6	264	1.1	22		1675	148	10.5	15.350000000000001	269.5	1.0666666666666667	19.333333333333332		1675	149	10.65	1	0	0	0	2967.679324001074
16187793	25022112	35898742	M	76.1037544970184152	DIVORCED	WHITE	Medicare	English	2162-02-20 14:15:00.000000	2162-02-08 03:18:00.000000	2162-02-13 09:53:05.000000	2162-02-16 16:11:47.000000	12.4563	3.26	2162-05-05	0	86	0	1	183	59	0	51	6	3	7	0		12.7	185	0.9	28			139	8.3	13.825	170.75	0.8333333333333334	27.333333333333332			135	8.25	0	0	1	1	4433.583982415497
14893410	20084069	35907568	M	65.0906629485838613	SINGLE	WHITE	Medicare	English	2130-02-18 20:06:00.000000	2130-02-02 14:21:00.000000	2130-02-02 15:58:00.000000	2130-02-14 16:46:40.000000	16.2395833333333333	12.03	2130-07-08	0	156	0	1	183	128.9	1	57	8	2	7	2	2130-02-03 16:36:00.000000	9.3	262	2	59	1.18		136	9.7	9.3	262	1.95	58	1.18		136	9.7	1	0	0	0
12848344	26579731	35910092	M	78.4269774864640734	MARRIED	WHITE	Private	English	2191-07-20 19:55:00.000000	2191-06-05 21:16:00.000000	2191-06-05 21:17:25.000000	2191-06-17 23:42:40.000000	44.9438	12.1	2191-07-26	0	51	0	1	188	101.7	1	48	14	3	8	2	2191-06-07 04:00:00.000000	9.6	123	0.9	19	0.09	3881	131	9.8	11.299999999999999	179.6	2.1333333333333333	62.333333333333336	0.09	3881	137.83333333333334	9.059999999999999	1	0	1	1	1423.6824094802141
18926356	29169320	35910655	M	62.2467219602954267	DIVORCED	WHITE	Other	English	2122-04-04 19:39:00.000000	2122-03-31 14:20:00.000000	2122-03-31 14:48:40.000000	2122-04-03 18:37:21.000000	4.2215277777777778	3.16		0		0	0	180	82.7	1	41	2	2	3	1	2122-04-02 17:30:00.000000	6.4	172	0.8	20		2803	139	12.5	6.4	172	0.8	21.5		2803	139.66666666666666	12.5	0	0	0	0	970.3904012441635
18552005	22699176	35925389	F	83.2005520388612968	WIDOWED	WHITE	Medicare	English	2191-03-21 17:51:00.000000	2191-03-15 17:37:00.000000	2191-03-15 17:37:43.000000	2191-03-18 22:01:45.000000	6.0097222222222222	3.18		0		0	0		53.4	0	85	7	3	6	0		6.8	179	1	49			149	9.8	6.8	179	0.9	45			146.5	9.8	1	0	0	0	1049.999976158142
15431451	24503797	35930046	F	86.62502129486142825244		UNKNOWN	Medicare	English	2155-08-22 01:12:00.000000	2155-08-17 06:49:00.000000	2155-08-17 06:50:08.000000	2155-08-21 00:47:02.000000	4.7659722222222222	3.75	2155-08-22	1	5	1	1	155	55	1	71	10	3	7	1	2155-08-20 19:00:00.000000	11.7	174	1.5	45	2.58		140	9.5	13.6	188.33333333333334	1.58	43	2.6550000000000002		139.6	10.1	1	0	1	1	1770.5357795543969
15509548	23706802	35954667	M	90.6548189662987523	MARRIED	WHITE	Medicare	English	2154-09-13 14:30:00.000000	2154-08-27 15:38:00.000000	2154-09-05 12:41:02.000000	2154-09-13 16:57:04.000000	16.9527777777777778	8.18	2154-09-13	1	17	1	1	163	97	1	60	8	2	8	3	2154-09-06 16:00:00.000000	7.5	99	1.1	21			133	9.8	6.966666666666666	89.33333333333333	0.825	17.75			136.75	9.033333333333333	1	0	1	1	8426.43
11534955	23090811	35956395	M	74.32809487347505976251	MARRIED	WHITE	Medicare	English	2154-06-04 15:00:00.000000	2154-04-30 20:01:00.000000	2154-05-01 00:25:38.000000	2154-05-29 02:21:04.000000	34.7909722222222222	28.08	2155-03-31	0	335	0	1		70	1	39	6	2	7	3	2154-05-02 00:31:00.000000	11.4	347	0.8	17			134	12.8	11.55	357	0.8	16.5			135.5	12.75	0	0	0	0
19505092	23365445	35957275	M	55.37686581012649756113	MARRIED	WHITE	Private	English	2171-05-25 16:15:00.000000	2171-05-18 15:32:00.000000	2171-05-18 15:34:19.000000	2171-05-23 00:55:13.000000	7.0298611111111111	4.39		0		0	0	191	78.3	1	32	4	2	4	2	2171-05-19 22:00:00.000000	7.3	134	0.8	10	0.02	751	138	15.2	6.949999999999999	140.5	0.8	10	0.02	751	139	15.399999999999999	0	0	0	0	509.9999988079071
12167722	25273366	35965699	M	69.64003987614908593328	WIDOWED	UNKNOWN	Medicare		2153-10-05 01:58:00.000000	2153-08-22 18:28:00.000000	2153-08-23 18:25:46.000000	2153-08-30 14:35:09.000000	43.3125	6.84	2153-10-05	1	44	0	1		79.8	1	37	6	3	6	3	2153-08-24 20:13:00.000000	26.3	110	0.8	23	0.03		135	7.4	12.100000000000003	53	0.7571428571428572	25.714285714285715	3.115		136.11111111111111	8.350000000000001	0	0	1	1	3694.0726442188025
13455882	27667057	35980177	M	85.36533996637845592785	SINGLE	WHITE	Medicare	English	2168-05-20 18:29:00.000000	2168-05-13 10:30:00.000000	2168-05-14 12:45:14.000000	2168-05-17 18:12:34.000000	7.3326388888888889	3.23		0		0	0	173	55	1	28	4	1	6	2	2168-05-17 16:27:00.000000	4.9	146	0.9	19			142	13.5	5.050000000000001	139.5	0.95	18			139.25	12.475000000000001	1	0	1	1	2842.7785347141325
15131736	25699489	35980733	F	65.6432846046061394	SINGLE	BLACK/AFRICAN AMERICAN	Medicaid	English	2130-08-30 15:40:00.000000	2130-08-23 16:20:00.000000	2130-08-23 17:12:11.000000	2130-08-28 00:06:57.000000	6.9722222222222222	4.29	2134-11-24	0	1554	0	0	168	117	1	37	5	4	5	1	2130-08-26 08:00:00.000000	14.9	237	1.2	31			141	13.7	12.75	262.25	0.9750000000000001	28.5			142.25	13.1	1	0	0	0	1239.1867008954287
15347754	25595619	35984955	M	55.71961230879496029725		UNKNOWN	Medicare	English	2138-09-27 05:40:00.000000	2138-09-20 19:59:00.000000	2138-09-20 20:35:00.000000	2138-09-25 21:55:24.000000	6.4034722222222222	5.06	2138-09-27	1	7	1	1		68.9	1	51	10	3	7	2	2138-09-22 05:50:00.000000	10.2	143	1.2	20	0.07	10318	134	14	11.833333333333334	128.66666666666666	1.2	19	0.07	11775	134.66666666666666	14	1	0	1	1	4825.598628669977
18264198	23403449	35995878	M	47.2951602407901245	SINGLE	BLACK/AFRICAN AMERICAN	Medicare	English	2148-04-22 16:30:00.000000	2148-04-17 18:33:00.000000	2148-04-17 19:07:00.000000	2148-04-22 17:07:17.000000	4.9145833333333333	4.92		0		0	0		136.3	1	31	2	2	2	2	2148-04-19 05:00:00.000000	11.3	187	1.1	28			139	14.6	11.3	187	1	26			141	14.6	1	0	0	0	780
14568429	22706161	36002686	M	71.0691629720082089	MARRIED	WHITE	Medicare	Russian	2155-03-06 16:49:00.000000	2155-01-26 04:44:00.000000	2155-01-26 06:14:00.000000	2155-02-17 18:54:31.000000	39.5034722222222222	22.53	2155-04-15	0	79	0	1	170	87	1	78	20	3	4	3	2155-01-28 18:00:00.000000	10	119	2.4	74	0.04		134	19	9.633333333333333	110.5	2	65	0.04		130	18.96666666666667	1	1	1	1	817.6000075489283
17372569	21157219	36003394	F	71.47659991336033521762	WIDOWED	WHITE	Medicare	English	2188-07-06 14:30:00.000000	2188-06-23 01:47:00.000000	2188-06-24 13:50:34.000000	2188-07-03 16:03:42.000000	13.5298611111111111	9.09	2188-07-13	0	20	1	1	163	71	1	54	7	4	7	2	2188-06-27 06:17:00.000000	11.8	227	0.8	24	0.75		131	11.2	17.071428571428573	292.57142857142856	0.6384615384615385	28	1.4587499999999998		133.69230769230768	9.777777777777777	1	0	1	1	4031.842982456088
10963917	24068553	36013444	M	71.8294056482490452	SINGLE	WHITE	Medicare	English	2148-11-16 17:27:00.000000	2148-10-30 15:04:00.000000	2148-10-30 16:23:00.000000	2148-11-02 19:00:32.000000	17.0993055555555556	3.11		0		0	0	168	106.3	1	57	5	3	5	1	2148-10-31 22:00:00.000000	11.6	181	2.1	66	0.98		131	13.5	16.4	159.4	1.875	49.75	0.98		134.1	9.510000000000002	0	0	0	0	1877.5611053220928
16316667	25740448	36015202	M	77.1567895015116309	SINGLE	WHITE	Other	English	2130-03-08 16:40:00.000000	2130-02-26 16:28:00.000000	2130-02-26 17:33:00.000000	2130-03-01 21:39:26.000000	10.0083333333333333	3.17	2131-02-16	0	355	0	1	168	68.2	1	20	9	4	5	1	2130-02-28 15:05:00.000000	13.1	217	0.6	10			134	12.2	11.899999999999999	183.75	0.5666666666666668	9.333333333333334			133.57142857142858	10.7	1	0	1	1	4879.416591688991
19288268	26588269	36022551	M	64.6448702351987024	MARRIED	BLACK/AFRICAN	Private	English	2123-09-01 15:11:00.000000	2123-08-24 18:37:00.000000	2123-08-24 19:47:00.000000	2123-08-28 13:07:48.000000	7.8569444444444444	3.72		0		0	0		100.2	1	37	9	3	3	1	2123-08-27 23:57:00.000000	11.7	205	1.1	13	0.01		137	10.1	11.7	205	1.2333333333333334	16.666666666666668	0.01		139	10.1	1	0	0	0
14717666	27577294	36026122	M	94.2878524527725605	SINGLE	WHITE	Medicare	English	2113-05-01 14:37:00.000000	2113-04-15 20:41:00.000000	2113-04-15 23:21:00.000000	2113-04-24 16:40:48.000000	15.7472222222222222	8.72	2113-11-10	0	209	0	1	170	75	1	54	3	2	6	2	2113-04-17 07:17:00.000000	9.7	390	0.8	21	0.03	9700	134	12.7	9.6	386	0.8500000000000001	21	0.03	9700	133.5	12.3	1	0	0	0	1800.67
18017363	26049450	36026655	F	87.6056297377264024	WIDOWED	WHITE	Medicare	English	2118-08-18 13:54:00.000000	2118-08-09 16:27:00.000000	2118-08-09 17:55:00.000000	2118-08-14 13:53:36.000000	8.89375	4.83	2124-09-16	0	2230	0	0		66.5	1	58	6	3	6	1	2118-08-12 03:00:00.000000	9.7	306	1.2	24			135	10.1	8.75	268.5	1.15	23.5			136	10	0	0	1	1	3930.0966748297215
17904720	27311470	36031611	M	87.6364265184300941	MARRIED	HISPANIC/LATINO - DOMINICAN	Medicare	Spanish	2126-09-02 15:21:00.000000	2126-08-21 04:13:00.000000	2126-08-21 05:21:00.000000	2126-08-28 18:39:16.000000	12.4638888888888889	7.55	2131-08-04	0	1809	0	0	152	63.1	1	57	8	3	7	2	2126-08-25 20:00:00.000000	16.3	128	1.3	33	0.01		139	12.8	16.75	139.5	1.4	38	0.01		139	13.100000000000001	1	0	0	0	1049.9999809265137
16442524	28347319	36054363	F	53.3476605921553381	DIVORCED	BLACK/AFRICAN AMERICAN	Medicare	English	2139-05-12 15:20:00.000000	2139-05-07 16:57:00.000000	2139-05-07 18:21:00.000000	2139-05-11 11:11:28.000000	4.9326388888888889	3.7		0		0	0	170	79.9	1	28	2	3	5	1	2139-05-09 07:00:00.000000	16.5	166	1.1	38			138	11	16.5	166	1.05	34.5			137.5	11	0	0	0	0	1763.9166670814157
17536222	26728411	36066456	M	44.9266888650386441	SINGLE	WHITE - OTHER EUROPEAN	Medicare	English	2164-02-07 00:00:00.000000	2163-12-05 16:13:00.000000	2163-12-09 09:50:32.000000	2164-02-08 05:38:43.000000	63.3243055555555556	60.83	2164-02-07	1	64	0	1	178	85	1	45	19	3	2	3	2163-12-12 02:26:00.000000	4.5	171	1	19			138	14.3	11.1	157.4	1.06	15.7			131.5	13.246666666666666	1	1	1	1	6577.440756013617
14150131	29358058	36070307	F	69.3288678008918288	MARRIED	WHITE	Medicare	English	2147-05-09 15:25:00.000000	2147-05-01 08:36:00.000000	2147-05-01 09:33:00.000000	2147-05-07 17:17:53.000000	8.2840277777777778	6.32	2148-10-06	0	524	0	0	152	67.8	1	27	2	4	4	2	2147-05-02 16:00:00.000000	10.3	404	1.3	18			141	11.1	10.3	404	1.3	18			141	11.1	1	0	1	1	2309.9999690055847
19052676	27754463	36084141	M	46.2440715105783745	SINGLE	WHITE	Medicaid	English	2127-05-08 13:03:00.000000	2127-03-31 15:06:00.000000	2127-04-01 10:44:34.000000	2127-04-30 17:09:41.000000	37.9145833333333333	29.27		0		0	0	180	100.1	1	38	19	2	1	3	2127-04-04 05:00:00.000000	15.5	285	1.4	40			136	11	15.35	272	1.4249999999999998	42.25			136.75	10.95	1	1	1	1	2520.599948748946
13963966	21750765	36088584	M	73.2284579660730268	DIVORCED	WHITE	Medicare	English	2152-05-07 00:01:00.000000	2152-03-24 21:28:00.000000	2152-03-25 21:44:36.000000	2152-04-10 23:06:38.000000	43.1063	16.06	2152-05-07	1	44	0	1	180	64.4	1	43	9	3	7	2	2152-03-29 09:00:00.000000	5	149	0.7	8			130	13.4	5.5	148.5	0.6599999999999999	6.2			128.6	12.8	1	0	1	1	5049.123212534934
16860292	27859124	36089716	F	86.94436192685641	DIVORCED	WHITE	Medicare	English	2139-12-18 15:00:00.000000	2139-12-11 13:59:00.000000	2139-12-11 20:35:39.000000	2139-12-14 22:29:35.000000	7.0423611111111111	3.08		0		0	0		62	1	26	5	2	6	2	2139-12-13 12:43:00.000000	7.3	249	0.7	14		4519	116	12	7.3	249	0.7000000000000001	12		4519	117	12	0	0	0	0	686.3333350121975
10559183	20008400	36107959	M	91.00716800246290283033	MARRIED	WHITE	Medicare	English	2116-01-07 16:32:00.000000	2116-01-03 14:50:00.000000	2116-01-03 16:00:00.000000	2116-01-06 18:44:57.000000	4.0708333333333333	3.11	2116-11-14	0	316	0	1	178	75.8	1	41	3	3	6	2	2116-01-04 22:00:00.000000	13.5	214	1.2	20	3.34		133	11.7	13.5	214	1.25	21	3.24		134.5	11.7	0	0	0	0	1109.0056689605117
15025560	25630745	36118323	F	73.2211329140070906	MARRIED	BLACK/AFRICAN AMERICAN	Medicare	English	2144-04-01 14:50:00.000000	2144-03-22 00:13:00.000000	2144-03-22 01:28:00.000000	2144-03-30 16:03:24.000000	10.6090277777777778	8.61		0		0	0	157	74	1	34	9	4	5	3	2144-03-23 11:00:00.000000	12.4	212	0.7	8	0.04	1210	123	11.8	11.95	206.5	0.6666666666666666	9	0.06	1210	126.33333333333333	11.4	1	0	1	1	1976.0000013709068
11301928	25061873	36123058	M	60.19945869983310912886		UNABLE TO OBTAIN	Private	English	2144-03-24 17:30:00.000000	2144-03-13 20:25:00.000000	2144-03-13 20:29:00.000000	2144-03-18 16:33:08.000000	10.8784722222222222	4.84		0		0	0	183	86	1	100	8	3	4	2	2144-03-15 09:00:00.000000	12.6	235	0.7	15	13.13		136	11.1	10.175	199.25	0.8	12.25	13.13		140.25	10.333333333333334	1	0	0	0
16028531	26526364	36154134	M	61.4563898730156992	MARRIED	WHITE	Medicaid	English	2189-07-02 18:30:00.000000	2189-06-16 10:03:00.000000	2189-06-25 15:31:47.000000	2189-06-29 11:52:13.000000	16.3520833333333333	3.85		0		0	0	163	88	1	41	8	4	4	1	2189-06-27 04:00:00.000000	9	153	1.6	22	0.03		140	13.2	10.84	151.6	2.2857142857142856	30.5	0.03		138.27272727272728	10.122222222222224	1	0	1	1	4157.399299971759
13187056	27167252	36168528	F	86.17379839181206493838	SINGLE	UNKNOWN	Medicare	English	2181-03-13 18:30:00.000000	2181-03-05 11:29:00.000000	2181-03-06 08:45:56.000000	2181-03-10 09:46:01.000000	8.2923611111111111	4.04	2188-10-31	0	2797	0	0	160	58	1	48	6	4	7	2	2181-03-07 11:00:00.000000	8.3	151	0.9	14	3.08		137	12.2	10.7	134	0.9	16	5.97		136.42857142857142	12.088888888888889	1	0	1	1	4879.609983086586
19368680	26451324	36173277	M	71.134368141913824	SINGLE	WHITE	Medicare	English	2175-02-25 19:38:00.000000	2175-02-18 17:44:00.000000	2175-02-18 17:49:14.000000	2175-02-23 12:59:54.000000	7.0791666666666667	4.8		0		0	0	173	97.7	1	37	4	2	6	1	2175-02-23 05:58:00.000000	3.9	135	2.4	37			134	7.8	3.9	135	2.3499999999999996	36			135	7.85	0	0	0	0	2015.8999626040459
12009262	27779976	36173319	F	78.2509333994082462	WIDOWED	WHITE	Medicare	English	2115-04-09 15:00:00.000000	2115-04-03 03:15:00.000000	2115-04-03 05:40:00.000000	2115-04-07 16:57:36.000000	6.4895833333333333	4.47		0		0	0	164	97	1	59	7	3	6	2	2115-04-06 07:17:00.000000	10.8	93	1.1	19		29880	135	12	10.8	93	1.1	19		29880	135	12	0	0	1	1	2106.091868219897
13234429	21137619	36184012	F	71.9693699276400609	MARRIED	ASIAN - CHINESE	Medicare	Chinese	2166-01-02 16:00:00.000000	2165-12-20 17:58:00.000000	2165-12-26 09:04:21.000000	2165-12-30 19:00:22.000000	12.9180555555555556	4.41		0		0	0	157	52.5	1	40	11	2	7	2	2165-12-28 08:00:00.000000	8.7	107	0.8	21			136	13	12.749999999999998	105	0.8	19			135.6	10.844444444444443	1	0	1	1	3781.597642019391
12424661	20275815	36185459	F	64.63480172050311848035	DIVORCED	WHITE	Private	English	2124-09-10 15:45:00.000000	2124-08-19 20:33:00.000000	2124-08-19 20:34:24.000000	2124-09-01 19:00:31.000000	21.8	12.93	2125-04-14	0	238	0	1	152	47	1	60	4	3	12	1	2124-08-25 02:11:00.000000	19.2	225	0.8	30	2.34		137	10.4	20.475	197.25	0.65	27.75	2.365		136.75	9.575	0	0	0	0
16773335	20944705	36201281	F	91.1766534243049814	WIDOWED	WHITE	Medicare	English	2178-03-18 15:44:00.000000	2178-03-06 17:33:00.000000	2178-03-06 19:51:00.000000	2178-03-14 22:14:54.000000	11.9243055555555556	8.1		0		0	0		81.1	1	47	6	3	6	2	2178-03-09 23:55:00.000000	13.3	274	1.6	35			141	10.9	12.65	282.5	1.7400000000000002	36.6			143	10.65	1	0	1	1	2544.3023807872087
15530444	20483262	36220002	M	48.25789027853070323542	MARRIED	WHITE	Private	English	2141-04-17 17:06:00.000000	2141-04-05 04:37:00.000000	2141-04-05 06:00:00.000000	2141-04-13 16:56:19.000000	12.5201388888888889	8.46		0		0	0	178	80	0	56	7	4	1	0		8.6	127	3.5	84			138	11.9	12	143.5	2.3666666666666667	61.666666666666664			139.33333333333334	11.95	1	0	1	1	3960.9999267160892
17745354	23633700	36222534	F	51.0470217919443364	SINGLE	BLACK/AFRICAN AMERICAN	Medicare	English	2129-01-27 18:30:00.000000	2129-01-17 15:48:00.000000	2129-01-17 16:52:00.000000	2129-01-21 01:08:52.000000	10.1125	3.35	2129-11-18	0	305	0	1		86.6	1	31	1	4	11	1	2129-01-19 12:00:00.000000	11.5	238	1.1	14	0.04		140	5.5	11.45	231.5	1.1	14	0.04		140	7.45	0	0	0	0	3636.249981470406
12707756	25399769	36226794	F	67.81277162356282501282	MARRIED	UNKNOWN	Other	English	2165-11-05 17:45:00.000000	2165-10-24 20:36:00.000000	2165-10-25 12:23:14.000000	2165-11-01 16:16:29.000000	11.8812	7.16		0		0	0	157	83.2	1	27	12	3	4	2	2165-10-26 13:00:00.000000	9.8	173	0.8	19	0.38		136	10.9	9.95	178	0.75	18.5	0.38		135	10.9	1	0	1	1	2514.100001618266
14478574	26948202	36237769	F	76.25761648745519713262		WHITE	Medicare	English	2127-04-09 13:40:00.000000	2127-04-05 02:13:00.000000	2127-04-05 04:16:00.000000	2127-04-09 15:50:56.000000	4.4770833333333333	4.48	2127-04-09	1	4	1	1		57.5	1	61	13	4	11	3	2127-04-06 10:00:00.000000	13.2	323	0.8	39			134	8.4	12.45	342.5	0.75	35			135.5	9.2	0	0	1	1	2401.128942117095
19830933	24879029	36243537	M	45.46671681606533020116	MARRIED	PATIENT DECLINED TO ANSWER	Private	English	2178-06-29 14:37:00.000000	2178-06-20 11:09:00.000000	2178-06-20 11:09:50.000000	2178-06-26 18:52:22.000000	9.1444444444444444	6.32		0		0	0	180	85.3	1	25	4	4	1	1	2178-06-21 14:00:00.000000	12.6	240	0.8	8	0.89		142	13.5	13.55	236	0.8333333333333334	9	0.72		143	13.5	1	0	0	0	2133.230779087171
18710904	25245862	36245474	M	36.68978619350701422314	SINGLE	BLACK/AFRICAN AMERICAN	Medicaid	English	2178-09-23 17:20:00.000000	2178-09-09 22:32:00.000000	2178-09-10 16:44:56.000000	2178-09-14 11:17:34.000000	13.7833333333333333	3.77		0		0	0		117	1	27	4	2	1	2	2178-09-11 18:09:00.000000	7.3	74	0.9	14			142	15.3	7.3	74	0.95	13.75			140.25	15.3	0	0	0	0
19291358	28592935	36246235	M	47.99254968851701976589		UNKNOWN	Medicaid	English	2177-01-07 17:43:00.000000	2176-12-28 12:30:00.000000	2176-12-28 13:59:00.000000	2177-01-06 18:33:27.000000	10.2173611111111111	9.19		0		0	0	168	93.6	1	71	6	3	3	2	2177-01-01 14:00:00.000000	18.6	208	1.1	18	0.63		143	12.4	16.950000000000003	184	0.9666666666666668	17	0.9166666666666666		143.33333333333334	11.600000000000001	1	0	0	0	4544.165097430348
16056736	27430269	36248154	F	85.247471235205395	MARRIED	WHITE - OTHER EUROPEAN	Medicare	English	2186-04-10 17:27:00.000000	2186-03-31 20:08:00.000000	2186-04-01 00:33:14.000000	2186-04-05 16:33:02.000000	9.8881944444444444	4.67		0		0	0		68.6	1	43	8	3	7	2	2186-04-02 06:12:00.000000	13.2	116	0.8	30	1.39		137	12.4	14.5	124	0.9	28	1.53		136	12.6	1	0	1	1	2698.034120608121
10606352	23011502	36259386	F	78.74986432131147142017	WIDOWED	WHITE	Medicare	English	2167-10-07 16:15:00.000000	2167-10-01 21:10:00.000000	2167-10-02 10:44:21.000000	2167-10-07 16:17:43.000000	5.7951388888888889	5.23	2167-10-11	0	10	1	1	152	79	1	41	9	3	7	3	2167-10-03 13:00:00.000000	8.7	260	1.1	29	0.06	4382	149	10.2	8.95	240	1.125	27.25	0.075	4382	146.4	9.95	0	0	0	0	253.00000455975533
17402093	22358241	36267086	F	66.6579742563378071	DIVORCED	WHITE	Medicare	English	2118-09-26 09:15:00.000000	2118-08-29 01:06:00.000000	2118-08-29 01:43:14.000000	2118-09-01 23:55:18.000000	28.3395833333333333	3.93	2118-09-26	1	28	1	1		47.4	1	51	6	3	6	2	2118-08-30 13:20:00.000000	15.9	320	0.6	11	0.04		139	7.2	18.599999999999998	329.14285714285717	0.5444444444444444	12.666666666666666	0.036666666666666674		138.1	8.471428571428572	1	0	0	0	5046.699695281684
13960922	26878949	36278862	M	57.14755627775557027943		WHITE	Private	English	2135-03-04 15:11:00.000000	2135-02-23 21:27:00.000000	2135-02-23 21:29:06.000000	2135-03-01 19:16:26.000000	8.7388888888888889	5.91		0		0	0	178	99.2	1	39	8	4	3	2	2135-02-24 22:24:00.000000	17.9	261	1.4	18	13.65		141	14.2	15.549999999999999	246	1.475	22.25	9.1		140.5	13.75	1	0	1	1	2486.950771614909
10969205	24346474	36288324	M	90.1926978094888686	MARRIED	WHITE	Medicare	Modern Greek (1453-)	2183-03-23 17:05:00.000000	2183-03-12 20:00:00.000000	2183-03-12 21:59:00.000000	2183-03-22 22:33:05.000000	10.8784722222222222	10.02	2183-03-23	1	11	1	1	152	49.9	1	51	10	3	6	2	2183-03-14 08:00:00.000000	7.5	130	0.5	13		1134	143	10.5	14.5	136	0.45	12.5		1134	140.5	10.45	1	0	1	1	9498.799920625053
17069955	20185564	36297508	M	68.9853856408140965	MARRIED	WHITE	Medicare	English	2183-01-10 14:37:00.000000	2182-12-26 20:56:00.000000	2182-12-26 20:57:21.000000	2183-01-04 11:57:16.000000	14.7368055555555556	8.62		0		0	0		114.3	1	38	7	3	7	2	2182-12-28 15:53:00.000000	13.7	91	0.9	30			135	9	13.05	88	0.8333333333333334	26.333333333333332			135.33333333333334	8.85	1	0	0	0	2659.781369023025
13483947	20464621	36301931	M	47.68951810641224783081	SINGLE	WHITE	Private	English	2174-09-17 16:49:00.000000	2174-09-09 20:11:00.000000	2174-09-09 20:11:49.000000	2174-09-14 19:33:23.000000	7.8597222222222222	4.97		0		0	0	177	106.6	1	74	9	3	2	1	2174-09-11 12:49:00.000000	23.3	196	1	17	1.33		140	15.3	21.599999999999998	173.5	0.72	12.2	1.0166666666666666		135.8	16.266666666666666	1	0	1	1	4400.039533575997
15949167	27265225	36303394	M	63.60022799191282005416	SINGLE	WHITE	Private	English	2119-08-23 18:00:00.000000	2119-08-08 05:29:00.000000	2119-08-08 07:19:00.000000	2119-08-18 17:44:18.000000	15.5215277777777778	10.43		0		0	0	178	100.3	1	53	8	3	7	2	2119-08-14 04:00:00.000000	19	66	1	54	0.03	9323	129	8.6	17.65	65	1.0333333333333334	58	0.03	9323	132.66666666666666	8.3	0	0	1	1	4980.781456723809
15857729	28057716	36307337	F	47.5606395516153978	SINGLE	BLACK/AFRICAN AMERICAN	Medicaid	English	2145-07-30 15:00:00.000000	2145-07-24 00:16:00.000000	2145-07-24 02:10:00.000000	2145-07-28 19:19:43.000000	6.6138888888888889	4.72	2150-12-27	0	1982	0	0		84.5	1	51	4	3	2	2	2145-07-26 12:47:00.000000	14.3	263	1.3	20		4677	140	11.2	14.45	253.5	1.2333333333333334	20.666666666666668		4677	136.33333333333334	10.7	0	0	0	0	1310.0000099092722
19196195	26286212	36307355	M	63.08732984645188061006		UNKNOWN	Private	English	2122-02-10 15:30:00.000000	2122-02-01 21:31:00.000000	2122-02-01 22:31:00.000000	2122-02-08 14:50:24.000000	8.7493055555555556	6.68		0		0	0	163	103	1	30	8	3	6	2	2122-02-03 02:00:00.000000	8.4	267	1.2	18			136	13.6	8.4	267	1.2	18			136	13.6	1	0	0	0	3585.6999204456806
16445453	25764276	36322139	M	62.20976389170285272048		WHITE		English	2146-03-27 15:30:00.000000	2146-03-18 14:45:00.000000	2146-03-19 10:01:37.000000	2146-03-22 12:39:17.000000	9.03125	3.11		0		0	0		75.5	0	25	8	3	5	0		20.1	171	1	18	0.12		133	13.4	20.1	124.44444444444444	0.9166666666666666	21.333333333333332	0.13		136.06666666666666	10.854999999999999	1	0	1	1	9818.627579728141
13216036	27012508	36322246	F	65.5388297348059643	MARRIED	WHITE	Medicare	English	2165-07-23 19:39:00.000000	2165-07-15 23:33:00.000000	2165-07-15 23:34:17.000000	2165-07-19 20:38:02.000000	7.8375	3.88		0		0	0	157	77.9	1	49	7	2	4	1	2165-07-18 05:00:00.000000	49.2	394	2.4	56	0.01		135	8.8	49.2	394	2.1333333333333333	51.666666666666664	0.01		139	8.5	1	0	1	1	2892.384117034264
12525991	28824268	36330305	M	65.0253675797294822	MARRIED	BLACK/AFRICAN AMERICAN	Medicare	English	2183-01-16 17:15:00.000000	2183-01-10 17:59:00.000000	2183-01-10 18:00:37.000000	2183-01-14 16:51:14.000000	5.9694444444444444	3.95	2190-11-23	0	2874	0	0	188	62.7	0	37	3	2	4	0		6.6	245	1.5	32			131	10.5	6.6	245	1.5	31			133.5	10.5	0	0	1	1	2289.567536190152
19832355	22483349	36331629	M	76.3995449136006629	MARRIED	WHITE	Medicare	English	2161-06-19 17:15:00.000000	2161-05-26 09:57:00.000000	2161-05-27 19:19:19.000000	2161-06-08 17:34:10.000000	24.3041666666666667	11.93	2164-11-21	0	1275	0	0	145	53.1	1	54	8	3	4	3	2161-05-29 03:00:00.000000	9.1	154	1.1	31			144	12.5	9.2	144	1.1333333333333335	29			144.33333333333334	12.2	1	0	0	0	1383.0833181515336
14740363	29148149	36333109	F	56.31120918915860351949	SINGLE	WHITE	Medicaid	English	2175-05-18 17:49:00.000000	2175-04-24 16:00:00.000000	2175-05-05 09:00:33.000000	2175-05-08 17:28:38.000000	24.0756944444444444	3.35		0		0	0	165	75.6	1	41	7	3	4	2	2175-05-06 13:47:00.000000	6.9	377	0.6	15			140	7.8	13.633333333333333	311.3333333333333	0.65	12.75			139.5	8.66	1	0	1	1	6976.964633996598
10755736	26615766	36333767	M	54.79081129771493968383	SINGLE	WHITE	Private	English	2174-11-01 16:31:00.000000	2174-10-16 20:06:00.000000	2174-10-16 20:28:12.000000	2174-10-23 19:50:29.000000	15.8506944444444444	6.97	2174-11-04	0	19	1	1	170	60.9	1	44	2	3	13	2	2174-10-20 17:11:00.000000	16.9	232	1	60			131	7.4	16.9	232	0.8333333333333334	52.333333333333336			131.66666666666666	7.4	0	0	0	0	2646.388669066131
10050532	28769042	36336444	M	53.14509596072984182785	DIVORCED	WHITE	Private	English	2154-03-27 17:45:00.000000	2154-02-22 23:53:00.000000	2154-02-22 23:54:07.000000	2154-03-11 13:00:18.000000	32.7444444444444444	16.55		0		0	0	173	91	1	56	8	3	3	3	2154-02-25 01:02:00.000000	10.6	201	1.1	27	4.1	34478	128	14	12.25	211	1.2000000000000002	33.333333333333336	5	34478	129	14.3	1	0	0	0
18308539	26757969	36363953	F	83.59268923070183604295		UNKNOWN	Medicare	English	2137-08-13 16:19:00.000000	2137-08-05 11:24:00.000000	2137-08-05 11:24:50.000000	2137-08-10 21:13:23.000000	8.2048611111111111	5.41		0		0	0	163	64	1	49	5	3	6	2	2137-08-07 03:25:00.000000	21.4	358	0.4	16			126	11.5	19.25	371.5	0.3666666666666667	15.666666666666666			130.5	11.2	1	0	0	0	2733.8999627530575
15936435	20588642	36364051	F	44.69193089026514536177	MARRIED	WHITE	Medicaid	English	2154-10-12 16:33:00.000000	2154-09-10 17:20:00.000000	2154-09-10 20:29:00.000000	2154-10-12 16:33:36.000000	31.9673611111111111	31.84		0		0	0	173	143	1	53	8	2	1	3	2154-09-11 22:00:00.000000	13.5	400	1	22			136	15.5	13.35	394.5	0.9666666666666667	20.666666666666668			139	14.9	1	0	1	1	2130.3
10652536	24696812	36369973	F	54.48231720338843835046	MARRIED	WHITE	Private	English	2189-07-08 14:45:00.000000	2189-06-26 03:54:00.000000	2189-06-26 04:48:00.000000	2189-07-02 22:40:17.000000	12.4520833333333333	6.74		0		0	0	160	91	1	44	3	4	5	3	2189-06-28 06:00:00.000000	12.1	236	1.1	33	1.7		142	9.7	11.64	238.4	1.1	30.5	2.295		142.5	8.25	1	0	0	0	6029.337971312925
11767709	21378275	36378878	M	81.82942914864969283683	WIDOWED	WHITE	Medicare	English	2160-11-05 17:32:00.000000	2160-10-29 22:37:00.000000	2160-10-30 00:08:00.000000	2160-11-03 21:25:12.000000	6.7881944444444444	4.89		0		0	0	178	66.9	1	42	4	2	6	2	2160-11-01 08:00:00.000000	6.7	167	1.8	56	0.1	18301	142	9.5	6.7	167	1.75	56.5	0.1	18301	141	9.5	1	0	0	0	572.0515522509813
13370388	22431127	36380238	M	64.8742531587884806	MARRIED	WHITE	Medicare	English	2123-12-02 15:00:00.000000	2123-11-16 18:23:00.000000	2123-11-16 23:57:07.000000	2123-12-02 17:37:13.000000	15.8590277777777778	15.74	2123-12-02	1	16	1	1	165	71.3	1	40	9	3	11	2	2123-11-18 01:54:00.000000	12	221	0.6	14	0.09		137	7.1	14.4	250	0.6499999999999999	15	0.5633333333333334		136	7.449999999999999	1	0	1	1	2823.81
17552707	27457325	36386790	M	69.6646004566835139	MARRIED	WHITE	Medicare	English	2161-09-07 16:40:00.000000	2161-08-30 22:48:00.000000	2161-08-31 00:06:00.000000	2161-09-05 21:00:49.000000	7.7444444444444444	5.87	2162-04-14	0	227	0	1	168	69	1	30	5	3	4	2	2161-09-01 00:22:00.000000	6.8	130	1.2	30			133	13.1	6.8	130	1.2	29.5			135	13.1	0	0	0	0
19342008	28253063	36395875	F	91.74631454396445826785	WIDOWED	WHITE	Medicare	English	2158-10-08 14:20:00.000000	2158-09-30 14:03:00.000000	2158-09-30 14:05:15.000000	2158-10-06 11:25:04.000000	8.0118055555555556	5.89		0		0	0	150	64.2	1	24	1	1	5	2	2158-10-02 04:01:00.000000	8.7	341	0.8	24	0.33		133	9.2	8.7	341	0.8	24	0.33		135	9.2	0	0	0	0	1360
16712364	20115732	36404822	F	65.5842152448087691	SINGLE	PORTUGUESE	Medicare	English	2174-08-08 14:00:00.000000	2174-08-01 19:58:00.000000	2174-08-01 21:57:00.000000	2174-08-08 15:02:13.000000	6.7513888888888889	6.71	2174-08-10	0	9	1	1		73.5	1	68	7	3	5	1	2174-08-06 04:59:00.000000	19	163	0.7	41			146	12.7	17.8	146	0.75	36.5			146.5	11.8	1	0	0	0	5448.266421750188
17995511	23937309	36427208	M	57.52078865215087226795	SINGLE	BLACK/AFRICAN AMERICAN	Private	English	2145-07-16 12:59:00.000000	2145-07-10 05:08:00.000000	2145-07-10 07:34:00.000000	2145-07-15 02:11:59.000000	6.3270833333333333	4.78		0		0	0	173	70	1	35	7	3	5	2	2145-07-12 01:00:00.000000	12.6	152	1.2	16	0.07		140	11.7	15.199999999999998	153.33333333333334	1.2	16	0.05		140.33333333333334	11.733333333333334	1	0	1	1	3313.5747653841972
15040842	21797298	36427385	F	38.0735552653370155	SINGLE	BLACK/AFRICAN AMERICAN	Medicare	English	2197-02-08 14:45:00.000000	2197-01-27 06:05:00.000000	2197-01-27 08:38:00.000000	2197-02-02 21:02:48.000000	12.3611111111111111	6.52	2197-02-08	1	12	1	1	168	121.6	1	28	2	3	3	1	2197-01-29 00:21:00.000000	16.3	324	1	20			135	8.3	17.85	339	0.95	19			133.5	8.55	0	0	0	0
17135528	20198728	36462006	F	85.86260540195876219663	SINGLE	BLACK/CAPE VERDEAN	Medicaid	Kabuverdianu	2147-12-10 15:25:00.000000	2147-11-12 01:26:00.000000	2147-11-12 02:31:00.000000	2147-11-30 21:53:22.000000	28.5826388888888889	18.81		0		0	0	157	67.9	1	28	3	2	9	2	2147-11-17 14:18:00.000000	11.1	231	0.9	10	0.05		140	13.6	11.1	231	0.9	10	0.05		140	13.6	0	0	0	0	4597.900121450424
16662810	25677922	36465538	M	89.46401693184853390963	MARRIED	WHITE	Medicare	English	2188-06-28 13:42:00.000000	2188-06-18 11:29:00.000000	2188-06-18 13:21:00.000000	2188-06-28 13:49:15.000000	10.0923611111111111	10.02	2188-07-02	0	14	1	1	178	60.5	1	35	4	2	6	2	2188-06-21 10:50:00.000000	11.8	185	0.6	25	0.22		141	11.7	11.8	185	0.7000000000000001	24	0.215		142.33333333333334	11.7	1	0	1	1	1573.749992363155
12556337	21589556	36528315	F	74.35247939113732204341		WHITE	Medicare	English	2127-05-22 15:35:00.000000	2127-05-09 17:46:00.000000	2127-05-10 19:06:03.000000	2127-05-20 18:11:34.000000	12.9090277777777778	9.96		0		0	0	157	59	1	33	10	3	7	3	2127-05-12 15:49:00.000000	11.6	290	0.8	21	0.87		137	13.9	12.1	298	0.8666666666666667	21	0.87		139.66666666666666	13.200000000000001	1	0	1	1	1393.633509248495
17929955	24147356	36543272	F	76.93313702513219545762	WIDOWED	UNKNOWN	Medicare	English	2179-12-20 18:21:00.000000	2179-12-07 19:42:00.000000	2179-12-07 19:42:49.000000	2179-12-17 02:38:54.000000	12.9437	9.29	2179-12-20	0	13	1	1		85.1	1	25	8	3	7	2	2179-12-09 03:00:00.000000	15.5	163	0.8	16			140	14.3	15.4	165	0.75	16			140	13.9	0	0	0	0	289.9999988079071
10047727	29458668	36545517	M	81.9573107997193946	SINGLE	WHITE	Medicare	English	2151-01-30 20:24:00.000000	2150-12-16 14:04:00.000000	2150-12-22 06:50:13.000000	2150-12-27 20:26:17.000000	45.2638888888888889	5.57	2151-03-11	0	85	0	1	188	75.9	1	44	5	3	8	2	2150-12-25 08:00:00.000000	5.8	210	1.1	61	0.02		137	6.4	8.85	204.66666666666666	1.1	65	0.02		137	7.233333333333334	1	0	1	1	7818.072404116392
18374909	20989940	36547031	M	69.6418605868012015	MARRIED	ASIAN - CHINESE	Medicare	Chinese	2155-09-08 17:17:00.000000	2155-08-23 15:28:00.000000	2155-08-23 16:05:00.000000	2155-08-30 21:31:00.000000	16.0756944444444444	7.23		0		0	0		63.9	1	57	8	2	5	3	2155-08-25 04:17:00.000000	4	64	1	23			137	9.4	5.475	67.5	1.0000000000000002	22.714285714285715			142	9.7	0	0	0	0	1637.500006183982
12678659	23586555	36547286	F	76.85906132859248875479	MARRIED	WHITE	Private	English	2116-11-18 13:30:00.000000	2116-11-09 18:22:00.000000	2116-11-09 18:22:47.000000	2116-11-12 18:57:36.000000	8.7972222222222222	3.02		0		0	0	165	68.2	1	53	5	4	6	1	2116-11-12 08:00:00.000000	13.2	221	0.9	18	0.56		137	12.7	10.975000000000001	225.75	0.925	24.5	0.56		136.5	11.925	1	0	1	1	2207.8186322003603
12019898	28261248	36550047	M	87.84688713236703336418		UNKNOWN	Medicare	English	2127-11-15 16:59:00.000000	2127-11-06 07:39:00.000000	2127-11-06 07:39:53.000000	2127-11-11 00:38:12.000000	9.3888888888888889	4.71		0		0	0	165	88	1	24	4	3	6	2	2127-11-08 05:00:00.000000	9.1	176	1.3	33	4.98		144	7.4	8.75	171.5	1.3	33	4.989999999999999		144	7.5	1	0	1	1	2116.908658189699
11984647	25146721	36560987	M	52.229165031525521283	MARRIED	WHITE	Private	English	2128-05-14 15:00:00.000000	2128-03-24 16:49:00.000000	2128-03-24 16:50:34.000000	2128-05-02 17:02:47.000000	50.9243055555555556	39.01	2134-03-28	0	2195	0	0	175	86	1	48	14	3	3	2	2128-03-26 12:00:00.000000	22.7	239	1.7	42	24.15		138	14.4	26.7	235.5	1.75	46	19.34		137.5	15.5	1	0	1	1	3333.457390755415
16736277	25884364	36561349	M	54.37880706490491235948	DIVORCED	WHITE	Private	English	2173-06-03 13:15:00.000000	2173-05-19 08:33:00.000000	2173-05-26 11:28:30.000000	2173-05-30 18:18:57.000000	15.1958333333333333	4.29		0		0	0	168	61	1	40	8	3	4	2	2173-05-27 15:00:00.000000	13	197	1.7	32	0.11		140	15.2	11.9	130.5	1.2833333333333334	25.666666666666668	0.15		134.63636363636363	12.661538461538461	1	0	1	1	5619.607416860759
15213253	20384962	36597046	F	58.1557300821555753902	MARRIED	WHITE	Private	English	2157-03-13 17:00:00.000000	2157-02-26 21:06:00.000000	2157-02-27 00:17:19.000000	2157-03-04 20:25:46.000000	14.8291666666666667	5.84		0		0	0	152	149.8	1	40	5	3	4	2	2157-03-01 20:00:00.000000	9.1	364	0.4	10			121	8.4	9.1	364	0.5	10.666666666666666			125.66666666666667	8.4	1	0	0	0	1169.4470361880958
19180828	22706419	36602755	M	75.0950866518332746	MARRIED	BLACK/AFRICAN AMERICAN	Medicare	English	2143-02-18 17:00:00.000000	2143-02-04 21:47:00.000000	2143-02-05 22:23:09.000000	2143-02-10 18:38:38.000000	13.8006944444444444	4.84	2143-08-23	0	200	0	1	175	83.3	1	23	5	1	9	1	2143-02-10 05:00:00.000000	11.8	311	1.4	25	0.12		143	12.9	12.5	349	1.56	35.8	0.12		147.4	13.100000000000001	1	0	0	0	675.2965028081089
17396346	28139705	36616056	F	71.8714456594683951	SINGLE	BLACK/CAPE VERDEAN	Medicaid	Kabuverdianu	2184-11-30 17:00:00.000000	2184-11-14 12:44:00.000000	2184-11-14 15:36:00.000000	2184-11-19 18:48:37.000000	16.1777777777777778	5.13	2191-11-27	0	2569	0	0		94.1	1	27	2	2	7	1	2184-11-16 14:54:00.000000	7.3	336	1.1	18			136	8.8	7.3	336	1.05	18			137.5	8.8	1	0	0	0	1240.1595067977905
10387377	20139513	36635389	F	81.6653800767710176	WIDOWED	WHITE	Medicare	English	2192-09-17 13:33:00.000000	2192-08-31 17:15:00.000000	2192-09-07 10:18:07.000000	2192-09-10 16:42:15.000000	16.8458333333333333	3.27		0		0	0	165	61	1	35	5	2	7	2	2192-09-08 15:04:00.000000	8.2	409	1.2	29	0.05		139	8.8	10.842857142857143	345.2857142857143	1.1285714285714286	26.142857142857142	0.045		139.57142857142858	8.200000000000001	1	0	1	1	2566.9720898959786
18787194	23173255	36647574	F	80.0959163148451346	SINGLE	WHITE	Medicare	English	2128-02-21 15:12:00.000000	2128-02-05 12:24:00.000000	2128-02-11 09:07:37.000000	2128-02-21 23:44:03.000000	16.1166666666666667	10.61	2128-02-21	1	16	1	1	165	61.8	1	54	7	4	8	3	2128-02-18 20:00:00.000000	24.7	146	0.8	9			130	10.1	20.75	132.5	0.8	9			132.7	8.681818181818182	1	0	0	0
11226194	24922551	36651590	M	83.98589884697451735197	MARRIED	WHITE	Medicare		2176-01-12 12:25:00.000000	2175-12-27 02:12:00.000000	2175-12-30 10:44:24.000000	2176-01-10 14:56:23.000000	16.4256944444444444	11.17		0		0	0	183	96.3	1	44	14	3	6	2	2175-12-31 15:52:00.000000	8.4	98	2	35	0.99	25881	133	12.2	7.85	131.75	1.8399999999999999	33.4	0.6759999999999999	25881	135.2	11.399999999999999	1	0	1	1	5269.606205735356
12257086	26364430	36656594	M	61.8390958749419715	DIVORCED	WHITE	Private	English	2187-11-19 18:44:00.000000	2187-11-03 21:26:00.000000	2187-11-11 11:31:43.000000	2187-11-15 16:16:12.000000	15.8875	4.2		0		0	0	173	90	1	28	6	2	4	1	2187-11-13 04:00:00.000000	9.1	199	0.9	25			147	13.1	15.783333333333333	133.14285714285714	0.8	20.25			140.125	9.616666666666665	1	0	1	1	12451.151289701462
13109280	20548998	36660763	F	83.68595882243066849437	DIVORCED	WHITE	Medicare	English	2110-09-14 14:20:00.000000	2110-09-08 12:59:00.000000	2110-09-08 16:15:47.000000	2110-09-14 16:09:11.000000	6.05625	6	2110-09-14	1	6	1	1	152	47	1	74	13	3	10	3	2110-09-10 16:03:00.000000	8.2	184	0.8	19	1		127	11.1	10.75	117.25	0.8000000000000002	19.666666666666668	0.6		131.4	10.455555555555556	1	0	1	1	14238.243872847408
12229037	22647903	36668466	M	36.64876886800775619696	SINGLE	WHITE	Private	English	2153-09-10 16:00:00.000000	2153-08-25 22:59:00.000000	2153-08-26 00:13:00.000000	2153-09-08 12:21:22.000000	15.7090277777777778	13.51		0		0	0	175	95.2	1	36	4	2	2	3	2153-08-28 01:00:00.000000	9.7	239	0.9	12	0.33		137	12.7	9.7	239	0.9	12.5	0.33		136	12.7	0	0	1	1	953.8000017628074
16053241	28799073	36673517	F	94.3102970846117855	WIDOWED	WHITE	Medicare	English	2127-05-01 14:35:00.000000	2127-04-24 17:19:00.000000	2127-04-24 18:06:00.000000	2127-05-01 15:14:49.000000	6.8861111111111111	6.88		0		0	0		49.9	1	46	6	1	6	2	2127-04-25 18:14:00.000000	7.2	221	1.1	26			142	10.9	7.2	221	1.1	26			142	10.9	0	0	0	0
10834554	24875226	36697201	M	51.75202993266564816387	SINGLE	WHITE	Private	English	2187-10-17 12:00:00.000000	2187-10-02 16:09:00.000000	2187-10-02 16:10:22.000000	2187-10-06 16:10:26.000000	14.8270833333333333	4		0		0	0		101.7	0	39	3	3	3	0		13.5	287	0.9	25	0.9	2829	140	12.5	11.700000000000001	406.75	0.8400000000000001	24.6	0.9	2829	138.25	9.675	0	0	0	0	1045.5329516977072
17967695	26391246	36697287	M	61.47405403662351110892	DIVORCED	WHITE	Medicaid	English	2132-06-29 12:20:00.000000	2132-06-22 03:28:00.000000	2132-06-22 04:47:00.000000	2132-06-26 07:05:20.000000	7.3694444444444444	4.1	2133-01-03	0	195	0	1		125	1	48	3	3	7	2	2132-06-25 04:00:00.000000	20.5	309	0.8	20			109	11.6	20.5	309	0.8	18.5			111.625	11.6	0	0	0	0	1804.416664801538
17419788	27049947	36700150	M	50.9391910021300946	SINGLE	WHITE	Private	English	2178-12-19 19:12:00.000000	2178-12-10 00:00:00.000000	2178-12-10 20:34:08.000000	2178-12-15 18:20:38.000000	9.8	4.91	2181-02-01	0	784	0	0	173	66.9	1	23	2	2	5	2	2178-12-12 00:00:00.000000	9.8	174	1.2	30			141	13.4	9.25	180.5	1.2666666666666666	30.333333333333332			142.33333333333334	13.350000000000001	0	0	0	0	1490.0000095367432
19059343	29356798	36707858	F	65.7383187037635321	MARRIED	WHITE	Medicare	English	2146-10-23 14:03:00.000000	2146-09-27 21:00:00.000000	2146-09-27 21:01:25.000000	2146-10-04 22:24:25.000000	25.7104166666666667	7.06		0		0	0	173	190	1	50	8	2	5	2	2146-09-29 03:10:00.000000	5.5	180	1	14			138	13	5.5	180	1	13.5			138.5	13	1	0	1	1	2562.566550509073
19696359	21237722	36712046	F	42.4790450197707577746	SINGLE	WHITE	Medicaid	English	2131-08-07 20:00:00.000000	2131-06-24 23:13:00.000000	2131-06-25 01:44:00.000000	2131-07-01 23:42:00.000000	43.8659722222222222	6.92		0		0	0	163	97.1	1	64	10	3	5	1	2131-06-27 03:24:00.000000	32.7	42	0.9	31	0.24	1343	132	12.4	32.08888888888889	117.33333333333333	1.35	23.75	0.138	1694	136.9090909090909	9.10625	0	0	1	1	9106.976275581867
17632072	26934131	36724931	F	61.6483163522024058326	SINGLE	WHITE	Medicaid	English	2170-10-03 20:25:00.000000	2170-08-25 19:01:00.000000	2170-08-25 19:02:01.000000	2170-09-01 18:49:27.000000	39.0583333333333333	6.99		0		0	0	168	74	1	54	4	3	5	2	2170-08-27 06:00:00.000000	15.4	438	0.7	7	9.55		131	10.5	11.825	369.25	0.95	12.875	9.55		135.875	9.125	1	0	0	0
18779399	27565247	36730668	M	79.79382109821859357783		WHITE	Medicare	English	2167-10-29 15:00:00.000000	2167-10-17 22:29:00.000000	2167-10-18 00:01:00.000000	2167-10-21 17:01:56.000000	11.6881944444444444	3.71	2169-01-23	0	464	0	0	168	59.2	1	52	1	2	8	1	2167-10-19 03:00:00.000000	7.1	214	1.1	23	0.02		142	10.1	7.1	214	1.0333333333333334	22.333333333333332	0.02		141	10.1	0	0	0	0	1289.9999964237213
15555498	21640857	36731640	M	68.42871119239663930581	MARRIED	WHITE	Medicare	English	2156-06-12 18:15:00.000000	2156-06-05 14:00:00.000000	2156-06-06 07:58:39.000000	2156-06-11 15:14:07.000000	7.1770833333333333	5.3		0		0	0	178	94	1	42	9	1	4	1	2156-06-11 11:59:00.000000	5.9	165	1	21			142	13.1	12.280000000000001	147	0.9	18.333333333333332			137.8	10.891666666666664	1	0	1	1	10029.352885141969
17586874	28611521	36751895	F	63.63416477598718414397	MARRIED	WHITE	Private	English	2187-09-13 17:25:00.000000	2187-08-20 14:58:00.000000	2187-08-23 14:05:26.000000	2187-08-27 18:43:54.000000	24.1020833333333333	4.19	2187-10-20	0	61	0	1	163	48.1	1	32	2	3	11	3	2187-08-25 08:00:00.000000	18	518	0.5	8			142	10.2	18	518	0.5	8			142	10.2	0	1	1	1	4339.999998807907
18749775	26585465	36771475	M	64.55328423042500284439	MARRIED	UNKNOWN	Other	English	2147-07-29 18:43:00.000000	2147-07-22 01:59:00.000000	2147-07-22 02:57:00.000000	2147-07-26 18:08:16.000000	7.6972222222222222	4.63		0		0	0	178	105.9	1	40	8	2	4	1	2147-07-23 10:00:00.000000	13.7	225	1.1	18	0.87		136	15.1	16.533333333333335	220.66666666666666	1.05	18.75	0.835		136	15.633333333333333	1	0	1	1	5075.270157661289
13602608	28349716	36778363	F	46.5229923660963903	MARRIED	BLACK/AFRICAN AMERICAN	Medicare	English	2158-07-28 20:00:00.000000	2158-07-10 12:04:00.000000	2158-07-16 09:28:27.000000	2158-07-23 00:05:33.000000	18.3305555555555556	6.61		0		0	0		65	1	41	2	3	3	1	2158-07-18 18:15:00.000000	15.3	358	0.6	7			130	10.7	15.3	358	0.6	7.5			128.5	10.7	0	0	0	0	2299.133354920894
14192456	25279151	36789258	M	26.72711494479459280879	SINGLE	WHITE	Private	English	2184-12-10 12:00:00.000000	2184-09-22 13:45:00.000000	2184-11-15 11:01:32.000000	2184-11-27 22:32:41.000000	78.9270833333333333	12.48	2185-09-05	0	348	0	1		65	0	62	8	4	3	0		0.1	19	0.9	16			129	6.8	0.13333333333333333	24.666666666666668	0.9	14.666666666666666			132	6.8999999999999995	0	0	0	0	8744.000004291534
19214565	23128143	36790725	F	50.71409085543892055739	MARRIED	BLACK/AFRICAN AMERICAN	Medicaid	English	2178-12-04 19:00:00.000000	2178-09-18 19:35:00.000000	2178-09-28 10:28:45.000000	2178-10-06 18:28:01.000000	76.9756944444444444	8.33		0		0	0	163	48.6	1	31	2	4	3	1	2178-09-29 21:00:00.000000	4	192	0.7	11			138	11.7	3.65	169.5	0.6499999999999999	11			138	11.6	0	0	0	0
18313251	20286333	36792448	F	53.73586865390313515118	MARRIED	UNABLE TO OBTAIN	Private	English	2131-10-14 12:26:00.000000	2131-09-26 18:29:00.000000	2131-10-02 16:44:59.000000	2131-10-07 15:48:27.000000	17.7479166666666667	4.96		0		0	0	152	56	0	86	11	2	3	0		10.7	277	0.8	25			139	12.8	13.483333333333334	269.1666666666667	0.72	21.4			136.55555555555554	9.916666666666666	1	0	1	1	10590.651304850355
16825498	25497780	36795035	M	70.1201012692345836	MARRIED	WHITE	Medicare	English	2140-03-01 17:20:00.000000	2140-02-13 20:01:00.000000	2140-02-14 20:05:56.000000	2140-02-21 06:18:53.000000	16.8881944444444444	6.43		0		0	0	173	99.7	1	15	1	1	5	1	2140-02-16 00:42:00.000000	7.2	233	0.8	9			139	13.9	7.2	233	0.8	9			139	13.9	0	0	0	0	2690.000015974045
15014154	24478345	36812052	M	76.45605417473589808644	SINGLE	WHITE	Medicare	English	2170-07-10 18:41:00.000000	2170-06-16 13:41:00.000000	2170-06-16 14:47:00.000000	2170-06-23 20:54:12.000000	24.2083333333333333	7.26	2170-07-22	0	36	0	1	178	51.4	1	52	10	3	5	1	2170-06-18 00:38:00.000000	13.9	131	2.1	52	0.06	15014	144	10.4	13.833333333333334	130	2.1333333333333333	48.666666666666664	0.06333333333333334	15014	144.66666666666666	10.299999999999999	1	0	1	1	10486.450998604298
18669132	21506797	36851053	M	40.25819068818299465377	DIVORCED	OTHER	Private	English	2139-04-12 15:24:00.000000	2139-04-05 07:15:00.000000	2139-04-05 08:10:46.000000	2139-04-10 16:42:18.000000	7.3395833333333333	5.36		0		0	0	175	105	1	29	8	3	2	1	2139-04-06 13:00:00.000000	21.3	336	0.9	20			139	13	19.025000000000002	302.4	0.95	17.5			138.4	9.807692307692308	1	0	1	1	11432.004733659327
11503970	29267238	36860142	M	68.89532913946248119207	WIDOWED	WHITE	Medicare	English	2127-12-31 20:30:00.000000	2127-11-24 00:17:00.000000	2127-11-24 00:21:30.000000	2127-11-27 06:45:18.000000	37.8423611111111111	3.27	2128-02-18	0	86	0	1	180	78.7	1	58	4	2	6	2	2127-11-25 03:00:00.000000	12.5	206	1.2	32		15399	132	10.6	12.05	206.5	1.2	32.5		15399	134.5	10.1	0	0	0	0	1519.9999797344208
15822797	24266337	36887036	M	58.32734575067124445345	DIVORCED	WHITE	Other	English	2167-05-07 14:50:00.000000	2167-04-30 13:27:00.000000	2167-04-30 13:27:42.000000	2167-05-04 12:39:35.000000	7.0576388888888889	3.97		0		0	0		86	1	41	3	2	3	2	2167-05-02 03:00:00.000000	10.6	187	1.4	35			136	14.6	9.45	178.5	1.4	37			135.5	14.55	0	0	1	1	810
10350488	28817955	36891438	F	84.3471290572034736178	WIDOWED	ASIAN - SOUTH EAST ASIAN	Medicare	Vietnamese	2142-05-26 19:22:00.000000	2142-05-07 18:52:00.000000	2142-05-07 19:55:00.000000	2142-05-13 21:33:40.000000	19.0208333333333333	6.07		0		0	0		53.8	1	87	6	3	6	1	2142-05-08 21:00:00.000000	16.9	400	0.6	25	0.02	3915	109	10.8	11.2	442.5	0.8699999999999999	21.5	0.022500000000000003	3915	125.1	10.275	1	0	1	1	5789.179128546268
10094679	28902523	36938927	M	64.23677794448612153038	MARRIED	WHITE	Private	English	2138-04-14 17:53:00.000000	2138-03-28 11:33:00.000000	2138-03-28 11:35:27.000000	2138-04-12 19:50:30.000000	17.2638888888888889	15.34		0		0	0	173	84.8	1	66	8	3	5	3	2138-03-29 13:00:00.000000	19.9	224	1.1	19	0.91		140	14.4	18.419999999999998	177.4	0.8600000000000001	17.6	3.0233333333333334		141.33333333333334	13.912500000000001	1	1	1	1	6625.029994346201
12388358	25326700	36961133	F	80.06769887423194	SINGLE	WHITE	Medicare	English	2153-02-07 18:33:00.000000	2153-01-25 04:17:00.000000	2153-01-25 07:28:39.000000	2153-01-30 18:48:36.000000	13.5944444444444444	5.47	2153-09-02	0	220	0	1	157	84.5	1	30	2	2	8	3	2153-01-28 13:00:00.000000	7	194	1	41	0.52		141	6.8	6.633333333333333	177	1.0666666666666667	40.333333333333336	0.52		138.75	7.299999999999999	0	0	0	0	2037.8509696125984
14736740	22842921	36971670	F	67.96181854161837296307	WIDOWED	WHITE	Medicare	English	2127-12-31 16:37:00.000000	2127-12-18 07:07:00.000000	2127-12-18 22:14:46.000000	2127-12-25 17:58:48.000000	13.3958333333333333	6.82		0		0	0	173	159	1	75	8	2	8	3	2127-12-20 00:13:00.000000	9.4	234	0.4	14			142	9.4	9.4	234	0.4	13.5			142	9.4	1	0	0	0	599.9999856948853
13215973	24069379	36981368	F	72.07084534211411733712		UNKNOWN	Medicare	English	2188-03-19 13:58:00.000000	2188-01-26 21:01:00.000000	2188-02-21 15:01:19.000000	2188-02-27 13:45:05.000000	52.7062	5.95		0		0	0	173	95.5	1	52	6	2	5	2	2188-02-23 02:14:00.000000	10.4	350	0.3	24	0.01		132	8.8	10.424999999999999	329.25	0.4124999999999999	36.25	0.01		141.875	8.149999999999999	1	0	1	1	3339.999984525144
15344483	21475641	36989845	F	74.78086735795871108896	MARRIED	WHITE	Medicare	English	2124-10-17 17:00:00.000000	2124-10-12 04:56:00.000000	2124-10-12 04:57:29.000000	2124-10-15 16:55:43.000000	5.5027777777777778	3.5	2126-03-15	0	519	0	0	165	57.6	1	78	6	4	5	2	2124-10-14 07:23:00.000000	14.6	470	0.7	3	1.69		133	13.1	14.6	403.5	0.7	3	1.44		134.66666666666666	13.1	1	0	1	1	6209.753849526867
19784491	25590901	36994742	M	79.0841023820431994	MARRIED	WHITE	Medicare	English	2121-02-09 13:20:00.000000	2121-01-30 23:02:00.000000	2121-01-31 00:57:37.000000	2121-02-09 14:04:11.000000	9.5958333333333333	9.55	2121-03-24	0	53	0	1	175	90	1	49	6	2	5	1	2121-02-02 04:05:00.000000	9	189	1.2	37		12818	139	10.3	6.066666666666666	166	1.1666666666666667	36		13044	139.33333333333334	9.466666666666667	1	0	0	0	1792.1786761824042
19667819	23054756	37028404	F	76.75239879008681610792	MARRIED	WHITE	Medicare	English	2122-10-21 13:35:00.000000	2122-10-02 19:23:00.000000	2122-10-06 11:27:44.000000	2122-10-18 17:43:43.000000	18.7583333333333333	12.26		0		0	0	163	61	1	44	9	4	5	2	2122-10-07 18:00:00.000000	15.1	190	0.6	26			135	9.4	16.549999999999997	163.83333333333334	0.7	23.5			135.4	8.64	1	0	1	1	7062.730132594705
18042178	26556265	37031107	M	84.83400374120294063784	MARRIED	WHITE	Medicare	English	2154-12-09 12:30:00.000000	2154-11-01 14:43:00.000000	2154-11-08 17:37:40.000000	2154-11-11 23:20:18.000000	37.9076388888888889	3.24	2154-12-11	0	40	0	1	175	58.6	1	41	3	2	6	1	2154-11-10 16:00:00.000000	11.6	127	0.9	17			145	10.2	12.066666666666668	178.83333333333334	0.7749999999999999	18.375			145.75	9.716666666666667	0	0	0	0	1822.666715696454
16994095	27349791	37037703	M	75.8111253026151915	SINGLE	WHITE	Medicare	English	2141-11-04 16:24:00.000000	2141-10-23 17:01:00.000000	2141-10-23 17:02:58.000000	2141-11-02 21:13:35.000000	11.9743055555555556	10.17	2143-02-09	0	474	0	0		59.4	1	59	3	2	5	2	2141-10-26 15:00:00.000000	7.4	112	0.9	15			126	11.2	7	120	0.9	16.333333333333332			128.33333333333334	12	0	0	0	0	670
17339765	25064054	37044807	M	63.2176306698329083	MARRIED	HISPANIC OR LATINO	Medicare	English	2143-04-03 18:40:00.000000	2143-03-21 17:31:00.000000	2143-03-21 19:02:00.000000	2143-03-25 11:20:08.000000	13.0479166666666667	3.68	2144-03-08	0	353	0	1	165	76.5	1	24	5	3	6	1	2143-03-24 09:00:00.000000	1.2	16	0.9	15		2937	144	8.9	1.2	13.5	0.9	16		2937	142	8.9	0	0	0	0	1219.6666761934757
17401076	25821998	37049853	M	67.61301251407742446561		UNKNOWN	Medicare	English	2118-08-27 12:36:00.000000	2118-08-12 21:33:00.000000	2118-08-12 23:26:00.000000	2118-08-17 17:09:42.000000	14.6270833333333333	4.74		0		0	0	183	81.4	1	29	7	4	6	2	2118-08-15 18:30:00.000000	16.2	179	1	23			136	11.2	16.2	179	1.0333333333333334	22.666666666666668			139	11.2	1	0	1	1	7789.6121759191155
12706313	25259452	37069805	F	66.1271788445894929	MARRIED	WHITE	Private	English	2150-03-19 12:15:00.000000	2150-02-16 16:38:00.000000	2150-02-26 17:34:55.000000	2150-03-02 05:56:38.000000	30.8173611111111111	3.52		0		0	0		50	1	47	9	4	5	1	2150-02-28 10:20:00.000000	3.1	47	0.8	22			135	9.8	4.15	42.5	0.75	22.5			135	9.933333333333332	0	0	1	1	2584.5941795110703
15131736	26860248	37106577	F	65.1422868642951492	SINGLE	BLACK/AFRICAN AMERICAN	Medicaid	English	2130-03-05 16:25:00.000000	2130-02-21 16:41:00.000000	2130-02-21 19:00:00.000000	2130-02-27 22:36:22.000000	11.9888888888888889	6.15	2134-11-24	0	1737	0	0		136	1	32	9	3	5	2	2130-02-23 02:00:00.000000	5.8	160	1.2	29			139	12.4	5.8	160	1.15	28			139.5	12.4	1	0	1	1	1878.8199831396341
10773491	23621570	37123806	F	80.56800050073345587005		UNKNOWN	Medicare	Other	2144-08-10 17:15:00.000000	2144-07-26 10:59:00.000000	2144-07-26 22:57:36.000000	2144-08-10 17:58:51.000000	15.2611111111111111	14.79	2152-01-04	0	2718	0	0		57.9	1	41	10	3	6	3	2144-07-28 08:00:00.000000	17.4	194	0.9	23	0.07		138	11.9	15.320000000000002	156.4	0.875	26.75	0.086		138	10.538461538461538	1	0	1	1	1338.5854449383914
13356983	25984418	37124651	M	85.6588489427709725	MARRIED	ASIAN - SOUTH EAST ASIAN	Medicare	Vietnamese	2171-09-04 01:00:00.000000	2171-08-29 20:23:00.000000	2171-08-29 21:50:00.000000	2171-09-04 03:28:51.000000	5.1923611111111111	5.24	2171-09-04	1	6	1	1	157	50.5	1	80	12	4	11	2	2171-09-01 04:10:00.000000	12.7	174	0.8	12	0.03		140	11	12.5	172	0.7666666666666666	13.666666666666666	0.03		140.33333333333334	11	1	0	1	1	2349.9001272283494
19865076	22076074	37129856	M	31.28341939499473408498	SINGLE	WHITE	Private	English	2169-05-07 15:18:00.000000	2169-04-14 12:24:00.000000	2169-04-14 12:25:24.000000	2169-04-17 18:55:05.000000	23.1208333333333333	3.27		0		0	0		126	0	31	1	2	1	0		6.9	173	0.8	7	1.42	2710	135	15.2	6.26	223.6	1.0000000000000002	13.333333333333334	1.71	2710	136.11111111111111	13.466666666666667	0	0	0	0	2181.690708130598
12560723	23066122	37133847	F	66.00167697033747487967		UNABLE TO OBTAIN	Medicaid	Bengali	2169-01-15 19:33:00.000000	2169-01-01 14:42:00.000000	2169-01-10 10:35:10.000000	2169-01-14 18:17:06.000000	14.2020833333333333	4.32		0		0	0	157	55	1	94	8	4	5	2	2169-01-12 04:00:00.000000	8.3	132	0.9	25			138	10.4	11.600000000000001	146	0.7333333333333333	18			136.85714285714286	10.700000000000001	1	0	0	0
18326767	27473223	37146017	F	60.5996399495250942	DIVORCED	WHITE	Medicaid	English	2164-08-25 12:20:00.000000	2164-08-07 16:13:00.000000	2164-08-15 19:34:35.000000	2164-08-25 16:09:51.000000	17.8381944444444444	9.86	2164-08-25	1	18	1	1	165	115	1	60	10	2	5	3	2164-08-17 06:00:00.000000	8.8	207	0.8	30			142	11.3	10.200000000000001	271.6666666666667	0.825	23.75			140.75	10.4	1	0	1	1	1333.333339691162
13697731	28113079	37151963	M	21.2184206331388199848	SINGLE	ASIAN - CHINESE	Private	English	2122-06-07 11:31:00.000000	2122-03-21 18:38:00.000000	2122-03-21 21:17:00.000000	2122-06-07 15:03:37.000000	77.7034722222222222	77.74	2122-06-07	1	78	0	1	180	66	1	61	22	4	2	3	2122-03-22 22:55:00.000000	2.7	143	0.9	12			135	12.5	5	173	1	10.666666666666666			140.33333333333334	12.1	1	1	1	1	7950.255216807127
15573773	27949308	37180981	F	55.0728276655538581	MARRIED	WHITE	Medicaid	English	2174-02-04 17:00:00.000000	2174-01-27 19:26:00.000000	2174-01-27 21:38:00.000000	2174-01-31 15:33:33.000000	7.8986111111111111	3.75		0		0	0		85.1	1	51	5	3	5	2	2174-01-30 02:00:00.000000	11.4	162	0.3	6			142	7.9	11.4	162	0.3	6			142	7.9	1	0	1	1	6408.765733636916
15632290	23950907	37181561	M	65.72462800919207904166	MARRIED	WHITE	Private	English	2136-10-02 17:05:00.000000	2136-09-21 15:57:00.000000	2136-09-21 17:23:00.000000	2136-09-28 02:36:23.000000	11.0472222222222222	6.38		0		0	0	170	120	1	61	13	3	6	2	2136-09-22 22:00:00.000000	7	130	1.1	33	0.15		143	9.8	12.2	152.25	1.0666666666666667	28.666666666666668	0.415		142	9.850000000000001	1	0	1	1	5457.926456362009
18919264	22123258	37186991	F	70.94947892995146596868	MARRIED	WHITE	Medicare	English	2189-12-19 13:17:00.000000	2189-12-13 18:57:00.000000	2189-12-13 18:57:38.000000	2189-12-17 01:15:13.000000	5.7638888888888889	3.26		0		0	0	152	56.7	1	41	3	2	6	1	2189-12-14 23:00:00.000000	11	304	0.8	19	0.55		138	10.7	10.15	298	0.8333333333333334	19	0.53		137.33333333333334	10.75	0	0	0	0	696.9999911040068
15754509	29693772	37188009	F	74.97111032624336132695	MARRIED	WHITE	Medicare	English	2136-01-10 15:30:00.000000	2135-12-21 16:34:00.000000	2135-12-21 16:34:28.000000	2135-12-28 17:23:03.000000	19.9555555555555556	7.03	2137-06-21	0	548	0	0		48.9	1	45	7	3	5	2	2135-12-24 11:00:00.000000	20.5	432	0.6	10			134	12.3	14.9	309.5	0.55	8.75			130.4	10.366666666666667	1	0	1	1	11226.783850252628
19167301	22007738	37192642	F	71.81722643252053889385		UNKNOWN	Medicare	English	2132-11-28 06:28:00.000000	2132-10-25 11:39:00.000000	2132-10-25 11:49:00.000000	2132-10-28 22:02:27.000000	33.7840277777777778	3.43	2132-11-28	1	34	0	1	155	60.3	1	53	12	3	4	3	2132-10-27 22:00:00.000000	6.1	145	0.8	11			114	8.4	6.533333333333332	137.25	0.875	11.75			125.6	9.275	1	0	1	1	5756.342452146113
17779602	22463123	37199772	F	42.97983171279437864332	SINGLE	UNKNOWN	Medicaid	English	2162-01-03 14:20:00.000000	2161-12-24 21:01:00.000000	2161-12-24 21:02:02.000000	2161-12-29 19:40:00.000000	9.7215277777777778	4.94		0		0	0		81.1	1	40	4	3	3	2	2161-12-28 02:00:00.000000	29.3	230	0.9	20	0.26		126	10.5	29.3	230	0.8500000000000001	20	0.24666666666666667		127.66666666666667	10.35	1	0	0	0	1545.3586844429374
16928119	28061974	37238891	F	65.0944049120552644	MARRIED	WHITE	Medicare	English	2156-02-20 17:48:00.000000	2156-02-04 22:23:00.000000	2156-02-04 23:25:00.000000	2156-02-07 23:55:31.000000	15.8090277777777778	3.02	2157-01-17	0	348	0	1		66.6	1	46	7	1	5	2	2156-02-06 01:00:00.000000	10.2	117	1.5	46			139	8.6	8.86	102.2	1.5	47.5			139.5	7.640000000000001	0	0	1	1	1059.2274656742811
16571922	29072327	37239112	M	81.0177631847134533	WIDOWED	WHITE	Medicare	English	2185-01-28 15:54:00.000000	2185-01-06 17:31:00.000000	2185-01-07 18:11:12.000000	2185-01-21 17:56:11.000000	21.9326388888888889	13.99	2185-03-29	0	82	0	1	145	75.1	1	38	6	2	6	3	2185-01-09 17:45:00.000000	4.5	145	1.9	58			142	10	4.7	146	1.85	57			143	10	0	1	0	0	1980
10549546	23971053	37241749	M	55.7985413324133953	MARRIED	WHITE	Private	English	2197-10-29 13:53:00.000000	2197-10-18 20:54:00.000000	2197-10-18 23:35:39.000000	2197-10-24 01:21:18.000000	10.7076388888888889	5.07	2200-01-15	0	819	0	0		133.1	0	35	6	2	5	0		8.5	252	1.2	47	0.02		138	11.9	8.5	252	1.15	44.5	0.02		136.5	11.9	1	0	0	0	1060.9000009410083
19271620	27052063	37249539	M	69.89779706179586259095	MARRIED	WHITE	Medicare	English	2155-12-30 18:10:00.000000	2155-11-24 21:55:00.000000	2155-11-25 00:38:00.000000	2155-12-02 17:48:09.000000	35.8438	7.72	2156-12-31	0	403	0	0	170	112.8	1	27	2	2	6	3	2155-11-27 06:15:00.000000	12.9	210	0.8	31	0.06		138	13.4	20.3875	137.875	1.0250000000000001	28.5	0.08666666666666667		136	11.862499999999999	0	0	0	0	700
15682570	23065008	37250194	M	73.5242054126670354	SINGLE	HISPANIC/LATINO - DOMINICAN	Medicare	English	2155-07-16 18:13:00.000000	2155-07-11 22:42:00.000000	2155-07-12 00:17:00.000000	2155-07-16 18:43:24.000000	4.8131944444444444	4.77	2163-01-10	0	2740	0	0	170	55.8	1	31	4	2	5	1	2155-07-16 17:00:00.000000	11.2	213	1.1	13	0.18		142	9.6	11.2	213	1.1333333333333335	13	0.18		142	9.6	0	0	0	0	658.0429746210575
13607432	22397973	37252063	F	69.1023742857855583	SINGLE	BLACK/AFRICAN AMERICAN	Medicare	English	2177-03-02 13:09:00.000000	2177-02-06 14:26:00.000000	2177-02-20 22:23:25.000000	2177-02-25 00:44:42.000000	23.9465277777777778	4.1		0		0	0	130	78	1	29	4	1	3	3	2177-02-22 05:00:00.000000	6.6	290	0.4	8			144	8.3	6.6	290	0.4	8			144	8.3	0	0	0	0
13086823	23571532	37257075	F	72.22348576803568288666	MARRIED	WHITE	Medicare	English	2140-04-01 20:30:00.000000	2140-03-22 15:02:00.000000	2140-03-25 10:19:59.000000	2140-03-29 10:16:56.000000	10.2277777777777778	4		0		0	0		59.4	1	30	6	4	4	2	2140-03-29 02:00:00.000000	13.8	279	1.4	56			137	11.2	13.233333333333334	178.33333333333334	1.0499999999999998	35.5			135.14285714285714	9.536363636363637	1	0	1	1	7786.593425035477
11247436	26290780	37270178	F	76.07939941189676981289	WIDOWED	WHITE	Medicare	English	2164-02-12 12:15:00.000000	2164-01-30 00:00:00.000000	2164-01-30 13:05:55.000000	2164-02-05 01:22:19.000000	13.5104166666666667	5.51		0		0	0	165	78	1	68	11	3	6	2	2164-01-31 14:25:00.000000	24.7	49	1.8	40			141	7.6	21.85	56.5	1.4	34.5			140.5	9.35	1	0	1	1	6593.937667151913
15641930	24144238	37273365	F	88.76077793779345079579	MARRIED	WHITE	Medicare	English	2135-10-19 15:22:00.000000	2135-10-05 20:50:00.000000	2135-10-08 02:15:23.000000	2135-10-14 22:34:41.000000	13.7722222222222222	6.85	2135-12-14	0	70	0	1		67.4	1	48	4	2	6	3	2135-10-09 05:00:00.000000	11	200	0.9	23	10.94		138	12.5	10.55	199	0.9	20.5	7.006666666666667		130	11.85	0	0	0	0	2219.2832831591368
16203033	26871308	37273493	F	92.472649944724624	MARRIED	WHITE	Medicare	English	2137-06-26 18:02:00.000000	2137-06-21 20:58:00.000000	2137-06-21 20:59:49.000000	2137-06-26 18:05:40.000000	4.8777777777777778	4.88	2137-06-30	0	9	1	1		65.9	1	59	8	3	6	2	2137-06-23 04:44:00.000000	10.3	280	1	35	0.03		145	10.4	10.3	280	1	35	0.03		145	10.4	1	0	0	0	1674.8333459943533
17751289	29720920	37278580	F	57.87042936220673173159	MARRIED	WHITE	Private	English	2172-11-23 13:00:00.000000	2172-11-13 22:01:00.000000	2172-11-13 23:30:00.000000	2172-11-18 13:31:30.000000	9.6243055555555556	4.58		0		0	0	173	68.5	1	27	8	4	4	2	2172-11-15 01:00:00.000000	11.6	258	0.6	11			129	10.7	11.6	258	0.6	12			130	10.7	1	0	1	1	2170.75
11937809	26769317	37282266	F	47.1328838140191982	MARRIED	WHITE	Private	English	2127-03-03 16:05:00.000000	2127-02-19 00:27:00.000000	2127-02-28 09:01:22.000000	2127-03-03 18:25:08.000000	12.6513888888888889	3.39	2127-03-03	1	12	1	1		31.9	1	86	8	3	9	1	2127-03-02 14:00:00.000000	10.1	864	1	18	0.02		135	7.9	25.599999999999998	775.6	1.06	36.2	0.02		136.6	8.3	1	0	1	1	2405.714653071016
14519811	21026906	37283756	M	84.835124611444832	MARRIED	WHITE - RUSSIAN	Medicare	Russian	2185-11-19 19:45:00.000000	2185-11-01 06:21:00.000000	2185-11-01 06:57:00.000000	2185-11-10 18:17:14.000000	18.5583333333333333	9.47	2187-10-01	0	699	0	0	170	74.5	1	74	12	2	6	1	2185-11-02 20:00:00.000000	26	127	1.6	33	0.1		136	13.4	24.933333333333334	110.83333333333333	1.4833333333333334	33.833333333333336	0.08750000000000001		138	12.816666666666668	1	0	1	1	5521.994730219245
13000092	27136710	37287859	F	75.3182083537916109	SINGLE	BLACK/AFRICAN AMERICAN	Medicare	English	2175-05-07 18:10:00.000000	2175-04-27 15:26:00.000000	2175-04-28 10:09:52.000000	2175-05-03 18:05:35.000000	10.1138888888888889	5.33		0		0	0	165	113	1	72	11	3	6	2	2175-04-29 22:00:00.000000	3.7	72	0.7	13			137	11.3	6.3	85.66666666666667	0.6	12			134.8	8.799999999999999	1	0	0	0	10524.243850404397
10457824	25280974	37305179	M	80.67789339366471788263		UNKNOWN	Medicare	English	2150-09-16 16:37:00.000000	2150-09-05 14:17:00.000000	2150-09-05 14:19:46.000000	2150-09-09 20:20:56.000000	11.0972222222222222	4.25		0		0	0	157	76.4	0	57	4	4	5	0		17.9	294	0.6	18			150	9.1	17.25	297.25	0.7	17.75			146.5	8.55	1	0	0	0	6957.312898494303
10772865	29909262	37340978	M	23.8986859701543391	SINGLE	BLACK/AFRICAN AMERICAN	Private	English	2147-12-19 18:40:00.000000	2147-11-25 11:31:00.000000	2147-11-25 11:31:56.000000	2147-12-07 18:40:06.000000	24.2979166666666667	12.3		0		0	0	188	144.5	1	30	3	3	1	2	2147-11-26 17:00:00.000000	11.2	195	1	16	0.02	5924	140	13.3	12.9	188	1.0999999999999999	18	0.02	5924	138	13.466666666666669	0	0	0	0	2185.399978622794
18368183	20741778	37341327	F	82.85731971313996382307		WHITE	Medicare	English	2134-11-29 11:04:00.000000	2134-11-10 03:06:00.000000	2134-11-13 22:29:12.000000	2134-11-17 03:05:28.000000	19.3319444444444444	3.19		0		0	0		85	1	23	5	2	5	2	2134-11-15 05:00:00.000000	8.8	186	0.9	28	0.11	7763	135	14.2	7	217.66666666666666	0.75	19.5	0.08	7763	136.5	13.666666666666666	0	0	0	0	383.66002610325813
11072500	26685185	37347241	M	68.92484153580974319006	MARRIED	WHITE	Private	English	2172-12-20 18:07:00.000000	2172-12-03 18:59:00.000000	2172-12-03 19:45:20.000000	2172-12-20 18:07:17.000000	16.9638888888888889	16.93		0		0	0	170	94.6	1	32	5	1	6	3	2172-12-08 02:00:00.000000	8.8	199	1.2	20		2972	143	16.6	8.9	200.5	1.2	17.666666666666668		2972	143.33333333333334	16.4	1	0	0	0	509.9999988079071
16367560	25071325	37352025	F	91.46483069976739927074	MARRIED	WHITE	Medicare	English	2113-06-28 08:30:00.000000	2113-06-19 18:37:00.000000	2113-06-19 20:11:00.000000	2113-06-24 16:24:19.000000	8.5784722222222222	4.84	2113-06-28	1	9	1	1		54.3	0	41	6	3	7	0		12.3	345	1	61	0.03		147	8.3	11.45	338.5	0.95	55.5	0.03		146	8.3	1	0	0	0	2985.3833484258503
12246387	26489510	37352046	M	52.48618830498378852621		WHITE	Medicaid	English	2174-07-27 18:56:00.000000	2174-06-27 13:50:00.000000	2174-06-27 13:51:33.000000	2174-07-10 17:54:57.000000	30.2125	13.17		0		0	0	183	87.2	1	33	8	2	4	2	2174-06-29 02:00:00.000000	18.1	247	1.4	22	0.73		142	8.2	17.9	215.75	1.1666666666666667	19	0.71		140.33333333333334	8.05	1	0	1	1	2514.269126543775
18139299	28845275	37362277	M	65.00950283191235765146	MARRIED	WHITE	Private	English	2184-01-16 16:25:00.000000	2184-01-04 11:18:00.000000	2184-01-04 11:19:16.000000	2184-01-09 18:46:53.000000	12.2131944444444444	5.31		0		0	0	180	141.9	1	41	7	2	6	2	2184-01-05 23:00:00.000000	11.1	197	1.6	27	0.62	1240	137	11.6	9.2	151.5	1.4666666666666668	24.666666666666668	0.505	1240	137.33333333333334	10.75	0	0	0	0	3156.3746952340007
15012696	27206976	37372606	M	40.08711028121994	MARRIED	WHITE	Private	English	2161-02-16 16:20:00.000000	2161-02-01 01:24:00.000000	2161-02-09 17:53:26.000000	2161-02-15 18:37:15.000000	15.6222222222222222	6.03		0		0	0		83.4	1	37	4	2	3	2	2161-02-12 02:53:00.000000	10.5	167	1.2	23		8474	133	14.1	11.075	219.5	1.1999999999999997	21.2		8474	135	13.799999999999999	0	0	1	1	2157.8047223612666
14835491	25199819	37374605	F	91.86434511608437389153	WIDOWED	WHITE	Medicare	English	2164-12-03 13:45:00.000000	2164-11-11 16:41:00.000000	2164-11-11 18:46:00.000000	2164-12-03 14:06:45.000000	21.8777777777777778	21.81	2165-06-08	0	209	0	1		54.7	1	66	4	3	10	2	2164-11-13 08:00:00.000000	15.1	190	1.1	31			136	10.7	14.85	185.5	1.05	29.5			137	10.7	0	0	0	0	2367.583317503333
14282911	27859509	37386550	F	76.65157332520478051386	MARRIED	WHITE	Medicare	English	2147-09-18 17:26:00.000000	2147-08-26 23:34:00.000000	2147-08-26 23:50:22.000000	2147-08-31 19:23:56.000000	22.7444444444444444	4.81	2149-11-24	0	821	0	0	162.56	50.5	1	45	7	4	10	3	2147-08-28 01:00:00.000000	11.8	286	0.8	17			135	9.5	11.8	286	0.8	17			135	9.5	0	0	1	1	5409.406960181892
17599553	20505802	37408429	F	75.347216594294559	MARRIED	ASIAN	Medicare	English	2137-05-16 19:26:00.000000	2137-05-07 07:15:00.000000	2137-05-07 14:31:46.000000	2137-05-16 19:27:00.000000	9.5076388888888889	9.21	2137-05-21	0	14	1	1		42	0	36	4	2	5	0		6	370	0.6	15			138	9.2	6.3	345	0.6	14.5			138	8.8	0	0	1	1	4023.8864186778665
14829769	29814347	37411058	M	53.40457004457927133852	SINGLE	UNKNOWN	Medicaid	English	2142-06-07 15:28:00.000000	2142-05-28 18:23:00.000000	2142-05-28 18:24:51.000000	2142-06-02 23:47:54.000000	9.8784722222222222	5.22		0		0	0	178	86.1	1	74	9	4	2	1	2142-05-30 00:00:00.000000	11.7	258	1.1	17			134	12.8	12.35	254.5	1.2	16			136.66666666666666	13.2	0	0	1	1	6011.453054403886
15685616	24255202	37424652	F	63.78297212685166425426	MARRIED	WHITE	Medicare	English	2189-10-31 16:16:00.000000	2189-10-13 23:23:00.000000	2189-10-17 21:26:36.000000	2189-10-21 15:51:23.000000	17.7034722222222222	3.77		0		0	0		79.3	0	20	5	4	4	0		14.4	222	0.6	10	0.22		143	8	15.419999999999998	400.8	0.72	21.2	0.22666666666666668		147.4	9.36	1	0	1	1	5295.88
16884274	26626492	37469950	F	60.36979857798999628253		UNKNOWN	Medicare	English	2126-05-22 17:55:00.000000	2126-05-16 01:35:00.000000	2126-05-16 02:51:00.000000	2126-05-20 05:13:51.000000	6.6805555555555556	4.1		0		0	0	163	132	1	45	9	2	5	2	2126-05-17 08:00:00.000000	8.4	229	3.2	59		521	135	10	8.4	229	2.1	50		521	136.5	10	1	0	1	1	2805.2930999696255
18164965	29914101	37489215	M	74.63214176415150016215	SINGLE	WHITE	Medicare	English	2127-08-31 19:40:00.000000	2127-08-19 21:14:00.000000	2127-08-19 23:00:00.000000	2127-08-23 20:41:50.000000	11.9347222222222222	3.9		0		0	0	175	87.6	1	55	9	3	10	3	2127-08-21 03:00:00.000000	12.6	253	0.7	31	0.04	2696	136	7.9	13.175	273	0.7	31	0.04	2696	136	8.1	1	0	1	1	1827.5000207573175
16765720	21177482	37507582	F	81.61041720284085619945	WIDOWED	WHITE	Medicare	English	2189-08-29 14:40:00.000000	2189-08-11 22:48:00.000000	2189-08-17 03:01:36.000000	2189-08-24 14:19:42.000000	17.6611111111111111	7.47	2189-12-19	0	130	0	1	168	100	1	49	9	1	8	1	2189-08-23 01:43:00.000000	7.4	214	0.9	22		767	141	13.3	8.65	213.75	0.775	22		767	147.6	12.625	1	0	1	1	3216.5370150711387
19658135	22289381	37514128	M	61.2916989131711152	SINGLE	WHITE	Medicare	English	2136-04-26 05:00:00.000000	2136-04-16 18:01:00.000000	2136-04-19 10:57:02.000000	2136-04-22 21:42:11.000000	9.4576388888888889	3.45	2136-04-26	1	10	1	1	185	72.4	1	36	4	2	12	1	2136-04-21 09:11:00.000000	10.1	337	0.8	21	0.09		138	11	16.1	349	1.16	34.75	0.09		138	11.625	0	0	0	0	1990.0000089108944
12942362	24151752	37523661	F	81.5415560094403163	SINGLE	WHITE	Medicare	English	2137-07-26 18:00:00.000000	2137-07-17 12:36:00.000000	2137-07-17 14:01:00.000000	2137-07-21 17:56:12.000000	9.225	4.16	2137-08-08	0	22	1	1		52.9	1	40	3	3	8	2	2137-07-19 11:00:00.000000	5.5	169	0.7	32			135	14.1	5.5	169	0.7	32			135	14.1	0	0	0	0	940
17620255	22065607	37524117	F	69.3693175422809473658	MARRIED	WHITE	Medicare	English	2118-06-08 19:21:00.000000	2118-05-15 21:22:00.000000	2118-05-15 22:59:00.000000	2118-05-27 17:41:24.000000	23.9159722222222222	11.78	2119-04-19	0	339	0	1	163	66.8	1	50	9	2	5	3	2118-05-19 00:00:00.000000	8.9	291	0.6	10			139	12.2	8.9	291	0.6	10			139	12.2	1	0	0	0
17539265	23550723	37531469	F	67.43094715284660581204	MARRIED	ASIAN - KOREAN	Private	English	2182-06-20 16:00:00.000000	2182-06-07 09:36:00.000000	2182-06-07 11:17:00.000000	2182-06-17 18:39:51.000000	13.2666666666666667	10.31	2188-07-01	0	2216	0	0	152	59.2	1	99	11	2	6	2	2182-06-08 14:00:00.000000	9.8	164	0.8	27	0.42		141	11	9.8	164	0.5499999999999999	23.666666666666668	0.37		141	11	1	0	1	1	6778.096381867304
12348367	25439197	37534397	F	74.23335175338846877169	DIVORCED	WHITE	Medicare	English	2130-04-21 13:30:00.000000	2130-03-27 05:31:00.000000	2130-04-09 10:08:48.000000	2130-04-14 13:56:39.000000	25.3326388888888889	5.16		0		0	0	155	55.7	1	67	9	3	4	2	2130-04-10 14:00:00.000000	12.4	228	0.5	14			138	10	13.333333333333334	228.33333333333334	0.5	13.5			138.75	7.875	1	0	1	1	5664.587374512106
12009089	24580936	37535507	M	55.62037825453930392574	SINGLE	HISPANIC/LATINO - PUERTO RICAN		English	2147-08-24 02:34:00.000000	2147-08-15 14:07:00.000000	2147-08-15 14:08:25.000000	2147-08-24 05:36:48.000000	8.51875	8.64	2147-08-24	1	9	1	1	173	68.9	1	74	14	4	3	1	2147-08-19 05:19:00.000000	14.8	107	1.7	27	0.48		149	11	14.333333333333334	128.66666666666666	1.8199999999999998	31.4	0.48		148.66666666666666	11.2	1	0	1	1	2124.3329263608903
19666743	21595401	37556153	F	76.02162759363806888462	SINGLE	WHITE	Medicare	English	2151-01-15 15:54:00.000000	2151-01-08 21:35:00.000000	2151-01-08 23:17:00.000000	2151-01-12 18:33:03.000000	6.7631944444444444	3.8	2151-03-05	0	56	0	1		75	1	43	4	2	6	2	2151-01-10 16:00:00.000000	6	206	1.5	66			138	7	6	206	1.35	60.5			139.5	7	1	0	0	0	1749.210174526088
14856000	26973047	37583611	F	86.213707395827059	MARRIED	WHITE	Medicare	English	2130-03-29 15:45:00.000000	2130-03-20 00:33:00.000000	2130-03-20 01:53:00.000000	2130-03-24 10:12:33.000000	9.6333333333333333	4.35	2130-04-05	0	16	1	1		44	1	30	2	3	8	1	2130-03-21 04:00:00.000000	17.2	196	0.8	23		18491	140	9.3	14.3	164	0.8333333333333334	22.333333333333332		18491	138.33333333333334	8.5	0	0	0	0	1329.7500092312694
18561307	28166366	37590406	F	92.6114555554947131	WIDOWED	WHITE	Medicare	English	2156-09-02 09:45:00.000000	2156-08-11 18:45:00.000000	2156-08-19 15:35:58.000000	2156-08-25 16:06:12.000000	21.625	6.02	2156-09-02	1	22	1	1		80.7	1	45	7	3	7	1	2156-08-20 15:40:00.000000	70.7	51	0.9	33			125	7.4	81.5	56.5	1	36			128.33333333333334	7.15	0	0	0	0	1671.2499886527658
12549623	26921384	37595873	M	69.67808542768295480196	MARRIED	UNABLE TO OBTAIN	Medicaid	Spanish	2114-09-18 15:15:00.000000	2114-09-05 15:58:00.000000	2114-09-07 11:56:56.000000	2114-09-12 21:15:07.000000	12.9701388888888889	5.39		0		0	0	157	62	1	29	7	1	5	2	2114-09-08 22:05:00.000000	8.5	145	0.9	16			133	12	9	151	0.95	15			133	8.987499999999999	1	0	1	1	6261.7473845258355
14997530	28935111	37599613	M	72.82005370564052205265	MARRIED	WHITE		Russian	2184-11-03 18:44:00.000000	2184-10-26 12:26:00.000000	2184-10-27 11:19:36.000000	2184-10-31 11:47:46.000000	8.2625	4.02		0		0	0	170	84.2	1	44	11	2	5	1	2184-10-28 23:00:00.000000	19.8	165	1	14			138	12.6	16.95	165.66666666666666	0.95	13.5			137	9.844444444444445	1	0	1	1	11536.27154164575
18931949	26965347	37600454	M	77.22201794365866405774		UNKNOWN	Medicare	English	2189-03-30 15:30:00.000000	2189-03-23 02:10:00.000000	2189-03-23 02:10:37.000000	2189-03-26 15:19:54.000000	7.5555555555555556	3.55	2189-04-11	0	19	1	1	173	82	1	54	5	4	6	2	2189-03-24 08:00:00.000000	28.2	323	1.3	27	6.12		127	9.7	24.95	296.5	1.2666666666666666	27	4.975		126.33333333333333	9.2	0	0	0	0	1855.0804560035467
10350119	27993405	37610807	F	76.7955152565513641	MARRIED	WHITE	Medicare	English	2142-10-21 15:50:00.000000	2142-10-18 00:57:00.000000	2142-10-18 01:55:00.000000	2142-10-21 15:56:28.000000	3.6201388888888889	3.58	2142-10-25	0	7	1	1	155	51.6	1	26	5	2	7	3	2142-10-21 15:00:00.000000	8.2	218	0.8	11			132	13	8.2	218	0.8	11			136	13	1	0	0	0	1949.1162416562438
16820780	24508821	37618998	F	85.98049717721401153208	MARRIED	HISPANIC/LATINO - DOMINICAN	Medicare	Spanish	2182-12-30 15:15:00.000000	2182-12-25 02:51:00.000000	2182-12-25 03:14:00.000000	2182-12-28 17:14:27.000000	5.5166666666666667	3.58		0		0	0	150	62.8	1	35	1	3	6	2	2182-12-27 13:00:00.000000	12.6	236	0.6	12			133	11.4	12.6	236	0.6	12			133	11.4	0	0	0	0	2449.999998807907
14591481	22046215	37648272	M	66.3464247296617342	WIDOWED	WHITE	Medicare	English	2163-05-26 17:10:00.000000	2163-05-07 06:07:00.000000	2163-05-07 06:53:00.000000	2163-05-19 20:38:20.000000	19.4604166666666667	12.57	2163-12-11	0	218	0	1	170	114.2	1	66	12	4	7	3	2163-05-08 21:00:00.000000	16.1	172	1.1	22	0.52		138	13.4	18.533333333333335	219	1.2	23	0.9675		136.66666666666666	13.733333333333334	1	0	1	1	4859.57
19344719	24122669	37655271	F	96.7722307705880241	WIDOWED	WHITE	Medicare	English	2166-10-16 15:24:00.000000	2166-10-10 06:16:00.000000	2166-10-10 06:17:34.000000	2166-10-13 20:11:41.000000	6.3805555555555556	3.58		0		0	0		61	1	27	2	2	6	2	2166-10-12 21:00:00.000000	12	192	0.6	10			122	11	12	192	0.6	10.333333333333334			119.33333333333333	11	0	0	0	0	629.9999964237213
12810677	29314077	37657307	F	84.49764760228986687061	MARRIED	WHITE	Medicare	English	2115-07-09 13:28:00.000000	2115-07-01 18:17:00.000000	2115-07-03 12:19:51.000000	2115-07-06 16:18:39.000000	7.7993055555555556	3.17		0		0	0		73	1	41	6	2	7	1	2115-07-06 08:00:00.000000	11.7	138	0.7	16	0.36		138	11.6	11.299999999999999	140.5	0.6399999999999999	14	0.20249999999999999		139.2	11.719999999999999	1	0	0	0	1235.2763479687274
14086583	20899737	37658209	F	75.4922136099718360247	MARRIED	WHITE	Private	English	2121-07-15 15:31:00.000000	2121-06-29 18:39:00.000000	2121-06-29 18:40:20.000000	2121-07-03 22:56:18.000000	15.8694444444444444	4.18		0		0	0	155	79.1	1	34	1	3	7	2	2121-07-03 04:00:00.000000	7.7	166	0.9	17	1.68		138	9	10.420000000000002	213	0.9333333333333332	19.5	1.6899999999999997		137.42857142857142	9.2	0	0	0	0	4185.9
12051291	21697602	37667136	F	66.73710641772365232427	MARRIED	WHITE	Medicare	English	2185-10-07 20:43:00.000000	2185-09-27 05:20:00.000000	2185-09-27 06:03:00.000000	2185-10-03 11:13:51.000000	10.6409722222222222	6.22	2185-10-18	0	21	1	1		42	0	59	6	2	11	0		12.1	115	0.8	35	0.09		143	8.6	12.1	115	0.8	33.5	0.08		143	8.6	0	0	0	0	2630.836042009294
15462072	29795458	37684315	F	64.09308896567207495304	DIVORCED	UNKNOWN	Medicare	English	2166-02-12 16:15:00.000000	2166-02-04 00:00:00.000000	2166-02-04 17:02:53.000000	2166-02-08 18:59:41.000000	8.6770833333333333	4.08	2166-10-07	0	245	0	1	157	52.2	0	22	3	2	5	0		7.1	127	0.6	13			133	12.1	7.25	129.5	0.5333333333333333	12			135	12.1	0	0	1	1	1978.4323663674295
13595620	22243899	37684512	F	82.5291660506367468	MARRIED	BLACK/AFRICAN AMERICAN	Medicare	English	2175-08-01 17:30:00.000000	2175-07-13 05:48:00.000000	2175-07-24 14:35:47.000000	2175-07-28 16:58:33.000000	19.4875	4.1	2179-11-11	0	1582	0	0		74	1	46	5	2	7	2	2175-07-25 18:00:00.000000	4.5	287	0.9	21			137	9.2	6.5	272.25	0.9	19			136.2	8.249999999999998	1	0	1	1	1784.345099285245
11671127	24240358	37684823	F	59.9645716629887398857	MARRIED	WHITE	Private	English	2184-12-30 17:33:00.000000	2184-12-18 07:15:00.000000	2184-12-18 18:27:21.000000	2184-12-22 21:38:54.000000	12.4291666666666667	4.13		0		0	0	168	104.6	1	50	5	3	3	2	2184-12-20 23:43:00.000000	8.3	221	0.8	17		4258	139	11.6	7.366666666666667	197.33333333333334	0.8799999999999999	16.75		4258	139.25	11.333333333333334	0	0	1	1	4928.626137038693
17222513	25055557	37685708	M	68.07013614717548000139	SINGLE	UNABLE TO OBTAIN	Medicare	English	2150-02-04 18:23:00.000000	2150-01-26 14:48:00.000000	2150-01-26 16:33:55.000000	2150-02-02 18:35:47.000000	9.1493055555555556	7.08		0		0	0	168	70	0	82	11	4	3	0		26.1	299	1	15	0.19		140	13.9	23.35	272.6666666666667	0.9666666666666667	15.666666666666666	0.92		138.6	12.56	1	0	1	1	10600.063531095162
12284553	29916605	37713469	M	77.7007921384239004	MARRIED	WHITE	Medicare	English	2158-09-20 17:16:00.000000	2158-09-13 16:26:00.000000	2158-09-13 16:26:48.000000	2158-09-16 19:02:16.000000	7.0347222222222222	3.11	2159-02-14	0	154	0	1	178	126.5	1	57	11	3	5	2	2158-09-15 10:00:00.000000	25.9	102	3	55	0.83		131	9.2	17.4	88.33333333333333	2.65	59.25	0.708		131.25	8.833333333333334	0	0	1	1	1990.9037780240178
18890285	24751341	37713991	F	84.6726316615650263	WIDOWED	WHITE	Medicare	English	2124-09-16 16:17:00.000000	2124-09-02 21:12:00.000000	2124-09-10 09:35:07.000000	2124-09-13 19:54:44.000000	13.7951388888888889	3.43		0		0	0	157	65	0	36	5	3	6	0		6.6	210	0.9	18			140	11.9	11.025	170.75	0.7333333333333333	15.666666666666666			137.83333333333334	10.122222222222222	1	0	1	1	4920.008000046015
15649650	22285237	37719056	F	85.20206541903115681597	WIDOWED	ASIAN - CHINESE	Medicare	Chinese	2130-03-30 14:30:00.000000	2130-03-15 19:16:00.000000	2130-03-19 14:11:24.000000	2130-03-24 14:38:11.000000	14.8013888888888889	5.02	2130-12-16	0	276	0	1		53.3	0	34	2	3	12	0		4.6	236	0.4	8			133	13.6	4.6	236	0.4666666666666666	8			135.33333333333334	13.6	0	0	0	0	935.316
19446449	20823117	37722399	M	40.7950417500968916195	SINGLE	HISPANIC OR LATINO	Private	Spanish	2177-10-28 16:23:00.000000	2177-10-18 09:11:00.000000	2177-10-18 09:11:52.000000	2177-10-27 21:00:09.000000	10.3	9.49		0		0	0	165	82	1	51	9	4	3	2	2177-10-19 10:00:00.000000	22.2	332	0.8	17	9.64		142	13.7	18.533333333333335	329.6666666666667	0.65	16.75	9.37		143.8	13.633333333333333	1	0	1	1	5890.910133840516
17595396	21555937	37723556	M	77.81532510560730206883	MARRIED	OTHER	Medicare	English	2119-10-31 22:27:00.000000	2119-10-25 18:59:00.000000	2119-10-25 19:00:38.000000	2119-11-01 02:15:52.000000	6.1444444444444444	6.3	2119-10-31	1	6	1	1	168	57.6	1	60	19	2	6	3	2119-10-27 00:00:00.000000	10	148	1	30			127	10.2	10	148	1	30			127	10.2	1	1	1	1	600
11742505	24067631	37723752	F	72.33632571768246197802	MARRIED	UNKNOWN	Medicare	English	2182-05-12 21:50:00.000000	2182-05-03 20:10:00.000000	2182-05-04 11:38:53.000000	2182-05-12 20:38:03.000000	9.0694444444444444	8.37	2182-05-12	1	9	1	1	178	77	1	33	7	3	6	2	2182-05-08 02:00:00.000000	12.3	128	0.7	31		6186	140	11.6	10.833333333333334	133.33333333333334	0.7333333333333334	31.666666666666668		6186	138.33333333333334	11.566666666666668	0	0	0	0	997.0833365246654
10380034	21788577	37724831	M	70.1730901855634225	MARRIED	OTHER	Medicare	English	2120-03-09 15:15:00.000000	2120-03-04 11:05:00.000000	2120-03-04 11:06:16.000000	2120-03-09 15:19:50.000000	5.1736111111111111	5.18		0		0	0	183	101	1	41	2	1	6	2	2120-03-07 07:00:00.000000	5.9	218	1	30			134	15.9	5.75	218	1	29.666666666666668			134.33333333333334	16	0	0	0	0	1340.2499873191118
19983595	20743004	37735214	F	57.74827671333891867127	MARRIED	WHITE	Private	English	2165-10-18 14:06:00.000000	2165-10-01 07:15:00.000000	2165-10-01 10:01:46.000000	2165-10-15 17:55:14.000000	17.2854166666666667	14.33	2166-04-01	0	182	0	1	160	54.4	1	35	7	3	8	2	2165-10-02 18:00:00.000000	16.8	103	0.8	24			138	12.1	14.875	145.5	0.75	22.5			141.16666666666666	8.116666666666665	1	0	1	1	7348.412510983646
11146519	22193094	37752684	M	73.7203947428462955	MARRIED	WHITE	Medicare	English	2111-10-06 19:45:00.000000	2111-09-21 08:39:00.000000	2111-09-21 11:12:00.000000	2111-09-26 14:32:03.000000	15.4625	5.14	2112-04-17	0	209	0	1		88.7	1	44	5	3	6	3	2111-09-22 12:52:00.000000	14.5	214	0.7	29			146	7.8	13.450000000000001	201.25	0.7	29			146	7.7250000000000005	0	0	0	0	4346.916543371975
16302490	25512018	37752996	M	69.81405121657543339606	MARRIED	WHITE	Medicare	English	2164-10-31 17:00:00.000000	2164-10-24 07:49:00.000000	2164-10-24 09:01:00.000000	2164-10-28 13:40:55.000000	7.3826388888888889	4.19		0		0	0	180	96.5	1	38	7	4	4	2	2164-10-26 14:00:00.000000	11.3	216	1.2	13	0.02		139	12	11.3	216	1.15	14	0.015		139.5	12	1	0	1	1	1187.6135761588812
12317948	27505947	37778660	M	49.70015032651106815633	MARRIED	UNABLE TO OBTAIN	Private	English	2173-09-27 14:18:00.000000	2173-09-13 17:23:00.000000	2173-09-19 10:29:21.000000	2173-09-22 11:08:06.000000	13.8715277777777778	3.03		0		0	0	168	81.6	1	27	5	3	2	2	2173-09-20 21:14:00.000000	7.9	167	1.1	18	2.33		139	12.2	12.633333333333333	189.16666666666666	0.96	14.6	2.51		137.42857142857142	10.78	1	0	1	1	9604.453428411856
12400695	21668402	37788644	F	61.27379107550610280307	DIVORCED	OTHER	Medicaid	English	2121-04-23 17:50:00.000000	2121-04-11 00:00:00.000000	2121-04-11 22:23:10.000000	2121-04-17 23:30:06.000000	12.7430555555555556	6.05		0		0	0	157	68.9	1	47	6	3	4	1	2121-04-15 05:00:00.000000	21.5	198	1	26	0.21		150	10.7	20.45	187.5	0.8666666666666667	21.333333333333332	0.2		148.33333333333334	10.25	1	0	1	1	4984.258946850896
10914774	22928779	37813431	F	56.2718244190001272	SINGLE	WHITE	Private	English	2167-05-01 15:08:00.000000	2167-04-09 23:25:00.000000	2167-04-10 19:53:20.000000	2167-04-16 10:27:53.000000	21.6548611111111111	5.61	2168-02-10	0	307	0	1	150	42	1	36	3	2	5	1	2167-04-11 21:51:00.000000	8.5	250	0.4	4			124	10.2	8.35	249.5	0.5	5			126	10.2	0	0	0	0
11223798	22778427	37835362	M	61.1279137454679972	MARRIED	BLACK/CARIBBEAN ISLAND	Private	Haitian	2157-08-09 18:49:00.000000	2157-02-16 04:53:00.000000	2157-04-21 16:21:44.000000	2157-04-27 00:04:11.000000	174.5805555555555556	5.32	2157-10-08	0	234	0	1	175	88	1	74	5	3	4	2	2157-04-23 09:00:00.000000																	0	0	0	0	2270.8370923660696
13451992	29453516	37837842	M	72.01291191106779127872	WIDOWED	BLACK/AFRICAN	Medicare	English	2178-01-18 14:14:00.000000	2178-01-05 17:11:00.000000	2178-01-11 23:50:53.000000	2178-01-18 14:14:48.000000	12.8770833333333333	6.6		0		0	0		57	1	70	8	3	6	2	2178-01-14 00:00:00.000000	2.5	145	1.1	19			135	11.4	2.5666666666666664	133	0.925	17			139.66666666666666	12	0	0	0	0	1800
16436232	21397551	37843612	F	73.6705352585104913698	MARRIED	WHITE	Medicare	English	2183-09-09 06:30:00.000000	2183-09-02 21:47:00.000000	2183-09-02 22:39:00.000000	2183-09-06 12:46:54.000000	6.3631944444444444	3.59	2183-09-09	1	7	1	1	165	85	1	27	7	1	7	2	2183-09-04 00:00:00.000000	6.5	172	0.8	18			138	11.5	13.049999999999999	262	0.7	22.4			144.33333333333334	10.919999999999998	1	0	0	0	5175.65
17596566	24407025	37844017	F	58.342904536961491	MARRIED	WHITE	Medicaid	English	2136-05-21 17:24:00.000000	2136-05-05 16:41:00.000000	2136-05-05 16:42:08.000000	2136-05-19 18:26:19.000000	16.0298611111111111	14.07		0		0	0	163	65.7	1	63	9	3	4	2	2136-05-09 16:00:00.000000	9.9	238	0.5	16	0.13		129	12.7	13	258.5	0.4666666666666666	14.666666666666666	0.12666666666666668		132	13.25	1	0	1	1	1730.674689412117
11556751	27231881	37847159	F	69.45560546158437419574	MARRIED	WHITE	Medicare	English	2138-07-14 17:30:00.000000	2138-06-16 09:45:00.000000	2138-07-07 00:46:20.000000	2138-07-10 15:46:56.000000	28.3229166666666667	3.63	2139-05-10	0	328	0	1		85	0	33	1	4	9	0		13.3	417	0.8	14	0.03		133	12.2	9.100000000000001	456.75	0.8888888888888888	22	0.03		137.41666666666666	11.242857142857144	0	0	0	0	942.0833340883255
14098557	22072745	37863848	M	72.71672419321375356004	MARRIED	WHITE	Medicare	English	2147-10-04 17:04:00.000000	2147-09-19 18:40:00.000000	2147-09-19 19:20:00.000000	2147-10-02 14:44:28.000000	14.9333333333333333	12.81		0		0	0	170	77.2	1	40	9	3	4	2	2147-09-20 22:00:00.000000	13.8	292	1	27	0.02		141	11.4	13.8	292	1.05	27.5	0.015		141	11.4	1	0	1	1	1155.2000177502632
19874340	23609836	37863901	M	91.84890634154889087235	MARRIED	UNKNOWN	Medicare	English	2128-11-10 22:18:00.000000	2128-11-06 01:21:00.000000	2128-11-06 01:23:23.000000	2128-11-09 22:38:08.000000	4.8729166666666667	3.89	2128-11-10	1	4	1	1		69.2	0	43	6	2	6	0				1.1	71			150				1.1	66.5			145		1	0	0	0	3258.923978999257
15823941	28348326	37869431	M	46.27347165258467901647	MARRIED	UNKNOWN	Private	English	2126-04-14 14:51:00.000000	2126-04-10 21:12:00.000000	2126-04-10 21:45:00.000000	2126-04-14 14:53:39.000000	3.7354166666666667	3.71		0		0	0		162	1	52	2	3	2	2	2126-04-13 06:26:00.000000	13	126	0.9	18		1179	144	15.4	13	126	0.9	18		1179	144	15.4	0	0	0	0	2340.8333240151405
16634427	27254903	37873590	F	51.729382467271319	SINGLE	BLACK/AFRICAN AMERICAN	Medicaid	English	2146-10-01 15:00:00.000000	2146-09-24 14:40:00.000000	2146-09-24 14:40:33.000000	2146-09-27 16:32:24.000000	7.0138888888888889	3.08	2151-04-18	0	1667	0	0	170	75.2	1	16	2	2	4	1	2146-09-27 10:00:00.000000	7.8	275	0.7	12			140	11	7.8	270	0.6499999999999999	11			139.5	10.633333333333333	0	0	1	1	1587.8008247837424
10567490	23479235	37883727	F	41.21569793299906485137		UNKNOWN	Private	English	2146-03-31 17:03:00.000000	2146-03-20 18:46:00.000000	2146-03-20 18:47:07.000000	2146-03-24 22:57:16.000000	10.9284722222222222	4.17		0		0	0	160	57.5	0	44	6	4	2	0		13.4	89	0.6	9			126	10.2	11.9	91.5	0.6	8			128.33333333333334	10.6	1	0	0	0	4191.832465425134
13593640	28832112	37886571	F	87.0274961532353891	SINGLE	WHITE	Medicare	English	2147-01-15 15:01:00.000000	2147-01-10 18:27:00.000000	2147-01-10 20:10:00.000000	2147-01-15 15:02:30.000000	4.8569444444444444	4.79	2147-01-18	0	8	1	1		41	1	37	4	3	5	1	2147-01-13 20:00:00.000000	20.1	457	0.5	21			149	10	20.1	457	0.5	19.5			147	10	0	0	0	0	5689.333325266838
15503922	28382956	37901333	M	56.47253677774674812255	SINGLE	WHITE	Medicaid	English	2110-07-10 16:56:00.000000	2110-06-22 14:10:00.000000	2110-06-22 14:38:57.000000	2110-07-02 17:11:38.000000	18.1152777777777778	10.11		0		0	0	175	110	1	58	15	4	4	3	2110-06-25 02:00:00.000000	7.3	20	2.1	45	0.2		137	12.8	5.9	17.4	1.9499999999999997	46.5	0.185		139	12.7	1	0	1	1	9872.424236234277
13017386	20509990	37904621	F	75.16920858864351124277	MARRIED	WHITE	Medicare	English	2145-03-19 20:10:00.000000	2145-03-03 19:15:00.000000	2145-03-03 19:17:10.000000	2145-03-06 20:10:54.000000	16.0381944444444444	3.04	2145-03-19	1	16	1	1	163	65	1	27	4	3	6	1	2145-03-06 17:00:00.000000	12.6	465	1	17	0.02	15677	141	8.8	15.744444444444444	383.6666666666667	1.1	23.333333333333332	0.024	15677	141.9090909090909	9.718181818181817	1	0	0	0	1997.3518721237779
14589963	27682737	37915168	M	56.64619827402106000953	DIVORCED	ASIAN - CHINESE	Medicaid	Chinese	2155-11-11 11:20:00.000000	2155-08-25 00:27:00.000000	2155-08-25 17:43:12.000000	2155-09-09 22:30:17.000000	78.4534722222222222	15.2	2155-11-13	0	80	0	1	157	65	1	23	3	2	4	2	2155-08-31 21:00:00.000000	8.4	173	1	15	0.09		130	14.4	7.75	170.5	1	15	0.09		134.66666666666666	14.3	1	0	1	1	1429.9999690055847
14624167	27362472	37917720	M	38.13888622703121035733		UNKNOWN		Spanish	2118-03-17 16:50:00.000000	2118-02-20 17:27:00.000000	2118-02-20 17:27:43.000000	2118-03-02 13:57:31.000000	24.9743055555555556	9.85		0		0	0	155	56	1	30	6	4	2	1	2118-02-23 10:33:00.000000	17.4	341	1.4	15			130	13.9	12.299999999999999	302	1.1333333333333333	17.333333333333332			132	13.2	1	0	1	1	3188.3600147776306
10004401	28128182	37919158	M	85.1123447680654957	MARRIED	WHITE	Medicare	English	2144-02-19 14:30:00.000000	2144-02-11 18:13:00.000000	2144-02-12 18:27:59.000000	2144-02-19 14:42:24.000000	7.8451388888888889	6.84	2144-06-18	0	128	0	1		72	1	57	5	3	5	2	2144-02-14 05:00:00.000000	19.1	245	1	51			149	9.4	19.1	245	1	50.5			147.5	9.4	1	0	0	0	2537.6666527688503
10838580	22749412	37933216	M	92.062612900792108	MARRIED	WHITE	Medicare	Modern Greek (1453-)	2174-02-12 19:43:00.000000	2174-01-23 19:19:00.000000	2174-01-23 20:43:00.000000	2174-02-06 21:04:11.000000	20.0166666666666667	14.01		0		0	0	165	78.5	1	48	6	4	6	2	2174-01-26 19:00:00.000000	18.3	190	0.8	41			141	12.9	17.96666666666667	188	0.8	41			140.5	12.433333333333332	1	0	1	1	2310.902326225303
12492737	27261448	37934458	F	76.64746836039910220864	WIDOWED	PATIENT DECLINED TO ANSWER	Medicare		2156-09-22 17:10:00.000000	2156-08-24 11:35:00.000000	2156-08-24 11:36:12.000000	2156-09-22 19:14:40.000000	29.2326388888888889	29.32	2156-09-22	1	29	0	1	152	45	1	77	16	4	5	3	2156-08-26 02:52:00.000000	14.7	228	1.2	20	24.2		132	13	13.633333333333333	208	1.05	19.75	24.2		137.5	12	1	0	1	1	9324.043630309403
11953575	26931048	37941327	M	77.101795521873169	SINGLE	WHITE	Medicare	English	2166-02-22 17:20:00.000000	2166-02-06 14:24:00.000000	2166-02-14 09:32:32.000000	2166-02-19 21:46:27.000000	16.1222222222222222	5.51		0		0	0	165	57	1	45	7	3	5	1	2166-02-16 15:23:00.000000	10.2	220	0.8	23			139	13.9	16.525	158.25	0.7333333333333334	22.666666666666668			132.57142857142858	11.38	1	0	1	1	5744.488646252081
14369602	24717946	37941980	M	21.64980889382929674024		UNKNOWN	Private	English	2151-09-14 16:25:00.000000	2151-08-26 08:06:00.000000	2151-08-26 10:22:00.000000	2151-08-31 18:23:25.000000	19.3465277777777778	5.33		0		0	0		87.6	1	63	7	3	4	1	2151-08-27 15:00:00.000000	27.9	272	2.3	21	1.87	1150	133	15	24.32	239.8	1.9799999999999998	21.4	2.226	1150	134.4	14.62	0	0	0	0	15436.405584610999
15664810	29273880	37949722	F	71.38310786638265405768		UNKNOWN	Medicare	English	2180-05-29 17:30:00.000000	2180-05-19 22:15:00.000000	2180-05-19 22:16:35.000000	2180-05-24 21:56:44.000000	9.8020833333333333	4.99		0		0	0	147	61.1	1	38	7	4	7	3	2180-05-22 18:00:00.000000	15.6	87	0.8	17	4.04	17037	139	10.6	15.05	88	0.75	16.5	4.04	17037	137.5	10.3	0	0	0	0	1988.1762695163488
16665229	26422053	37988609	F	77.48415958916736483391	WIDOWED	WHITE	Medicare	English	2189-07-08 19:28:00.000000	2189-06-26 20:03:00.000000	2189-06-26 21:16:00.000000	2189-07-01 07:57:26.000000	11.9756944444444444	4.45		0		0	0		48.1	1	46	6	3	5	1	2189-06-28 16:00:00.000000	11	196	1.4	25			139	11.9	11.419999999999998	127	0.7714285714285715	16			137.22222222222223	10.200000000000001	0	0	1	1	1519.6626480221748
16785930	22776549	37988855	F	96.7564896850733365	WIDOWED	ASIAN - SOUTH EAST ASIAN	Medicaid	Vietnamese	2165-10-12 11:28:00.000000	2165-10-03 12:17:00.000000	2165-10-03 13:46:00.000000	2165-10-08 20:12:50.000000	8.9659722222222222	5.27	2165-10-13	0	10	1	1		62.3	1	71	8	3	8	2	2165-10-05 05:03:00.000000	16.1	100	1.5	57	0.14		129	10.7	14.666666666666666	96	1.4666666666666668	56.666666666666664	0.115		127.33333333333333	10.299999999999999	0	0	0	0
15592191	25829101	37995254	M	82.7689242109797522	MARRIED	WHITE - OTHER EUROPEAN	Medicare	English	2189-10-25 20:30:00.000000	2189-10-08 02:03:00.000000	2189-10-09 03:07:28.000000	2189-10-17 21:39:28.000000	17.7688	8.77	2190-03-07	0	150	0	1	180	114.8	1	63	7	2	5	3	2189-10-10 08:00:00.000000	8.6	138	0.8	20			143	11.7	8.7	135	0.9	19.666666666666668			141	11.649999999999999	1	0	0	0	2012.6700824722648
13719402	23593187	37998191	F	86.0404944605981178993	WIDOWED	WHITE	Medicare	English	2187-01-22 18:30:00.000000	2187-01-15 18:58:00.000000	2187-01-15 20:00:00.000000	2187-01-20 21:35:02.000000	6.9805555555555556	5.07	2187-03-31	0	75	0	1		80.9	1	41	4	3	6	2	2187-01-18 04:32:00.000000	14.3	242	1.8	40	0.04		131	13.1	14.3	242	1.75	40.5	0.05		137.33333333333334	13.1	0	0	0	0	1802.1285990010947
19671118	21233222	38013775	M	80.4735198398139681	MARRIED	WHITE - OTHER EUROPEAN	Medicare	English	2119-07-11 13:10:00.000000	2119-06-23 10:24:00.000000	2119-06-24 10:14:42.000000	2119-07-08 17:38:52.000000	18.1152777777777778	14.31		0		0	0	180	62.8	1	38	5	4	10	2	2119-06-26 08:00:00.000000	21.9	151	0.7	14			128	10.7	23.133333333333336	161.66666666666666	0.6499999999999999	13			131	8.81111	1	0	0	0
11667451	27472104	38021325	M	74.5376792038642264	MARRIED	WHITE	Private	English	2126-07-27 14:50:00.000000	2126-07-16 02:37:00.000000	2126-07-16 07:48:03.000000	2126-07-19 17:21:59.000000	11.5090277777777778	3.4	2126-12-13	0	150	0	1	188	103.3	1	31	2	3	6	2	2126-07-18 11:18:00.000000	9.7	173	1.1	29	0.79		137	12.1	15.883333333333333	203.66666666666666	1.1199999999999999	25.6	0.7966666666666667		139	10.74	0	0	0	0	881.0696566551924
12883917	29575966	38025120	M	75.60485962427346495991	DIVORCED	WHITE	Medicare		2112-08-20 14:15:00.000000	2112-08-08 22:05:00.000000	2112-08-12 11:16:06.000000	2112-08-15 15:47:04.000000	11.6736111111111111	3.19	2112-10-02	0	55	0	1	175	73	1	35	4	3	6	2	2112-08-13 12:00:00.000000	16.7	107	0.5	11			132	13.9	16.95	121.66666666666667	0.45	10.5			132.5	10.742857142857142	1	0	1	1	6464.490508556366
19662538	26327868	38041669	M	59.99883547529218070941	SINGLE	HISPANIC/LATINO - DOMINICAN	Medicaid	English	2145-01-18 16:00:00.000000	2144-12-30 19:36:00.000000	2144-12-30 22:08:00.000000	2145-01-07 22:08:35.000000	18.85	8		0		0	0		99.5	1	45	3	1	2	1	2145-01-03 03:00:00.000000	8.7	273	2.1	61	0.05		136	13.7	7.2	249.75	1.2857142857142858	32	0.05		135	12.149999999999999	0	0	0	0
17486140	26206492	38050535	M	59.91551742862722980015	MARRIED	OTHER	Medicare	English	2121-12-10 15:26:00.000000	2121-12-01 09:15:00.000000	2121-12-01 09:15:26.000000	2121-12-08 15:48:12.000000	9.2576388888888889	7.27		0		0	0	183	101	1	48	13	3	2	3	2121-12-03 05:00:00.000000	7	145	1.2	24	0.14		138	14.3	7.25	137	1.25	27.5	0.175		136.5	14	1	0	1	1	1512.568974211812
18483963	24564524	38056017	F	97.4255381059376766	WIDOWED	WHITE	Medicare	English	2126-06-20 16:26:00.000000	2126-06-04 21:02:00.000000	2126-06-04 23:31:33.000000	2126-06-08 18:12:23.000000	15.8083333333333333	3.78	2126-07-27	0	53	0	1		45	0	42	8	3	7	0		3.8	110	1.4	48			138	9.8	3.7	99	1.4	47.5			140	9.5	0	0	1	1	1271.6312688961625
10354217	27934121	38056861	F	69.4644591804885528	WIDOWED	WHITE	Medicare	English	2159-07-09 16:30:00.000000	2159-06-19 20:24:00.000000	2159-06-19 21:31:00.000000	2159-06-24 12:29:03.000000	19.8375	4.62		0		0	0		82	1	61	5	2	7	2	2159-06-21 08:53:00.000000	10.4	266	2	53	0.04		134	11.7	13.8	188.8	1.55	40.833333333333336	0.045		131.4	9.308333333333334	0	0	1	1	2135.381129939109
10316033	27529381	38065034	F	62.01280353543373677969	DIVORCED	WHITE	Private	English	2158-02-12 17:35:00.000000	2158-01-05 16:14:00.000000	2158-01-18 10:39:42.000000	2158-01-26 22:44:40.000000	38.0562	8.5	2158-02-12	1	38	0	1	165	92.7	1	50	5	1	4	2	2158-01-22 12:47:00.000000	7.1	246	1.5	34		13819	137	11.7	9.35	301.75	1.4	25.75		13819	133.875	10.325	0	0	1	1	1477.298037789762
13608499	25477100	38066951	F	80.6285122831802841	SINGLE	WHITE	Medicare	English	2185-08-27 22:35:00.000000	2185-08-18 12:39:00.000000	2185-08-18 14:10:00.000000	2185-08-28 00:41:49.000000	9.4138888888888889	9.44	2185-08-27	1	9	1	1	155	53.1	1	47	9	3	8	3	2185-08-20 02:25:00.000000	9.5	130	1	23	0.08		146	6.9	9.5	130	0.95	22.5	0.055		144.5	6.9	1	0	0	0
19698419	22056565	38092859	M	67.34354315464510896581	MARRIED	UNABLE TO OBTAIN	Medicare	English	2115-05-16 02:38:00.000000	2115-05-06 11:26:00.000000	2115-05-06 14:55:32.000000	2115-05-17 02:38:52.000000	9.6333333333333333	10.49	2115-05-16	1	10	1	1	170	92.9	1	52	10	3	7	3	2115-05-07 16:00:00.000000	20.1	208	1	16	2.34		142	12.7	11.1	126.66666666666667	0.875	18.25	3.5549999999999997		140.33333333333334	10.650000000000002	1	1	0	0
11327015	29886432	38099047	M	84.8482619438314566	WIDOWED	WHITE	Medicare	English	2134-11-16 15:17:00.000000	2134-11-06 18:56:00.000000	2134-11-06 20:42:00.000000	2134-11-16 15:18:50.000000	9.8479166666666667	9.78	2135-02-24	0	110	0	1	178	94	1	55	5	2	8	2	2134-11-08 12:00:00.000000	9.9	163	1.1	56	0.81		154	7.3	10.45	159.5	1.05	55.5	0.845		150.5	7.199999999999999	1	0	1	1	4143.213423781097
13108511	24540817	38109349	F	61.2644872744950228	DIVORCED	WHITE	Medicare	English	2196-04-18 16:41:00.000000	2196-04-06 18:43:00.000000	2196-04-06 19:52:00.000000	2196-04-18 16:42:04.000000	11.9152777777777778	11.87		0		0	0	163	113.4	1	63	9	4	5	2	2196-04-11 02:00:00.000000	20.7	332	2.6	37	0.26	17648	133	8.8	19.7	315.5	2.033333333333333	32.666666666666664	0.25	17648	135.33333333333334	8.7	1	0	1	1	10326.74587744847
11581908	23106560	38112478	M	52.14433733129146033467	SINGLE	UNABLE TO OBTAIN	Medicaid	English	2121-04-11 14:26:00.000000	2121-02-22 17:14:00.000000	2121-02-22 17:15:15.000000	2121-03-14 15:39:04.000000	47.8833333333333333	19.93		0		0	0	170	67	1	51	9	4	4	2	2121-02-27 03:06:00.000000	9.4	429	0.6	24			150	10.6	11.3	447.5	0.6333333333333333	26			149.66666666666666	10.5	1	0	0	0
12053896	22775357	38113963	F	66.2334392904795542	SINGLE	WHITE	Medicare	English	2198-04-02 17:29:00.000000	2198-03-26 17:54:00.000000	2198-03-26 19:00:00.000000	2198-03-30 18:22:12.000000	6.9826388888888889	3.97		0		0	0	163	128.5	1	61	4	3	4	2	2198-03-28 00:00:00.000000	4.7	166	1.3	28			141	9.9	3.45	164.5	1.2666666666666666	34			141	9.75	1	0	0	0	1644.8333373516798
18210061	20044738	38121450	F	76.80167167704334842835	WIDOWED	ASIAN	Medicaid	Other	2182-10-28 17:35:00.000000	2182-10-20 19:18:00.000000	2182-10-20 19:18:52.000000	2182-10-24 22:45:34.000000	7.9284722222222222	4.14		0		0	0	165	58	1	39	8	4	4	1	2182-10-22 14:08:00.000000	16.5	420	0.8	17	7.46		138	7.8	16.533333333333335	374.3333333333333	0.9	16.5	7.1850000000000005		139.5	8.466666666666667	1	0	1	1	3934.9373926836997
16381749	25795258	38130018	M	57.4137830382169752	SINGLE	BLACK/AFRICAN AMERICAN	Medicaid	English	2191-06-10 15:55:00.000000	2191-05-31 20:34:00.000000	2191-05-31 20:35:35.000000	2191-06-03 21:54:43.000000	9.80625	3.05	2192-05-14	0	349	0	1	180	92.5	1	45	7	3	5	1	2191-06-01 23:10:00.000000	13.2	216	1.5	37		7656	141	10.2	12.75	208.5	1.2	30.333333333333332		7656	142.33333333333334	10.399999999999999	1	0	1	1	4201.539793483913
19243783	24288993	38150916	F	91.13151858524241766038	WIDOWED	WHITE	Private	English	2186-03-12 11:35:00.000000	2186-02-18 00:52:00.000000	2186-03-08 12:19:40.000000	2186-03-12 11:46:55.000000	22.4465277777777778	3.98	2186-03-16	0	26	1	1	165	81.5	1	72	7	2	5	3	2186-03-10 01:00:00.000000	14.5	195	1.1	18			144	13.1	11.714285714285714	192.28571428571428	1.0666666666666667	25.11111111111111			146.77777777777777	11.171428571428573	0	0	0	0	599.9999935626984
19290303	21897397	38154080	F	79.51395908587852559247		NATIVE HAWAIIAN OR OTHER PACIFIC ISLANDER	Medicare	English	2116-07-10 11:55:00.000000	2116-07-06 17:16:00.000000	2116-07-06 17:16:57.000000	2116-07-10 18:21:16.000000	3.7770833333333333	4.04	2116-07-10	1	4	1	1	152	69.1	1	64	9	3	5	2	2116-07-09 08:00:00.000000	20.3	235	1.1	130	0.15		145	7.4	20.55	227	1.1	128	0.15		145.5	7.2	1	0	1	1	1949.3822482973337
18747069	21940219	38157874	F	79.6562801740581131	WIDOWED	WHITE	Medicare	English	2132-09-07 17:27:00.000000	2132-08-28 10:15:00.000000	2132-08-28 20:18:58.000000	2132-09-05 17:33:39.000000	10.3	7.89	2133-04-10	0	225	0	1		53.3	1	37	8	2	10	1	2132-08-30 20:00:00.000000	11.6	160	0.7	14			138	11.9	10.466666666666667	165.33333333333334	0.6499999999999999	12.5			135.5	11.166666666666666	1	0	1	1	4939.081607557833
12612603	26689180	38159053	M	48.0042713689371248	MARRIED	WHITE	Private	English	2156-01-15 15:50:00.000000	2156-01-02 19:15:00.000000	2156-01-06 13:15:08.000000	2156-01-11 17:48:12.000000	12.8576388888888889	5.19	2165-09-16	0	3545	0	0	178	123.8	1	56	4	3	3	2	2156-01-10 18:22:00.000000	10.9	251	1.2	30			120	15.2	9.65	249	1.0750000000000002	23			121.75	14.35	0	0	1	1	1882.5255230665207
18621664	27632584	38170196	F	83.78571384026055175594		UNKNOWN	Medicare	English	2189-10-17 15:06:00.000000	2189-10-14 23:25:00.000000	2189-10-14 03:47:00.000000	2189-10-17 15:07:02.000000	2.6534722222222222	3.47		0		0	0		106.4	1	26	2	1	9	2	2189-10-15 09:00:00.000000	7.5	243	0.7	18			134	10.2	8.299999999999999	243.33333333333334	0.6749999999999999	14			135	10.366666666666665	0	0	0	0	1387.4999852776527
10786895	24342919	38178636	M	67.80805633281799768677	SINGLE	WHITE	Medicare	English	2156-11-18 15:20:00.000000	2156-10-22 03:16:00.000000	2156-11-09 16:36:18.000000	2156-11-14 21:12:00.000000	27.5027777777777778	5.19		0		0	0		59	1	45	7	4	4	3	2156-11-11 09:00:00.000000	13	135	0.4	11	0.05		130	8.6	12.566666666666668	121.33333333333333	0.35	9.5	0.05		134	8.5	0	0	0	0
13899061	24845385	38181937	M	84.70872150823593976353	MARRIED	WHITE	Medicare	English	2133-09-30 17:10:00.000000	2133-09-16 20:31:00.000000	2133-09-16 20:32:26.000000	2133-09-20 18:24:43.000000	13.8604166666666667	3.91		0		0	0		1	1	95	10	3	7	2	2133-09-18 01:00:00.000000	10.7	128	1	18			139	11.9	9	126.5	1	17.666666666666668			139.66666666666666	11.65	1	0	0	0	1170.333529853262
19979915	29148528	38185084	M	60.69203546324537338714	SINGLE	WHITE	Private	English	2170-09-25 17:45:00.000000	2170-09-10 18:15:00.000000	2170-09-14 09:02:05.000000	2170-09-20 15:39:32.000000	14.9791666666666667	6.28		0		0	0	178	90	0	57	11	4	3	0		6.9	229	0.9	26			137	14	18.16	150.8	0.7666666666666666	21			136.33333333333334	10.859999999999998	1	0	1	1	12089.226166373119
11414430	29762090	38191304	F	66.50325271403008903077	DIVORCED	WHITE	Medicare	English	2121-07-16 14:18:00.000000	2121-07-03 19:25:00.000000	2121-07-04 01:23:57.000000	2121-07-15 17:13:02.000000	12.7868055555555556	11.66	2121-10-11	0	100	0	1	160	74.9	1	48	2	3	4	2	2121-07-07 23:32:00.000000	12.4	279	0.8	35	0.04		135	11.1	12.05	274.5	0.8666666666666667	31.333333333333332	0.04		136.33333333333334	11.2	0	0	1	1	1045.8249948248267
15296299	27794778	38205131	F	77.36663667133328344252	MARRIED	WHITE	Medicare	English	2130-05-29 06:56:00.000000	2130-05-14 21:52:00.000000	2130-05-17 18:05:43.000000	2130-05-23 00:08:04.000000	14.3777777777777778	5.25	2130-05-29	1	15	1	1		70.7	1	43	5	2	5	2	2130-05-18 22:00:00.000000	7.8	131	0.9	7			131	7.5	8.7	184.8	1.1	11			135	8.180000000000001	0	0	0	0	3909.9999524354935
10623147	21976100	38246006	F	52.62312567192893113789	SINGLE	WHITE	Medicare	English	2166-08-24 13:48:00.000000	2166-08-16 14:12:00.000000	2166-08-16 14:12:42.000000	2166-08-22 17:13:20.000000	7.9833333333333333	6.13		0		0	0	157	70	1	48	6	3	2	2	2166-08-20 08:00:00.000000	14.7	202	1.1	21			135	11.3	14.05	196	1	21			135.5	10.850000000000001	1	0	1	1	1110
15085836	29614547	38252897	F	28.942114406338811	MARRIED	UNKNOWN	Other	English	2192-12-15 14:04:00.000000	2192-12-10 19:03:00.000000	2192-12-10 19:04:24.000000	2192-12-14 14:32:45.000000	4.7923611111111111	3.81		0		0	0	173	86	1	62	8	3	1	1	2192-12-12 18:00:00.000000	8.1	211	0.7	9			141	10.6	7.55	209.5	0.7333333333333334	11.333333333333334			140	10.3	1	0	0	0	15699.757580729201
18768176	22989837	38261794	F	76.2065963571184767	SINGLE	WHITE	Medicare	Persian	2190-03-25 14:45:00.000000	2190-03-16 22:36:00.000000	2190-03-19 12:23:00.000000	2190-03-23 18:12:32.000000	8.6729166666666667	4.24	2190-06-26	0	102	0	1	157	97.5	1	57	3	2	6	1	2190-03-20 16:00:00.000000	7.2	182	0.8	27			135	9.3	7.933333333333334	223	0.9	35			139.66666666666666	10	0	0	0	0	1000
11403616	23885084	38268460	M	85.78733757344445600451	WIDOWED	WHITE	Medicare	English	2180-11-10 17:38:00.000000	2180-10-14 13:39:00.000000	2180-11-03 13:10:07.000000	2180-11-08 18:18:48.000000	27.1659722222222222	5.21		0		0	0		83.6	1	61	2	3	7	3	2180-11-05 19:00:00.000000	6.8	216	0.9	13			138	12	24.557142857142857	206.42857142857142	0.9199999999999999	20.4			138.85714285714286	9.792307692307691	0	0	0	0	3099.999966621399
15502000	20282401	38276389	M	91.72997834312592746727	WIDOWED	WHITE	Medicare	English	2173-09-28 07:00:00.000000	2173-09-24 14:51:00.000000	2173-09-24 14:52:14.000000	2173-09-28 07:34:23.000000	3.6729166666666667	3.7	2173-09-28	1	4	1	1		69	1	43	8	1	6	1	2173-09-25 21:00:00.000000	10	188	1.4	28		4253	137	10.6	9.95	188.5	1.5	30		4253	136.5	10.399999999999999	0	0	1	1	1441.3000184595585
15779963	27444196	38284335	M	55.31944193469291897184	MARRIED	BLACK/AFRICAN AMERICAN	Private	English	2164-05-10 14:30:00.000000	2164-04-26 16:10:00.000000	2164-05-02 09:59:59.000000	2164-05-06 13:14:55.000000	13.9305555555555556	4.14		0		0	0	191	79.1	1	93	11	4	2	2	2164-05-03 15:00:00.000000	17.5	354	1	11			136	10.7	27.95	306.75	0.925	10.25			136.25	8.433333333333334	1	0	1	1	7180.38
12748237	26751890	38291774	F	67.14447993080995309655	SINGLE	WHITE	Medicare	English	2154-03-15 10:09:00.000000	2154-02-22 18:29:00.000000	2154-03-01 01:19:45.000000	2154-03-04 10:36:27.000000	20.6527777777777778	3.39	2154-03-15	1	21	1	1	160	70.9	1	40	4	2	5	1	2154-03-04 05:00:00.000000	9.2	74	0.7	31			144	5.3	10.433333333333334	62.166666666666664	0.6571428571428573	38.857142857142854			144.14285714285714	6.533333333333334	0	0	0	0
15573773	28110700	38300300	F	52.3783280065758532	MARRIED	WHITE	Medicaid	English	2171-05-29 18:00:00.000000	2171-05-19 15:58:00.000000	2171-05-19 15:58:40.000000	2171-05-23 18:36:34.000000	10.0847222222222222	4.11		0		0	0	157	80	1	46	6	3	6	2	2171-05-23 18:21:00.000000	10.4	210	0.3	13			139	9.8	10.100000000000001	191.5	0.25	11			140.5	9.25	0	0	1	1	6219.012472113594
12178737	21048745	38300309	M	53.3743247247334948	MARRIED	HISPANIC/LATINO - DOMINICAN	Private	English	2128-05-24 14:50:00.000000	2128-05-16 23:04:00.000000	2128-05-19 12:35:04.000000	2128-05-24 14:59:08.000000	7.6569444444444444	5.1		0		0	0	178	107	1	46	4	3	2	2	2128-05-20 13:00:00.000000	21.2	174	0.9	22	0.42		136	14	19.2	201	0.95	20.5	0.42		136	11.314285714285715	1	0	1	1	8872.348650375381
15891213	26639223	38305540	F	52.73327144133965364821	MARRIED	OTHER		English	2163-10-07 14:15:00.000000	2163-09-25 19:43:00.000000	2163-09-25 21:08:00.000000	2163-09-29 14:09:17.000000	11.7722222222222222	3.71		0		0	0	163	71.6	1	52	4	3	2	1	2163-09-28 20:00:00.000000	13.8	175	1.2	39	0.15		131	11.8	11	189.25	0.857143	25	0.15		133	11.225000000000001	0	0	0	0
17527935	29854653	38312285	F	68.78485824314959518468	MARRIED	WHITE	Medicare	English	2175-10-23 15:02:00.000000	2175-10-14 15:55:00.000000	2175-10-14 15:56:44.000000	2175-10-20 12:31:23.000000	8.9631944444444444	5.86	2176-01-26	0	104	0	1		74	1	44	3	4	4	2	2175-10-15 23:37:00.000000	12.9	207	1.1	11			141	12.1	11.15	191.5	1	12.333333333333334			139	11.45	0	0	1	1	2560.4668980743736
18768176	27444212	38347426	F	76.2581128098326285	SINGLE	WHITE	Medicare	Persian	2190-04-09 16:30:00.000000	2190-04-04 18:11:00.000000	2190-04-04 18:12:12.000000	2190-04-09 17:05:27.000000	4.9298611111111111	4.95	2190-06-26	0	83	0	1		97.2	1	45	6	2	6	2	2190-04-07 09:18:00.000000	9.1	212	0.9	32			134	9.4	8.649999999999999	212	0.95	35			137	9	1	0	0	0	1570.1666986495256
19778755	23552723	38356052	M	48.52195986952942615216	MARRIED	WHITE	Medicare	English	2115-07-21 17:08:00.000000	2115-07-10 15:24:00.000000	2115-07-10 15:24:48.000000	2115-07-19 17:56:18.000000	11.0722222222222222	9.11		0		0	0	168	73	1	46	10	4	3	1	2115-07-11 17:00:00.000000	15.8	232	1.3	14	13.42		140	11.4	14.875	191	1.22	15	13.775		139.2	10.933333333333332	1	0	0	0
15754996	28458217	38362667	F	78.44176190032909687276	MARRIED	WHITE		English	2133-06-14 18:00:00.000000	2133-06-11 08:24:00.000000	2133-06-11 12:59:00.000000	2133-06-14 22:30:20.000000	3.4	3.4		0		0	0		94.8	1	36	3	3	4	3	2133-06-12 16:00:00.000000	15	190	1.2	31	0.01		141	12.5	13.9	177.5	1.1	28.5	0.01		142.66666666666666	12.566666666666668	0	0	0	0	2715.184631170705
13665139	23614719	38371981	F	72.24662111391594857352	WIDOWED	WHITE	Medicare	English	2129-04-15 16:50:00.000000	2129-04-01 01:50:00.000000	2129-04-01 01:51:25.000000	2129-04-05 21:43:58.000000	14.625	4.83		0		0	0		75.3	1	26	2	2	5	2	2129-04-03 14:00:00.000000	10.5	222	1	14	0.11	10996	128	9.4	17.833333333333332	138	0.9666666666666668	14.333333333333334	0.11	10996	133.45454545454547	8.863636363636362	0	0	0	0
19021878	20567785	38380180	F	89.8501898132684023	WIDOWED	WHITE	Medicare	English	2171-11-22 13:12:00.000000	2171-11-08 00:13:00.000000	2171-11-08 01:03:00.000000	2171-11-11 23:17:00.000000	14.5409722222222222	3.93	2175-02-09	0	1189	0	0	155	83.9	1	51	9	3	5	1	2171-11-09 04:00:00.000000	19.1	242	1.2	51		8418	147	11	14.314285714285713	218.28571428571428	1.1375	29.25		7618.5	147.11111111111111	11.1	1	0	1	1	3090.4316172748804
13401524	29986642	38388393	F	64.03551298408543741775	MARRIED	WHITE	Private	English	2167-01-22 14:15:00.000000	2167-01-13 23:18:00.000000	2167-01-14 00:29:00.000000	2167-01-18 11:58:19.000000	8.6229166666666667	4.48		0		0	0		54	0	36	6	2	6	0		11.6	325	1	17	0.85	28727	135	10.4	11.6	325	1	17.5	0.9199999999999999	28727	134.5	10.4	1	0	0	0	1500.1697204224765
12724083	27685536	38413909	F	52.01169125918949323706		UNKNOWN	Private	English	2182-01-17 17:00:00.000000	2182-01-05 06:29:00.000000	2182-01-05 08:38:00.000000	2182-01-15 05:50:16.000000	12.4381944444444444	9.88		0		0	0	168	58.9	1	53	4	4	5	3	2182-01-07 03:30:00.000000	18.2	344	0.9	19			143	13.3	15.866666666666667	308.6666666666667	0.8333333333333334	18.333333333333332			144.5	12.533333333333333	1	0	0	0
15945077	29888921	38426187	F	77.77518048916121974533	WIDOWED	BLACK/AFRICAN	Medicaid	Other	2123-11-21 19:00:00.000000	2123-10-11 03:05:00.000000	2123-10-11 04:37:00.000000	2123-11-06 01:17:25.000000	41.6631944444444444	25.86		0		0	0	157	70	1	26	7	1	5	3	2123-10-13 18:00:00.000000	7.2	104	0.9	11			145	11.5	8.033333333333333	117.66666666666667	0.8	9.5			145	11.199999999999998	1	0	1	1	2873.337065562606
12345974	20109974	38426368	M	78.31672493853390354888	MARRIED	UNKNOWN	Medicare	English	2111-05-09 13:15:00.000000	2111-04-26 16:21:00.000000	2111-05-01 10:32:58.000000	2111-05-05 16:39:15.000000	12.8708333333333333	4.25		0		0	0	170	75	1	23	8	2	6	1	2111-05-03 19:00:00.000000	9.3	64	0.9	12			136	10	10.575	83.8	0.9333333333333332	12.333333333333334			135.42857142857142	8.48	1	0	1	1	9069.4
14233748	24459033	38428136	F	66.0910082295513051	WIDOWED	WHITE	Medicare	English	2165-02-09 16:31:00.000000	2165-02-02 22:25:00.000000	2165-02-02 22:27:08.000000	2165-02-07 01:25:10.000000	6.7541666666666667	4.12	2165-09-04	0	214	0	1		90.9	1	43	1	3	4	1	2165-02-06 20:19:00.000000	16.6	267	0.9	21		1000	130	9.6	14.166666666666666	253	0.9666666666666667	22		1000	129	9.333333333333334	0	0	0	0	1038.3333428576589
18589693	21026348	38432085	M	77.03569551146910815295	MARRIED	WHITE	Medicare	English	2159-01-27 16:45:00.000000	2159-01-14 00:54:00.000000	2159-01-14 00:55:38.000000	2159-01-23 12:22:19.000000	13.6604166666666667	9.48		0		0	0	175	72	1	47	9	3	7	2	2159-01-15 06:00:00.000000	7.9	177	1	19	0.1		130	11.8	13.780000000000001	146.6	0.9666666666666667	16.666666666666668	0.1		131.375	9.940000000000001	1	0	1	1	4550.233225606382
15175429	20734166	38443909	M	27.69788394483048986091	SINGLE	WHITE	Medicaid	English	2141-09-25 17:25:00.000000	2141-09-12 21:31:00.000000	2141-09-16 13:26:35.000000	2141-09-19 17:54:00.000000	12.8291666666666667	3.19		0		0	0	191	77	1	52	9	3	2	1	2141-09-17 16:18:00.000000	9.7	163	1.1	20			136	8.7	18.080000000000002	155.2	1.3	24.75			135.875	8.507692307692308	1	0	1	1	9054.209040038288
19623193	21165299	38454186	F	77.0907323850427327	WIDOWED	WHITE	Medicare	English	2146-02-06 17:30:00.000000	2146-02-02 20:46:00.000000	2146-02-02 20:47:41.000000	2146-02-06 12:42:18.000000	3.8638888888888889	3.66	2146-03-05	0	31	0	1		59.9	1	38	3	4	8	1	2146-02-05 11:00:00.000000	24	423	1.6	41			139	9	24.15	409.5	1.5666666666666667	42.666666666666664			138	9.2	0	0	0	0	1229.622552588582
15103745	24079445	38465127	F	81.7593997039405837	WIDOWED	BLACK/AFRICAN AMERICAN	Medicare	English	2185-10-16 21:36:00.000000	2185-10-04 19:36:00.000000	2185-10-05 00:59:43.000000	2185-10-17 00:10:57.000000	12.0833333333333333	11.97	2185-10-16	1	12	1	1	175	96	1	22	6	0	7	3	2185-10-06 01:00:00.000000	11.8	165	0.9	14			143	11.9	11.8	165	0.9	14			143	11.9	1	0	1	1	1943.961258430034
18491974	20286133	38468696	M	71.7248495518040094	MARRIED	BLACK/AFRICAN AMERICAN	Medicare	English	2165-10-11 15:30:00.000000	2165-09-21 23:42:00.000000	2165-10-07 18:40:11.000000	2165-10-11 17:25:06.000000	19.6583333333333333	3.95		0		0	0		72.3	1	43	2	3	11	2	2165-10-09 19:00:00.000000	10.2	233	0.7	18			141	12.1	12.066666666666668	215	0.6666666666666666	21.333333333333332			142.33333333333334	10.299999999999999	1	0	0	0	1709.9999820813537
12766917	26213777	38483926	M	63.20287728562310894025	MARRIED	WHITE	Private	English	2174-03-21 14:40:00.000000	2174-03-16 02:23:00.000000	2174-03-16 02:24:24.000000	2174-03-19 13:34:26.000000	5.5118055555555556	3.47		0		0	0	183	115.4	1	23	2	3	4	2	2174-03-18 16:00:00.000000	13.3	236	1.2	24	3.89		138	14.6	13.3	236	1.1	22	7.246666666666667		137.5	14.6	0	0	0	0	1370.450609846972
10055361	22555445	38486782	M	62.53631108507053770742	MARRIED	WHITE	Private	English	2166-08-08 16:00:00.000000	2166-07-15 21:12:00.000000	2166-07-16 02:12:29.000000	2166-07-20 12:50:56.000000	23.7833333333333333	4.44	2166-10-03	0	80	0	1		93.5	0	46	6	3	6	0		11.9	219	1.8	42			119	12.5	9.6	202.25	1.55	27.166666666666668			122.14285714285714	11.440000000000001	0	0	1	1	1839.2337019741535
13720117	28073203	38487792	F	77.00469437614878172098		UNKNOWN	Medicare	English	2167-01-07 15:45:00.000000	2167-01-02 17:09:00.000000	2167-01-03 11:43:09.000000	2167-01-06 15:59:52.000000	4.9416666666666667	3.18		0		0	0	160	105	1	34	4	1	5	2	2167-01-04 12:00:00.000000	5.5	114	1.5	32		49960	142	7.4	6.35	135	1.5	32		49960	142	8.75	0	0	0	0	1096.6250256448984
18532454	25756103	38501604	F	83.3276841868618006083		UNKNOWN		Spanish	2136-05-16 04:40:00.000000	2136-04-29 16:25:00.000000	2136-04-29 16:26:01.000000	2136-05-12 22:51:34.000000	16.5104166666666667	13.27	2136-05-16	1	17	1	1	152	83	1	46	11	3	10	2	2136-05-01 00:00:00.000000	16	114	1.4	40	4.87	27637	142	9.3	14.766666666666666	102	1.4249999999999998	41	4.055	27637	143	9.299999999999999	1	0	1	1	1863.813376687467
12135384	25367415	38502165	M	72.59130506470899963434	MARRIED	WHITE	Private	English	2131-08-24 18:47:00.000000	2131-08-04 23:16:00.000000	2131-08-05 03:53:24.000000	2131-08-18 17:03:52.000000	19.8131944444444444	13.55	2132-01-02	0	151	0	1	178	72.1	1	69	11	1	6	2	2131-08-06 21:00:00.000000			1.2	35			142				1.2	35			142		1	0	1	1	780
19108308	26308014	38514196	F	97.1016065299779933	WIDOWED	WHITE - RUSSIAN	Medicare	Russian	2145-02-28 18:07:00.000000	2145-02-06 17:47:00.000000	2145-02-07 07:06:58.000000	2145-02-14 19:05:25.000000	22.0138888888888889	7.5	2146-02-26	0	385	0	0		60	1	74	5	3	6	3	2145-02-11 18:41:00.000000	26.6	142	1.6	31			136	11.2	33.86	168.6	1.5333333333333332	32.333333333333336			136.66666666666666	11.7	0	0	0	0
15311611	23085350	38531054	F	64.334120178463107261		UNKNOWN	Medicaid	English	2155-06-01 11:00:00.000000	2155-05-03 00:50:00.000000	2155-05-03 01:52:00.000000	2155-05-16 20:26:48.000000	29.4236111111111111	13.77	2155-06-01	1	29	0	1	166	63.6	1	16	10	2	5	2	2155-05-04 11:00:00.000000	7.4	84	0.6	16	0.08	13445	140	11.9	6.88	77.4	0.4333333333333333	18.833333333333332	0.08	13445	137.16666666666666	9.683333333333334	1	0	1	1	2546.335200048983
17805311	23292727	38532103	F	91.02931846100211184183	WIDOWED	WHITE	Medicare	English	2150-01-24 14:10:00.000000	2150-01-11 17:00:00.000000	2150-01-11 18:44:00.000000	2150-01-19 03:04:55.000000	12.8819444444444444	7.35		0		0	0		68.6	1	48	7	2	10	3	2150-01-14 17:18:00.000000	7.5	138	0.6	15			139	13.9	7.5	138	0.6	15			139	13.9	0	0	0	0	1899.6732256412506
16828725	25835438	38534147	F	79.02077960183476526066	SINGLE	UNABLE TO OBTAIN	Medicare	English	2165-01-14 14:40:00.000000	2165-01-08 14:09:00.000000	2165-01-08 14:09:47.000000	2165-01-11 21:49:04.000000	6.0215277777777778	3.32	2165-09-22	0	257	0	1		58.2	1	69	8	3	7	2	2165-01-10 08:00:00.000000	9.9	116	0.7	35	0.01		130	12.8	10.850000000000001	122	0.6499999999999999	31.5	0.01		133	13.15	1	0	1	1	929.6554368473589
14432295	25310293	38536639	M	55.65411349796086491209	SINGLE	WHITE	Private	English	2184-09-10 12:26:00.000000	2184-08-26 21:50:00.000000	2184-09-02 10:11:28.000000	2184-09-07 15:13:20.000000	14.6083333333333333	5.21		0		0	0	170	78	1	40	8	2	2	1	2184-09-07 08:00:00.000000	7.3	225	1.2	25			135	11.8	10.899999999999999	184.75	1.1333333333333333	19.666666666666668			135.42857142857142	9.4625	1	0	1	1	9844.181080069393
14879136	29292305	38537153	M	44.96578661088629821689	MARRIED	WHITE	Private	English	2165-12-27 02:30:00.000000	2165-12-19 17:54:00.000000	2165-12-22 23:50:36.000000	2165-12-27 15:06:07.000000	7.3583333333333333	4.64		0		0	0	175	79.3	0	43	5	3	3	0		10.9	178	1.8	33			133	9.1	10.9	178	1.7499999999999998	30.333333333333332			131.33333333333334	8.925	0	0	1	1	3369.933038458228
13884765	21745890	38550886	F	88.1125445594975386	MARRIED	WHITE	Medicare	Italian	2202-02-21 13:45:00.000000	2202-02-11 19:12:00.000000	2202-02-11 19:13:41.000000	2202-02-15 22:56:54.000000	9.7729166666666667	4.16	2202-02-28	0	17	1	1	165	87.8	0	42	3	2	8	0		10.7	304	1.3	40	0.5		137	8	10.399999999999999	272	1.2666666666666666	38	0.5		136.33333333333334	7.75	0	0	0	0	1601.989452496171
19468249	23405169	38562467	M	73.0806896523400923	MARRIED	WHITE	Medicare	English	2167-02-17 16:09:00.000000	2167-01-30 16:21:00.000000	2167-01-30 18:20:00.000000	2167-02-04 12:52:39.000000	17.9916666666666667	4.77	2167-10-03	0	246	0	1	183	68	1	63	4	3	9	1	2167-02-01 20:00:00.000000	19.6	383	1.4	40	8.04		138	10.1	19.6	370.5	1.075	34.5	7.685		140.75	10.25	0	0	1	1	5342.798664353788
13986392	25154955	38563408	F	68.0975865925118749	MARRIED	BLACK/AFRICAN AMERICAN	Private	English	2155-02-23 13:17:00.000000	2155-02-05 21:14:00.000000	2155-02-13 11:13:20.000000	2155-02-19 15:35:38.000000	17.6687	6.18		0		0	0	157	66	1	44	7	3	4	2	2155-02-15 03:53:00.000000	5.3	264	1.1	26			140	11.6	11.879999999999999	178	0.925	20			136.33333333333334	9.190000000000001	1	0	1	1	8849.249263778329
19393286	27673374	38569274	M	81.65097440722711091398	MARRIED	WHITE	Private	English	2132-08-31 15:47:00.000000	2132-08-25 18:19:00.000000	2132-08-25 19:31:00.000000	2132-08-29 21:29:01.000000	5.8944444444444444	4.08	2134-05-22	0	635	0	0	165	63.1	1	49	3	2	6	2	2132-08-27 00:00:00.000000	8.8	187	1	37	0.2		142	9.8	8.8	187	1.05	34	0.21500000000000002		142.5	9.8	0	0	0	0	1788.7500023394823
11018073	28862175	38577927	M	54.4974223330771866	MARRIED	WHITE	Private	English	2157-07-22 12:30:00.000000	2157-06-30 22:07:00.000000	2157-07-03 03:58:29.000000	2157-07-10 21:26:11.000000	21.5993055555555556	7.73		0		0	0	178	101.3	1	37	5	3	6	2	2157-07-07 04:00:00.000000	5.8	308	0.7	29	0.07	25696	142	8.3	4.366666666666666	263.6666666666667	0.75	25.75	0.07	25696	144.25	8	1	0	1	1	3181.014568693936
16672169	28905213	38586450	F	61.9774846387996026	MARRIED	WHITE	Medicare	English	2172-01-18 20:48:00.000000	2171-12-23 17:52:00.000000	2171-12-23 18:54:00.000000	2171-12-30 16:23:10.000000	26.1222222222222222	6.9	2173-11-10	0	688	0	0	155	55	1	46	4	2	6	1	2171-12-28 21:00:00.000000	10.5	264	0.9	21			138	11.5	21.71666666666667	271.6666666666667	1	18.75			137.5	8.879999999999999	0	0	1	1	3404.0342814289033
10809326	22350919	38588436	M	73.697252704295295235	SINGLE	UNABLE TO OBTAIN	Medicare	English	2115-09-29 13:55:00.000000	2115-09-12 15:59:00.000000	2115-09-12 15:59:58.000000	2115-09-29 14:11:45.000000	16.9138888888888889	16.92		0		0	0	178	57.5	1	66	8	3	6	2	2115-09-14 12:00:00.000000	22.9	193	1.1	19	0.51		142	13.5	22.35	202	1	20.666666666666668	0.5133333333333333		143.33333333333334	12.65	1	0	1	1	2105.6197109837085
19960105	27042506	38591947	F	66.436714866064448	MARRIED	WHITE	Private	English	2147-06-30 18:40:00.000000	2147-06-09 17:58:00.000000	2147-06-11 14:24:35.000000	2147-06-24 18:21:18.000000	21.0291666666666667	13.16	2147-12-29	0	203	0	1	163	60.4	1	43	10	3	8	3	2147-06-16 13:50:00.000000	7.1	242	1	22			137	8.8	8.475	334.5	1.125	49			142.5	9.65	1	0	1	1	187.0378374159336
12793258	20784786	38613519	F	66.87615045488866133808	SINGLE	WHITE	Medicare	English	2119-12-02 14:15:00.000000	2119-11-17 00:10:00.000000	2119-11-20 09:28:06.000000	2119-11-23 14:28:48.000000	15.5868055555555556	3.21		0		0	0	165	68	1	57	3	3	7	1	2119-11-21 15:00:00.000000	14.3	709	0.8	39	0.12		135	8	14.066666666666668	620.3333333333334	0.7249999999999999	37	0.16999999999999998		138.25	7.8999999999999995	1	0	1	1	3200.636920368299
17886980	26093002	38628972	F	51.1914503869276322	DIVORCED	WHITE		English	2173-03-16 17:20:00.000000	2173-03-11 09:50:00.000000	2173-03-11 10:27:32.000000	2173-03-14 18:23:31.000000	5.3125	3.33	2179-12-30	0	2485	0	0	150	51.7	1	23	2	2	3	1	2173-03-13 03:50:00.000000	10.6	372	0.3	5			144	12.2	10.6	372	0.35	4.5			139.75	12.2	0	0	0	0	2932.5809838324785
17842866	27530090	38637228	F	87.5528251740550709	WIDOWED	WHITE - RUSSIAN	Medicare	Russian	2173-07-29 15:30:00.000000	2173-07-21 15:23:00.000000	2173-07-21 16:52:00.000000	2173-07-26 11:49:23.000000	8.0048611111111111	4.79	2181-03-09	0	2788	0	0		64.7	1	15	4	1	5	2	2173-07-24 07:44:00.000000	5.7	64	0.5	12			106	13.5	5.7	64	0.5	10			110.85714285714286	13.5	0	0	0	0	3261.3333113119006
14610106	20565634	38644596	F	71.13395038236444755958	SINGLE	WHITE	Medicare	English	2191-03-05 14:30:00.000000	2191-02-18 22:11:00.000000	2191-02-19 00:04:00.000000	2191-02-22 17:27:45.000000	14.6798611111111111	3.72	2191-03-13	0	23	1	1		85.5	0	44	3	3	5	0		25.2	394	0.8	19			136	13.7	24.53333333333333	367.6666666666667	0.7799999999999999	18.4			140	12.6	0	0	0	0	2256.128388747573
16491463	27983009	38647682	F	74.1248583131184256		UNABLE TO OBTAIN	Medicare	English	2142-02-24 17:00:00.000000	2142-02-15 02:06:00.000000	2142-02-15 03:11:00.000000	2142-02-18 11:00:29.000000	9.6208333333333333	3.33		0		0	0		123	1	41	2	3	9	1	2142-02-16 12:45:00.000000	13	341	0.8	17			138	12.4	12.799999999999999	271	0.8666666666666667	15.666666666666666			139	11.633333333333333	0	0	0	0
15009741	21688347	38650305	F	63.5392809577090136281	DIVORCED	OTHER	Other	English	2128-07-26 17:29:00.000000	2128-07-15 23:14:00.000000	2128-07-15 23:15:09.000000	2128-07-22 15:40:44.000000	10.7604166666666667	6.68		0		0	0	170	83.4	1	26	2	2	4	2	2128-07-17 02:00:00.000000	8.9	183	0.9	16			143	13.7	8.9	183	0.9	15.5			144	13.7	0	0	1	1	1709.6000086218119
16382076	27044456	38652714	M	78.350995595614232	MARRIED	WHITE	Medicare	English	2182-05-18 16:20:00.000000	2182-05-09 09:48:00.000000	2182-05-09 10:52:59.000000	2182-05-12 21:58:06.000000	9.2722222222222222	3.46	2186-12-30	0	1696	0	0		100	1	73	5	3	9	2	2182-05-10 18:00:00.000000	17.3	195	1.8	43	7.36	29136	144	12	17.3	195	1.9	44	8.743333333333334	29136	144	12	0	0	0	0	1464.0000054836273
13210758	24949837	38653730	M	75.805832845072582	MARRIED	WHITE	Medicare	English	2191-12-08 17:13:00.000000	2191-10-22 01:12:00.000000	2191-11-27 23:54:31.000000	2191-12-08 18:01:48.000000	47.6673611111111111	10.76	2191-12-08	1	47	0	1		78.5	1	79	8	4	6	3	2191-12-02 03:30:00.000000	31.6	432	2.4	57	1.87	7937	136	11.6	13.199999999999998	344.3333333333333	1.4142857142857144	37.357142857142854	1.2366666666666666	7937	139.53333333333333	8.546153846153846	1	0	0	0
11581195	28782408	38658392	M	63.37227220430411739188		UNKNOWN	Private	English	2189-05-27 14:40:00.000000	2189-05-16 23:16:00.000000	2189-05-16 23:16:59.000000	2189-05-24 12:26:27.000000	10.6416666666666667	7.55		0		0	0	175	84.6	1	42	7	3	4	2	2189-05-19 00:00:00.000000	19.5	489	1	18			133	13	19.9	486.5	1.025	19.75			135	12.75	1	0	1	1	1961.6499819848686
18329161	26660266	38664506	F	69.6946386840019007	SINGLE	WHITE	Medicare	English	2197-09-27 12:30:00.000000	2197-09-11 15:32:00.000000	2197-09-19 16:47:07.000000	2197-09-23 12:02:20.000000	15.8736111111111111	3.8	2200-12-30	0	1205	0	0		41	0	47	5	3	5	0		15.5	141	2	129	0.08	11247	141	11.9	12.333333333333334	139.66666666666666	1	86.75	0.08	11247	143.25	11.733333333333334	0	0	0	0	1079.9999952316284
10701503	28294177	38664855	M	59.88097412126754316316	MARRIED	WHITE	Private	English	2186-12-01 16:38:00.000000	2186-11-18 18:27:00.000000	2186-11-21 12:46:32.000000	2186-11-28 18:56:38.000000	12.9243055555555556	7.26		0		0	0	165	67.3	1	28	9	3	4	2	2186-11-23 02:05:00.000000	19.1	414	0.6	9			137	12.1	17.933333333333334	438	0.7	8			135.5	9.450000000000001	1	0	1	1	8636.670831594616
17519144	22805130	38682023	F	91.93544903865869143685	WIDOWED	WHITE	Medicare	English	2135-12-17 14:33:00.000000	2135-12-08 15:58:00.000000	2135-12-08 16:00:02.000000	2135-12-12 00:37:20.000000	8.9409722222222222	3.36		0		0	0	160	60.2	1	44	5	3	5	2	2135-12-11 16:00:00.000000	21.4	256	1.4	37	0.06	9645	128	12.4	16.75	235.5	1.4333333333333333	36.666666666666664	0.065	9645	134	11.9	1	0	0	0	1077.96
15048775	24858019	38684696	F	73.94742929953899667131	MARRIED	WHITE	Medicare	English	2125-12-23 16:40:00.000000	2125-12-13 00:59:00.000000	2125-12-13 03:06:00.000000	2125-12-16 16:41:03.000000	10.6534722222222222	3.57		0		0	0	152	114.3	1	30	2	1	5	1	2125-12-15 04:00:00.000000	8.3	218	1.2	32			143	13.2	9.65	252.5	1.15	31.75			143.75	13.05	1	0	0	0
17451492	24275282	38691057	F	79.3043121638073752		WHITE	Medicare	English	2149-04-27 13:46:00.000000	2149-04-21 09:21:00.000000	2149-04-23 20:36:22.000000	2149-04-26 22:58:02.000000	6.1840277777777778	3.1		0		0	0		89	0	21	2	2	6	0		8.5	165	0.8	14			136	10.8	8.5	165	0.8	14			136	10.8	0	0	0	0	1726.4956573471427
18082025	25387142	38708866	M	88.14898797692123760867	SINGLE	WHITE	Medicare	English	2130-03-19 15:55:00.000000	2130-02-24 10:00:00.000000	2130-02-28 04:27:54.000000	2130-03-03 12:28:28.000000	23.2465277777777778	3.33	2130-03-20	0	24	1	1		110	0	57	4	3	7	0		18.1	153	1.5	24			140	14.8	18.52	175	1.48	45.6			143.2	15.479999999999999	0	0	0	0	1025.999742075801
12693636	28334016	38710412	F	71.81946239297050540007	MARRIED	WHITE	Medicare	English	2125-11-03 21:00:00.000000	2125-10-27 07:15:00.000000	2125-10-27 11:45:55.000000	2125-11-02 00:09:39.000000	7.5729166666666667	5.52		0		0	0	155	50	1	25	3	1	7	1	2125-10-28 21:00:00.000000	7.7	182	0.6	21	0.18		136	9.5	8.066666666666666	162	0.7	20	0.18		138.66666666666666	8.95	0	0	1	1	2271.5335251502693
10159776	23000400	38729347	F	71.8199510339872072641	MARRIED	WHITE	Medicare	English	2161-11-15 17:20:00.000000	2161-10-27 11:32:00.000000	2161-10-27 11:33:07.000000	2161-10-31 16:30:50.000000	19.2416666666666667	4.21		0		0	0	163	80.2	1	44	3	3	6	1	2161-10-30 04:24:00.000000	17.6	243	1.4	27	0.1		133	12.3	15.65	258	1.3399999999999999	26.4	0.1		136.9	10.6	0	0	0	0	1910.4697488695383
10818017	22156779	38753859	F	70.50830263831164603803		UNKNOWN	Medicare	English	2171-07-13 15:30:00.000000	2171-07-05 15:41:00.000000	2171-07-05 15:41:54.000000	2171-07-11 18:18:18.000000	7.9923611111111111	6.11		0		0	0	165	57	0	43	2	4	5	0		18.8	297	0.8	18			136	14.4	15.399999999999999	219.33333333333334	0.7	18			135	12.425	0	0	0	0
14734724	29930341	38756712	F	80.76196626711422381143	MARRIED	WHITE	Medicare	English	2185-10-12 12:18:00.000000	2185-10-06 07:15:00.000000	2185-10-06 18:35:37.000000	2185-10-10 17:19:04.000000	6.2104166666666667	3.95	2189-05-10	0	1312	0	0	160	65.3	1	37	2	1	7	1	2185-10-08 00:00:00.000000	6.7	184	0.8	19			140	8.5	6.833333333333333	180.66666666666666	0.8	17			142.33333333333334	8.5	0	0	0	0	1783.018842548132
18491974	20286133	38757132	M	71.7248495518040094	MARRIED	BLACK/AFRICAN AMERICAN	Medicare	English	2165-10-11 15:30:00.000000	2165-09-21 23:42:00.000000	2165-09-21 23:44:11.000000	2165-09-28 18:37:46.000000	19.6583333333333333	6.79		0		0	0		96.7	1	40	5	2	11	3	2165-09-23 02:00:00.000000	10.2	233	0.7	18			141	12.1	12.066666666666668	215	0.6666666666666666	21.333333333333332			142.33333333333334	10.299999999999999	1	0	0	0	759.2439474090934
13456784	26807276	38781024	F	54.27678376406753756566	SINGLE	HISPANIC/LATINO - PUERTO RICAN	Medicaid	Spanish	2178-05-01 15:26:00.000000	2178-04-12 02:14:00.000000	2178-04-12 03:46:00.000000	2178-04-16 14:24:36.000000	19.55	4.44		0		0	0	163	88.5	1	34	8	4	7	1	2178-04-15 07:02:00.000000	21.8	213	1.2	27	17.44		135	13.2	15.583333333333334	279.1666666666667	1.1199999999999999	23.6	17.44		135	9.485714285714286	1	0	1	1	4005.146267812699
15141584	22408326	38782776	M	83.83405697835651126894	MARRIED	WHITE	Medicare	English	2118-11-09 17:40:00.000000	2118-11-01 15:11:00.000000	2118-11-01 15:22:00.000000	2118-11-04 22:11:44.000000	8.1034722222222222	3.28		0		0	0		92.8	1	50	2	3	6	2	2118-11-03 08:00:00.000000	7.8	155	0.9	49	0.09		142	10.7	7.3	143	0.8333333333333334	42.666666666666664	0.18		143.33333333333334	10.45	0	0	0	0	5926.799933984876
17632072	26934131	38805668	F	61.6483163522024058326	SINGLE	WHITE	Medicaid	English	2170-10-03 20:25:00.000000	2170-08-25 19:01:00.000000	2170-09-15 17:22:21.000000	2170-09-19 19:24:49.000000	39.0583333333333333	4.09		0		0	0		70.3	1	31	3	2	5	1	2170-09-17 15:52:00.000000	15.4	438	0.7	7	9.55		131	10.5	11.825	369.25	0.95	12.875	9.55		135.875	9.125	0	0	0	0
17514453	27325263	38808516	M	91.87248469659994073944	MARRIED	WHITE	Medicare	English	2112-11-23 14:45:00.000000	2112-11-14 16:02:00.000000	2112-11-16 13:02:05.000000	2112-11-21 18:24:00.000000	8.9465277777777778	5.22		0		0	0	173	79.2	1	55	8	3	8	2	2112-11-18 06:00:00.000000	25.3	218	1.6	25			134	11.8	20.75	205.2	1.3750000000000002	21			132.57142857142858	9.562500000000002	1	0	1	1	11110.744652280584
18392720	28480479	38811229	M	76.4807259448682122	MARRIED	WHITE	Private	English	2185-07-10 18:01:00.000000	2185-06-25 13:11:00.000000	2185-06-25 13:12:04.000000	2185-07-03 19:53:14.000000	15.2013888888888889	8.28		0		0	0	175	88.5	1	36	5	1	4	2	2185-06-26 23:00:00.000000	6	241	1.1	24		4358	140	12.6	6.35	252.5	1.1	24		4358	141	13.1	1	0	0	0	764.2172339260578
15779963	27444196	38849985	M	55.31944193469291897184	MARRIED	BLACK/AFRICAN AMERICAN	Private	English	2164-05-10 14:30:00.000000	2164-04-26 16:10:00.000000	2164-04-26 18:53:32.000000	2164-05-02 08:44:57.000000	13.9305555555555556	5.58		0		0	0		76	1	36	3	3	2	1	2164-04-30 15:00:00.000000	17.5	354	1	11			136	10.7	27.95	306.75	0.925	10.25			136.25	8.433333333333334	0	0	1	1	6189.179034978151
13884857	21229015	38876402	M	55.1850429152300241	MARRIED	WHITE	Private	English	2142-04-10 16:45:00.000000	2142-03-09 01:40:00.000000	2142-03-09 03:23:00.000000	2142-03-19 22:54:38.000000	32.6284722222222222	10.81	2144-10-25	0	961	0	0		83.1	0	22	0	3	3	0		13.3	294	0.9	14	0.03	39	142	11.3	11.8	293.5	0.95	13	0.03	39	142	11	0	0	0	0	965.0000013411045
14187001	26606913	38876871	M	92.4746759986833691	WIDOWED	WHITE	Medicare	English	2172-07-01 11:00:00.000000	2172-06-22 19:46:00.000000	2172-06-22 20:49:00.000000	2172-07-01 11:56:11.000000	8.6347222222222222	8.63	2173-01-26	0	218	0	1	170	74.2	1	45	6	1	9	2	2172-06-25 05:46:00.000000	5.7	199	1.3	47			137	6.8	5.7	199	1.3	47			137	6.8	1	0	1	1	5315.645482767373
19598323	25562567	38907227	F	89.74392077338069310515	WIDOWED	WHITE	Medicare	English	2160-10-04 19:00:00.000000	2160-09-28 17:04:00.000000	2160-09-28 18:04:00.000000	2160-10-01 19:02:19.000000	6.0805555555555556	3.04		0		0	0	157	63.9	1	30	2	2	7	2	2160-10-01 02:00:00.000000	6.9	212	0.9	22	0.08		143	10.5	7.15	213.5	0.8500000000000001	22.5	0.08499999999999999		144	10.2	0	0	0	0	2589.333318710327
13593110	25834951	38920649	M	57.3372004041156274	MARRIED	WHITE	Medicare	English	2151-05-12 14:28:00.000000	2151-05-04 15:27:00.000000	2151-05-04 15:27:20.000000	2151-05-08 22:20:38.000000	7.9590277777777778	4.29		0		0	0		93	1	52	8	2	4	1	2151-05-06 17:00:00.000000	13.3	225	1.7	74			130	12	12.600000000000001	231	1.6	72.5			131.5	11.75	1	0	1	1	3136.9
11357684	28158383	38929622	M	69.9085376575287374155	SINGLE	WHITE	Medicare	English	2131-12-09 13:08:00.000000	2131-11-28 20:04:00.000000	2131-12-02 10:20:58.000000	2131-12-07 14:06:46.000000	10.7111111111111111	5.16		0		0	0	173	112	0	90	12	4	6	0		11.5	118	1.1	20			135	12.3	11.9	129.33333333333334	1	17.5			137.16666666666666	9.445454545454545	1	0	1	1	10604.233295168728
10621049	25587644	38936957	F	81.9728777236888298	SINGLE	WHITE	Medicare	English	2130-01-03 18:42:00.000000	2129-12-22 01:29:00.000000	2129-12-22 02:51:00.000000	2129-12-27 16:52:14.000000	12.7173611111111111	5.58		0		0	0	163	97	1	43	6	3	5	2	2129-12-23 21:21:00.000000	8.5	184	0.7	25		10342	142	16.5	8.533333333333333	169	0.7250000000000001	20.5		10342	141.25	16.233333333333334	1	0	0	0	767.8175289817154
15891213	26639223	38945235	F	52.73327144133965364821	MARRIED	OTHER		English	2163-10-07 14:15:00.000000	2163-09-25 19:43:00.000000	2163-09-30 19:27:58.000000	2163-10-04 21:53:28.000000	11.7722222222222222	4.1		0		0	0		67.9	1	18	1	2	2	1	2163-10-04 09:00:00.000000	13.8	175	1.2	39	0.15		131	11.8	11	189.25	0.857143	25	0.15		133	11.225000000000001	0	0	0	0
18578458	22237539	38945635	M	80.79141021569260928371	WIDOWED	WHITE	Medicare	Portuguese	2147-11-17 08:30:00.000000	2147-10-17 01:21:00.000000	2147-10-27 17:19:46.000000	2147-11-10 19:17:17.000000	31.2979166666666667	14.08	2147-11-17	1	31	0	1	160	61	1	42	10	2	7	3	2147-10-29 09:00:00.000000	10.4	151	1.2	26			136	12.9	9.68	198.6	1.3666666666666665	31			141.25	11.266666666666666	1	1	1	1	250
11639193	25749559	38946201	F	81.74970080719693305321	MARRIED	WHITE	Medicare	English	2140-10-13 15:00:00.000000	2140-09-30 19:44:00.000000	2140-10-01 05:54:19.000000	2140-10-06 01:50:16.000000	12.8027777777777778	4.83		0		0	0		65	1	60	2	2	7	2	2140-10-05 11:00:00.000000			1.9	60			140				1.8666666666666665	59			139.33333333333334		0	0	0	0	1230.5388694480062
15158950	28874971	38949425	F	25.8801462074764433	SINGLE	WHITE	Private	English	2174-12-13 10:45:00.000000	2174-11-18 04:37:00.000000	2174-11-18 07:15:00.000000	2174-12-10 18:49:00.000000	25.2555555555555556	22.48	2180-08-26	0	2108	0	0	173	68	1	75	9	4	3	3	2174-11-19 23:13:00.000000	20.5	82	0.7	24			139	11.7	20.45	94.5	0.6333333333333333	23.333333333333332			142	11.399999999999999	1	0	1	1	9699.872565418482
15770196	26789928	38953946	M	78.3806124888886455	MARRIED	WHITE	Medicare	English	2122-05-26 16:30:00.000000	2122-05-19 17:48:00.000000	2122-05-22 18:47:42.000000	2122-05-26 18:16:14.000000	6.9458333333333333	3.98	2122-05-26	1	7	1	1		97	1	41	6	1	6	2	2122-05-26 12:02:00.000000	5.1	139	0.7	50			146	10.4	5.1	139	0.6749999999999999	51			145.75	10.4	0	0	0	0	4927.506388574839
12502529	28674908	38959796	M	52.55555441475940761346	MARRIED	WHITE	Medicare	English	2119-08-05 13:30:00.000000	2119-07-22 21:53:00.000000	2119-07-27 11:10:47.000000	2119-08-01 17:01:44.000000	13.6506944444444444	5.24		0		0	0		118	1	55	8	3	2	1	2119-07-31 03:00:00.000000	14.8	273	1	29			137	12.4	26.38571428571429	217.28571428571428	1.02	27.2			135.5	11.31111111111111	1	0	1	1	11842.464101305231
14915616	20052026	38964841	M	67.18551626957834349098	MARRIED	WHITE - OTHER EUROPEAN	Medicare	English	2198-03-23 16:23:00.000000	2198-03-09 18:12:00.000000	2198-03-09 18:47:00.000000	2198-03-23 00:16:48.000000	13.9243055555555556	13.23		0		0	0		95.6	1	45	8	2	4	2	2198-03-10 20:00:00.000000	9.5	182	0.9	17			142	15.7	9.5	182	0.9	17			142	15.7	1	0	1	1	1884.5972135663033
17568722	23624717	38979341	M	64.1617849717903929	MARRIED	WHITE - OTHER EUROPEAN	Private	English	2190-03-12 14:15:00.000000	2190-02-28 19:36:00.000000	2190-03-06 02:42:15.000000	2190-03-09 14:19:12.000000	11.7770833333333333	3.48		0		0	0		88	1	51	6	2	6	3	2190-03-09 10:00:00.000000	7.1	104	0.8	22			142	11.7	7.1	104	0.8	24			141.5	11.7	0	0	0	0
18129805	29547606	38988414	M	76.95005503200617672666	MARRIED	WHITE	Medicare	English	2141-12-28 18:22:00.000000	2141-12-14 00:00:00.000000	2141-12-14 10:51:54.000000	2141-12-25 17:39:40.000000	14.7652777777777778	11.28		0		0	0	180	75.7	1	27	6	4	5	2	2141-12-16 16:15:00.000000	11.3	146	1.1	17			135	11.7	14.875	144	1.1	16.5			136.8	9.0375	1	0	0	0
11956664	26711686	39003444	M	36.82194552591919269355	SINGLE	BLACK/AFRICAN AMERICAN	Private	English	2187-11-20 14:40:00.000000	2187-10-28 05:01:00.000000	2187-10-28 17:03:39.000000	2187-11-12 18:07:38.000000	23.4020833333333333	15.04		0		0	0		77.5	1	22	6	2	4	3	2187-10-30 01:00:00.000000	10.2	278	1	14	0.09		137	12.4	8.5	405	1	14	0.08333333333333333		135	13.05	0	0	0	0	1697.514853157103
13483568	27325406	39007427	M	69.52464834578474302274	MARRIED	WHITE	Medicare	English	2131-07-26 17:35:00.000000	2131-07-11 14:58:00.000000	2131-07-19 16:29:51.000000	2131-07-24 22:51:45.000000	15.1090277777777778	5.27		0		0	0	178	84.5	1	54	7	4	6	1	2131-07-21 14:00:00.000000	21.3	141	0.7	13			134	11.7	19.633333333333333	152.66666666666666	0.8000000000000002	13			132.75	9.62857	1	0	1	1	7444.83
13000341	25442066	39008283	F	89.74950497052486966024	WIDOWED	WHITE	Medicare	English	2112-10-07 13:30:00.000000	2112-09-30 18:01:00.000000	2112-09-30 20:11:39.000000	2112-10-03 20:35:23.000000	6.8118055555555556	3.02	2113-08-12	0	316	0	1		49	1	32	5	2	7	2	2112-10-02 04:00:00.000000	5.5	273	0.9	25	0.03		135	10.8	5.5	273	0.95	25	0.03		135	10.8	0	0	0	0	958.8588663898408
15379576	24013180	39016298	M	77.57222334780775485842	MARRIED	WHITE	Private	English	2148-09-03 18:50:00.000000	2148-07-28 00:00:00.000000	2148-07-28 22:11:27.000000	2148-09-03 18:52:28.000000	37.7847222222222222	36.86	2148-12-23	0	148	0	1	170	84	1	69	10	2	7	3	2148-07-30 23:00:00.000000	15.8	100	1.6	28			132	9.7	15.8	100	1.6	28			136.5	10.6	1	0	1	1	8148.509042352438
12250544	29719448	39023943	F	87.1471924398374533	WIDOWED	WHITE	Medicare	English	2172-03-03 15:30:00.000000	2172-02-24 10:55:00.000000	2172-02-25 13:14:19.000000	2172-02-29 18:39:44.000000	8.1909722222222222	4.23	2173-01-24	0	335	0	1	160	109.1	1	21	5	2	8	3	2172-02-27 02:00:00.000000	19.1	169	0.6	14			140	8.1	18.9	162.66666666666666	0.6499999999999999	14			140.875	9.1	1	0	0	0	9842.428893212229
17789072	29224083	39047400	F	76.76657888620573634893	DIVORCED	WHITE	Medicare	English	2155-10-22 19:00:00.000000	2155-10-07 23:41:00.000000	2155-10-08 00:33:00.000000	2155-10-17 21:09:23.000000	14.8048611111111111	9.86		0		0	0		125	1	22	6	2	5	3	2155-10-09 07:00:00.000000	11.4	145	0.8	17			143	13.4	10.5	143.5	0.8500000000000001	17.5			146.6	13.2	0	0	0	0	1302.3994945175946
19284747	24503251	39061148	M	49.25462570022067560686	SINGLE	UNKNOWN	Private	English	2134-05-21 14:00:00.000000	2134-04-04 00:00:00.000000	2134-04-04 20:20:48.000000	2134-04-13 01:13:16.000000	47.5833333333333333	8.2	2136-11-12	0	953	0	0		87	1	39	8	3	2	2	2134-04-07 05:00:00.000000	14.8	325	1	17	1.03		142	11.5	22.099999999999998	240.5	1.1428571428571428	21.857142857142858	1.03		138.8	10.307692307692308	1	0	1	1	1614.0942852459848
13333021	26875217	39074292	F	74.29775349859362650882	WIDOWED	WHITE	Medicare	English	2174-04-28 13:50:00.000000	2174-04-19 18:03:00.000000	2174-04-20 08:59:39.000000	2174-04-25 21:09:16.000000	8.8243055555555556	5.51		0		0	0	163	70	1	40	6	4	7	2	2174-04-21 12:00:00.000000	4.4	241	1.1	26	0.04		131	11.2	9.65	246	1.1	26.5	0.07333333333333335		132.66666666666666	11.45	1	0	1	1	1747.6837261654437
16442524	20660259	39076631	F	50.90770107368691321249	MARRIED	PATIENT DECLINED TO ANSWER	Medicare	English	2136-12-03 19:56:00.000000	2136-11-27 12:44:00.000000	2136-11-27 13:57:00.000000	2136-12-01 20:08:45.000000	6.3	4.26		0		0	0	170	86	1	39	3	2	4	2	2136-11-30 23:56:00.000000	19.3	182	0.8	21			137	11.4	19.3	182	0.8	21			137	11.4	0	0	0	0	640
19681287	20125542	39079393	M	69.27830292427121378885	MARRIED	WHITE	Private	English	2139-04-20 13:05:00.000000	2139-04-12 15:33:00.000000	2139-04-12 15:34:29.000000	2139-04-16 10:24:48.000000	7.8972222222222222	3.78	2139-12-27	0	259	0	1	178	78.5	0	36	9	4	5	0		22.5	202	1.8	24	0.02		144	13.6	17.3	173	1.85	24.25	0.02		141.5	12.433333333333332	1	0	1	1	4981.9484771341085
11914968	25363228	39102259	M	72.42712548575099979374	MARRIED	WHITE	Medicaid	English	2155-06-12 00:45:00.000000	2155-06-06 00:06:00.000000	2155-06-06 01:39:00.000000	2155-06-11 17:14:47.000000	6.0270833333333333	5.65	2155-06-13	0	7	1	1	165	60	1	45	7	2	5	1	2155-06-08 15:38:00.000000	22.1	244	1.3	19	0.22		141	14.8	22.3	252.5	1.3599999999999999	24.4	1.108		142.2	14.7	1	0	1	1	2720.874854513444
16334734	27913245	39125175	F	77.88070603417277677084	WIDOWED	ASIAN - CHINESE	Medicare	Chinese	2188-11-30 08:48:00.000000	2188-11-17 16:06:00.000000	2188-11-17 20:07:00.000000	2188-11-30 10:38:27.000000	12.6958333333333333	12.61	2188-11-30	1	13	1	1		49.5	1	55	11	2	5	3	2188-11-23 15:10:00.000000	8	166	1.7	74	0.25		146	10.5	7.733333333333333	170.66666666666666	1.4749999999999999	65	0.19000000000000003		148.4	10.075	1	0	1	1	3346.514788063243
17588283	22785789	39139570	M	35.8869549352058209	SINGLE	WHITE	Medicaid	English	2151-12-23 00:00:00.000000	2151-11-21 03:55:00.000000	2151-11-21 05:26:00.000000	2151-12-04 18:09:55.000000	31.8368055555555556	13.53		0		0	0	175	66.2	1	48	7	4	2	3	2151-11-23 05:00:00.000000	44.9	149	1.1	35	0.05		132	8.4	34.766666666666666	144.66666666666666	1	28.5	0.045		137	8.5	1	0	0	0
15585879	24431412	39149705	F	61.2349386008302562	DIVORCED	WHITE	Medicare	English	2133-04-24 18:25:00.000000	2133-03-27 00:28:00.000000	2133-03-27 00:29:28.000000	2133-04-03 17:25:14.000000	28.7479166666666667	7.71		0		0	0	152	63.4	1	39	8	2	4	2	2133-03-28 23:00:00.000000	35.5	275	0.4	20			145	9.9	37.45	265.5	0.3666666666666667	16.666666666666668			143.66666666666666	9.8	1	0	1	1	8596.600069325417
15710163	24942933	39155699	F	91.12555412271559374028	WIDOWED	WHITE	Medicare	English	2140-02-24 17:00:00.000000	2140-02-15 20:35:00.000000	2140-02-15 22:15:00.000000	2140-02-21 18:25:18.000000	8.8506944444444444	5.84		0		0	0	160	87.5	1	104	10	1	5	2	2140-02-20 06:00:00.000000	10.6	386	1.4	65	0.09	6050	139	9.8	10.3	369.5	1.35	65	0.09	6050	140	9.55	1	0	0	0	1180.0732981022447
19717191	24315044	39157951	M	28.4565219011565543454	SINGLE	WHITE		English	2116-07-02 10:44:00.000000	2116-06-15 17:47:00.000000	2116-06-15 17:48:03.000000	2116-06-22 16:16:07.000000	16.7063	6.94		0		0	0	188	99.7	1	61	9	3	2	2	2116-06-17 18:51:00.000000	18	131	2.5	52	0.01	13898	126	14.6	14.966666666666667	114.5	2.34	54.4	0.015	13898	128.2	13.433333333333332	0	0	1	1	6548.311594121158
15385397	23463346	39161120	F	86.91645288146854231806	SINGLE	WHITE	Medicare	English	2169-12-05 18:38:00.000000	2169-12-01 17:27:00.000000	2169-12-01 17:32:03.000000	2169-12-05 22:50:02.000000	4.0493055555555556	4.22	2169-12-05	1	4	1	1	163	89.6	1	50	12	3	9	3	2169-12-03 00:00:00.000000	2.5	139	1.6	34	0.01		145	7	3.85	147.5	1.6333333333333335	33	0.01		144.66666666666666	7.325	1	0	1	1	1600.8008358795196
19843082	23323137	39164071	F	59.4162509605503566	MARRIED	WHITE	Other	English	2151-06-20 15:26:00.000000	2151-06-01 18:12:00.000000	2151-06-01 21:35:28.000000	2151-06-13 13:21:34.000000	18.8847222222222222	11.66	2156-02-04	0	1709	0	0	163	70	1	37	7	4	3	2	2151-06-04 08:00:00.000000	13.5	364	0.7	7		242	138	10.5	14.1	362.5	0.6333333333333333	6.333333333333333		242	138.33333333333334	10.6	1	0	1	1	3092.1349115408957
19760514	28913808	39168483	M	64.4716194255376496	MARRIED	WHITE	Medicare	English	2165-07-01 13:45:00.000000	2165-06-21 11:56:00.000000	2165-06-21 11:57:12.000000	2165-06-29 10:44:08.000000	10.0756944444444444	7.95	2165-09-25	0	96	0	1	180	71.2	1	53	8	2	3	1	2165-06-23 07:00:00.000000	3.8	113	1.5	29			137	10.5	5.233333333333333	106.66666666666667	1.4	28.5			135.5	9.355555555555556	1	0	1	1	259.8999962359667
13402281	22294178	39175858	M	91.90859469733613452025	MARRIED	WHITE	Private	English	2130-12-09 16:56:00.000000	2130-11-28 20:34:00.000000	2130-11-28 20:35:12.000000	2130-12-07 16:28:10.000000	10.8486111111111111	8.83	2131-04-03	0	126	0	1	178	98	1	59	3	3	8	3	2130-12-01 05:50:00.000000	13.9	394	1	22			143	11	13.9	394	1	22			143	11	1	0	0	0	2499.1519686207175
18085171	24997664	39178329	F	48.15335722616785583257	SINGLE	WHITE	Medicaid	English	2185-03-06 16:15:00.000000	2185-02-26 00:18:00.000000	2185-02-26 00:19:29.000000	2185-03-03 09:59:10.000000	8.6645833333333333	5.4		0		0	0	157	111	0	44	4	2	2	0		23.7	120	0.5	22			154	9.2	23.95	118.5	0.4666666666666666	17.333333333333332			148.8	9.05	1	0	0	0	6885.116549866274
15117669	28432017	39205396	M	87.03701883500072098317	WIDOWED	UNKNOWN	Medicare	English	2159-01-25 18:45:00.000000	2159-01-14 12:30:00.000000	2159-01-14 15:53:00.000000	2159-01-22 17:36:13.000000	11.2604166666666667	8.07	2159-02-05	0	22	1	1		59	1	54	8	4	8	2	2159-01-16 19:00:00.000000	27.1	749	1.9	72	0.9		153	9.7	25.25	674	1.875	64.5	1.1933333333333334		148	9.149999999999999	1	0	1	1	5372.4054080583155
10723529	24766931	39208819	F	66.158713416188597	DIVORCED	BLACK/AFRICAN AMERICAN	Medicare	English	2125-03-09 16:57:00.000000	2125-02-27 22:29:00.000000	2125-02-27 23:46:00.000000	2125-03-05 19:58:07.000000	9.7694444444444444	5.84	2125-09-30	0	215	0	1	163	108.3	1	36	5	3	5	2	2125-03-01 06:00:00.000000	10.9	194	1.1	22			140	13.5	10.9	194	1.1333333333333333	23			140	13.5	1	0	0	0	1861.0276410616934
18490877	26871381	39212768	F	80.438590791250124	WIDOWED	WHITE - RUSSIAN	Medicare	Russian	2178-06-17 19:50:00.000000	2178-06-10 03:04:00.000000	2178-06-11 06:12:17.000000	2178-06-15 20:32:09.000000	7.6986111111111111	4.6		0		0	0		78	1	24	1	1	5	1	2178-06-13 15:44:00.000000	8.2	219	0.5	13		555	130	10.8	7.8999999999999995	238.5	0.5666666666666668	15.333333333333334		555	130.75	11.4	0	0	0	0	749.9999988079071
19263060	27516385	39228269	M	61.62507072936117240989		UNKNOWN	Private	Spanish	2140-08-28 18:26:00.000000	2140-08-16 07:15:00.000000	2140-08-16 11:43:50.000000	2140-08-24 10:40:56.000000	12.4659722222222222	7.96		0		0	0	168	88	1	31	10	2	3	2	2140-08-17 18:00:00.000000	14.5	160	1.2	24	0.06		139	12.8	13.533333333333331	160.33333333333334	1.2666666666666666	25.666666666666668	0.06		139.33333333333334	12.766666666666666	1	0	1	1	2762.1597984060645
15071513	26839809	39237454	F	66.77389329084095841479	SINGLE	WHITE	Medicare	English	2129-10-24 14:19:00.000000	2129-10-10 15:48:00.000000	2129-10-16 14:38:10.000000	2129-10-24 14:24:03.000000	13.9381944444444444	7.99		0		0	0	155	84	1	46	6	2	6	3	2129-10-18 01:00:00.000000	15.5	220	0.7	18		8530	143	10.9	16.633333333333336	280	0.7999999999999999	21		8530	139.33333333333334	10.4	0	0	0	0	1450.0000385642052
10180991	26728001	39244010	F	47.73376008235635551224	SINGLE	BLACK/AFRICAN AMERICAN	Medicaid	English	2141-10-07 15:13:00.000000	2141-09-26 00:00:00.000000	2141-09-26 10:31:12.000000	2141-10-04 11:08:26.000000	11.6340277777777778	8.03		0		0	0	170	97.7	1	23	7	4	4	2	2141-09-28 02:00:00.000000	11.3	77	0.9	11			134	12.5	11.933333333333332	100	0.8500000000000001	10			138	9.639999999999999	1	0	0	0
11578593	22558545	39244643	M	74.51524058021804721253	MARRIED	WHITE - OTHER EUROPEAN	Medicare	English	2139-07-22 19:17:00.000000	2139-07-08 04:30:00.000000	2139-07-13 07:44:07.000000	2139-07-17 13:33:20.000000	14.6159722222222222	4.24		0		0	0	183	98.1	1	27	5	1	7	2	2139-07-15 06:27:00.000000	4.9	175	1.1	41		7702	141	7.3	5.95	148.75	1.02	34.4		7702	142	7.35	1	0	0	0	1394.4000155515969
19561287	21603777	39247062	F	62.41819495323952642662	MARRIED	UNKNOWN	Private	English	2115-06-10 22:02:00.000000	2115-06-02 17:49:00.000000	2115-06-04 07:58:30.000000	2115-06-07 17:38:17.000000	8.1756944444444444	3.4		0		0	0		70.2	1	55	6	4	3	3	2115-06-05 23:32:00.000000	33.5	330	0.7	38			139	13.4	35.3	312	0.75	40			137.5	12.3	0	0	0	0	1030
17065752	22796258	39249272	M	69.58267494184981768556	SINGLE	HISPANIC/LATINO - PUERTO RICAN	Medicare	Spanish	2138-08-14 14:31:00.000000	2138-08-01 19:37:00.000000	2138-08-01 19:38:23.000000	2138-08-09 15:18:15.000000	12.7875	7.82		0		0	0	163	67.8	1	28	8	2	3	3	2138-08-06 12:40:00.000000	5.6	141	1.2	21		1436	140	15.1	5.4	134	1.15	20.5		1436	140	15.05	0	0	0	0
14622418	21002438	39267045	M	45.750836127523365	SINGLE	BLACK/AFRICAN AMERICAN	Medicaid	English	2188-10-05 16:02:00.000000	2188-10-01 16:32:00.000000	2188-10-01 17:15:00.000000	2188-10-04 20:10:20.000000	3.9791666666666667	3.12	2189-12-14	0	439	0	0		88.5	1	30	5	2	1	1	2188-10-04 06:32:00.000000	8.4	138	1.4	29			134	12.4	8.4	138	1.3333333333333333	24			134.33333333333334	12.4	0	0	1	1	2585.2004368007183
10504317	22645492	39281483	M	63.06528015823907315028		UNKNOWN	Medicare	English	2172-02-08 23:20:00.000000	2172-01-24 20:14:00.000000	2172-01-24 21:25:00.000000	2172-01-30 18:59:51.000000	15.1291666666666667	5.9		0		0	0	178	125.5	1	21	3	1	6	2	2172-01-26 04:00:00.000000	6.5	273	1	17	0.09		137	9.7	6.5	277.5	0.9800000000000001	16	0.09		137.5	9.7	1	0	0	0	3357.540361886844
19820806	22305965	39285688	M	73.87148269731666493266	MARRIED	WHITE	Medicare	English	2111-11-21 17:00:00.000000	2111-11-15 07:15:00.000000	2111-11-15 10:47:46.000000	2111-11-19 17:54:29.000000	6.40625	4.3		0		0	0	180	70.2	1	26	9	3	4	2	2111-11-17 09:00:00.000000	17.5	139	1.2	16			136	11.8	12	129.75	1.05	14			135.5	9.408333333333333	1	0	1	1	14910.53673537448
16848073	27980518	39298563	M	72.11581932891982119617	MARRIED	WHITE	Medicare	English	2179-02-23 14:23:00.000000	2179-02-12 07:15:00.000000	2179-02-12 18:15:53.000000	2179-02-17 16:39:29.000000	11.2972222222222222	4.93	2184-03-09	0	1852	0	0	178	100	1	42	3	2	7	2	2179-02-15 05:00:00.000000	11.7	259	0.9	20			139	14.4	9.899999999999999	250.5	0.7000000000000001	15			137.33333333333334	13.34	1	0	0	0	8510.536927312613
14367208	21036742	39300189	M	84.63022142396913096887	WIDOWED	WHITE	Medicare	English	2135-10-15 15:50:00.000000	2135-08-19 04:24:00.000000	2135-09-14 03:04:24.000000	2135-10-15 15:52:32.000000	57.4763888888888889	31.53		0		0	0	185	109.4	1	46	13	3	5	2	2135-09-15 23:54:00.000000	11.2	376	1.5	23	0.03		140	9.3	11.433333333333332	394.6666666666667	1.5	23.666666666666668	0.042499999999999996		141.2	8.6	1	0	1	1	1620
14851458	23443034	39304013	F	90.0206010292110741	WIDOWED	WHITE - RUSSIAN	Medicare	Russian	2183-01-18 15:42:00.000000	2183-01-08 11:49:00.000000	2183-01-13 10:39:56.000000	2183-01-16 17:50:11.000000	10.1618055555555556	3.3	2183-01-20	0	12	1	1		62.1	0	44	7	3	8	0		10.3	245	0.7	17			126	10.3	13.949999999999998	145.33333333333334	0.65	16.25			131.625	10.06	1	0	1	1	4857.789122445509
17910433	25100189	39308627	M	74.20553343932090078481		UNKNOWN	Private	English	2122-04-05 17:30:00.000000	2122-03-17 01:40:00.000000	2122-03-22 10:58:37.000000	2122-04-03 18:14:12.000000	19.6597222222222222	12.3		0		0	0	175	125.4	1	38	8	2	6	2	2122-03-24 11:51:00.000000	8.7	197	0.8	25	0.81	12582	138	9.3	8.725	214	0.9	23.8	1.0075	12582	139	8.825	1	0	1	1	4376.008545517921
14929191	24548397	39312671	F	84.4281552444072089	SINGLE	WHITE - RUSSIAN	Medicare	Russian	2190-06-18 16:50:00.000000	2190-06-06 14:10:00.000000	2190-06-09 16:26:07.000000	2190-06-15 17:56:39.000000	12.1111111111111111	6.06	2191-05-08	0	336	0	1		71	0	37	4	2	6	0		4.8	52	0.9	24			145	7.7	4.8	52	0.9333333333333332	26.333333333333332			145.33333333333334	7.7	0	0	0	0	1439.699998214841
15671242	27394475	39313275	M	51.75439518334571477419	SINGLE	WHITE - RUSSIAN	Medicaid	English	2141-10-12 16:55:00.000000	2141-10-03 12:53:00.000000	2141-10-05 01:56:41.000000	2141-10-11 20:57:43.000000	9.1680555555555556	6.79	2141-12-08	0	66	0	1	173	82.1	1	39	5	2	3	2	2141-10-10 15:12:00.000000	11.7	214	1.1	20	1.42		136	12.8	12.35	224.5	1.1	20	1.17		136.5	12.466666666666667	0	0	1	1	2337.814498208463
11700176	23657444	39317893	M	56.7393195622506599886		OTHER	Medicaid	English	2172-10-04 17:30:00.000000	2172-09-27 00:44:00.000000	2172-09-27 00:46:02.000000	2172-10-01 17:41:32.000000	7.6986111111111111	4.71	2173-04-08	0	193	0	1		103	1	44	2	3	4	1	2172-09-29 06:00:00.000000	13.2	211	0.7	34		5571	138	13.6	13.2	211	0.8000000000000002	37.666666666666664		5571	138.66666666666666	13.6	0	0	0	0	1794.1000189185143
11327070	24492361	39319403	F	88.26686644288809428635	WIDOWED	ASIAN - CHINESE	Medicaid	Chinese	2182-04-11 15:10:00.000000	2182-04-08 11:18:00.000000	2182-04-08 15:00:21.000000	2182-04-11 15:29:04.000000	3.1611111111111111	3.02		0		0	0		45.5	0	19	2	3	11	0		10.9	281	1.3	26			131	10.7	14.5	278	1.3	25.5			134	10.399999999999999	0	0	0	0	2718.260786920786
10989664	24980905	39328224	M	60.48940915277481170779		WHITE	Medicaid	English	2187-07-07 18:51:00.000000	2187-06-28 18:04:00.000000	2187-06-30 12:22:55.000000	2187-07-04 14:03:19.000000	9.0326388888888889	4.07		0		0	0	178	81.9	1	25	6	2	4	3	2187-07-02 15:00:00.000000	8.6	116	1	13	1.01		138	11.9	8.6	116	0.95	13	0.9700000000000001		136.5	11.9	1	0	1	1	1866.3333177268505
16573748	24574095	39338193	M	73.70577635284733592157	MARRIED	HISPANIC/LATINO - DOMINICAN	Medicare	Spanish	2149-09-22 17:14:00.000000	2149-09-15 18:42:00.000000	2149-09-17 11:11:50.000000	2149-09-20 18:49:52.000000	6.9388888888888889	3.32		0		0	0	173	65.6	0	32	6	4	6	0		12.2	136	1	16			141	13.5	10.866666666666665	127	1.05	15			138.5	10.342857142857143	1	0	1	1	3218.040146103129
12115786	25210449	39343601	F	82.2162589004915462	WIDOWED	WHITE	Medicare	English	2150-04-01 15:45:00.000000	2150-03-20 11:18:00.000000	2150-03-20 11:45:00.000000	2150-03-27 14:08:07.000000	12.1854166666666667	7.1		0		0	0	157	70	1	50	4	3	8	1	2150-03-22 03:00:00.000000	14.8	230	1.1	38	0.03		141	11.8	17.9	224.5	1	32	0.03		138.5	11.9	0	0	0	0	2937.801461815834
19784491	29172721	39349048	M	78.92681131049185654078	MARRIED	WHITE	Medicare	English	2120-12-26 16:00:00.000000	2120-12-04 12:15:00.000000	2120-12-05 07:50:32.000000	2120-12-15 17:54:54.000000	22.1562	10.42	2121-03-24	0	110	0	1		74.3	1	47	7	2	7	2	2120-12-09 10:00:00.000000	4.4	137	0.9	25			141	9.2	5.15	146.5	1.16	27.4			138	8.971428571428572	1	0	1	1	4303.003098551184
11040832	22437614	39355794	F	68.9870115034841435	SINGLE	BLACK/AFRICAN AMERICAN	Medicare	English	2184-01-13 14:16:00.000000	2183-12-27 22:02:00.000000	2184-01-01 23:19:13.000000	2184-01-06 00:07:20.000000	16.6763888888888889	4.03		0		0	0	168	84.5	1	57	4	3	4	2	2184-01-04 18:24:00.000000	13.5	336	0.6	8			132	13.7	13.15	329	0.7333333333333334	10			135.33333333333334	13.149999999999999	1	0	0	0	3151.743410184048
12037237	26511131	39357253	F	86.9176367236578001	DIVORCED	BLACK/AFRICAN AMERICAN	Medicare	English	2186-12-11 16:57:00.000000	2186-12-01 20:29:00.000000	2186-12-01 21:51:00.000000	2186-12-07 22:49:23.000000	9.8527777777777778	6.04	2187-01-06	0	36	0	1		61.7	1	59	7	3	10	2	2186-12-03 00:14:00.000000	3.4	171	1	20	0.06		145	5.9	2.9333333333333336	143.33333333333334	1	20.5	0.05		143.5	7.533333333333334	0	0	1	1	3701.405081912875
13010423	26084305	39360049	M	63.36620126747015220959	MARRIED	WHITE	Private	English	2170-06-10 14:30:00.000000	2170-05-14 18:03:00.000000	2170-05-19 18:58:40.000000	2170-05-25 00:18:13.000000	26.8520833333333333	5.22		0		0	0		126.3	1	40	4	4	4	2	2170-05-24 14:52:00.000000	21.7	51	1.4	37			134	12	16.833333333333332	98	1.3400000000000003	28.8			135.3846153846154	8.35	0	0	0	0	1820.5840641073883
12852433	23900285	39373894	M	87.1690755718126612	MARRIED	WHITE	Medicare	English	2162-03-10 14:59:00.000000	2162-03-03 05:42:00.000000	2162-03-03 05:45:04.000000	2162-03-08 15:25:13.000000	7.3868055555555556	5.4	2164-01-29	0	697	0	0	168	58	1	44	5	3	8	3	2162-03-05 00:51:00.000000	10.3	250	0.9	29	0.09		140	12.6	9.100000000000001	232.5	0.95	28	0.09		138.66666666666666	11.85	0	0	0	0	596.1165915057063
13576998	29061631	39375812	M	64.2900304607782116	SINGLE	WHITE	Medicare	English	2176-05-01 06:47:00.000000	2176-04-15 21:35:00.000000	2176-04-15 22:33:00.000000	2176-04-25 13:28:51.000000	15.3833333333333333	9.62	2176-05-01	1	16	1	1		100.8	0	45	6	3	8	0		15.9	258	0.9	17			141	15.3	15.9	258	0.9	17			141	15.3	0	0	0	0	3500.0000087469816
19906838	28407805	39378465	F	73.06520980914328338776	MARRIED	UNKNOWN	Medicare	English	2150-01-29 16:50:00.000000	2150-01-24 19:37:00.000000	2150-01-24 19:40:22.000000	2150-01-28 17:43:57.000000	4.8840277777777778	3.92		0		0	0	168	70	1	38	11	3	6	2	2150-01-26 14:39:00.000000	11.6	119	0.9	17	0.09		143	15.7	13.466666666666667	102	1	21.666666666666668	0.09		141.66666666666666	14.725000000000001	1	0	1	1	1916.2123384326696
14261784	25571330	39383781	F	91.96055225789415723761	WIDOWED	WHITE	Medicare	Russian	2127-12-28 13:45:00.000000	2127-12-17 20:01:00.000000	2127-12-17 20:02:11.000000	2127-12-22 22:25:26.000000	10.7388888888888889	5.1	2134-12-04	0	2544	0	0	147	25.5	1	76	6	3	6	1	2127-12-20 00:00:00.000000	7.5	324	1.1	22	0.03		142	10.9	7.5	324	1.05	22	0.03		142	10.9	1	0	0	0	1901.900001168251
15149655	27218825	39401910	F	44.1519512329420555	SINGLE	BLACK/AFRICAN AMERICAN	Medicaid	English	2144-03-02 18:01:00.000000	2144-02-25 17:47:00.000000	2144-02-25 20:23:00.000000	2144-02-29 16:36:19.000000	6.0097222222222222	3.84	2146-06-10	0	836	0	0	155	140	1	32	7	2	2	2	2144-02-27 23:00:00.000000	9.1	205	0.7	7			128	14.4	9.1	205	0.6333333333333333	7			129.33333333333334	14.4	1	0	0	0	2264.0073605775833
16372136	22329887	39403399	F	94.0291465049960787	WIDOWED	WHITE	Medicare	English	2133-01-20 16:58:00.000000	2133-01-11 08:55:00.000000	2133-01-14 15:48:42.000000	2133-01-20 17:08:00.000000	9.3354166666666667	6.06	2133-02-01	0	21	1	1	152	60.3	1	69	4	2	6	2	2133-01-18 08:00:00.000000	22.9	354	1	34			139	11.6	23.5	328	0.975	30.25			142.5	11.066666666666668	0	0	0	0	2134.1666739434004
18631629	22866554	39417457	F	55.5949119579164864	SINGLE	WHITE	Medicaid	English	2113-08-17 18:30:00.000000	2113-08-05 18:30:00.000000	2113-08-07 00:40:50.000000	2113-08-11 21:25:03.000000	12	4.86	2113-10-15	0	71	0	1	157	78.6	0	32	4	2	8	0		5.1	43	0.6	10			141	7.6	5.1	43	0.6	12			138.5	7.6	0	0	0	0	1660.0000128149986
10937125	22425616	39430690	M	64.62940005074261266046	WIDOWED	UNKNOWN	Medicaid	English	2127-08-27 14:00:00.000000	2127-08-18 21:12:00.000000	2127-08-18 21:12:41.000000	2127-08-23 14:17:45.000000	8.7	4.71	2132-10-16	0	1886	0	0	185	92.4	0	25	5	2	3	0		5	122	1.3	24			137	14.3	5.066666666666666	117.33333333333333	1.1	20.4			137.66666666666666	14.05	0	0	1	1	1820.2356799319386
13889025	29705561	39436814	M	47.42923785995160590634		UNKNOWN	Medicaid	English	2180-06-13 18:45:00.000000	2180-06-05 18:37:00.000000	2180-06-05 19:58:05.000000	2180-06-10 14:40:18.000000	8.0055555555555556	4.78	2183-02-05	0	975	0	0	173	67.3	1	29	6	2	7	1	2180-06-06 23:29:00.000000	5.4	185	1.2	17			138	12.6	5.5	176	1.2	17.333333333333332			138	12.45	0	0	1	1	2307.428882787004
19618851	24035159	39465394	M	80.64915864002496974609	MARRIED	UNABLE TO OBTAIN	Medicare	English	2184-08-28 16:38:00.000000	2184-08-25 02:24:00.000000	2184-08-25 02:25:35.000000	2184-08-28 20:54:34.000000	3.5930555555555556	3.77	2184-08-28	1	3	1	1	175	87	1	33	13	3	7	3	2184-08-26 03:00:00.000000	11.2	261	1.3	27	0.29		140	13.1	12.799999999999999	252.33333333333334	1.2333333333333334	23	0.30666666666666664		136.33333333333334	12.266666666666666	1	1	0	0
19760514	27402238	39465797	M	64.5762893734382501	MARRIED	WHITE	Medicare	English	2165-08-05 13:00:00.000000	2165-07-29 17:27:00.000000	2165-07-30 16:07:09.000000	2165-08-04 14:44:39.000000	6.8145833333333333	4.94	2165-09-25	0	58	0	1	180	64.6	1	39	4	3	4	1	2165-08-04 03:00:00.000000	5.4	140	1.3	36			140	10.4	5.4	140	1.25	33.5			139	10.4	0	0	1	1	2449.1014406383038
18081643	21231174	39466113	F	75.3712978122876218	WIDOWED	WHITE	Medicare	English	2138-06-18 15:00:00.000000	2138-05-16 20:32:00.000000	2138-05-16 21:51:00.000000	2138-05-25 17:54:16.000000	32.7694444444444444	8.84	2139-02-08	0	268	0	1	152	50	1	66	11	3	6	2	2138-05-18 15:45:00.000000	6.3	155	0.9	17			143	13.5	6.199999999999999	110.66666666666667	0.75	14.5			140.22222222222223	9.879999999999999	1	0	1	1	19290.828981947154
12800964	21835061	39466514	F	76.96789137977925138219	DIVORCED	WHITE	Medicare	English	2125-12-23 14:00:00.000000	2125-12-20 12:21:00.000000	2125-12-20 12:21:54.000000	2125-12-23 16:16:30.000000	3.06875	3.16	2125-12-23	1	3	1	1	152	39	1	50	7	4	8	1	2125-12-21 23:23:00.000000	10.9	322	0.5	10	0.02		138	7.9	16.4	267	0.64	9	0.04666666666666667		144	9.95	1	0	0	0	3596.504985516891
18659491	29922231	39470604	M	71.78245686725817707468	WIDOWED	WHITE	Medicare	English	2135-11-05 15:53:00.000000	2135-10-13 18:52:00.000000	2135-10-13 19:37:00.000000	2135-10-17 00:48:28.000000	22.8756944444444444	3.22	2135-11-12	0	30	0	1		70.8	1	54	5	2	7	2	2135-10-15 05:00:00.000000	5.7	127	1.8	38	0.04		133	12.1	9.466666666666667	126.66666666666667	2.2399999999999998	49.2	0.045		132.8	12.533333333333333	1	0	0	0	3030.0833372101188
[truncated: 60 more rows]
[truncated: 5 more columns]
